# Supplementary material for: Visualizing synaptic plasticity in vivo by large-scale imaging of endogenous AMPA receptors
Source: eLife. 2021 Oct 18;10:e66809. doi: 10.7554/eLife.66809 (PMC8616579; doi:10.7554/eLife.66809)
Supplement: Figure 1—source data 4. [file elife-66809-fig1-data4.xlsx]

## Sheet: Fig.1e,f
			A1		A2		A3		PSD95		A1/PSD95		A2/PSD95		A3/PSD95
	P2	WT	1550	1	1300	1	1540	1	636	1	2.43711	1	2.04403	1	2.42138	1
		SEP-GluA1 HM	577	0.372258	1210	0.930769	1560	1.01299	438	0.688679	1.31735	0.540539	2.76256	1.35153	3.56164	1.47091
	PSD	WT	1280	1	1240	1	2040	1	729	1	1.75583	1	1.70096	1	2.79835	1
		SEP-GluA1 HM	879	0.686719	1680	1.35484	2960	1.45098	697	0.956104	1.26112	0.718247	2.41033	1.41704	4.24677	1.5176
Figure 1e-f
Dataset1	P2	WT	3960	1	1770	1	1310	1	3630	1	1.09091	1	1.35115	1	0.360882	1
		SEP-GluA1 HM	2530	0.638889	2220	1.25424	1880	1.43511	6190	1.70523	0.408724	0.374663	1.18085	0.873963	0.303716	0.841594
	PSD	WT	2380	1	1190	1	1290	1	3220	1	0.73913	1	0.922481	1	0.400621	1
		SEP-GluA1 HM	1990	0.836134	1720	1.44538	1760	1.36434	6160	1.91304	0.323052	0.43707	0.977273	1.0594	0.285714	0.713178
Dataset2	P2	WT	2040	1	5430	1	1380	1	106	1	19.2453	1	51.2264	1	13.0189	1
		SEP-GluA1 HM	765	0.375	5470	1.00737	1460	1.05797	99.7	0.940566	7.67302	0.398696	54.8646	1.07102	14.6439	1.12482
	PSD	WT	929	1	3130	1	1150	1	122	1	7.61475	1	25.6557	1	9.42623	1
		SEP-GluA1 HM	581	0.625404	3930	1.25559	1530	1.33043	97.6	0.8	5.95287	0.781755	40.2664	1.56949	15.6762	1.66304
Dataset3	P2	WT	2450	1	5740	1	1450	1	198	1	12.3737	1	28.9899	1	7.32323	1
		SEP-GluA1 HM	1060	0.432653	5690	0.991289	1470	1.01379	160	0.808081	6.625	0.535408	35.5625	1.22672	9.1875	1.25457
	PSD	WT	1260	1	3750	1	1200	1	275	1	4.58182	1	13.6364	1	4.36364	1
		SEP-GluA1 HM	577	0.457937	3400	0.906667	1200	1	197	0.716364	2.92893	0.639251	17.2589	1.26565	6.09137	1.39594
Dataset4	P2	WT	2040	1	696	1	2810	1	1860	1	1.09677	1	0.374194	1	1.51075	1
		SEP-GluA1 HM	886	0.434314	747	1.07328	3000	1.06762	1770	0.951613	0.500565	0.456397	0.422034	1.12785	1.69492	1.1219
	PSD	WT	5340	1	1290	1	6350	1	5120	1	1.04297	1	0.251953	1	1.24023	1
		SEP-GluA1 HM	2410	0.451311	1130	0.875969	6510	1.0252	4910	0.958984	0.490835	0.470613	0.230143	0.913434	1.32587	1.06904
Dataset5	P2	WT	1740	1	633	1	1880	1	1310	1	1.32824	1	0.483206	1	1.43511	1
		SEP-GluA1 HM	778	0.447126	645	1.01896	2340	1.24468	1490	1.1374	0.522148	0.393111	0.432886	0.895862	1.57047	1.09432
	PSD	WT	4550	1	1120	1	4870	1	4630	1	0.982721	1	0.241901	1	1.05184	1
		SEP-GluA1 HM	2480	0.545055	1180	1.05357	7170	1.47228	5440	1.17495	0.455882	0.463898	0.216912	0.896698	1.31801	1.25306
Dataset6	P2	WT	3070	1	727	1	2610	1	1790	1	1.71508	1	0.406145	1	1.4581	1
		SEP-GluA1 HM	1240	0.403909	724	0.995873	2660	1.01916	1770	0.988827	0.700565	0.408473	0.40904	1.00713	1.50282	1.03067
	PSD	WT	5500	1	1360	1	6290	1	5430	1	1.01289	1	0.25046	1	1.15838	1
		SEP-GluA1 HM	2010	0.365455	1090	0.801471	6060	0.963434	4430	0.815838	0.453725	0.44795	0.24605	0.982389	1.36795	1.18091
