# Supplementary material for: Visualizing synaptic plasticity in vivo by large-scale imaging of endogenous AMPA receptors
Source: eLife. 2021 Oct 18;10:e66809. doi: 10.7554/eLife.66809 (PMC8616579; doi:10.7554/eLife.66809)
Supplement: Figure 2—source data 1. [file elife-66809-fig2-data1.xlsx]

## Sheet: Fig 2a
on slices, with TTX		amplitude (pA)	frequency (Hz)	Ra (Mohms)	Events	Decay time (ms)	animal age	gender
KI	20170421c1	7.028	0.176	16.67	97	8.83	P22	F
	20170421c2	10.329	0.203	10.33	106	10.93
	20170421c3	8.927	0.219	16.76	72	10.993
	20170421c4	8.44	0.247	18.47	194	11.431
	20170421c5	10.174	0.303	11.96	194	10.043
	20170421c9	8.32	0.0989	14.023	69	9.683
	20170422c6	9.1	0.292	11.1	232	8.5	P20	F
	20170422c7	12.412	0.48	12.41	251	8.231
	20170422c9	7.63	0.223	13.19	80	9.415
	20170807c2	9.63	0.36	13.4	122	9.863	P24	M
	20170807c6	12.14	0.46	11.93	259	8.939
	20170807c7	16.25	0.44	9.08	283	7.011
	20170807c8	9.022	0.304	12	106	7.788
	20170807c9	11.72	0.49	12.2	215	7.872
	20170808c1	10.81	0.239	10.7	153	7.099	P24	M
	20170808c2	11.08	0.335	7.5	188	7.958
	20170808c5	10.075	0.522	9.8	253	7.857
	20170808c6	11.67	0.55	7.7	245	6.531
WT	20170421c6	9.937	0.291	11.536	296	9.168	P22	F
	20170421c7	8.36	0.314	13.34	79	9.661
	20170421c10	10.528	0.336	10.53	153	8.909
	20170422c1	8.246	0.416	10.88	278	8.688	P20	F
	20170422c3	9.798	0.314	8.4	246	7.329
	20170422c5	8.523	0.28	15.46	225	7.784
	20170422c10	9.661	0.407	10.26	225	8.036
	20170422c11	9.139	0.257	18.14	214	8.877
	20170807c1	9.59	0.328	8.5	140	8.788	P24	M
	20170807c3	10.078	0.244	9.4	137	9.155
	20170807c4	9.55	0.33	10	96	8.691
	20170807c5	10.99	0.233	9.94	140	7.867
	20170808c3	8.52	0.36	15.8	202	8.845	P24	M
	20170808c4	9.965	0.455	10.8	150	7.193
	20170808c7	8.56	0.398	16	162	9.109
	20170808c8	9.448	0.25	8.4	131	7.679

## Sheet: Fig 2d
		Rs	slope_negt	slope_post	IR	EPSC amp at-60mV	animal age	gender	abf files
KI	20170726c1	11.24	0.94844	0.76969	1.23224	-58.8642	P23	F	2017_07_26_0001-8
			0.96001	0.88975	1.07897	-55.2066			2017_07_26_0001-8
	20170726c4	12.84	1.2104	0.85627	1.41357	-74.4989			2017_07_26_0028-35
			0.68905	0.43588	1.58082	-42.2473			2017_07_26_0028-35
	20170726c5	12.41	1.2281	1.0326	1.18933	-82.5041			2017_07_26_0041-47
			0.63776	0.60567	1.05298	-36.835			2017_07_26_0041-47
	20170926c3	13.13	2.9854	2.1006	1.42121	-188.635	P20	F	2017_09_26_0014-21
	20170926c4	14.22	1.4407	1.1428	1.26068	-85.2338			2017_09_26_0023-29
	20170926c6	10.5	2.9246	1.9299	1.51542	-182.004			2017_09_26_0033-42
	20170926c7	16.5	1.9379	1.2041	1.60942	-129.478			2017_09_26_0043-48
	20170927c4	12	2.5395	1.7779	1.42837	-157.55	P21		2017_09_27_0033-34
	20170927c5	12.13	2.0536	1.4758	1.39152	-127.564			2017_09_27_0035-39
	20170927c6	14	1.0323	0.8392	1.2301	-66.071			2017_09_27_0041-48
	20171013c1	10	1.133	0.95198	1.19015	-75.133	P22		2017_10_13_0000-6
	20171013c2	12.4	1.3849	0.89659	1.54463	-94.967			2017_10_13_0008-12
	20171013c5	13	1.5428	1.3036	1.18349	-95.122			2017_10_13_0027-31
	20171013c6	14	0.98614	0.7829	1.2596	-57.147			2017_10_13_0033-37
WT	20170726c3	10	0.85442	0.71864	1.18894	-54.6551	P23	F	2017_07_26_0019-26
			0.9947	0.79907	1.24482	-60.1034			2017_07_26_0019-26
	20170926c1	9.35	3.4298	2.4318	1.4104	-221.069	P20	F	2017_09_26_0000-6
	20170926c2	11.83	2.4613	2.4094	1.02154	-159.321			2017_09_26_0007-13
	20170926c9	12.4	1.6178	1.0503	1.54032	-96.403			2017_09_26_0053-56
	20170927c2	11.59	1.0637	0.92769	1.14661	-66.8146	P21		2017_09_27_0017-22
	20170927c3	11.88	1.9344	1.3222	1.46302	-109.56			2017_09_27_0023-32
	20170927c7	13	1.6775	1.1591	1.44724	-98.823			2017_09_27_0049-56
	20170927c8	13.73	2.4828	1.6863	1.47234	-157.973			2017_09_27_0057-64
	20171013c3	11.6	2.2204	1.7625	1.2598	-141.96	P22		2017_10_13_0014-22
	20171013c4	10	1.5562	1.3014	1.19579	-98.05			2017_10_13_0023-26
	20171013c8	12.26	2.6658	1.793	1.48678	-169.05			2017_10_13_0042-51

## Sheet: Fig 2i
Area (from mCherry spine)	SEP-GluA1	GluA1 c-term	PSD-95				Area (from mCherry spine)	SEP-GluA1	GluA1 c-term	PSD-95			SEP-GluA1	GluA1 c-term	PSD-95		These values are normalized to max
0.555	39708.1	25786	23330.6			max	1.215	51500	40284.1	43464.9			77.1031	64.0104	53.6768
0.65	32817.2	21632.4	26956.1										63.7226	53.6996	62.0181
0.583	15103.5	12944.8	10630.9										29.3271	32.1338	24.4586
0.449	14697.9	11593.6	9493.75										28.5397	28.7797	21.8423
0.325	9264.85	5775.32	8095.62										17.99	14.3365	18.6256
0.765	25627.1	11794.8	12354.5										49.7614	29.279	28.4241
0.421	28743.9	19106.3	13398.7										55.8134	47.4288	30.8265
0.516	22685.9	9772.15	8549.28										44.0503	24.2581	19.6694
0.287	15065.5	8741.87	15497.9										29.2533	21.7005	35.6562
0.822	37039.4	21964.8	17654.1										71.9211	54.5247	40.617
0.803	22469.2	13751.6	13178.4										43.6296	34.1364	30.3196
0.249	12985.7	11530.4	6483.15										25.2149	28.6227	14.9158
0.516	17057.9	11567.8	16534.5										33.122	28.7156	38.041
0.488	21776.4	18755.8	13564.4										42.2842	46.5587	31.2078
0.813	14678.8	11008.9	14919.7										28.5024	27.3281	34.3259
0.564	12890.7	6696.46	16035.3										25.0305	16.6231	36.8925
0.679	16456.1	9425.38	11463.3										31.9535	23.3972	26.3736
0.775	28369.7	16049.4	14986.3										55.0867	39.8405	34.479
0.708	16487.5	11993.9	10751.2										32.0145	29.7734	24.7353
1.061	21448.7	15007.9	19247.8										41.648	37.2551	44.2834
0.449	24106.4	14337.9	16987.9										46.8085	35.5919	39.0842
0.689	29847.5	14950.5	13886.9										57.9563	37.1127	31.9497
0.469	23565.6	14739.1	10509.3										45.7585	36.5879	24.1788
0.421	40987.5	30333.2	13547.6										79.5873	75.2981	31.169
0.392	27129.7	21691.8	17243.2										52.679	53.8471	39.6716
0.602	29254.6	20555.9	20059.3										56.8051	51.0274	46.1506
0.411	19724.5	16838.6	19244.3										38.3001	41.7996	44.2756
0.861	22325.5	13081	22803.1										43.3504	32.4718	52.4631
0.249	8287.11	10177	13588.9										16.0915	25.263	31.2641
0.564	24158.8	12680.3	25440.8										46.9104	31.4772	58.5318
0.392	11574.5	7989.88	15153.2										22.4748	19.8338	34.863
0.727	29295.5	14822.4	18734.7										56.8845	36.7946	43.103
0.583	35010.4	14965.2	26095.5										67.9813	37.1491	60.038
0.516	36472.5	18945.6	22654.2										70.8203	47.0299	52.1207
0.182	8808.53	10114.3	15343.6										17.1039	25.1074	35.3012
0.258	30433.8	12999.1	24013.9										59.0947	32.2686	55.2489
0.249	39947.5	12803.6	18286.8										77.568	31.7832	42.0725
0.201	20179.2	13170.5	16409.2										39.1829	32.6941	37.7527
0.325	16320.1	12408.9	13006.6										31.6894	30.8034	29.9243
0.402	27722.9	16356	11065.7										53.8308	40.6015	25.4589
0.545	24868.5	17225.5	19037										48.2882	42.7601	43.7985
0.44	24444.3	12471.7	18241.7										47.4646	30.9594	41.9689
0.469	8288.51	6217.14	11501.6										16.0942	15.4332	26.4618
0.555	23916.1	12463.4	22098.4										46.4391	30.9387	50.8418
0.602	32463.2	16824.7	21040.8										63.0353	41.7651	48.4087
0.296	31886.6	16387.1	15668.2										61.9158	40.6787	36.0479
0.277	18433.4	9497.79	10241.3										35.793	23.577	23.5622
0.277	27590.3	9560.86	9762.38										53.5733	23.7336	22.4604
0.296	16682.3	10487.4	16061.9										32.3928	26.0335	36.9538
0.21	36341.6	15803	6331.32										70.5663	39.2288	14.5665
0.564	35176.3	19315.1	13708										68.3035	47.9471	31.538
0.363	35946	13388	19318										69.7981	33.2339	44.445
0.373	33314.1	10876.5	12993.6										64.6875	26.9994	29.8944
0.44	18768.4	11195.6	14671.4										36.4435	27.7917	33.7545
0.268	30693.4	18705.2	22848.1										59.5989	46.4333	52.5667
0.306	28917	20288.8	23981										56.1496	50.3642	55.1732
0.593	31425.4	16555.7	12105.6										61.0202	41.0972	27.8514
0.66	28652.9	16414.4	9814.85										55.6366	40.7466	22.5811
0.918	27272.2	12024.1	9704.16										52.9556	29.8482	22.3264
0.516	30725	15660.5	9157.41										59.6602	38.8751	21.0685
0.564	40937.9	20366.3	9413.15										79.4911	50.5567	21.6569
0.536	37581.3	20004.4	22481.8										72.9734	49.6582	51.724
0.88	21414.4	13777.9	16472.3										41.5813	34.2019	37.8979
0.65	25021.4	16562.6	15531.6										48.5852	41.1145	35.7336
0.593	14989	13204.3	19321.4										29.1048	32.7779	44.4528
0.497	24332.8	11522.4	23300.9										47.2481	28.6028	53.6085
0.449	42089.6	16624.6	18334.1										81.7274	41.2682	42.1813
0.43	21109.8	10670.7	17886.9										40.9899	26.4887	41.1526
0.937	32316.7	19878	28932.7										62.7508	49.3446	66.5657
0.469	19989.9	13399.3	24421.8										38.8153	33.2619	56.1873
0.564	31765.9	21970.7	29681.2										61.6814	54.5393	68.2877
0.555	21760	15834.6	18669.1										42.2524	39.3072	42.952
0.459	20000.4	16703.1	20482.8										38.8356	41.4633	47.1249
0.277	28570.6	16524.2	22589.7										55.4768	41.019	51.9723
0.421	21314.4	15006.2	23714										41.3872	37.2509	54.559
0.583	23961.5	15796	21570.7										46.5271	39.2114	49.6278
0.402	18030	10327	18313.9										35.0096	25.6355	42.1349
0.469	24686.9	19473.3	26328.4										47.9357	48.34	60.5739
0.497	33686	17341.5	27921.7										65.4097	43.048	64.2396
0.497	41845.7	26565.2	31193.9										81.2537	65.9445	71.7679
0.411	8800.28	6096.23	9485.14										17.0879	15.1331	21.8225
0.392	15550.5	9711.07	11334.7										30.1951	24.1064	26.0778
0.325	26532	14660	23985.3										51.5185	36.3916	55.1832
0.402	24995.1	13780.5	18167.3										48.5342	34.2082	41.7975
0.44	25350.2	17690.7	33273.3										49.2237	43.9147	76.5521
0.65	37399.9	27092.7	33319.6										72.6211	67.254	76.6586
0.669	47335.2	40284.1	37249.3										91.913	100	85.6997
0.641	19274.9	18166.3	31599.2										37.427	45.0954	72.7004
0.88	22069.7	13740.3	31335.7										42.8537	34.1085	72.0941
0.679	20834.5	12620.5	18065										40.4552	31.3287	41.5623
0.755	38739.8	16928.7	18475.5										75.2228	42.0232	42.5067
0.411	26361	12087.9	13980.4										51.1863	30.0066	32.1649
0.755	19261.2	11804.6	16194.5										37.4005	29.3034	37.2589
0.736	19585.7	11574.2	14729										38.0304	28.7314	33.8871
0.602	27921.1	14641.4	17816.6										54.2157	36.3454	40.9908
0.421	17774.3	10239	19506.3										34.5132	25.4169	44.8783
0.622	37707.2	22257	24270.6										73.2178	55.2501	55.8394
0.268	13148.7	7368.68	11149.5										25.5314	18.2918	25.6517
0.602	22007.9	10615	13633.5										42.7337	26.3504	31.3666
0.88	32774.4	20576.8	27966.8										63.6395	51.079	64.3434
0.507	26295.8	15621	32556.9										51.0599	38.7771	74.9039
0.507	38686.8	24402.9	28525.1										75.1199	60.577	65.6278
0.421	22203.4	18590.2	28677.7										43.1134	46.1476	65.9789
0.392	27821.6	15180.2	28992.6										54.0224	37.6828	66.7033
0.363	29246.4	17420.9	20225.3										56.7892	43.2451	46.5325
0.689	37254.8	21918.9	25936.6										72.3395	54.4107	59.6724
0.794	38439.3	25324	28701.1										74.6395	62.8635	66.0329
0.449	45220.3	24299.3	18864.8										87.8064	60.3199	43.4024
0.507	41546.9	31998.6	35162.8										80.6736	79.4324	80.8991
0.497	50859.4	23532	20597										98.756	58.4151	47.3875
0.545	38368.1	30402.6	32001.4										74.5011	75.4705	73.6257
0.631	45841	28216.8	36631										89.0117	70.0446	84.2772
0.469	51500	25927.7	43464.9										100	64.362	100
0.631	29972.7	21796.8	34856.9										58.1993	54.1076	80.1955
0.593	14260.5	8690.53	11501.8										27.6902	21.5731	26.4623
0.306	16296.8	8552.16	13121.2										31.6443	21.2296	30.1879
0.411	30696.2	19308.6	21673.3										59.6042	47.931	49.8639
0.507	27316.5	13769.3	14179.7										53.0417	34.1805	32.6233
0.622	23953.4	12766.8	18833.3										46.5115	31.692	43.3298
0.411	30508.2	16990.4	27151.2										59.2392	42.1764	62.4668
0.373	22336.4	13393.3	17927.2										43.3716	33.2471	41.2452
0.191	18811.2	8345.9	19463.5										36.5266	20.7176	44.7799
0.392	11707	10288.5	10561.1										22.7319	25.5397	24.298
0.689	30708	18342.7	17623.6										59.6272	45.5332	40.5468
0.526	19649.3	14051.2	16205.3										38.154	34.8803	37.2836
0.622	31335	15990.1	17094.4										60.8446	39.6932	39.3292
0.631	30179.6	16555.9	19118.9										58.6011	41.0978	43.987
0.478	30785	15643.8	12341.1										59.7766	38.8335	28.3932
0.679	22882.3	11397.3	14878.8										44.4316	28.2922	34.2318
0.43	21188.6	17148.2	13976.5										41.143	42.5681	32.1557
0.488	13129	9556.35	8299.92										25.4932	23.7224	19.0957
0.469	34060.3	17821.3	21958.5										66.1364	44.239	50.5201
0.449	41020.5	24122.2	26839.1										79.6514	59.8802	61.7489
0.392	24536.9	10631.6	17281.9										47.6444	26.3916	39.7604
0.727	21535.7	15580.9	20379.6										41.8168	38.6775	46.8875
0.698	30816	22680.4	18762.4										59.8369	56.3011	43.1667
0.574	25183.8	13734.7	18718.3										48.9006	34.0945	43.0654
0.421	35018.6	19827.4	20647.7										67.9973	49.2188	47.5043
0.421	30869.3	21356.4	26130										59.9404	53.0143	60.1174
0.717	38304.4	16360.6	39225.6										74.3775	40.6131	90.2464
0.66	20447.6	10491.1	22727.1										39.704	26.0428	52.2883
0.287	15189.5	7397.7	20146										29.4941	18.3638	46.3499
0.717	23443.7	14328.6	28054.3										45.5217	35.5687	64.5448
0.574	28358.5	18189.9	30951.1										55.065	45.154	71.2093
0.593	26170.6	16652	32163.4										50.8168	41.3365	73.9985
0.316	18759.5	9468	28507										36.4261	23.503	65.5862
0.258	20366.3	10372.3	25794.7										39.5462	25.7478	59.346
0.258	19622.1	9009.78	15685.5										38.1012	22.3656	36.0877
0.516	17506.8	12246.9	18210.6										33.9937	30.4014	41.8972
0.679	21272.9	7643.06	22545.8										41.3066	18.9729	51.8713
0.574	6978.15	7191.6	5366.73										13.5498	17.8522	12.3473
0.602	27181.9	13991.7	20510.2										52.7804	34.7325	47.1878
0.306	16371.1	15916.7	14218.7										31.7885	39.5111	32.7129
0.306	16149.5	9329.81	18924.8										31.3582	23.16	43.5404
0.373	28838.3	15601.8	11350.4										55.9966	38.7294	26.1138
0.459	16665.9	6030.38	14788.8										32.361	14.9696	34.0246
0.373	28592	18225.9	19046.7										55.5184	45.2434	43.8209
0.583	24096.1	14742.7	19587.7										46.7886	36.5968	45.0655
0.344	23123.6	6967.67	20774.9										44.9001	17.2963	47.7968
0.354	17829.4	5484.24	13893										34.6202	13.6139	31.9638
0.306	14453.1	14428.9	14735.1										28.0643	35.8178	33.9011
0.316	23454.6	10725.5	16121.2										45.543	26.6247	37.0902
0.555	23812.4	13925.9	23279.9										46.2376	34.5693	53.5601
0.449	9068.72	6327.77	7138.77										17.6092	15.7078	16.4242
0.344	8900.42	7685.19	10725.3										17.2824	19.0775	24.6758
0.344	18964	10889.2	12050.7										36.8233	27.031	27.7251
0.488	16185.3	7686.88	17288.3										31.4278	19.0817	39.7752
0.583	23586.8	10713.6	9831.57										45.7996	26.5951	22.6196
0.736	15432.7	8858.86	21193.7										29.9664	21.9909	48.7605
0.679	15622.3	9318.9	8158.55										30.3346	23.1329	18.7704
0.249	13264.3	8525.46	13291.9										25.756	21.1633	30.5807
0.459	34242.5	17825	27623.9										66.4902	44.2482	63.5545
0.459	16177.4	8859.71	13248.1										31.4124	21.993	30.4801
0.344	9924.69	5043.19	7859.36										19.2712	12.5191	18.0821
0.363	24672.2	10298.4	17153.5										47.9072	25.5643	39.4651
0.363	13779.5	13441.6	10734.8										26.7563	33.3671	24.6976
0.316	14478.1	9882.27	14858.7										28.1127	24.5314	34.1855
0.449	16218.1	8344.81	9895.45										31.4914	20.7149	22.7665
0.43	17326.9	6896.4	8525.78										33.6445	17.1194	19.6153
0.258	12428.6	7602.26	11806.4										24.1332	18.8716	27.163
0.201	6301.86	1866.57	9670.14										12.2366	4.63351	22.2481
0.277	19618.1	6956.65	13823										38.0935	17.269	31.8026
0.459	19080.4	13206.1	21058.7										37.0493	32.7824	48.4499
0.469	20533.4	14996.5	13103.4										39.8707	37.2268	30.147
0.516	11278.1	7782.07	13487.9										21.8992	19.318	31.0318
0.574	16301.9	12529.2	12190.8										31.6542	31.1021	28.0474
0.488	13533.7	6188.74	11655.7										26.2791	15.3627	26.8164
0.277	18693	6111.69	9540.14										36.2971	15.1715	21.949
0.316	22267.6	15116.8	20742.5										43.2381	37.5253	47.7225
0.249	6980.23	3330.31	8173.61										13.5538	8.26704	18.8051
0.612	21227.1	8254.88	11361.3										41.2176	20.4916	26.1391
0.899	20727.3	11955.8	17184.3										40.2471	29.6786	39.536
0.679	17069.3	8511.38	15714.4										33.1442	21.1284	36.1542
0.689	25682.3	15044.3	18833.1										49.8685	37.3456	43.3295
0.421	15307.3	10345.7	9149.82										29.7228	25.6819	21.051
0.402	8910.62	5100.69	14111.3										17.3022	12.6618	32.4659
0.555	8760.81	6116.57	5506.57										17.0113	15.1836	12.669
0.383	12132.8	4445.02	17217										23.5587	11.0342	39.6111
0.526	31347.9	19852.8	24759.6										60.8697	49.282	56.9645
0.698	22152.7	13415.4	17404.2										43.015	33.3018	40.042
0.526	22154.7	12233.1	11560.7										43.0188	30.367	26.5977
0.65	14484.6	11475.2	13809.6										28.1255	28.4856	31.7718
0.602	11657.9	8480.6	13259.9										22.6367	21.052	30.5071
0.335	9029.54	3831.63	10270.4										17.5331	9.51151	23.6291
0.287	8942.87	6124.8	6888.77										17.3648	15.204	15.849
0.383	13075.4	10540.9	7058.77										25.3891	26.1664	16.2402
0.526	19091.3	9561.94	13202.3										37.0704	23.7363	30.3746
0.679	24264.4	13631.4	25757.4										47.1154	33.8381	59.2603
1.004	32353.2	12840.1	22342.7										62.8218	31.8739	51.404
0.411	12398.8	6701.37	12394.4										24.0753	16.6353	28.5159
0.478	22904.4	31128.7	17848.7										44.4746	77.2728	41.0646
0.239	18259.6	7909	25649.8										35.4556	19.633	59.0126
0.985	11811.9	13558.2	25347										22.9356	33.6564	58.3161
0.526	14784.2	15838.1	23561.7										28.7071	39.3159	54.2084
0.622	13548.6	13216.5	20872										26.308	32.8081	48.0203
0.421	10742	8595.91	14217.7										20.8583	21.3382	32.7108
0.277	13690.4	12128.3	14091.7										26.5832	30.1068	32.4209
0.622	22323.8	19362.7	21434.2										43.3471	48.0653	49.3139
0.43	38855	20958.8	25043										75.4466	52.0275	57.6165
0.421	12947.4	14962	17707.5										25.1406	37.1412	40.7397
0.287	15351.9	14774.3	17434.8										29.8096	36.6752	40.1123
0.698	16371.9	13561.8	18181.2										31.7901	33.6652	41.8295
0.43	15125.4	12311.4	22407.6										29.3697	30.5615	51.5532
0.459	11621.1	11345.2	17273.7										22.5652	28.1629	39.7417
0.727	14747.3	10768.5	19828.9										28.6356	26.7314	45.6204
0.851	11757	12721.7	16201.8										22.8291	31.5799	37.2756
0.449	10819.8	12018.6	14670										21.0092	29.8347	33.7512
0.564	18406.7	14085.1	24477.3										35.7411	34.9644	56.3151
1.042	17448	17175.6	27526.3										33.8796	42.636	63.3299
0.411	7709.02	14322.8	19153.4										14.969	35.5544	44.0664
0.583	15245.2	10810.3	16769										29.6023	26.8352	38.5804
0.526	14473	12656.6	13462.2										28.1029	31.4183	30.9726
0.622	14315.2	14818.6	17685										27.7965	36.7851	40.688
0.794	13054.7	13341.9	15162.7										25.3489	33.1195	34.8848
0.689	14153.5	12268.4	15223.4										27.4825	30.4547	35.0247
1.004	13360.4	10791.8	14552.8										25.9425	26.7891	33.4817
0.536	10757.3	10345.2	13101.3										20.888	25.6805	30.1422
0.593	14272.8	17699	14749.6										27.7141	43.9354	33.9344
0.574	18110	14878.8	18108.4										35.165	36.9346	41.6621
0.449	16496	13943.7	9480.28										32.0311	34.6134	21.8113
0.392	13199	12678.4	15954.4										25.6292	31.4723	36.7065
0.411	11916.3	10000	13226										23.1385	24.8237	30.4291
0.22	6220.7	21456.7	7009.17										12.079	53.2633	16.126
0.889	17178.9	15090.6	24965.6										33.3572	37.4605	57.4384
0.516	12206.5	12496.6	9344.87										23.7019	31.0212	21.4998
0.612	12097.2	13988.4	17937.6										23.4897	34.7243	41.2692
0.421	24916.6	16303.3	18646.5										48.3818	40.4708	42.9
0.669	10865.2	15046.5	11993.9										21.0975	37.351	27.5944
0.488	14366.6	16438.4	17309.3										27.8963	40.8061	39.8236
0.478	15962.2	13658	16853.2										30.9946	33.9041	38.7742
0.43	8150.02	8622.24	9091.67										15.8253	21.4036	20.9172
0.383	15115.8	14947.4	10675.6										29.351	37.105	24.5613
0.555	17392.9	13927.5	15305.6										33.7726	34.5731	35.2137
0.316	15668.1	15683.2	7260.73										30.4235	38.9316	16.7048
0.536	14414.5	14283.8	10589.9										27.9893	35.4575	24.3642
0.344	6111.92	7615.81	9676.69										11.8678	18.9052	22.2632
0.354	16855.9	13131	6298.73										32.7299	32.596	14.4915
0.344	17962	13000.4	9067.97										34.8776	32.2717	20.8627
0.698	12981.5	10644.5	15638.8										25.2068	26.4237	35.9803
0.373	7877.8	7191.56	12095.6										15.2967	17.8521	27.8284
0.459	20474.1	11206.6	17533.6										39.7556	27.8189	40.3396
0.87	18778.6	12885.3	28482.9										36.4633	31.9861	65.5308
0.765	9018.23	8580.74	18153.4										17.5111	21.3005	41.7656
0.889	25147.8	12959.4	21430.1										48.8306	32.17	49.3044
0.918	24908.3	13183.8	9613.96										48.3656	32.7271	22.1189
0.775	26759.9	14620	21832.3										51.961	36.2921	50.2297
1.081	32584.5	16934.4	24156.6										63.2708	42.0375	55.5773
1.215	32193.9	20622.2	28525										62.5124	51.1917	65.6276
1.186	31829.9	15929.1	31014.1										61.8056	39.5419	71.3543
0.65	31553.8	16440.7	17311										61.2695	40.8119	39.8276
0.727	23451.7	13029.5	19221.8										45.5372	32.3439	44.2236
0.736	30976.9	14863.9	12927.8										60.1493	36.8975	29.7429
1.071	35125.1	15666.9	26947.9										68.2041	38.8911	61.9992
0.354	14487.5	10019.9	12368										28.1311	24.8731	28.4552
0.449	22322	10366.7	17275.6										43.3437	25.734	39.746
0.679	32895.5	21028.5	13159.9										63.8748	52.2004	30.2771
0.325	27651.5	18906.7	14204.4										53.6923	46.9334	32.6802
0.507	22411.1	12873.9	9621.47										43.5167	31.9578	22.1362
0.478	25595.6	16551.3	18020.9										49.7002	41.0863	41.4608
0.631	25874	16090.1	15207.6										50.2407	39.9416	34.9882
0.488	18229.4	12230.3	11786.9										35.3969	30.3602	27.1181
0.602	30284	15643.6	21457										58.8038	38.833	49.3663
0.583	20788.9	12031.1	21243.6										40.3668	29.8657	48.8752
0.392	31742.5	16889.7	16120.2										61.6358	41.9263	37.0878
0.421	16107.4	12630.6	6773.14										31.2766	31.3538	15.583
0.373	11056.2	4789.56	4999.74										21.4684	11.8895	11.5029
0.717	13473.7	6437.88	7746.13										26.1625	15.9812	17.8216
1.157	11433.7	9149.31	4748										22.2013	22.7119	10.9237
0.583	15523.2	11208.5	25259.7										30.1421	27.8235	58.1151
0.526	7892.02	6600.35	7496.51										15.3243	16.3845	17.2473
0.574	24811.3	17562.5	17211.7										48.1772	43.5965	39.5991
0.583	12403.9	9892.25	15016.3										24.0853	24.5562	34.5481
0.66	21665.3	15061.9	13086.3										42.0686	37.3892	30.1077
0.277	17396.4	24512.2	11553.2										33.7794	60.8482	26.5806
0.23	6622.67	5461.33	7810.67										12.8595	13.557	17.97
0.392	19124.3	12026	10599.4										37.1345	29.8531	24.386
0.736	14173	8695.58	12614.8										27.5204	21.5856	29.0228
0.736	25921.4	15158.8	23862.8										50.3327	37.6298	54.9012
0.449	16889.8	15651.5	15362										32.7957	38.8527	35.3434
0.277	11963.6	6670.9	5818.83										23.2303	16.5596	13.3874
0.287	12480.6	4770.6	16723.8										24.2341	11.8424	38.4765
0.411	8591.58	7314.12	5523.07										16.6827	18.1563	12.707
0.507	16261.1	8169.13	11330.6										31.575	20.2788	26.0683
0.296	9705.07	7225.77	5308.74										18.8448	17.937	12.2138
0.354	13729.5	7229.3	10027.9										26.6592	17.9458	23.0712
0.287	22592.2	7903.63	6135.6										43.8683	19.6197	14.1162
0.287	6540.4	8028.17	5113.73										12.6998	19.9289	11.7652
0.373	12081.2	6639.23	6534.23										23.4586	16.481	15.0333
0.488	10236.6	6731.82	4403.88										19.8769	16.7109	10.132
0.296	11263.6	10269	7457.19										21.8711	25.4915	17.1568
0.469	6115.2	5193.24	6806.29										11.8742	12.8915	15.6593
0.402	6743.45	4784.95	8488.59										13.0941	11.878	19.5298
0.411	6554.23	3832.21	6155.14										12.7267	9.51295	14.1612
0.383	9754.85	8049	7908.95										18.9414	19.9806	18.1962
0.402	7240.45	6133.95	9248.12										14.0591	15.2267	21.2772
0.669	14049.7	6877.56	9515.81										27.2809	17.0726	21.8931
0.421	14461.6	8102.77	11104.8										28.0808	20.1141	25.5488
0.765	12008.5	5404.95	4700.19										23.3176	13.4171	10.8137
0.354	2921.73	4679.68	4849.89										5.67326	11.6167	11.1582
0.469	7697.71	4492.92	4508.8										14.947	11.1531	10.3734
0.344	11401.8	6204.44	5676.53										22.1395	15.4017	13.06
0.679	27339.8	11275.2	20831.8										53.087	27.9891	47.9278
0.296	8794.13	4848.32	12896.7										17.076	12.0353	29.6715
0.421	13154.8	5464.2	6549.18										25.5432	13.5642	15.0677
0.449	8851.57	6068.72	6055.57										17.1875	15.0648	13.9321
0.698	19932.2	12728.2	12787.2										38.7033	31.596	29.4195
0.746	11263.2	8343.69	5632.24										21.8702	20.7121	12.9581
0.249	5846.96	3893.96	3110.73										11.3533	9.66624	7.15687
0.325	7769.44	5001.18	7264.77										15.0863	12.4148	16.7141
0.717	18881.3	10697.2	14532.8										36.6626	26.5543	33.4357
0.612	16995.1	10387.9	10354.7										33.0003	25.7866	23.8232
0.842	30510.2	17092.2	24931.5										59.243	42.4291	57.36
