# Supplementary material for: Visualizing synaptic plasticity in vivo by large-scale imaging of endogenous AMPA receptors
Source: eLife. 2021 Oct 18;10:e66809. doi: 10.7554/eLife.66809 (PMC8616579; doi:10.7554/eLife.66809)
Supplement: Figure 3—source data 5. [file elife-66809-fig3-data5.xlsx]

## Sheet: Fig.3A
Figure 3a-b
	Dataset1		sGluA1	Normalized to WT/KI Con	sGluA2	Normalized to WT/KI Con	sGluA3	Normalized to WT/KI Con
	WT	Con1	10400	1	958	1	160	1
		Bic1	8820	0.848077	907	0.946764	146	0.9125
		TTX1	11800	1.13462	1140	1.18998	204	1.275
	SEP-GluA1 HM	Con1	3430	1	1220	1	248	1
		Bic1	2340	0.682216	1190	0.97541	222	0.895161
		TTX1	4710	1.37318	1380	1.13115	306	1.23387
	WT	Con2	13200	1	1190	1	215	1
		Bic2	6860	0.519697	816	0.685714	126	0.586047
		TTX2	13800	1.04545	1300	1.09244	214	0.995349
	SEP-GluA1 HM	Con2	4540	1	1390	1	349	1
		Bic2	2580	0.568282	1130	0.81295	207	0.593123
		TTX2	5050	1.11233	1460	1.05036	284	0.813754
	Dataset2		sGluA1	Normalized to WT/KI Con	sGluA2	Normalized to WT/KI Con
	WT	Con	6350	1	1680	1
		Bic	5430	0.855118	1430	0.85119
		TTX	10600	1.66929	2500	1.4881
	SEP-GluA1 HM	Con	1230	1	1640	1
		Bic	857	0.696748	1360	0.829268
		TTX	1530	1.2439	2390	1.45732
	Dataset3		sGluA1	Normalized to WT/KI Con	sGluA2	Normalized to WT/KI Con	sGluA3	Normalized to WT/KI Con
	WT	Con	11600	1	1830	1	535	1
		Bic	7450	0.642241	1520	0.830601	342	0.639252
		TTX	11900	1.02586	1870	1.02186	464	0.86729
	SEP-GluA1 HM	Con	1800	1	1290	1	320	1
		Bic	1240	0.688889	1260	0.976744	262	0.81875
		TTX	2410	1.33889	1550	1.20155	372	1.1625
	Dataset4		sGluA1	Normalized to WT/KI Con	sGluA2	Normalized to WT/KI Con	sGluA3	Normalized to WT/KI Con
	WT	Con1	23800	1	3040	1	559	1
		Bic1	16500	0.693277	2680	0.881579	375	0.670841
		TTX1	24700	1.03782	3060	1.00658	466	0.833631
	SEP-GluA1 HM	Con1	5480	1	2480	1	318	1
		Bic1	3910	0.713504	2210	0.891129	228	0.716981
		TTX1	6980	1.27372	2670	1.07661	314	0.987421
	WT	Con2	24800	1	3210	1	568	1
		Bic2	16400	0.66129	2670	1	374	0.658451
		TTX2	25000	1.00806	3380	1.05296	532	0.93662
	SEP-GluA1 HM	Con2	5580	1	2410	1	338	1
		Bic2	3630	0.650538	2050	0.850622	201	0.594675
		TTX2	6260	1.12186	2560	1.06224	307	0.908284
	Dataset5		sGluA1	Normalized to WT/KI Con	sGluA2	Normalized to WT/KI Con	sGluA3	Normalized to WT/KI Con
	WT	Con1	20400	1	2010	1	1320	1
		Bic1	14600	0.715686	1670	0.830846	1000	0.757576
		TTX1	25000	1.22549	2270	1.12935	1450	1.09848
	SEP-GluA1 HM	Con1	5090	1	1340	1	771	1
		Bic1	2990	0.587426	1170	0.873134	517	0.670558
		TTX1	6870	1.34971	1490	1.11194	782	1.01427
	WT	Con2	20200	1	1940	1	1370	1
		Bic2	13900	0.688119	1570	0.809278	921	0.672263
		TTX2	23200	1.14851	2010	1.03608	1240	0.905109
	SEP-GluA1 HM	Con2	5420	1	1650	1	948	1
		Bic2	3460	0.638376	1350	0.818182	687	0.724684
		TTX2	6740	1.24354	1770	1.07273	967	1.02004

## Sheet: Fig 3d,e
	Cells	Ra (Mohm)	Norm. magnitude at 30-40min	animal age	gender	abf files	baseline	induction	post induction
KI	20170322c1	20	1.67796	P27	F		2017_03_22_0000	2017_03_22_0001	2017_03_22_0002
	20170407c2	27	2.22451	P20			2017_04_07_0006,7	2017_04_07_0008	2017_04_07_0009
	20170407c3	28	1.18413				2017_04_07_0017,18	2017_04_07_0020	2017_04_07_0021,22,23
	20171110c1	13	1.23838	P25	M		2017_11_10_0000	2017_11_10_0001	2017_11_10_0002
	20171110c2	11	1.75042				2017_11_10_0003	2017_11_10_0004	2017_11_10_0005
	20171110c3	14	1.48392				2017_11_10_0007	2017_11_10_0008	2017_11_10_0009
	20171126c3	12	1.42318	P26	M		2017_11_26_0006	2017_11_26_00067	2017_11_26_0008
	20171126c4	13	1.77186				2017_11_26_0009	2017_11_26_0009	2017_11_26_0009
WT	20170408c3	30	1.51417	P21			2017_04_08_0013	2017_04_08_0015	2017_04_08_0016,17
	20171109c3	11	1.93201	P24	M		2017_11_09_0006	2017_11_09_0007	2017_11_09_0008
	20171109c6	20	1.31201				2017_11_09_0016	2017_11_09_0017	2017_11_09_0018
	20171127c1	18	1.40301	P27	M		2017_11_27_0000	2017_11_27_0001	2017_11_27_0002,3
	20171127c2	12	1.21036				2017_11_27_0004	2017_11_27_0005	2017_11_27_0006
	20171127c3	13	1.22587				2017_11_27_0007	2017_11_27_0008	2017_11_27_0009
	20171127c4	10	2.39527				2017_11_27_0010	2017_11_27_0011	2017_11_27_0012
	20180201c3	10.5	2.25539	P27	M		2018_02_01_0008	2018_02_01_0009	2018_02_01_0010
