# Supplementary material for: Visualizing synaptic plasticity in vivo by large-scale imaging of endogenous AMPA receptors
Source: eLife. 2021 Oct 18;10:e66809. doi: 10.7554/eLife.66809 (PMC8616579; doi:10.7554/eLife.66809)
Supplement: Figure 4—source data 1. [file elife-66809-fig4-data1.xlsx]

## Sheet: Cohort summary
	Numbers
	18 WT	9F 9M
	16 SEP-GluA1 KI	9F 7M
	cohort 1	cohort 2
	6-10 weeks	9 weeks

## Sheet: Figure 4a,b
		Locomotor Activity test
		Exposure to novel area for 30 mins. Area lit. Animals tested at 14:00, coming from the dark phase (awake)
		B15C	Data in 60s time bins
Tested during dark phase
Fan and lights on within the open field boxes						1 minute bins for 30 mins total
			Beam breaks	Group	SEX	T1	T2	T3	T4	T5	T6	T7	T8	T9	T10	T11	T12	T13	T14	T15	T16	T17	T18	T19	T20	T21	T22	T23	T24	T25	T26	T27	T28	T29	T30	Total
Date tested	Cohort	DOB	ID
8/28/17	1	7/18/17	Cage A tail 1 WT	WT	M	178	250	173	157	96	166	153	195	120	161	166	173	110	147	175	166	100	221	105	124	184	183	139	86	119	163	165	176	114	107	4572
8/28/17	1	7/18/17	Cage A tail 2 KI	KI	M	95	161	149	109	141	90	125	105	112	118	96	150	117	110	79	83	75	97	76	133	108	114	94	60	89	110	94	93	103	116	3202
8/28/17	1	2017-09-07	Cage B tail 1 WT	WT	F	144	155	158	109	127	153	123	158	63	87	107	86	111	88	105	96	162	146	149	43	96	114	112	126	93	121	121	135	119	144	3551
8/28/17	1	2017-09-07	Cage B tail 2 KI	KI	F	196	167	173	177	120	187	108	143	114	126	125	127	124	150	138	127	149	147	115	77	105	154	124	128	148	145	87	61	40	111	3893
8/28/17	1	6/26/17	Cage C tail 1 KI	KI	M	137	119	122	98	110	124	85	96	122	84	62	59	86	88	74	86	62	99	91	71	79	106	20	58	85	102	81	85	26	75	2592
8/28/17	1	6/26/17	Cage C tail 2 WT	WT	M	161	165	154	139	100	108	112	109	117	131	93	91	78	69	67	119	90	81	66	76	79	59	86	81	94	96	88	62	106	96	2973
8/28/17	1	2017-12-06	Cage D tail 1 WT	WT	F	183	186	108	153	128	136	112	137	108	109	113	126	136	169	128	129	129	137	135	125	155	162	117	128	140	154	107	120	120	171	4061
8/28/17	1	2017-12-06	Cage D tail 2 KI	KI	F	288	212	131	102	98	133	88	115	129	129	72	121	152	182	118	152	137	100	95	140	115	87	132	120	188	131	37	60	108	170	3842
8/28/17	1	6/26/18	Cage E tail 1 KI	KI	M	204	146	137	160	119	78	91	126	107	105	81	115	79	105	100	41	53	86	96	71	78	86	89	82	111	75	82	82	100	106	2991
8/28/17	1	6/26/18	Cage E tail 2 WT	WT	M	173	178	167	139	149	129	123	158	133	147	114	64	104	123	133	141	147	105	114	117	87	125	84	96	47	109	101	139	126	105	3677
8/28/17	1	6/26/18	Cage E tail 3 KI	KI	M	165	98	150	120	65	82	121	93	112	89	128	100	45	92	93	137	108	90	43	92	98	81	79	80	80	116	83	73	48	34	2795
8/28/17	1	6/26/18	Cage E tail 4 WT	WT	M	181	101	103	47	115	91	99	121	103	89	106	101	94	65	107	105	85	92	114	111	80	94	85	76	107	97	134	131	143	87	3064
10/16/17	2	2017-11-08	Cage G tail 1	KI	M	157	133	167	143	177	154	130	89	119	109	105	95	76	110	124	91	108	71	37	37	37	87	95	87	65	102	24	54	112	98	2993
10/16/17	2	2017-11-08	Cage G tail 2	WT	M	131	112	117	136	81	87	72	88	93	80	80	102	85	82	119	82	93	86	87	77	103	71	64	89	107	81	83	46	123	91	2748
10/16/17	2	2017-11-08	Cage G tail 3	WT	M	191	166	160	119	132	140	128	89	123	91	114	115	118	73	96	129	68	61	129	128	111	87	110	152	162	118	126	81	70	104	3491
10/16/17	2	2017-11-08	Cage G tail 4	KI	M	114	122	129	154	101	104	120	125	78	118	119	73	109	94	133	101	90	119	93	77	100	153	128	131	79	110	103	86	115	83	3261
10/16/17	2	2017-11-08	Cage H tail 1	KI	F	267	107	139	180	222	109	133	156	184	176	77	122	152	191	208	150	43	66	135	153	94	119	86	125	125	96	96	139	162	139	4151
10/16/17	2	2017-11-08	Cage H tail 2	WT	F	173	198	141	89	173	136	129	100	138	139	134	87	33	7	93	147	96	96	93	58	43	69	59	23	83	91	87	57	18	19	2809
10/16/17	2	2017-11-08	Cage H tail 3	WT	F	181	226	147	144	130	148	142	114	152	130	87	117	141	119	110	116	103	61	87	113	104	124	102	103	152	143	55	121	153	111	3736
10/16/17	2	2017-11-08	Cage H tail 4	WT	F	194	206	169	181	151	185	169	103	167	123	165	53	116	132	163	128	134	138	108	46	117	98	121	112	161	44	31	133	124	141	3913
10/16/17	2	2017-11-08	Cage I tail 1	WT	F	140	156	140	83	79	110	149	62	85	87	119	103	113	127	107	122	172	134	111	116	120	96	91	93	73	106	74	110	96	119	3293
10/16/17	2	2017-11-08	Cage I tail 2	WT	F	164	162	143	116	104	95	83	112	100	85	114	88	97	86	33	56	77	111	107	89	109	99	63	53	109	91	69	65	34	52	2766
10/16/17	2	2017-11-08	Cage I tail 3	KI	F	124	113	103	112	67	49	97	106	100	83	98	96	76	27	87	123	100	67	14	85	111	144	114	96	92	66	56	84	23	48	2561
10/16/17	2	2017-11-08	Cage I tail 4	KI	F	156	182	159	113	105	135	123	139	68	127	125	150	119	126	123	109	111	119	82	116	107	102	99	119	107	140	116	129	133	73	3612
10/16/17	2	2017-11-08	Cage I tail 5	WT	F	197	184	152	75	120	80	142	132	86	93	79	135	100	77	84	72	162	124	110	123	99	136	187	130	136	140	147	147	111	39	3599
10/16/17	2	2017-11-08	Cage I tail 6	KI	F	139	89	113	67	100	100	93	52	58	84	87	74	68	64	76	100	84	47	66	98	78	122	117	106	27	32	72	67	83	68	2431
10/16/17	2	2017-10-08	Cage J tail 1	WT	M	105	150	87	92	94	90	125	110	56	64	78	97	85	84	61	63	73	83	88	139	103	66	54	48	21	37	63	100	79	84	2479
10/16/17	2	2017-10-08	Cage J tail 2	WT	M	134	98	34	110	92	124	135	141	101	109	112	119	122	67	94	86	98	89	139	119	71	94	95	76	79	85	76	38	72	46	2855
10/16/17	2	2017-10-08	Cage J tail 3	KI	M	140	144	152	165	102	133	104	128	80	118	126	134	122	130	113	120	92	82	95	112	104	105	134	99	116	121	113	60	82	80	3406
10/16/17	2	2017-10-08	Cage J tail 4	WT	M	88	150	131	122	89	77	101	96	128	112	103	99	78	83	85	76	90	78	83	77	85	99	51	60	64	69	82	78	58	85	2677
10/16/17	2	2017-10-08	Cage K tail 1	KI	F	47	109	95	152	134	121	87	123	94	77	104	66	79	95	93	69	59	87	47	78	101	26	81	91	60	34	75	74	81	123	2562
10/16/17	2	2017-10-08	Cage K tail 2	KI	F	119	174	182	125	113	107	72	120	101	93	74	68	73	99	90	108	104	113	100	91	77	42	89	80	44	75	56	27	94	112	2822
10/16/17	2	2017-10-08	Cage K tail 3	KI	F	81	150	170	134	108	118	38	66	102	67	76	102	109	73	94	90	116	80	117	50	54	48	53	88	81	57	11	9	48	116	2506
10/16/17	2	2017-10-08	Cage K tail 4	WT	F	169	132	226	147	113	98	89	172	162	146	89	100	97	172	150	129	144	150	131	112	100	41	120	84	162	126	87	130	92	127	3797
	Stats in SPSS									Stats in SPSS
	Tests of Within-Subjects Effects									Tests of Between-Subjects Effects
	Measure: MEASURE_1									Measure: MEASURE_1
	Source	Type III Sum of Squares	df	Mean Square	F	Sig.				Transformed Variable: Average
	Bin	Sphericity Assumed	282441	29	9739.35	12.368	0			Source	Type III Sum of Squares	df	Mean Square	F	Sig.
	Greenhouse-Geisser	282441	11.945	23644.4	12.368	0				Intercept	1.15785e+07	1	1.15785e+07	1093.85	0
	Huynh-Feldt	282441	22.384	12617.8	12.368	0				Geno	16521.8	1	16521.8	1.561	0.221
	Lower-bound	282441	1	282441	12.368	0.001				SEX	14248.1	1	14248.1	1.346	0.255
	Bin * Geno	Sphericity Assumed	28156	29	970.898	1.233	0.186			Geno * SEX	3177.72	1	3177.72	0.3	0.588
	Greenhouse-Geisser	28156	11.945	2357.07	1.233	0.259				Error	317551	30	10585
	Huynh-Feldt	28156	22.384	1257.85	1.233	0.21
	Lower-bound	28156	1	28156	1.233	0.276
	Bin * SEX	Sphericity Assumed	21140.5	29	728.983	0.926	0.58
	Greenhouse-Geisser	21140.5	11.945	1769.77	0.926	0.521
	Huynh-Feldt	21140.5	22.384	944.432	0.926	0.562
	Lower-bound	21140.5	1	21140.5	0.926	0.344
	Bin * Geno * SEX	Sphericity Assumed	14819.7	29	511.024	0.649	0.924
	Greenhouse-Geisser	14819.7	11.945	1240.62	0.649	0.799
	Huynh-Feldt	14819.7	22.384	662.056	0.649	0.891
	Lower-bound	14819.7	1	14819.7	0.649	0.427
	Error(Bin)	Sphericity Assumed	685104	870	787.476
	Greenhouse-Geisser	685104	358.36	1911.77
	Huynh-Feldt	685104	671.531	1020.21
	Lower-bound	685104	30	22836.8

## Sheet: Figure 4c,d
	Tested under red light, with dim illumination from floor lamps. Tested during the dark phase. Animals in separate cage for 5 mins before testing.
	DATE TESTED	Cohort	Test	Anymaze No.	DOB	SEX	ID	Geno	Stage	Trial	Apparatus	Distance	Center : entries	Center : time	Center : distance	closed 1 : entries	closed 1 : time	closed 1 : distance	closed 2 : entries	closed 2 : time	closed 2 : distance	Open 1 : entries	Open 1 : time	Open 1 : distance	open 2 : entries	open 2 : time	open 2 : distance	Total time open	Total entries open	Total distance open	Total time closed	Total entries closed	Total distance closed	Time ratio	Entries Ratio	Dstance ratio
	2017-06-09	1	1	1	7/18/17	M	Cage A tail 1 WT	WT	test	1	EPM	11.178	19	14.5	0.74	11	120.3	4.289	10	109.7	4.546	1	6	0.099	1	7.9	0.316	13.9	2	0.415	230	21	8.835	0.0569906	0.0869565	0.0448649
	2017-06-09	1	2	2	7/18/17	M	Cage A tail 2 KI	KI	test	1	EPM	9.497	24	26.4	0.844	9	77.4	3.45	8	122.4	4.049	4	9.9	0.128	2	21.5	0.229	31.4	6	0.357	199.8	17	7.499	0.135813	0.26087	0.045443
	2017-06-09	1	3	3	2017-09-07	F	Cage B tail 1 WT	WT	test	1	EPM	13.392	27	27.8	1.038	11	69	3.775	7	69.1	3.489	5	46.4	1.8	7	71.9	2.224	118.3	12	4.024	138.1	18	7.264	0.461388	0.4	0.356485
	2017-06-09	1	4	4	2017-09-07	F	Cage B tail 2 KI	KI	test	1	EPM	8.432	13	24.5	0.504	4	52.8	1.922	4	104.5	2.939	4	42.4	1.065	4	45.9	1.359	88.3	8	2.424	157.3	8	4.861	0.359528	0.5	0.332739
	2017-06-09	1	5	5	6/26/17	M	Cage C tail 1 KI	KI	test	1	EPM	6.71	20	34.6	0.628	6	101.9	2.245	3	44.7	1.402	2	30.9	0.465	6	47.6	1.485	78.5	8	1.95	146.6	9	3.647	0.348734	0.470588	0.348401
	2017-06-09	1	6	6	6/26/17	M	Cage C tail 2 WT	WT	test	1	EPM	9.321	25	44.4	0.8	8	100.6	3.401	7	76.2	3.246	3	13.8	0.262	3	30.4	0.598	44.2	6	0.86	176.8	15	6.647	0.2	0.285714	0.11456
	2017-06-09	1	7	7	2017-12-06	F	Cage D tail 1 WT	WT	test	1	EPM	7.432	18	25.1	0.554	6	92.2	2.908	5	139.8	3.407	3	8.3	0.054	0	0	0	8.3	3	0.054	232	11	6.315	0.0345402	0.214286	0.00847857
	2017-06-09	1	8	8	2017-12-06	F	Cage D tail 2 KI	KI	test	1	EPM	7.928	22	23.9	0.563	7	85	2.58	6	108.2	2.752	3	22.6	0.499	4	29.7	0.748	52.3	7	1.247	193.2	13	5.332	0.213035	0.35	0.189542
	2017-06-09	1	9	9	6/26/18	M	Cage E tail 1 KI	KI	test	1	EPM	8.508	19	23.4	0.573	7	86.6	2.903	6	65.4	2.813	3	33.9	0.552	5	63.9	0.895	97.8	8	1.447	152	13	5.716	0.391513	0.380952	0.20201
	2017-06-09	1	10	10	6/26/18	M	Cage E tail 2 WT	WT	test	1	EPM	11.098	18	22	0.625	6	57.4	2.794	12	96.8	4.638	3	28	0.511	4	57.4	1.382	85.4	7	1.893	154.2	18	7.432	0.356427	0.28	0.203003
	2017-06-09	1	11	11	6/26/18	M	Cage E tail 3 KI	KI	test	1	EPM	10.269	23	21	0.644	8	58.6	3.005	7	90.4	3.389	4	35.3	0.871	4	49.6	1.383	84.9	8	2.254	149	15	6.394	0.362976	0.347826	0.260638
	2017-06-09	1	12	12	6/26/18	M	Cage E tail 4 WT	WT	test	1	EPM	8.596	14	14.6	0.501	5	108.2	2.945	6	117.9	3.21	1	8.3	0.331	4	24	1.038	32.3	5	1.369	226.1	11	6.155	0.125	0.3125	0.181951
	10/18/17	2	1	1	2017-11-08	M	Cage G tail 1	KI	First stage	1	EPM	10.376	6	3.9	0.276	6	114.1	4.155	8	117.1	4.111	1	7.8	0.151	2	15.4	0.541	23.2	3	0.692	231.2	14	8.266	0.091195	0.176471	0.0772494
	10/18/17	2	2	2	2017-11-08	M	Cage G tail 2	WT	First stage	1	EPM	7.039	3	3.8	0.118	3	136.3	2.01	4	90.2	2.405	2	23.8	0.713	2	26.6	1.052	50.4	4	1.765	226.5	7	4.415	0.182015	0.363636	0.285599
	10/18/17	2	3	3	2017-11-08	M	Cage G tail 3	WT	First stage	1	EPM	10.616	8	6.1	0.32	6	121.5	3.567	8	102.9	4.432	1	18.8	0.528	3	21.6	0.632	40.4	4	1.16	224.4	14	7.999	0.152568	0.222222	0.126651
	10/18/17	2	4	4	2017-11-08	M	Cage G tail 4	KI	First stage	1	EPM	9.977	13	28.7	0.551	4	27.6	2.255	5	35	2.408	6	88.3	2.174	5	64.3	1.652	152.6	11	3.826	62.6	9	4.663	0.709108	0.55	0.450701
	10/18/17	2	5	5	2017-11-08	F	Cage H tail 1	KI	First stage	1	EPM	9.909	3	2.2	0.053	8	117	4.841	6	96.5	3.376	2	19.2	0.163	1	13.2	0.061	32.4	3	0.224	213.5	14	8.217	0.131761	0.176471	0.0265371
	10/18/17	2	6	6	2017-11-08	F	Cage H tail 2	WT	First stage	1	EPM	9.698	10	8.4	0.416	7	76.2	4.075	4	83.9	2.532	4	60.3	0.845	3	28.6	0.845	88.9	7	1.69	160.1	11	6.607	0.357028	0.388889	0.203688
	10/18/17	2	7	7	2017-11-08	F	Cage H tail 3	WT	First stage	1	EPM	9.802	10	10.4	0.442	7	102.2	3.775	3	49	1.829	4	47.5	1.333	3	44.2	1.67	91.7	7	3.003	151.2	10	5.604	0.377522	0.411765	0.348902
	10/18/17	2	8	8	2017-11-08	F	Cage H tail 4	WT	First stage	1	EPM	9.427	8	17.5	0.431	7	55.7	3.006	5	100.5	2.987	2	39.1	0.711	4	43.9	1.3	83	6	2.011	156.2	12	5.993	0.34699	0.333333	0.251249
	10/18/17	2	9	9	2017-11-08	F	Cage I tail 1	WT	First stage	1	EPM	11.704	3	6.2	0.142	6	63.3	3.525	9	167.9	5.753	1	3.3	0.058	3	27.4	0.918	30.7	4	0.976	231.2	15	9.278	0.11722	0.210526	0.0951824
	10/18/17	2	10	10	2017-11-08	F	Cage I tail 2	WT	First stage	1	EPM	9.03	3	2.1	0.062	5	85.1	2.861	8	150.4	4.146	1	19.5	0.488	1	4.1	0	23.6	2	0.488	235.5	13	7.007	0.0910845	0.133333	0.0651101
	10/18/17	2	11	11	2017-11-08	F	Cage I tail 3	KI	First stage	1	EPM	7.484	8	4.8	0.206	5	76.3	2.457	7	150.8	2.758	4	18.3	0.6	3	14	0.174	32.3	7	0.774	227.1	12	5.215	0.124518	0.368421	0.129237
	10/18/17	2	12	12	2017-11-08	F	Cage I tail 4	KI	First stage	1	EPM	10.882	5	7.5	0.151	6	126.2	4.777	7	118.7	4.378	1	1.5	0	1	11.7	0.402	13.2	2	0.402	244.9	13	9.155	0.051143	0.133333	0.0420634
	10/18/17	2	13	13	2017-11-08	F	Cage I tail 5	WT	First stage	1	EPM	8.551	8	8.2	0.352	6	141.5	3.681	6	84.5	2.814	1	8.7	0.082	2	25.6	0.813	34.3	3	0.895	226	12	6.495	0.131771	0.2	0.12111
	10/18/17	2	14	14	2017-11-08	F	Cage I tail 6	KI	First stage	1	EPM	8.572	8	9.9	0.358	3	56.3	1.786	11	125.2	3.78	2	25	0.58	2	39.1	1.082	64.1	4	1.662	181.5	14	5.566	0.260993	0.222222	0.229939
	10/18/17	2	15	15	2017-10-08	M	Cage J tail 1	WT	First stage	1	EPM	6.688	3	5	0.149	3	58.6	1.682	5	167.9	3.264	2	9.2	0.125	2	16.5	0.634	25.7	4	0.759	226.5	8	4.946	0.101903	0.333333	0.133041
	10/18/17	2	16	16	2017-10-08	M	Cage J tail 2	WT	First stage	1	EPM	7.478	9	12.3	0.314	4	41.2	2.388	6	193	3.898	0	0	0	1	1.5	0	1.5	1	0	234.2	10	6.286	0.00636402	0.0909091	0
	10/18/17	2	17	17	2017-10-08	M	Cage J tail 3	KI	First stage	1	EPM	13.832	8	6.6	0.303	11	90.6	5.591	11	114.7	5.329	2	2.9	0	4	26	0.833	28.9	6	0.833	205.3	22	10.92	0.123399	0.214286	0.0708755
	10/18/17	2	18	18	2017-10-08	M	Cage J tail 4	WT	First stage	1	EPM	7.746	5	6.9	0.291	5	128	3.04	3	108.7	2.256	1	10.2	0.509	3	22.6	0.934	32.8	4	1.443	236.7	8	5.296	0.121707	0.333333	0.214127
	10/18/17	2	19	19	2017-10-08	F	Cage K tail 1	KI	First stage	1	EPM	7.312	5	5.9	0.203	8	95.7	2.552	3	92.8	2.696	2	32.1	0.657	2	32.8	0.521	64.9	4	1.178	188.5	11	5.248	0.256117	0.266667	0.183318
	10/18/17	2	20	20	2017-10-08	F	Cage K tail 2	KI	First stage	1	EPM	12.183	7	9.9	0.207	6	54.8	3.392	13	118.8	6.296	1	22.1	0.482	2	17.6	0.255	39.7	3	0.737	173.6	19	9.688	0.186123	0.136364	0.0706954
	10/18/17	2	21	21	2017-10-08	F	Cage K tail 3	KI	First stage	1	EPM	8.63	3	4.7	0.17	5	75.8	2.938	3	160.3	4.128	2	9.9	0.11	4	16.2	0.302	26.1	6	0.412	236.1	8	7.066	0.0995423	0.428571	0.0550949
	10/18/17	2	22	22	2017-10-08	F	Cage K tail 4	WT	First stage	1	EPM	9.35	11	14.5	0.61	10	112.6	3.697	8	99.3	3.636	3	15	0.175	2	14.5	0.297	29.5	5	0.472	211.9	18	7.333	0.122204	0.217391	0.0604741
			Sorted										ZONE ENTRY SETTINGS	70% of body in to count
			Geno	SEX	Total time open	Total entries open	Total distance open	Time ratio	Entries Ratio	Dstance ratio				50% of body out for exit																Stats from SPSS
			KI	M	31.4	6	0.357	0.135813	0.26087	0.045443
			KI	F	88.3	8	2.424	0.359528	0.5	0.332739																				Tests of Between-Subjects Effects
			KI	M	78.5	8	1.95	0.348734	0.470588	0.348401																				Dependent Variable: Time_ratio_open
			KI	F	52.3	7	1.247	0.213035	0.35	0.189542																				Source	Type III Sum of Squares	df	Mean Square	F	Sig.
			KI	M	97.8	8	1.447	0.391513	0.380952	0.20201																				Corrected Model	.114a	3	0.038	1.803	0.168
			KI	M	84.9	8	2.254	0.362976	0.347826	0.260638																				Intercept	1.58	1	1.58	74.937	0
			KI	M	23.2	3	0.692	0.091195	0.176471	0.0772494																				Geno	0.033	1	0.033	1.545	0.224
			KI	M	152.6	11	3.826	0.709108	0.55	0.450701																				Sex	0.003	1	0.003	0.16	0.692
			KI	F	32.4	3	0.224	0.131761	0.176471	0.0265371																				Geno * Sex	0.087	1	0.087	4.139	0.051
			KI	F	32.3	7	0.774	0.124518	0.368421	0.129237																				Error	0.632	30	0.021
			KI	F	13.2	2	0.402	0.051143	0.133333	0.0420634																				Total	2.266	34
			KI	F	64.1	4	1.662	0.260993	0.222222	0.229939																				Corrected Total	0.746	33
			KI	M	28.9	6	0.833	0.123399	0.214286	0.0708755																				a. R Squared = .153 (Adjusted R Squared = .068)
			KI	F	64.9	4	1.178	0.256117	0.266667	0.183318
			KI	F	39.7	3	0.737	0.186123	0.136364	0.0706954
			KI	F	26.1	6	0.412	0.0995423	0.428571	0.0550949
			WT	M	13.9	2	0.415	0.0569906	0.0869565	0.0448649
			WT	F	118.3	12	4.024	0.461388	0.4	0.356485
			WT	M	44.2	6	0.86	0.2	0.285714	0.11456
			WT	F	8.3	3	0.054	0.0345402	0.214286	0.00847857
			WT	M	85.4	7	1.893	0.356427	0.28	0.203003
			WT	M	32.3	5	1.369	0.125	0.3125	0.181951
			WT	M	50.4	4	1.765	0.182015	0.363636	0.285599
			WT	M	40.4	4	1.16	0.152568	0.222222	0.126651
			WT	F	88.9	7	1.69	0.357028	0.388889	0.203688
			WT	F	91.7	7	3.003	0.377522	0.411765	0.348902
			WT	F	83	6	2.011	0.34699	0.333333	0.251249
			WT	F	30.7	4	0.976	0.11722	0.210526	0.0951824
			WT	F	23.6	2	0.488	0.0910845	0.133333	0.0651101
			WT	F	34.3	3	0.895	0.131771	0.2	0.12111
			WT	M	25.7	4	0.759	0.101903	0.333333	0.133041
			WT	M	1.5	1	0	0.00636402	0.0909091	0
			WT	M	32.8	4	1.443	0.121707	0.333333	0.214127
			WT	F	29.5	5	0.472	0.122204	0.217391	0.0604741

## Sheet: Figure 4e,f
8_29_17	Y-maze in room B15g
							Sample = 5 mins
							Choice = 2 mins
							ITI = 1 min
		Test (also video number)	Animal	ID	Group	NOVEL arm	Stage	SEX	Trial	Apparatus	Distance (m)	Start : entries	Start : time	Left : entries	Left : time	Right : entries	Right : time	Center : entries	Center : time	TIME NOVELTY RATIO	ENTREIS PREF
	Cohort 1	32	16	Cage B tail 2 KI	KI	L	Test	F	1	Y-maze	5.25	3	6.3	5	48.7	4	50.9	10	9.4	0.488956	0.555556
	Cohort 1	40	20	Cage D tail 2 KI	KI	L	Test	F	1	Y-maze	5.413	2	28.7	4	45.9	4	37.1	9	6.9	0.553012	0.5
	Cohort 1	46	23	Cage E tail 3 KI	KI	L	Test	M	1	Y-maze	5.165	4	63.4	6	43.8	0	0	7	9.9	1	1
	Cohort 2	28	14	Cage I tail 6	KI	L	Test	F	1	Y-maze	3.118	3	85.2	3	32.9	0	0	0	0	1	1
	Cohort 2	34	17	Cage J tail 3	KI	L	Test	M	1	Y-maze	4.571	3	26.4	3	66.5	2	18.3	2	1.3	0.784198	0.6
	Cohort 2	38	19	Cage K tail 1	KI	L	Test	F	1	Y-maze	3.541	3	75.4	3	39.7	0	0	1	0.2	1	1
	Cohort 2	40	20	Cage K tail 2	KI	L	Test	F	1	Y-maze	4.022	4	10.1	5	41.8	2	55.4	3	3.8	0.430041	0.714286
	Cohort 2	42	21	Cage K tail 3	KI	L	Test	F	1	Y-maze	6.165	3	21.1	7	59.2	2	24.5	3	3.8	0.707288	0.777778
	Cohort 1	28	14	Cage A tail 2 KI	KI	R	Test	M	1	Y-maze	4.801	3	34.5	3	8.3	3	68	9	6.1	0.891219	0.5
	Cohort 1	34	17	Cage C tail 1 KI	KI	R	Test	M	1	Y-maze	3.186	2	37.2	3	38.1	2	36.8	6	5.9	0.491322	0.4
	Cohort 1	42	21	Cage E tail 1 KI	KI	R	Test	M	1	Y-maze	3.405	4	55.9	2	11.6	4	44.3	7	3.7	0.792487	0.666667
	Cohort 2	2	1	Cage G tail 1	KI	R	Test	M	1	Y-maze	6.068	3	36.9	3	30.5	4	47.7	0	0	0.609974	0.571429
	Cohort 2	8	4	Cage G tail 4	KI	R	Test	M	1	Y-maze	4.823	4	56.3	1	9.2	4	46.7	2	1.9	0.83542	0.8
	Cohort 2	10	5	Cage H tail 1	KI	R	Test	F	1	Y-maze	5.089	4	76	4	24.2	1	8.8	3	3.1	0.266667	0.2
	Cohort 2	22	11	Cage I tail 3	KI	R	Test	F	1	Y-maze	2.395	1	7.8	3	83	1	19.6	1	2.8	0.191033	0.25
	Cohort 2	24	12	Cage I tail 4	KI	R	Test	F	1	Y-maze	3.131	4	37.3	3	78.9	0	0	0	0	0	0
	Cohort 1	30	15	Cage B tail 1 WT	WT	L	Test	F	1	Y-maze	6.063	3	38.2	4	47.9	4	21.9	10	8.7	0.686246	0.5
	Cohort 1	38	19	Cage D tail 1 WT	WT	L	Test	F	1	Y-maze	3.281	2	77.4	2	24.7	1	11.9	4	4.8	0.674863	0.666667
	Cohort 1	48	24	Cage E tail 4 WT	WT	L	Test	M	1	Y-maze	4.706	4	31.6	3	41.1	4	35.7	9	7.5	0.535156	0.428571
	Cohort 2	20	10	Cage I tail 2	WT	L	Test	F	1	Y-maze	3.376	2	28.1	3	70.7	1	16.4	3	2.4	0.811711	0.75
	Cohort 2	26	13	Cage I tail 5	WT	L	Test	F	1	Y-maze	4.569	2	13.5	4	85.5	1	11.6	2	2.4	0.880536	0.8
	Cohort 2	30	15	Cage J tail 1	WT	L	Test	M	1	Y-maze	3.711	3	30.6	3	63.4	1	17.9	0	0	0.779828	0.75
	Cohort 2	32	16	Cage J tail 2	WT	L	Test	M	1	Y-maze	3.888	4	66.2	3	36.6	1	3.9	3	3.7	0.903704	0.75
	Cohort 2	36	18	Cage J tail 4	WT	L	Test	M	1	Y-maze	3.498	2	32.3	3	49.5	1	29.6	0	0	0.62579	0.75
	Cohort 2	44	22	Cage K tail 4	WT	L	Test	F	1	Y-maze	4.584	2	25.9	3	41.2	2	42.2	3	3	0.494005	0.6
	Cohort 1	26	13	Cage A tail 1 WT	WT	R	Test	M	1	Y-maze	5.867	6	39.3	5	70	0	0	11	7.5	0	0
	Cohort 1	36	18	Cage C tail 2 WT	WT	R	Test	M	1	Y-maze	4.014	2	18.9	2	18.9	10	68	8	5.3	0.782509	0.833333
	Cohort 1	44	22	Cage E tail 2 WT	WT	R	Test	M	1	Y-maze	3.83	2	63.4	2	8.6	5	38.2	6	5.6	0.816239	0.714286
	Cohort 2	4	2	Cage G tail 2	WT	R	Test	M	1	Y-maze	3.499	4	59.1	0	0	2	56.4	0	0	1	1
	Cohort 2	6	3	Cage G tail 3	WT	R	Test	M	1	Y-maze	3.352	2	52.1	2	50.1	2	14	0	0	0.218409	0.5
	Cohort 2	12	6	Cage H tail 2	WT	R	Test	F	1	Y-maze	4.426	2	16.3	3	48.1	3	43.3	1	1.1	0.473742	0.5
	Cohort 2	14	7	Cage H tail 3	WT	R	Test	F	1	Y-maze	6.212	5	60.5	1	4.8	4	46.8	2	0.7	0.906977	0.8
	Cohort 2	16	8	Cage H tail 4	WT	R	Test	F	1	Y-maze	4.683	3	42.5	4	41.1	2	21.5	4	3.5	0.34345	0.333333
	Cohort 2	18	9	Cage I tail 1	WT	R	Test	F	1	Y-maze	5.518	3	39	3	15.1	5	47.7	2	1.3	0.759554	0.625
		Stats from SPSS
		Tests of Between-Subjects Effects
		Dependent Variable: Time_ratio
		Source	Type III Sum of Squares	df	Mean Square	F	Sig.
		Corrected Model	.271a	3	0.09	1.182	0.333
		Intercept	14.049	1	14.049	183.491	0
		Geno	0	1	0	0.004	0.951
		Sex	0.098	1	0.098	1.277	0.267
		Geno * Sex	0.186	1	0.186	2.434	0.129
		Error	2.297	30	0.077
		Total	16.462	34
		Corrected Total	2.568	33
		a. R Squared = .106 (Adjusted R Squared = .016)
