# Supplementary material for: Visualizing synaptic plasticity in vivo by large-scale imaging of endogenous AMPA receptors
Source: eLife. 2021 Oct 18;10:e66809. doi: 10.7554/eLife.66809 (PMC8616579; doi:10.7554/eLife.66809)
Supplement: Figure 5—figure supplement 1—source data 1. [file elife-66809-fig5-figsupp1-data1.xlsx]

## Sheet: Sheet1
	Unstimulated				Stim				Unstimulated				Stim
SEP Before	SEP After	Ratio		SEP Before	SEP After	Ratio		EPSC Before	EPSC After	Ratio		EPSC Before	EPSC After	Ratio
1	0.82	0.82		0.84	0.86	1.02381		65	56	0.861538		45	41	0.911111
0.93	0.91	0.978495		0.79	0.94	1.18987		61	53	0.868852		53	78	1.4717
0.91	0.76	0.835165		0.71	0.82	1.15493		59	48	0.813559		40	65	1.625
0.88	0.89	1.01136		0.68	0.71	1.04412		58	59	1.01724		17	23	1.35294
0.87	0.76	0.873563		0.65	0.8	1.23077		55	72	1.30909		17	29	1.70588
0.81	0.8	0.987654		0.59	0.73	1.23729		54	45	0.833333		33	58	1.75758
0.79	0.7	0.886076		0.57	0.75	1.31579		53	45	0.849057		25	38	1.52
0.75	0.72	0.96		0.53	0.65	1.22642		52	55	1.05769		48	95	1.97917
0.74	0.73	0.986486		0.39	0.57	1.46154		52	48	0.923077		28	48	1.71429
0.72	0.67	0.930556		0.21	0.44	2.09524		51	38	0.745098		18	56	3.11111
0.7	0.62	0.885714						48	52	1.08333
0.69	0.58	0.84058						48	43	0.895833
0.66	0.68	1.0303						46	36	0.782609
0.65	0.67	1.03077						45	36	0.8
0.62	0.57	0.919355						44	44	1
0.6	0.57	0.95						40	33	0.825
0.56	0.63	1.125						39	30	0.769231
0.53	0.48	0.90566						37	38	1.02703
0.53	0.5	0.943396						36	28	0.777778
0.48	0.53	1.10417						34	26	0.764706
0.46	0.39	0.847826						33	24	0.727273
0.45	0.44	0.977778						32	36	1.125
0.41	0.34	0.829268						29	28	0.965517
0.4	0.42	1.05						28	27	0.964286
0.38	0.3	0.789474						26	31	1.19231
0.37	0.39	1.05405						25	28	1.12
0.35	0.28	0.8						24	18	0.75
0.32	0.39	1.21875						21	22	1.04762
0.31	0.28	0.903226						19	9	0.473684
0.29	0.27	0.931034						18	16	0.888889
0.29	0.25	0.862069						17	16	0.941176
0.28	0.39	1.39286						15	13	0.866667
0.25	0.25	1						13	14	1.07692
0.24	0.25	1.04167						12	9	0.75
0.23	0.24	1.04348						12	10	0.833333
0.22	0.31	1.40909						11	13	1.18182
0.21	0.19	0.904762						11	12	1.09091
0.17	0.12	0.705882						10	7	0.7
0.15	0.22	1.46667						9	7	0.777778
0.14	0.16	1.14286						9	11	1.22222
0.13	0.14	1.07692						7	13	1.85714
