# Supplementary material for: Visualizing synaptic plasticity in vivo by large-scale imaging of endogenous AMPA receptors
Source: eLife. 2021 Oct 18;10:e66809. doi: 10.7554/eLife.66809 (PMC8616579; doi:10.7554/eLife.66809)
Supplement: Figure 5—source data 1. [file elife-66809-fig5-data1.xlsx]

## Sheet: Fig 5b
	raw EPSC	baseline adjusted
time (ms)	amp (pA)	amp (pA)
0	1.22122	3.90608
0.0999756	-3.90573	-1.22087
0.199982	-2.9194	-0.234544		1 ms uncaging, onset a 5 ms
0.299988	-2.01364	0.671218
0.399994	-1.88669	0.798171		axes are EPSC amp (pA) vs. time (ms)
0.5	-4.82126	-2.1364
0.599976	-9.7651	-7.08025
0.699982	-1.7695	0.915359
0.799988	1.89261	4.57747
0.899994	-2.92917	-0.244309
1	0.183626	2.86848
1.09998	-0.722136	1.96272
1.19998	-1.7695	0.915359
1.29999	-1.34225	1.3426
1.39999	-0.548796	2.13606
1.5	-10.3144	-7.62956
1.59998	-2.43112	0.253738
1.69998	-1.09811	1.58675
1.79999	-6.77438	-4.08952
1.89999	-0.825652	1.85921
2	-3.90573	-1.22087
2.09998	1.02884	3.7137
2.19998	-4.45505	-1.77019
2.29999	-4.82126	-2.1364
2.39999	-2.9902	-0.305345
2.5	0.671907	3.35676
2.59998	-8.63376	-5.9489
2.69998	-1.64743	1.03743
2.79999	-5.61471	-2.92986
2.89999	2.0054	4.69026
3	-1.22018	1.46468
3.09998	-6.19235	-3.50749
3.19998	-1.64743	1.03743
3.29999	-2.8071	-0.122239
3.39999	-3.23434	-0.549485
3.5	1.95365	4.6385
3.59998	-3.84469	-1.15984
3.69998	-3.41745	-0.732591
3.79999	-7.19777	-4.51291
3.89999	1.28226	3.96712
4	-6.54982	-3.86496
4.09998	-2.54391	0.140945
4.19998	-0.872527	1.81233
4.29999	-6.71876	-4.03391
4.39999	-3.47848	-0.793626
4.5	-1.2153	1.46956
4.59998	-3.04635	-0.361497
4.69998	1.40433	4.08919
4.79999	-2.06491	0.619948
4.89999	-5.47023	-2.78537
5	0.855012	3.53987
5.09998	-7.3237	-4.63884
5.19998	-1.68014	1.00471
5.29999	0.845735	3.53059
5.39999	-3.74118	-1.05632
5.5	-10.0703	-7.38542
5.59998	-16.479	-13.7941
5.69998	-22.0942	-19.4093
5.79999	-36.0102	-33.3254
5.89999	-34.6064	-31.9215
6	-47.79	-45.1051
6.09998	-68.2978	-65.613
6.19998	-69.2133	-66.5285
6.29999	-65.6123	-62.9274
6.39999	-77.6362	-74.9513
6.5	-85.3266	-82.6418
6.59998	-85.7539	-83.069
6.69998	-97.0454	-94.3605
6.79999	-97.4116	-94.7267
6.89999	-96.5571	-93.8722
7	-89.8432	-87.1584
7.09998	-83.8007	-81.1159
7.19998	-93.1391	-90.4543
7.29999	-95.0312	-92.3464
7.39999	-92.895	-90.2101
7.5	-98.0219	-95.3371
7.59998	-94.8481	-92.1632
7.69998	-94.665	-91.9801
7.79999	-85.0214	-82.3366
7.89999	-92.2846	-89.5998
8	-94.1157	-91.4308
8.09998	-79.1621	-76.4772
8.19998	-80.8711	-78.1862
8.29999	-79.8945	-77.2096
8.39999	-86.059	-83.3742
8.5	-77.2089	-74.5241
8.59998	-71.7768	-69.092
8.69998	-77.5752	-74.8903
8.79999	-68.603	-65.9181
8.89999	-78.5517	-75.8669
9	-77.27	-74.5851
9.09998	-73.2417	-70.5568
9.19998	-73.791	-71.1061
9.29999	-64.5136	-61.8288
9.39999	-63.354	-60.6691
9.5	-55.6635	-52.9787
9.59998	-55.4804	-52.7956
9.69998	-63.476	-60.7912
9.79999	-55.4804	-52.7956
9.89999	-56.9453	-54.2604
10	-42.2968	-39.612
10.1	-45.4096	-42.7248
10.2	-45.2876	-42.6027
10.3	-42.7241	-40.0392
10.4	-44.8603	-42.1755
10.5	-44.7993	-42.1144
10.6	-38.2685	-35.5837
10.7	-48.0341	-45.3493
10.8	-29.9067	-27.2218
10.9	-40.5879	-37.903
11	-37.4751	-34.7902
11.1	-39.5503	-36.8654
11.2	-33.935	-31.2502
11.3	-31.1274	-28.4425
11.4	-29.9677	-27.2829
11.5	-21.4228	-18.738
11.6	-32.7143	-30.0295
11.7	-34.3012	-31.6164
11.8	-34.6674	-31.9826
11.9	-31.9819	-29.297
12	-32.4091	-29.7243
12.1	-23.2539	-20.569
12.2	-15.3193	-12.6344
12.3	-22.1552	-19.4704
12.4	-25.268	-22.5832
12.5	-26.5498	-23.8649
12.6	-25.9394	-23.2546
12.7	-23.0097	-20.3249
12.8	-15.5591	-12.8742
12.9	-17.4555	-14.7707
13	-17.0283	-14.3434
13.1	-9.40866	-6.7238
13.2	-11.5449	-8.86003
13.3	-1.51124	1.17361
13.4	-9.83591	-7.15105
13.5	-15.583	-12.8981
13.6	-8.91158	-6.22672
13.7	-16.977	-14.2922
13.8	-9.23531	-6.55045
13.9	-6.3901	-3.70524
14	-9.89694	-7.21208
14.1	-13.2353	-10.5505
14.2	-7.46529	-4.78043
14.3	-10.7514	-8.06657
14.4	-7.08932	-4.40447
14.5	-13.3759	-10.6911
14.6	-5.44137	-2.75652
14.7	-4.95309	-2.26824
14.8	-3.48825	-0.803391
14.9	-7.94382	-5.25896
15	-9.10348	-6.41863
15.1	1.4556	4.14046
15.2	-8.37106	-5.6862
15.3	-1.71823	0.966628
15.4	-6.41794	-3.73308
15.5	-9.03805	-6.35319
15.6	-6.88766	-4.20281
15.7	-3.97653	-1.29167
15.8	-0.680632	2.00423
15.9	3.95804	6.6429
16	1.81253	4.49739
16.1	-3.55856	-0.873704
16.2	-6.30514	-3.62029
16.3	-2.03268	0.652175
16.4	1.81253	4.49739
16.5	3.03323	5.71809
16.6	-1.23923	1.44563
16.7	-8.56344	-5.87859
16.8	-10.2114	-7.52654
16.9	-6.79343	-4.10857
17	-0.628874	2.05598
17.1	-8.92966	-6.2448
17.2	-0.873015	1.81184
17.3	-10.2724	-7.58757
17.4	1.69046	4.37532
17.5	-0.628874	2.05598
17.6	0.568391	3.25325
17.7	-2.97165	-0.28679
17.8	-4.19235	-1.50749
17.9	3.74222	6.42708
18	-1.81198	0.872878
18.1	-6.8779	-4.19304
18.2	4.0474	6.73225
18.3	1.60599	4.29085
18.4	-8.52585	-5.84099
18.5	-0.102995	2.58186
18.6	1.36185	4.04671
18.7	0.230501	2.91536
18.8	1.85013	4.53499
18.9	-1.05124	1.63362
19	0.474641	3.1595
19.1	-1.3237	1.36116
19.2	-0.459441	2.22542
19.3	0.507356	3.19221
19.4	0.0190748	2.70393
19.5	-3.582	-0.897141
19.6	-6.09421	-3.40935
19.7	0.033235	2.71809
19.8	1.37601	4.06087
19.9	-0.670867	2.01399
20	-2.03708	0.64778
20.1	0.0942702	2.77913
20.2	-5.582	-2.89714
20.3	1.68118	4.36604
20.4	-7.22995	-4.54509
20.5	1.80325	4.48811
20.6	-3.07956	-0.3947
20.7	-4.66647	-1.98161
20.8	-0.0278002	2.65706
20.9	-7.22995	-4.54509
21	0.643587	3.32844
21.1	-8.26755	-5.58269
21.2	-9.30514	-6.62029
21.3	-0.0888353	2.59602
21.4	-2.2861	0.398757
21.5	-0.304656	2.3802
21.6	1.86429	4.54915
21.7	-6.86374	-4.17888
21.8	-1.49264	1.19221
21.9	1.22122	3.90608
22	-0.12155	2.56331
22.1	-3.14059	-0.455735
22.2	-1.41257	1.27229

## Sheet: Imaging
20180420_cell1
Time 1	Area	Total
Green	432	84.535				432	27.701				234	43.12				234	13.944				477	53.136				477	19.312				166	47.825				166	26.47				151	42.219				151	25.132
Red	432	64.231				432	2.171				234	21.474				234	2.145				477	26.65				477	2.273				166	15.114				166	2.048				151	18.013				151	2.437
Time 2	Area	Total
Green	432	84.29	9	503	1	432	19.924	7	116	1	234	43.26	8	244	1	234	16.986	8	120	1	477	47.35	6	314	1	477	14.168	8	111	1	166	42.052	10	227	1	166	19.55	8	94	1	151	42.176	6	151	1	151	20.366	9	121
Red	432	73.814	5	368	2	432	1.541	1	6	2	234	29.6607	3	113	2	234	1.57267	1	5	2	477	34.126	2	177	2	477	2.156	1	31	2	166	18.956	2	95	2	166	1.60267	1	7	2	151	19.448	2	97	2	151	1.66867	1	6
Time 3	Area	Total
Green	432	101.197	10	372	1	432	27.505	8	97	1	456	44.121	7	198	1	456	20.399	8	102	1	477	60.889	10	226	1	477	19.688	9	75	1	390	43.018	9	153	1	390	27.595	9	103	1	151	51.464	11	180	1	151	28.278	9	99
Red	432	68.699	6	326	2	432	2.025	1	7	2	456	26.261	2	83	2	456	2.156	1	6	2	477	44.551	3	163	2	477	2.585	1	13	2	390	15.99	1	70	2	390	2.205	1	6	2	151	29.828	3	107	2	151	2.305	1	6
Time 4	Area	Total
Green	432	65.204	10	254	1	432	23.174	9	96	1	456	30.509	5	161	1	456	19.279	6	101	1	477	49.132	10	264	1	477	19.262	8	73	1	390	51.097	10	183	1	390	24.108	8	85	1	151	42.305	11	156	1	151	24.298	10	90
Red	432	59.167	2	220	2	432	2.218	1	5	2	456	14.811	1	64	2	456	2.037	1	6	2	477	36.593	2	152	2	477	2.832	1	18	2	390	11.354	1	75	2	390	2.149	1	6	2	151	19.477	2	69	2	151	2.351	1	4
Time 5	Area	Total
Green	432	103.514	12	387	1	432	33.81	7	103	1	456	44.467	8	199	1	456	26.298	7	153	1	477	67.52	7	286	1	477	21.075	8	121	1	390	65.921	13	294	1	390	31.592	8	144	1	151	74.146	10	161	1	151	46.868	8	190
Red	432	56.139	5	283	2	432	2.192	1	6	2	456	22.447	1	118	2	456	2.164	1	8	2	477	47.203	3	167	2	477	3.229	1	27	2	390	17.064	2	89	2	390	2.218	1	7	2	151	19.768	1	75	2	151	3.252	1	15
Time 6	Area	Total
Green	432	98.613	6	411	1	432	33.271	5	169	1	456	40.094	7	219	1	456	26.474	7	122	1	477	67.719	8	308	1	477	23.184	10	101	1	390	72.397	7	328	1	390	42.541	9	179	1	151	62.98	8	149	1	151	41.119	9	117
Red	432	61.713	6	260	2	432	2.375	1	9	2	456	28.397	2	100	2	456	2.217	1	6	2	477	47.564	2	202	2	477	3.553	1	23	2	390	20.438	1	127	2	390	2.246	1	7	2	151	21.523	2	79	2	151	2.338	1	6
Time 7	Area	Total
Green	432	97.47	10	384	1	432	30.38	8	143	1	456	44.917	8	279	1	456	24.89	8	130	1	477	67.463	7	288	1	477	20.43	6	101	1	390	74.782	8	255	1	390	33.841	6	216	1	151	53.252	10	200	1	151	41.656	9	136
Red	432	54.63	5	241	2	432	2.294	1	7	2	456	32.386	1	121	2	456	2.208	1	6	2	477	49.426	2	226	2	477	3.925	1	24	2	390	24.538	1	117	2	390	2.362	1	6	2	151	17.934	2	86	2	151	2.497	1	6
Time 8	Area	Total
Green	432	86.662	10	333	1	432	29.549	7	125	1	456	47.958	7	204	1	456	24.746	8	137	1	477	81.398	7	517	1	477	21	9	100	1	390	61.81	10	298	1	390	29.941	9	192	1	151	59.682	9	151	1	151	39.033	9	108
Red	432	67.28	3	194	2	432	2.317	1	6	2	456	27.463	1	126	2	456	2.257	1	6	2	477	59.398	2	255	2	477	3.901	1	21	2	390	22.318	1	175	2	390	2.323	1	11	2	151	10.245	2	67	2	151	2.291	1	5
Time 9	Area	Total
Green	432	86.308	8	327	1	432	29.269	7	137	1	456	43.912	8	287	1	456	23.787	8	111	1	477	61.279	9	338	1	477	20.906	8	128	1	390	73.485	10	258	1	390	37.2	9	230	1	151	61.815	11	126	1	151	52.199	9	190
Red	432	61.773	2	192	2	432	2.252	1	9	2	456	23.329	1	129	2	456	2.261	1	6	2	477	48.646	2	231	2	477	3.646	1	21	2	390	22.356	1	185	2	390	2.231	1	8	2	151	10.325	1	65	2	151	2.55	1	8
		-10	-5	0	10	20	30	40	50	60
Time 1	Spine	1	2	3	4	5	6	7
	Green	33.824	17.087	56.834	29.176	69.604	93.538	21.355
	Red	24.377	15.576	62.06	19.329	41.356	66.508	13.066
Time 2	Spine	1	2	3	4	5	6	7
	Green	33.182	21.81	64.366	26.274	74.7667	86.5267	22.502
	Red	31.97	17.7793	72.273	28.088	43.3147	78.905	17.3533
Time 3	Spine	1	2	3	4	5	6	7
	Green	41.201	23.186	73.692	23.722	60.933	83.244	15.423
	Red	41.966	27.523	66.674	24.105	29.652	77.908	13.785
Time 4	Spine	1	2	3	4	5	6	7
	Green	29.87	18.007	42.03	11.23	72.002	76.252	26.989
	Red	33.761	17.126	56.949	12.774	41.273	78.635	9.205
Time 5	Spine	1	2	3	4	5	6	7
	Green	46.445	27.278	69.704	18.169	93.135	78.559	34.329
	Red	43.974	16.516	53.947	20.283	46.62	91.681	14.846
Time 6	Spine	1	2	3	4	5	6	7
	Green	44.535	21.861	65.342	13.62	98.637	63.134	29.856
	Red	44.011	19.185	59.338	26.18	58.087	76.311	18.192
Time 7	Spine	1	2	3	4	5	6	7
	Green	47.033	11.596	67.09	20.027	82.583	60.29	40.941
	Red	45.501	15.437	52.336	30.178	65.278	75.004	22.176
Time 8	Spine	1	2	3	4	5	6	7
	Green	60.398	20.649	57.113	23.212	95.761	64.537	31.869
	Red	55.497	7.954	64.963	25.206	49.992	68.21	19.995
Time 9	Spine	1	2	3	4	5	6	7
	Green	40.373	9.616	57.039	20.125	98.074	63.652	36.285
	Red	45	7.775	59.521	21.068	64.656	64.348	20.125
[truncated: 21 more columns]

## Sheet: uEPSC
20180420_cell1
time	spine 1	spine 2	spine 3	spine 4	spine 5	spine 6	spine 7			spine 1	spine 2	spine 3	spine 4	spine 5	spine 6	spine 7		spine 1	spine 2	spine 3	spine 4	spine 5	spine 6	spine 7
-12	-42.88	-9.38	-52.36	-10.52	-60.59	-70.14	-37.04		baseline	-41.86	-10.7814	-46.4257	-7.66286	-60.4014	-71.5014	-35.0857		2.2098	1.19156	5.04616	2.07761	2.4394	2.61758	2.38232
-10	-44	-11.57	-51.2	-8.7	-61.39	-71.93	-36.12		0-10	-39.7571	-9.16571	-49.54	-7.39143	-62.2314	-72.0771	-38.3714		2.25266	2.86341	3.7106	1.10712	5.28377	3.46241	5.12353
-8	-43.64	-9.59	-49.66	-5.54	-58.67	-73.14	-35.04		10-20	-40.6314	-9.25571	-46.5	-7.94857	-72.8929	-63.5757	-50.5886		3.08892	2.37591	2.77758	1.6575	6.12703	4.05046	6.06339
-7	-37.79	-10.49	-40.14	-9.5	-64.28	-76	-38.52		20-30	-40.1557	-7.46857	-47.94	-7.23714	-78.31	-63.2157	-54.6286		2.52359	1.51658	3.14996	1.0216	3.03029	3.14161	3.9212
-5	-40.13	-11.57	-47.84	-6.02	-60.03	-70.06	-33		30-40 min	-40.5671	-8.48429	-47.52	-8.91714	-78.1043	-60.4314	-55.7086		1.77692	1.80951	3.86268	1.66447	4.39443	2.9826	3.45344
-3	-41.75	-10.22	-40.98	-5.24	-61.39	-67.75	-34.32		0
-1	-42.83	-12.65	-42.8	-8.12	-56.46	-71.49	-31.56		sd
2	-37.7	-12.83	-45.32	-7.04	-66.66	-71.05	-35.16		p	0.136929	0.103575	0.36453	0.121017	1.56579e-07	5.11428e-06	1.67253e-09
3	-39.41	-9.05	-53.86	-6.68	-56.63	-75.45	-32.48
4	-38.15	-11.57	-47.98	-6.5	-56.63	-75.78	-33.48
5	-42.29	-9.59	-48.26	-9.68	-63.09	-66.98	-40.32			spine 1	spine 2	spine 3	spine 4	spine 5	spine 6	spine 7
7	-39.32	-10.31	-52.88	-7.34	-57.65	-74.46	-47.12		% baseline	96.9115	78.6935	102.357	116.368	129.309	84.5178	158.779
9	-37.97	-5.72	-53.16	-7.82	-69.52	-72.48	-41.2			4.3802	21.3278	8.12853	18.6659	5.62636	4.93551	6.19912
10	-43.46	-5.09	-45.32	-6.68	-65.44	-68.34	-38.84
12	-41.57	-12.92	-42.94	-8.18	-67.65	-70.5	-41.2
13	-38.96	-9.95	-50.92	-9.32	-75.44	-65.23	-45.28
14	-42.92	-9.41	-47	-8.48	-65.1	-63.91	-51.92
16	-43.46	-8.06	-45.6	-5.06	-68.16	-65.01	-49.32
17	-43.73	-10.31	-43.5	-9.38	-80.37	-62.64	-52.36
19	-38.06	-5.09	-47.14	-6.26	-73.43	-59.33	-54.28
20	-35.72	-9.05	-48.4	-8.96	-80.1	-58.41	-59.76
22	-41.84	-9.5	-47.56	-6.56	-79.62	-65.34	-54.2
23	-42.74	-9.05	-53.58	-7.34	-73.16	-62.37	-58.92
24	-37.97	-7.7	-50.92	-5.78	-79.79	-66.98	-49.04
26	-35.72	-5.63	-45.6	-7.1	-77.24	-64.57	-55.68
27	-39.68	-6.26	-45.6	-6.8	-82.55	-58.96	-58.92
29	-41.66	-8.06	-47	-8.72	-76.29	-59.18	-49.96
30	-41.48	-6.08	-45.32	-8.36	-79.52	-65.11	-55.68
32	-42.74	-7.79	-45.32	-10.58	-86.15	-62.62	-50.6
33	-40.22	-10.13	-45.46	-9.92	-73.4	-56.84	-59.32
34	-40.22	-8.15	-43.92	-6.98	-79.57	-62.73	-54.16
36	-40.67	-9.5	-50.78	-10.7	-74.59	-64.46	-54.56
37	-42.83	-11.03	-43.5	-8.42	-77.14	-60.06	-58.36
39	-37.79	-6.62	-50.5	-9.26	-80.54	-59.51	-53.28
40	-39.5	-6.17	-53.16	-6.56	-75.34	-56.8	-59.68

## Sheet: -10
20180420_c1
raw								filter
time	spine 1	spine 2	spine 3	spine 4	spine 5	spine 6		time	spine 1	spine 2	spine 3	spine 4	spine 5	spine 6
0	3.09968	0.901212	3.09259	3.11739	-4.03511	6.20991		0	5.86326	1.77374	-0.232042	1.66606	-1.83561	2.05597
0.100006	3.81875	0.236329	0.76414	1.32087	-2.99488	5.11315		0.100006	5.59995	1.9863	0.166096	2.29669	-2.24204	2.14023
0.200012	4.9114	0.152208	-1.26284	-0.116069	-1.78059	3.32261		0.200012	5.15621	2.12513	0.563661	2.83371	-2.76219	2.23325
0.300003	6.10253	0.59628	-2.54578	-0.901792	-0.747616	1.44029		0.300003	4.6007	2.17313	0.933566	3.17811	-3.33003	2.26916
0.400009	7.10154	1.3709	-2.82546	-0.86731	-0.156287	0.0537453		0.400009	4.02276	2.12134	1.26323	3.28556	-3.87467	2.19781
0.5	7.67828	2.23594	-2.12081	0.0586326	-0.155715	-0.47098		0.5	3.50464	1.97351	1.54487	3.17143	-4.34266	1.98816
0.600006	7.67127	3.00412	-0.714812	1.82119	-0.795869	-0.100167		0.600006	3.10015	1.7497	1.77401	2.89737	-4.71281	1.63022
0.700012	6.95056	3.57345	0.977545	4.13514	-2.0439	0.893044		0.700012	2.82686	1.48463	1.95626	2.54688	-4.99401	1.13382
0.800003	5.43532	3.8932	2.54704	6.42648	-3.81057	2.04213		0.800003	2.67156	1.22006	2.11127	2.19988	-5.21094	0.528125
0.900009	3.23013	3.89938	3.74934	7.97236	-5.89985	2.89854		0.900009	2.57195	0.997417	2.21782	1.84243	-5.4692	-0.512286
1	0.718887	3.51339	4.53931	8.20391	-7.96373	3.16343		1	2.4725	0.85088	2.50574	1.65171	-5.78667	-1.56541
1.10001	-1.5099	2.70112	5.00252	6.96655	-9.57627	2.66419		1.10001	2.31636	0.760508	2.97114	1.61658	-6.17961	-2.51349
1.20001	-2.91261	1.49996	5.21916	4.57488	-10.4104	1.34166		1.20001	2.06457	0.693008	3.56206	1.68704	-6.63855	-3.27369
1.3	-3.23093	0.0517023	5.20619	1.68779	-10.4265	-0.737253		1.3	1.70221	0.612878	4.18936	1.79096	-7.13795	-3.81788
1.40001	-2.56269	-1.38369	4.98206	-0.939422	-9.89481	-3.38101		1.40001	1.23898	0.49073	4.75347	1.84612	-7.64525	-4.17362
1.5	-1.2725	-2.49133	4.69003	-2.71046	-9.21203	-6.31218		1.5	0.711644	0.305985	5.17391	1.77275	-8.1278	-4.40559
1.60001	0.186747	-3.01308	4.59132	-3.3522	-8.68191	-9.16299		1.60001	0.184322	0.0453169	5.40818	1.50998	-8.55326	-4.58802
1.70001	1.40638	-2.88377	4.90399	-2.95923	-8.42557	-11.4771		1.70001	-0.260057	-0.298746	5.45679	1.03492	-8.88467	-4.77875
1.8	2.12808	-2.25481	5.65882	-1.92139	-8.39179	-12.7899		1.8	-0.540588	-0.727773	5.35378	0.375285	-9.08224	-5.00758
1.90001	2.25694	-1.38412	6.64897	-0.713205	-8.46052	-12.7947		1.90001	-0.604906	-1.23476	5.15055	-0.395774	-9.11649	-5.27337
2	1.8221	-0.551221	7.4998	0.295906	-8.54965	-11.4832		2	-0.451279	-1.80011	4.90118	-1.18112	-8.98604	-5.54517
2.10001	0.941466	0.00868507	7.83866	0.899357	-8.646	-9.19749		2.10001	-0.134866	-2.38483	4.65415	-1.88489	-8.72721	-5.77092
2.20001	-0.196563	0.159424	7.46906	0.996375	-8.77982	-6.51853		2.20001	0.246448	-2.9315	4.44787	-2.43382	-8.40121	-5.89032
2.3	-1.29348	-0.136541	6.43261	0.573986	-8.99932	-4.04361		2.3	0.580637	-3.37904	4.3079	-2.79222	-8.06699	-5.84537
2.40001	-2.01392	-0.857905	4.9602	-0.332008	-9.27672	-2.20822		2.40001	0.77601	-3.68623	4.23974	-2.96778	-7.75927	-5.58848
2.5	-2.11913	-1.95587	3.37334	-1.6495	-9.44454	-1.2004		2.5	0.78749	-3.85259	4.22381	-3.0064	-7.48392	-5.09301
2.60001	-1.53889	-3.39409	1.99819	-3.2415	-9.25861	-0.991578		2.60001	0.625499	-3.92204	4.21957	-2.97667	-7.22595	-4.36796
2.70001	-0.374516	-5.10534	1.08448	-4.90409	-8.54596	-1.3549		2.70001	0.344335	-3.96707	4.17731	-2.94929	-6.96236	-3.47089
2.8	1.10177	-6.90983	0.763256	-6.38432	-7.35848	-1.95647		2.8	0.0196837	-4.06303	4.05318	-2.97956	-6.67127	-2.50583
2.90001	2.46641	-8.44028	1.01957	-7.38918	-6.01036	-2.49609		2.90001	-0.273956	-4.26238	3.82256	-3.09867	-6.33635	-1.60146
3	3.2514	-9.24177	1.6994	-7.64414	-4.88447	-2.76709		3	-0.479132	-4.57861	3.48908	-3.3105	-5.94694	-0.874872
3.10001	3.11852	-8.9919	2.60257	-7.03218	-4.21307	-2.61685		3.10001	-0.563417	-4.98597	3.08565	-3.59059	-5.49712	-0.396632
3.20001	2.04886	-7.71347	3.53131	-5.69493	-3.98088	-1.94507		3.20001	-0.524935	-5.43114	2.66791	-3.89382	-4.98619	-0.174969
3.3	0.381905	-5.84129	4.32055	-4.00877	-4.00088	-0.739996		3.3	-0.392112	-5.84814	2.30151	-4.16345	-4.4253	-0.163916
3.40001	-1.34747	-4.06431	4.83193	-2.4538	-4.04005	0.848815		3.40001	-0.216934	-6.17038	2.04499	-4.33664	-3.84496	-0.286934
3.5	-2.65171	-3.02041	4.94034	-1.45596	-3.91081	2.46026		3.5	-0.0649676	-6.33648	1.93251	-4.35115	-3.29441	-0.462976
3.60001	-3.26213	-3.01535	4.53874	-1.22779	-3.51191	3.61138		3.60001	-0.00518582	-6.29745	1.96361	-4.15591	-2.83221	-0.627172
3.70001	-3.16977	-3.9402	3.57937	-1.72889	-2.85611	3.89106		3.70001	-0.0941673	-6.02963	2.10369	-3.72543	-2.51028	-0.742281
3.8	-2.54653	-5.36728	2.16944	-2.70176	-2.02598	3.15444		3.8	-0.352855	-5.55077	2.29482	-3.07723	-2.35647	-0.797875
3.90001	-1.62942	-6.76566	0.610839	-3.76517	-1.13296	1.61156		3.90001	-0.750085	-4.92808	2.47246	-2.28081	-2.36574	-0.801238
4	-0.639272	-7.70438	-0.66899	-4.58103	-0.313497	-0.275347		4	-1.20597	-4.26772	2.57919	-1.44622	-2.50362	-0.772436
4.10001	0.244057	-7.94689	-1.26859	-4.91565	0.258392	-2.02032		4.10001	-1.61977	-3.68567	2.57495	-0.693104	-2.71801	-0.743963
4.20001	0.858909	-7.43395	-0.987647	-4.59378	0.421284	-3.29169		4.20001	-1.90778	-3.27192	2.44232	-0.114156	-2.95285	-0.759502
4.3	1.04453	-6.21778	0.0861588	-3.48812	0.100726	-3.98429		4.3	-2.03101	-3.06205	2.18901	0.251794	-3.15993	-0.86606
4.40001	0.641774	-4.44193	1.61309	-1.58492	-0.688468	-4.14623		4.40001	-2.0003	-3.02851	1.84806	0.427832	-3.30816	-1.09709
4.5	-0.410918	-2.35692	3.14465	0.93377	-1.88565	-3.91331		4.5	-1.86122	-3.09451	1.47659	0.48525	-3.38888	-1.45401
4.60001	-1.93128	-0.299528	4.26871	3.63012	-3.39563	-3.4412		4.60001	-1.67283	-3.16395	1.14832	0.517505	-3.41426	-1.89819
4.70001	-3.50152	1.34384	4.71933	5.89501	-5.04204	-2.82425		4.70001	-1.48919	-3.15507	0.936794	0.609894	-3.41322	-2.36144
4.8	-4.63147	2.23421	4.41699	7.15585	-6.55717	-2.12721		4.8	-1.34888	-3.02455	0.896387	0.813189	-3.42336	-2.7702
4.90001	-4.98574	2.18139	3.4592	7.10812	-7.62548	-1.46102		4.90001	-1.27031	-2.77441	1.04505	1.13453	-3.48043	-3.06897
5	-4.51431	1.19247	2.06584	5.83335	-7.99311	-1.00416		5	-1.2496	-2.44386	1.35387	1.54361	-3.60484	-3.23444
5.10001	-3.44233	-0.496478	0.525623	3.76736	-7.56035	-0.962672		5.10001	-1.26124	-2.09209	1.75133	1.98399	-3.79223	-3.27675
5.20001	-2.12964	-2.45019	-0.855679	1.53667	-6.43075	-1.46731		5.20001	-1.26169	-1.78162	2.1427	2.38372	-4.01526	-3.23111
5.3	-0.897841	-4.13731	-1.77634	-0.251688	-4.88409	-2.45622		5.3	-1.19601	-1.56497	2.44004	2.6655	-4.22955	-3.14539
5.40001	0.0329122	-5.12069	-2.00122	-1.18055	-3.28764	-3.65999		5.40001	-1.00849	-1.47305	2.58733	2.76008	-4.38085	-3.06694
5.5	0.575247	-5.21633	-1.42648	-1.13116	-2.00831	-4.72087		5.5	-0.660977	-1.50922	2.57274	2.62413	-4.41379	-3.03331
5.60001	0.755866	-4.5468	-0.0760826	-0.309148	-1.30532	-5.3373		5.60001	-0.148943	-1.64886	2.42548	2.25808	-4.28535	-3.07111
5.70001	0.696438	-3.45214	1.85836	0.881846	-1.28368	-5.3545		5.70001	0.490486	-1.84462	2.20335	1.71523	-3.98047	-3.19576
5.8	0.596162	-2.32756	3.98132	2.03863	-1.85664	-4.83317		5.8	1.18636	-2.0342	1.97537	1.09416	-3.5238	-3.40958
5.90001	0.660953	-1.45384	5.76919	2.89261	-2.76434	-4.01104		5.90001	1.85395	-2.1474	1.80593	0.513468	-2.97797	-3.69805
6	1.03701	-0.939731	6.73941	3.3073	-3.69067	-3.20837		6	2.41841	-2.11842	1.74158	0.0750357	-2.42857	-4.02522
6.10001	1.75835	-0.758816	6.66781	3.20548	-4.3315	-2.68909		6.10001	2.8324	-1.90529	1.80048	-0.166694	-1.9587	-4.33438
6.20001	2.77682	-0.79436	5.64868	2.54156	-4.45774	-2.57957		6.20001	3.08215	-1.51079	1.96719	-0.219586	-1.62512	-4.56014
6.3	3.97649	-0.914429	4.02062	1.319	-3.9556	-2.86956		6.3	3.18559	-0.988956	2.19511	-0.14804	-1.44389	-4.64632
6.40001	5.20305	-1.03008	2.21589	-0.327795	-2.85854	-3.46686		6.40001	3.18255	-0.433198	2.41324	-0.0488029	-1.38766	-4.56149
6.5	6.23883	-1.09363	0.64087	-2.07272	-1.3743	-4.24627		6.5	3.12262	0.0485657	2.5349	-0.0167859	-1.39765	-4.30958
6.60001	6.84403	-1.04147	-0.416479	-3.45005	0.138018	-5.09591		6.60001	3.05129	0.361938	2.47556	-0.116771	-1.40226	-3.93162
6.70001	6.83474	-0.731896	-0.814705	-4.03839	1.28597	-5.90809		6.70001	2.99639	0.449108	2.18284	-0.371483	-1.33929	-3.49495
6.8	6.15354	-0.00389348	-0.568363	-3.68599	1.77944	-6.52467		6.8	2.96269	0.29824	1.66343	-0.765568	-1.17332	-3.07687
6.90001	4.90828	1.17298	0.145766	-2.57273	1.55708	-6.72299		6.90001	2.93619	-0.0577839	0.988931	-1.25686	-0.901603	-2.74658
7	3.34778	2.56932	1.05773	-1.15086	0.786758	-6.29416		7	2.8949	-0.551156	0.273446	-1.78741	-0.552406	-2.55057
7.10001	1.79137	3.75044	1.87338	0.0357276	-0.206766	-5.12498		7.10001	2.81457	-1.09842	-0.364702	-2.29357	-0.178962	-2.50164
7.20001	0.52358	4.23155	2.28176	0.555879	-1.05244	-3.27878		7.20001	2.67041	-1.62175	-0.836411	-2.71426	0.150582	-2.57862
7.3	-0.262821	3.64319	1.992	0.23514	-1.47505	-1.05492		7.3	2.43846	-2.0655	-1.09961	-2.99891	0.367383	-2.73661
7.40001	-0.516156	1.87519	0.849724	-0.817904	-1.36213	1.07098		7.40001	2.10286	-2.40369	-1.16121	-3.11717	0.418107	-2.92184
7.5	-0.337212	-0.84567	-0.994979	-2.29148	-0.786085	2.59014		7.5	1.66467	-2.63985	-1.06707	-3.07289	0.278765	-3.08378
7.60001	0.0881105	-4.0186	-3.06081	-3.80683	0.0570813	3.09633		7.60001	1.15003	-2.80539	-0.886347	-2.91046	-0.038742	-3.18341
7.70001	0.586493	-6.99214	-4.72706	-5.04459	0.928556	2.40652		7.70001	0.612019	-2.9553	-0.692435	-2.70413	-0.487849	-3.20004
7.8	1.05632	-9.14614	-5.49543	-5.81387	1.60485	0.643118		7.8	0.123286	-3.1566	-0.544671	-2.53384	-0.997827	-3.13604
7.90001	1.41118	-10.0978	-5.19984	-6.06321	1.8908	-1.74773		7.90001	-0.240826	-3.46753	-0.479818	-2.45815	-1.49127	-3.01875
8	1.52583	-9.81101	-3.99843	-5.83273	1.64666	-4.17821		8	-0.425197	-3.91466	-0.50989	-2.4955	-1.90351	-2.89806
8.10001	1.25987	-8.57393	-2.25845	-5.1668	0.827079	-6.15269		8.10001	-0.413555	-4.47495	-0.6207	-2.62125	-2.1984	-2.83571
8.20001	0.533689	-6.84288	-0.406445	-4.08319	-0.511996	-7.39516		8.20001	-0.233395	-5.07284	-0.769122	-2.77938	-2.37444	-2.88487
8.3	-0.605257	-5.05623	1.18394	-2.69726	-2.23079	-7.84895		8.3	0.0555669	-5.59747	-0.886475	-2.9046	-2.4617	-3.06758
8.40001	-1.9141	-3.54595	2.25761	-1.27708	-4.11166	-7.60183		8.40001	0.384439	-5.93655	-0.896493	-2.94488	-2.50879	-3.36058
8.5	-2.99263	-2.55244	2.72813	-0.178452	-5.85538	-6.80734		8.5	0.696269	-6.01403	-0.741662	-2.87225	-2.566	-3.69651
8.60001	-3.40018	-2.24905	2.65775	0.322186	-7.11254	-5.63511		8.60001	0.957738	-5.81671	-0.405196	-2.68358	-2.66968	-3.98244
8.70001	-2.84213	-2.71659	2.16023	0.13595	-7.60177	-4.30008		8.70001	1.15769	-5.39764	0.0792655	-2.39588	-2.8323	-4.12996
8.8	-1.34293	-3.85075	1.36215	-0.599321	-7.21489	-3.07331		8.8	1.30232	-4.85555	0.636598	-2.03756	-3.03832	-4.08326
8.90001	0.721491	-5.29334	0.397984	-1.58186	-6.06558	-2.21887		8.90001	1.41027	-4.30393	1.17172	-1.64017	-3.24949	-3.83073
9	2.79991	-6.52102	-0.53117	-2.4531	-4.46775	-1.89055		9	1.50931	-3.84248	1.59848	-1.24073	-3.41623	-3.39995
9.10001	4.39619	-7.04348	-1.14528	-2.94665	-2.84553	-2.03511		9.10001	1.63467	-3.53892	1.86329	-0.888292	-3.48633	-2.8454
9.20001	5.25362	-6.60997	-1.16529	-2.97612	-1.58658	-2.39095		9.20001	1.82689	-3.42066	1.95723	-0.640834	-3.40988	-2.23546
9.3	5.38921	-5.3358	-0.428672	-2.57216	-0.915471	-2.61444		9.3	2.12348	-3.4734	1.91368	-0.55012	-3.14394	-1.64002
9.40001	5.03148	-3.63765	0.992858	-1.83713	-0.834032	-2.45425		9.40001	2.54299	-3.6458	1.79251	-0.640896	-2.66288	-1.11837
9.5	4.45542	-2.02198	2.74041	-0.923017	-1.15967	-1.86468		9.5	3.06608	-3.86028	1.65846	-0.897639	-1.97369	-0.713424
9.60001	3.86991	-0.882213	4.27482	0.0281717	-1.6115	-0.953803		9.60001	3.63107	-4.02838	1.56665	-1.26377	-1.12572	-0.446359
9.70001	3.36105	-0.433575	5.09872	0.922996	-1.94331	0.114766		9.70001	4.15059	-4.06866	1.55744	-1.65793	-0.206314	-0.308486
9.8	2.94348	-0.729273	4.99632	1.62354	-2.00742	1.1706		9.8	4.54428	-3.92453	1.65613	-2.00009	0.679945	-0.254603
9.90001	2.66493	-1.68237	4.09539	1.90833	-1.7037	2.03205		9.90001	4.769	-3.58107	1.87137	-2.23439	1.44266	-0.207651
10	2.66239	-3.04581	2.78092	1.50953	-0.931128	2.52009		10	4.82942	-3.07252	2.18946	-2.34029	2.03389	-0.0801394
10.1	3.12803	-4.4425	1.51725	0.265066	0.409228	2.52068		10.1	4.76877	-2.47496	2.56957	-2.33226	2.45767	0.193765
10.2	4.13892	-5.4832	0.668307	-1.72164	2.32269	2.06065		10.2	4.65005	-1.8837	2.94705	-2.25198	2.75835	0.631948
10.3	5.49238	-5.89532	0.378805	-4.04246	4.60367	1.249		10.3	4.53658	-1.38272	3.24824	-2.15339	2.99532	1.19826
10.4	6.76273	-5.57414	0.599575	-6.08822	6.81368	0.240023		10.4	4.47776	-1.02076	3.4168	-2.08356	3.21814	1.81812
10.5	7.48883	-4.53551	1.2056	-7.30007	8.41506	-0.72946		10.5	4.50044	-0.803957	3.43872	-2.0711	3.45087	2.40343
10.6	7.41423	-2.84314	2.0756	-7.39869	9.00084	-1.30287		10.6	4.61154	-0.700664	3.35063	-2.12489	3.69082	2.87824
10.7	6.62012	-0.682208	3.12802	-6.43614	8.49834	-1.09237		10.7	4.80683	-0.653871	3.22381	-2.23555	3.9166	3.19828
10.8	5.42345	1.6018	4.26222	-4.74694	7.20537	0.132589		10.8	5.07623	-0.598612	3.13464	-2.37489	4.09669	3.36275
10.9	4.22248	3.54861	5.29656	-2.83963	5.61779	2.26542		10.9	5.40208	-0.480042	3.13688	-2.49222	4.19629	3.4134
11	3.37094	4.71559	5.98848	-1.2074	4.19606	4.83467		11	5.75381	-0.267123	3.2472	-2.51958	4.18067	3.41935
11.1	3.10248	4.87893	6.11302	-0.161035	3.1944	7.1731		11.1	6.08694	0.0424453	3.44819	-2.38948	4.01952	3.45074
11.2	3.45562	4.13139	5.606	0.264139	2.62835	8.67282		11.2	6.35156	0.428332	3.70366	-2.05973	3.69626	3.55782
11.3	4.25548	2.80346	4.64748	0.239894	2.34481	8.99654		11.3	6.50576	0.859054	3.97372	-1.53714	3.2196	3.7628
11.4	5.2497	1.32242	3.60116	0.00868468	2.13593	8.18655		11.4	6.53173	1.29838	4.22202	-0.88492	2.63043	4.05951
11.5	6.26346	0.0661985	2.84042	-0.257803	1.83087	6.61119		11.5	6.44526	1.70308	4.4185	-0.206036	1.99734	4.41489
11.6	7.24471	-0.742963	2.57955	-0.460482	1.35784	4.82804		11.6	6.29045	2.02292	4.53806	0.387905	1.39995	4.77169
11.7	8.20185	-1.03012	2.81895	-0.484992	0.761942	3.38121		11.7	6.12415	2.20649	4.56361	0.809227	0.904681	5.05626
11.8	9.10739	-0.822871	3.39272	-0.200111	0.143837	2.6219		11.8	5.99458	2.21548	4.49527	1.01756	0.54635	5.19363
11.9	9.80209	-0.220539	4.08505	0.490053	-0.41695	2.59417		11.9	5.92456	2.04166	4.35764	1.02546	0.324267	5.12673
12	9.99094	0.664751	4.72183	1.56331	-0.891751	3.06943		12	5.90416	1.71668	4.19973	0.884721	0.212808	4.83384
12.1	9.3841	1.74813	5.19054	2.79575	-1.28951	3.7246		12.1	5.89738	1.30807	4.08251	0.660445	0.178256	4.34047
12.2	7.93045	2.93295	5.42683	3.78776	-1.60083	4.31463		12.2	5.86007	0.903987	4.05902	0.41057	0.192102	3.71752
12.3	5.94408	4.03689	5.4157	4.14234	-1.76172	4.73863		12.3	5.75524	0.587996	4.15814	0.176181	0.236591	3.06291
12.4	3.98837	4.75502	5.1606	3.66085	-1.65727	4.97319		12.4	5.55831	0.415488	4.37836	-0.0172856	0.303931	2.47013
12.5	2.59644	4.72248	4.6965	2.41555	-1.21423	4.97026		12.5	5.25543	0.397586	4.69131	-0.157602	0.390672	1.99693
12.6	2.01978	3.70143	4.13479	0.702005	-0.473841	4.60072		12.6	4.84217	0.498581	5.04949	-0.247217	0.491153	1.65044
12.7	2.18055	1.76066	3.64876	-1.07308	0.420655	3.69747		12.7	4.3246	0.650226	5.39811	-0.304887	0.595381	1.3942
12.8	2.75576	-0.645688	3.42856	-2.5536	1.2996	2.19403		12.8	3.72694	0.778585	5.68811	-0.364676	0.69253	1.17251
12.9	3.34037	-2.81504	3.61319	-3.54856	2.04096	0.285391		12.9	3.09992	0.828356	5.88534	-0.469995	0.777645	0.935561
13	3.62124	-4.06593	4.24818	-4.00798	2.5802	-1.59361		13	2.51785	0.773808	5.97585	-0.660201	0.856736	0.65145
13.1	3.46747	-4.04943	5.2862	-3.97593	2.89224	-2.94172		13.1	2.05973	0.61763	5.96812	-0.952177	0.946465	0.307045
13.2	2.91569	-2.86643	6.5842	-3.54674	2.97565	-3.46612		13.2	1.78212	0.385815	5.88888	-1.32966	1.06534	-0.0977313
13.3	2.09577	-1.0473	7.89964	-2.84586	2.83244	-3.21635		13.3	1.69698	0.12633	5.7758	-1.74771	1.21975	-0.555802
13.4	1.17632	0.686804	8.9081	-2.00844	2.47011	-2.5091		13.4	1.76678	-0.0905072	5.66799	-2.14863	1.39669	-1.05171
13.5	0.308851	1.75508	9.31924	-1.1805	1.91571	-1.73421		13.5	1.91986	-0.180613	5.59445	-2.48179	1.56576	-1.55249
13.6	-0.358135	1.96157	9.01496	-0.526362	1.23459	-1.17464		13.6	2.07544	-0.0658175	5.56749	-2.7188	1.68637	-1.99896
13.7	-0.668545	1.51087	8.0748	-0.227111	0.555199	-0.958634		13.7	2.17011	0.297684	5.58135	-2.85707	1.71862	-2.31058
13.8	-0.51107	0.820804	6.72915	-0.437749	0.0550504	-1.1053		13.8	2.17637	0.895654	5.61665	-2.91427	1.63574	-2.4102
13.9	0.142543	0.277943	5.29541	-1.17584	-0.075431	-1.54025		13.9	2.10365	1.64998	5.64535	-2.92133	1.43408	-2.25631
14	1.22465	0.0960325	4.06872	-2.27485	0.259075	-2.14257		14	1.98607	2.43884	5.63218	-2.91479	1.13832	-1.867
14.1	2.54102	0.343772	3.23816	-3.44595	0.967726	-2.81401		14.1	1.8674	3.13322	5.53659	-2.92973	0.796976	-1.317
14.2	3.78296	1.03625	2.86373	-4.40009	1.79388	-3.46025		14.2	1.78843	3.6373	5.31871	-2.99257	0.469922	-0.710318
14.3	4.62223	2.16962	2.88471	-4.96179	2.40034	-3.91249		14.3	1.7787	3.91476	4.95498	-3.11658	0.214289	-0.145275
14.4	4.82531	3.71219	3.19039	-5.10219	2.47092	-3.89255		14.4	1.85113	3.99046	4.45425	-3.29923	0.073852	0.31205
14.5	4.36518	5.53383	3.6642	-4.90431	1.84791	-3.10349		14.5	1.99829	3.93079	3.86347	-3.52066	0.0726399	0.637329
14.6	3.44675	7.35045	4.21336	-4.52091	0.631955	-1.40808		14.6	2.19463	3.81393	3.25907	-3.74093	0.210816	0.840685
14.7	2.38507	8.75756	4.73603	-4.12798	-0.848088	1.02257		14.7	2.40105	3.70424	2.7246	-3.89997	0.461428	0.955841
14.8	1.46864	9.36128	5.0623	-3.86476	-2.1356	3.67655		14.8	2.56985	3.64066	2.32251	-3.92933	0.769514	1.02897
14.9	0.898231	8.93804	4.95921	-3.8007	-2.82719	5.88388		14.9	2.65008	3.63787	2.07714	-3.77152	1.06103	1.10776
15	0.753268	7.52197	4.19567	-3.91418	-2.72749	7.09716		15	2.59937	3.69189	1.97256	-3.40132	1.25981	1.23398
15.1	1.011	5.40369	2.72472	-4.11663	-1.87564	7.09664		15.1	2.40083	3.78389	1.96093	-2.83719	1.30785	1.43685
15.2	1.54019	3.04202	0.806688	-4.28546	-0.471722	6.0403		15.2	2.07639	3.88149	1.97737	-2.13887	1.18563	1.72279
15.3	2.1435	0.947123	-1.02819	-4.2908	1.21398	4.35511		15.3	1.68966	3.93797	1.95598	-1.39284	0.926187	2.06353
15.4	2.66931	-0.475759	-2.2	-3.97166	2.90418	2.49842		15.4	1.33083	3.89768	1.84434	-0.689755	0.609018	2.39395
15.5	2.99803	-1.04391	-2.35688	-3.1414	4.31546	0.852346		15.5	1.08664	3.71179	1.6123	-0.101119	0.330782	2.62611
15.6	3.01206	-0.802992	-1.54009	-1.67489	5.16203	-0.29707		15.6	1.01281	3.36326	1.25579	0.335472	0.168636	2.67488
15.7	2.58863	0.0486321	-0.102656	0.407905	5.21484	-0.80311		15.7	1.11851	2.88503	0.798824	0.621114	0.152827	2.48909
15.8	1.67895	1.26217	1.46026	2.84731	4.34701	-0.668302		15.8	1.3657	2.35777	0.294646	0.79053	0.26187	2.0723
15.9	0.407802	2.60013	2.66608	5.19013	2.61054	-0.0114512		15.9	1.68384	1.88549	-0.175698	0.897213	0.437848	1.4841
16	-0.893225	3.82893	3.16419	6.90969	0.322609	0.948501		16	1.99221	1.55966	-0.519451	0.993111	0.609865	0.820548
16.1	-1.74919	4.67242	2.82687	7.58043	-1.9396	1.89999		16.1	2.222	1.42944	-0.66181	1.11137	0.71347	0.183792
16.2	-1.73486	4.84879	1.76621	7.04808	-3.54396	2.51377		16.2	2.33082	1.4916	-0.578349	1.26185	0.703723	-0.347097
16.3	-0.704522	4.19026	0.268796	5.4859	-4.09807	2.53854		16.3	2.30263	1.70109	-0.310298	1.43456	0.563105	-0.730473
16.4	1.13003	2.83259	-1.32465	3.29406	-3.60455	1.85171		16.4	2.1434	1.99088	0.0479815	1.60478	0.305326	-0.966682
16.5	3.2654	1.23149	-2.70621	0.991148	-2.40437	0.518009		16.5	1.87779	2.29018	0.383609	1.73895	-0.027886	-1.09515
16.6	5.10053	-0.0255352	-3.61182	-0.920625	-0.973452	-1.20147		16.6	1.54879	2.53849	0.600556	1.80032	-0.37627	-1.17965
16.7	6.16165	-0.506762	-3.80018	-2.10056	0.264128	-2.90229		16.7	1.21715	2.69122	0.643927	1.75628	-0.671479	-1.28672
16.8	6.25332	-0.135314	-3.11908	-2.48637	1.04865	-4.1837		16.8	0.95243	2.72178	0.509814	1.58535	-0.847852	-1.4686
16.9	5.44663	0.828207	-1.61342	-2.27504	1.28957	-4.78456		16.9	0.814213	2.62476	0.241853	1.28716	-0.857957	-1.75381
17	3.9934	2.00381	0.390651	-1.7326	1.04829	-4.67		17	0.827847	2.42146	-0.0859405	0.891754	-0.69157	-2.14181
17.1	2.1901	3.08557	2.35687	-1.03566	0.513687	-4.01897		17.1	0.969178	2.16182	-0.392119	0.457377	-0.38461	-2.60369
17.2	0.291182	3.88256	3.73387	-0.247593	-0.0668032	-3.16321		17.2	1.16909	1.91832	-0.606096	0.0561346	-0.00822514	-3.08931
17.3	-1.5033	4.28507	4.16559	0.605998	-0.502565	-2.4811		17.3	1.33764	1.7676	-0.678878	-0.244825	0.355109	-3.53632
17.4	-3.00445	4.27002	3.58544	1.4512	-0.707697	-2.23947		17.4	1.39765	1.7618	-0.58889	-0.404223	0.637365	-3.88213
17.5	-3.95895	3.85853	2.19756	2.0986	-0.671523	-2.4886		17.5	1.30902	1.90708	-0.347161	-0.419083	0.802275	-4.07962
17.6	-4.09241	3.11971	0.386164	2.28424	-0.387811	-3.10334		17.6	1.07583	2.16242	-0.00398408	-0.321813	0.848844	-4.11356
17.7	-3.2429	2.17953	-1.39115	1.84048	0.15083	-3.90011		17.7	0.736952	2.4575	0.35308	-0.164449	0.802336	-4.01001
17.8	-1.51743	1.21635	-2.74563	0.858539	0.888976	-4.69603		17.8	0.349363	2.71869	0.616933	-0.00094424	0.702724	-3.83061
17.9	0.667765	0.434869	-3.43882	-0.336336	1.67435	-5.33815		17.9	-0.0293911	2.88836	0.69458	0.120921	0.594327	-3.65168
18	2.69404	0.0506891	-3.36881	-1.33522	2.30048	-5.71703		18	-0.35263	2.93292	0.540709	0.161046	0.516773	-3.53973
18.1	3.99525	0.270342	-2.56194	-1.82225	2.57213	-5.74744		18.1	-0.589799	2.84538	0.174394	0.0900538	0.496981	-3.53234
18.2	4.28555	1.13302	-1.17641	-1.71862	2.39398	-5.36078		18.2	-0.728404	2.64372	-0.327572	-0.105074	0.546437	-3.63097
18.3	3.59384	2.44411	0.497582	-1.17324	1.83002	-4.55869		18.3	-0.775692	2.36563	-0.85417	-0.414481	0.662774	-3.80784
18.4	2.19751	3.83409	2.03382	-0.446972	1.05579	-3.47939		18.4	-0.763122	2.05906	-1.29208	-0.799366	0.833546	-4.01847
18.5	0.492362	4.88101	2.95101	0.188825	0.258024	-2.42332		18.5	-0.746089	1.77094	-1.55661	-1.19195	1.03734	-4.21299
18.6	-1.14239	5.26853	2.87207	0.504547	-0.403835	-1.73472		18.6	-0.79503	1.53685	-1.61379	-1.50907	1.2408	-4.34524
18.7	-2.44542	4.88812	1.71065	0.339115	-0.794471	-1.62826		18.7	-0.976616	1.37502	-1.48456	-1.67599	1.39926	-4.3813
18.8	-3.30496	3.84302	-0.258935	-0.353528	-0.804734	-2.11575		18.8	-1.33013	1.28446	-1.2316	-1.65165	1.46527	-4.3062
18.9	-3.74069	2.39448	-2.49349	-1.45447	-0.403262	-3.03759		18.9	-1.84693	1.24316	-0.939105	-1.44633	1.40295	-4.12638
19	-3.85958	0.856848	-4.36784	-2.71117	0.33818	-4.15775		19	-2.4658	1.20541	-0.692511	-1.12166	1.203	-3.86583
19.1	-3.80834	-0.457506	-5.36672	-3.80871	1.27003	-5.24639		19.1	-3.09199	1.11156	-0.561064	-0.767339	0.890245	-3.56172
19.2	-3.74527	-1.35312	-5.24694	-4.44445	2.2316	-6.06927		19.2	-3.62777	0.906423	-0.585336	-0.466443	0.518078	-3.2612
19.3	-3.80285	-1.77836	-4.11081	-4.38975	3.07676	-6.41023		19.3	-4.00305	0.559095	-0.76825	-0.26893	0.153336	-3.01737
19.4	-4.0749	-1.79998	-2.36328	-3.55046	3.60964	-6.14834		19.4	-4.19243	0.0770242	-1.07327	-0.181408	-0.142644	-2.87903
19.5	-4.6044	-1.53486	-0.548645	-1.97915	3.5827	-5.30905		19.5	-4.216	-0.491944	-1.43309	-0.17041	-0.331946	-2.87886
19.6	-5.34202	-1.10463	0.861532	0.0775057	2.79651	-4.06132		19.6	-4.12748	-1.07315	-1.76616	-0.175745	-0.409223	-3.02412
19.7	-6.09149	-0.651338	1.60355	2.15516	1.24104	-2.66013		19.7	-3.99685	-1.58758	-1.99656	-0.131374	-0.399575	-3.29316
19.8	-6.52563	-0.37142	1.63015	3.69716	-0.827042	-1.31821		19.8	-3.893	-1.97462	-2.07345	0.0127939	-0.347349	-3.63749
19.9	-6.35963	-0.462479	1.05819	4.30484	-2.92278	-0.19082		19.9	-3.86773	-2.20761	-1.98515	0.277444	-0.300724	-3.99047
20	-5.51446	-1.04322	0.0849622	3.942	-4.49681	0.55008		20	-3.94506	-2.29729	-1.76294	0.650518	-0.301285	-4.28118
20.1	-4.18221	-2.07048	-1.07573	2.91074	-5.14483	0.66583		20.1	-4.11866	-2.28164	-1.47288	1.09161	-0.380194	-4.45537
20.2	-2.72702	-3.3142	-2.23437	1.67671	-4.77363	-0.0716175		20.2	-4.35817	-2.21227	-1.19816	1.54164	-0.555453	-4.49255
20.3	-1.54307	-4.40392	-3.24484	0.691517	-3.62197	-1.73173		20.3	-4.61925	-2.14425	-1.01688	1.93169	-0.824692	-4.41033
20.4	-0.940555	-4.99237	-3.95153	0.248411	-2.10818	-4.0977		20.4	-4.84993	-2.1314	-0.981693	2.18969	-1.15736	-4.25599
20.5	-1.08438	-4.90224	-4.17568	0.400779	-0.640724	-6.68945		20.5	-4.99588	-2.22268	-1.10855	2.25198	-1.49321	-4.08894
20.6	-1.97515	-4.1853	-3.80063	0.996393	0.484585	-8.89127		20.6	-5.01369	-2.45751	-1.37494	2.08152	-1.75233	-3.96316
20.7	-3.42998	-3.10402	-2.86672	1.78788	1.1308	-10.1584		20.7	-4.88762	-2.85706	-1.72388	1.68793	-1.85713	-3.9186
20.8	-5.12296	-1.98202	-1.58913	2.53354	1.2605	-10.1885		20.8	-4.63687	-3.4169	-2.07866	1.1322	-1.75875	-3.97563
20.9	-6.69642	-1.0871	-0.315927	3.05416	0.890145	-9.03053		20.9	-4.30829	-4.10671	-2.3676	0.508637	-1.4564	-4.12824
21	-7.87455	-0.598994	0.559371	3.26075	0.0973455	-7.04224		21	-3.95932	-4.87943	-2.54757	-0.084109	-1.00113	-4.33894
21.1	-8.51336	-0.643721	0.718539	3.08029	-0.967413	-4.75056		21.1	-3.64096	-5.68768	-2.61184	-0.570431	-0.479986	-4.54197
21.2	-8.52594	-1.31631	0.0494796	2.40697	-2.07267	-2.6853		21.2	-3.38487	-6.50518	-2.58165	-0.916283	0.0131766	-4.65487
21.3	-7.82308	-2.65648	-1.29506	1.13631	-2.91295	-1.22144		21.3	-3.1967	-7.34285	-2.4959	-1.13301	0.405813	-4.59754
21.4	-6.39436	-4.64343	-2.92511	-0.742638	-3.16396	-0.521873		21.4	-3.05404	-8.25034	-2.40405	-1.26727	0.66346	-4.31558
21.5	-4.38239	-7.16379	-4.30175	-2.99386	-2.60867	-0.560744		21.5	-2.91155	-9.30259	-2.35733	-1.3814	0.792837	-3.8034
21.6	-2.09695	-9.97974	-4.9731	-5.14262	-1.25026	-1.16035		21.6	-2.71498	-10.5766	-2.39905	-1.53312	0.834185	-3.11404
21.7	0.0715433	-12.7699	-4.82707	-6.65851	0.64312	-2.04438		21.7	-2.41855	-12.1305	-2.55644	-1.7606	0.849719	-2.35102
21.8	1.75023	-15.2067	-4.13522	-7.16595	2.59477	-2.91601		21.8	-1.998	-13.9888	-2.83345	-2.07514	0.908261	-1.64118
21.9	2.68501	-17.0545	-3.32691	-6.59076	4.08578	-3.52306		21.9	-1.45635	-16.1381	-3.20391	-2.46209	1.06664	-1.09863
22	2.81052	-18.3015	-2.73156	-5.18797	4.76179	-3.65112		22	-0.821463	-18.5317	-3.61163	-2.88383	1.35423	-0.793306
22.1	2.25837	-19.2327	-2.49386	-3.43599	4.56664	-3.12311		22.1	-0.139085	-21.099	-3.98374	-3.284	1.7649	-0.735379
22.2	1.34072	-20.3295	-2.61411	-1.88156	3.73929	-1.89609		22.2	0.534063	-23.7567	-4.25372	-3.59476	2.25656	-0.881485
22.3	0.44721	-22.0737	-3.00641	-0.943882	2.68398	-0.184156		22.3	1.1388	-26.4182	-4.38339	-3.74551	2.75519	-1.15528
22.4	-0.0881866	-24.7624	-3.57603	-0.791282	1.83372	1.56077		22.4	1.62002	-29.0068	-4.37822	-3.68119	3.16709	-1.47139
22.5	-0.0837437	-28.3978	-4.26484	-1.3337	1.52458	2.78278		22.5	1.93353	-31.4711	-4.2852	-3.38646	3.39995	-1.75755
22.6	0.452967	-32.6782	-5.02494	-2.29306	1.88536	3.03687		22.6	2.05472	-33.7958	-4.17011	-2.89914	3.38647	-1.96953
22.7	1.33352	-37.1376	-5.73845	-3.31738	2.78985	2.18101		22.7	1.98758	-36.0012	-4.09034	-2.30381	3.1037	-2.09585
22.8	2.27968	-41.3349	-6.21274	-4.08922	3.92156	0.439984		22.8	1.76738	-38.1323	-4.07926	-1.70739	2.57969	-2.15369
22.9	3.0745	-44.9608	-6.2764	-4.39586	4.90874	-1.70054		22.9	1.45274	-40.2395	-4.14619	-1.20604	1.88459	-2.18446
23	3.62043	-47.8368	-5.88474	-4.14671	5.4452	-3.70524		23	1.11222	-42.357	-4.28749	-0.857339	1.10944	-2.24802
23.1	3.88613	-49.8889	-5.12956	-3.30534	5.31275	-5.17641		23.1	0.804849	-44.4874	-4.49861	-0.668235	0.340028	-2.40889
23.2	3.79846	-51.1698	-4.21373	-1.90036	4.39374	-5.93451		23.2	0.561649	-46.597	-4.78078	-0.602913	-0.365049	-2.71686
23.3	3.23273	-51.8734	-3.3918	-0.132327	2.70832	-6.0251		23.3	0.377225	-48.6215	-5.13487	-0.604009	-0.988061	-3.18961
23.4	2.13172	-52.2887	-2.87059	1.62602	0.413972	-5.64814		23.4	0.213495	-50.4819	-5.55027	-0.61372	-1.5526	-3.80266
23.5	0.608875	-52.7	-2.7791	2.95454	-2.21229	-5.0634		23.5	0.0135173	-52.1088	-5.99852	-0.58889	-2.1089	-4.49412
23.6	-1.05842	-53.2832	-3.13851	3.54839	-4.82242	-4.50639		23.6	-0.277311	-53.462	-6.43781	-0.507381	-2.71064	-5.18178
23.7	-2.53837	-54.1229	-3.86938	3.335	-7.05503	-4.17424		23.7	-0.691679	-54.5386	-6.8292	-0.368023	-3.39228	-5.78652
23.8	-3.53056	-55.2303	-4.89598	2.49196	-8.61082	-4.20361		23.8	-1.23366	-55.371	-7.15426	-0.18831	-4.15545	-6.2507
23.9	-3.88451	-56.5461	-6.20321	1.33322	-9.34073	-4.63077		23.9	-1.88499	-56.0161	-7.4224	0.000517857	-4.96908	-6.54733
24	-3.68719	-57.9377	-7.80328	0.166591	-9.30232	-5.41974		24	-2.61524	-56.544	-7.66783	0.153951	-5.77795	-6.68165
24.1	-3.22339	-59.1785	-9.59559	-0.809917	-8.75749	-6.47595		24.1	-3.38562	-57.0254	-7.9395	0.217255	-6.51737	-6.68501
24.2	-2.86715	-60.0237	-11.3265	-1.49879	-8.07251	-7.63908		24.2	-4.14578	-57.5152	-8.28447	0.137905	-7.12802	-6.60368
24.3	-2.94666	-60.3355	-12.6453	-1.87095	-7.57175	-8.71797		24.3	-4.83547	-58.0412	-8.73218	-0.118173	-7.56386	-6.48695
24.4	-3.61056	-60.1424	-13.2064	-1.93173	-7.43985	-9.50921		24.4	-5.39558	-58.6028	-9.28307	-0.551888	-7.79703	-6.37795
24.5	-4.76457	-59.6381	-12.8664	-1.72014	-7.6662	-9.84054		24.5	-5.78528	-59.1782	-9.90817	-1.12544	-7.82202	-6.3077
24.6	-6.13912	-59.1118	-11.8025	-1.34074	-8.06524	-9.59168		24.6	-5.99696	-59.7319	-10.5634	-1.77025	-7.65829	-6.29184
24.7	-7.45225	-58.8022	-10.4431	-0.936637	-8.38655	-8.74796		24.7	-6.0631	-60.2202	-11.2039	-2.40639	-7.35057	-6.32913
24.8	-8.52812	-58.864	-9.30185	-0.696973	-8.43792	-7.45982		24.8	-6.0481	-60.5965	-11.7939	-2.96368	-6.96368	-6.40106
24.9	-9.29799	-59.3532	-8.83215	-0.824189	-8.17651	-5.99158		24.9	-6.02663	-60.8181	-12.3089	-3.39657	-6.56849	-6.47041
25	-9.68999	-60.1992	-9.2562	-1.48127	-7.67266	-4.64246		25	-6.05942	-60.8593	-12.7393	-3.68961	-6.22183	-6.487
25.1	-9.59302	-61.2316	-10.4817	-2.72731	-6.99534	-3.66376		25.1	-6.17582	-60.7214	-13.0928	-3.85465	-5.94947	-6.40286
25.2	-8.91299	-62.2476	-12.1442	-4.41861	-6.17615	-3.21046		25.2	-6.36788	-60.4347	-13.3974	-3.9218	-5.74147	-6.19144
25.3	-7.68328	-63.0651	-13.7653	-6.20204	-5.2472	-3.31203		25.3	-6.59895	-60.0515	-13.7031	-3.92769	-5.56046	-5.86155
25.4	-6.13706	-63.5356	-15.0077	-7.62669	-4.27174	-3.90472		25.4	-6.82183	-59.6307	-14.0739	-3.90522	-5.35938	-5.45767
25.5	-4.65493	-63.5314	-15.7855	-8.32249	-3.37953	-4.83746		25.5	-6.99406	-59.221	-14.5688	-3.87868	-5.10268	-5.04906
25.6	-3.62943	-62.9422	-16.2334	-8.14066	-2.76354	-5.85357		25.6	-7.08494	-58.85	-15.2215	-3.86325	-4.77874	-4.71247
25.7	-3.32215	-61.7057	-16.558	-7.19249	-2.58409	-6.5988		25.7	-7.07674	-58.5167	-16.0239	-3.86279	-4.39943	-4.51002
25.8	-3.78083	-59.8795	-16.9114	-5.79173	-2.86428	-6.75782		25.8	-6.96582	-58.1907	-16.922	-3.86597	-3.99025	-4.4719
25.9	-4.84596	-57.6794	-17.3358	-4.30432	-3.44248	-6.20884		25.9	-6.76683	-57.8263	-17.828	-3.84116	-3.58094	-4.58964
26	-6.21172	-55.4616	-17.8239	-3.01259	-4.03571	-5.12371		26	-6.51575	-57.3804	-18.6453	-3.7375	-3.20075	-4.81921
26.1	-7.53883	-53.627	-18.4044	-2.03183	-4.3626	-3.90116		26.1	-6.26964	-56.8263	-19.2988	-3.49737	-2.87802	-5.09162
26.2	-8.55346	-52.485	-19.1697	-1.33822	-4.24789	-2.9746		26.2	-6.09696	-56.1572	-19.7557	-3.07551	-2.64037	-5.32972
26.3	-9.06707	-52.147	-20.2156	-0.889447	-3.70133	-2.64529		26.3	-6.05827	-55.382	-20.0269	-2.46025	-2.51173	-5.46474
26.4	-8.99714	-52.4948	-21.5382	-0.674365	-2.87955	-3.0259		26.4	-6.18322	-54.5195	-20.1517	-1.68632	-2.506	-5.4526
26.5	-8.3888	-53.1975	-22.9434	-0.689185	-1.9897	-4.01824		26.5	-6.45483	-53.5983	-20.1797	-0.829633	-2.61923	-5.28815
26.6	-7.4123	-53.8121	-24.0998	-0.878322	-1.22051	-5.34349		26.6	-6.81052	-52.6591	-20.1573	0.0144794	-2.8242	-5.01286
26.7	-6.30707	-54.0036	-24.6574	-1.05943	-0.714414	-6.64397		26.7	-7.16251	-51.7529	-20.1232	0.761023	-3.07242	-4.7079
26.8	-5.3248	-53.6524	-24.3761	-0.965068	-0.531989	-7.56653		26.8	-7.42739	-50.9318	-20.1066	1.35838	-3.30475	-4.47133
26.9	-4.72907	-52.8273	-23.2533	-0.336482	-0.689816	-7.84139		26.9	-7.54894	-50.2288	-20.1223	1.7971	-3.46862	-4.38554
27	-4.74775	-51.6907	-21.5335	0.969687	-1.2072	-7.35981		27	-7.50597	-49.6393	-20.1623	2.10287	-3.53458	-4.49051
27.1	-5.47921	-50.3562	-19.6179	2.83265	-2.08478	-6.19996		27.1	-7.3099	-49.1151	-20.1906	2.31995	-3.50443	-4.77461
27.2	-6.77916	-48.8689	-17.9078	4.83431	-3.28215	-4.6312		27.2	-6.99772	-48.5795	-20.1459	2.49798	-3.40514	-5.18358
27.3	-8.24681	-47.2827	-16.709	6.42308	-4.68845	-3.05789		27.3	-6.6213	-47.9558	-19.9547	2.682	-3.27514	-5.63966
27.4	-9.36891	-45.7385	-16.1772	7.15741	-6.06861	-1.91883		27.4	-6.23601	-47.1969	-19.5558	2.90514	-3.1508	-6.0666
27.5	-9.76467	-44.4751	-16.3309	6.89952	-7.08402	-1.57345		27.5	-5.89133	-46.3021	-18.9266	3.18333	-3.05766	-6.40973
27.6	-9.34884	-43.7209	-17.0541	5.85074	-7.39196	-2.18719		27.6	-5.62501	-45.3114	-18.1002	3.50906	-3.00581	-6.64379
27.7	-8.27808	-43.51	-18.0904	4.44571	-6.82163	-3.66529		27.7	-5.46089	-44.2862	-17.166	3.85113	-2.99203	-6.77423
27.8	-6.8084	-43.6055	-19.0847	3.16625	-5.48383	-5.68557		27.8	-5.40137	-43.2862	-16.2448	4.15981	-3.00372	-6.83497
27.9	-5.22024	-43.5736	-19.6513	2.35207	-3.73537	-7.8043		27.9	-5.41909	-42.3538	-15.4522	4.37489	-3.0218	-6.8806
28	-3.75998	-43.042	-19.455	2.13703	-2.01331	-9.59779		28	-5.45533	-41.5094	-14.8645	4.44112	-3.02113	-6.97284
28.1	-2.59798	-41.8917	-18.2877	2.45405	-0.669641	-10.7793		28.1	-5.43507	-40.7565	-14.5006	4.32796	-2.96851	-7.16305
28.2	-1.83892	-40.2959	-16.1632	3.10417	0.124147	-11.2762		28.2	-5.29536	-40.0854	-14.3229	4.04121	-2.82394	-7.47612
28.3	-1.55266	-38.6002	-13.4019	3.85092	0.362756	-11.1768		28.3	-5.01242	-39.4755	-14.2573	3.62042	-2.55493	-7.90148
28.4	-1.77963	-37.1627	-10.6088	4.47792	0.167082	-10.6231		28.4	-4.61285	-38.8925	-14.2176	3.1254	-2.15748	-8.39552
28.5	-2.53476	-36.2227	-8.49562	4.85014	-0.297643	-9.78392		28.5	-4.16477	-38.2878	-14.1299	2.61569	-1.67015	-8.89301
28.6	-3.71737	-35.8284	-7.59313	4.91105	-0.888672	-8.87406		28.6	-3.7581	-37.6077	-13.9513	2.13339	-1.16955	-9.32036
28.7	-5.04896	-35.8389	-8.05847	4.6262	-1.51443	-8.13543		28.7	-3.482	-36.8124	-13.6796	1.69525	-0.746399	-9.6096
28.8	-6.09526	-36.0028	-9.62798	3.95848	-2.07342	-7.76801		28.8	-3.40037	-35.8963	-13.3516	1.29682	-0.474018	-9.71298
28.9	-6.43473	-36.0694	-11.72	2.91057	-2.38771	-7.86479		28.9	-3.53499	-34.8921	-13.0344	0.922462	-0.384028	-9.61549
29	-5.87175	-35.8737	-13.6895	1.54834	-2.23064	-8.38011		29	-3.86012	-33.8568	-12.8085	0.554453	-0.459608	-9.34212
29.1	-4.55884	-35.3697	-15.0618	0.00402836	-1.49543	-9.14996		29.1	-4.30917	-32.8498	-12.7499	0.177573	-0.647494	-8.95626
29.2	-2.97201	-34.5653	-15.655	-1.51593	-0.327388	-9.97216		29.2	-4.79288	-31.9154	-12.9116	-0.220778	-0.876701	-8.54754
29.3	-1.73159	-33.4408	-15.5635	-2.81428	0.892506	-10.6445		29.3	-5.22173	-31.0752	-13.3073	-0.649393	-1.07764	-8.21178
29.4	-1.36469	-31.9485	-15.0553	-3.75343	1.68863	-10.9301		29.4	-5.52411	-30.3279	-13.9003	-1.11343	-1.19403	-8.02631
29.5	-2.11466	-30.0854	-14.4649	-4.28202	1.70975	-10.6027		29.5	-5.66061	-29.6553	-14.6065	-1.61467	-1.18802	-8.02711
29.6	-3.83247	-27.9985	-14.0757	-4.42127	0.895097	-9.56182		29.6	-5.63262	-29.0313	-15.3133	-2.1476	-1.04036	-8.20013
29.7	-6.04855	-25.971	-14.0621	-4.22707	-0.483474	-7.94053		29.7	-5.48637	-28.4328	-15.9079	-2.69218	-0.752919	-8.48843
29.8	-8.12527	-24.2916	-14.4473	-3.80211	-1.95451	-6.13181		29.8	-5.30869	-27.8447	-16.3089	-3.21054	-0.351701	-8.81194
29.9	-9.47268	-23.177	-15.1674	-3.30279	-3.06991	-4.71671		29.9	-5.21089	-27.2588	-16.4859	-3.65182	0.111427	-9.09256
30	-9.77579	-22.7161	-16.1511	-2.92105	-3.53376	-4.22846		30	-5.2984	-26.6722	-16.4632	-3.96337	0.564726	-9.27406
30.1	-9.06995	-22.8782	-17.3357	-2.80854	-3.24889	-4.91506		30.1	-5.63531	-26.09	-16.307	-4.10925	0.933235	-9.33048
30.2	-7.67537	-23.519	-18.5755	-3.03842	-2.27618	-6.63104		30.2	-6.21684	-25.5314	-16.1008	-4.08719	1.16242	-9.26633
30.3	-6.03781	-24.3944	-19.5997	-3.61006	-0.7865	-8.8876		30.3	-6.96427	-25.0332	-15.9172	-3.93581	1.23929	-9.11379
30.4	-4.57314	-25.2308	-20.0729	-4.43365	0.995763	-11.0768		30.4	-7.74767	-24.6443	-15.7962	-3.72544	1.20063	-8.92348
30.5	-3.60893	-25.8273	-19.7369	-5.29945	2.81302	-12.669		30.5	-8.43107	-24.4116	-15.7382	-3.53693	1.12237	-8.75236
30.6	-3.4143	-26.0716	-18.5376	-5.90147	4.433	-13.3645		30.6	-8.9189	-24.3627	-15.7122	-3.43874	1.09302	-8.65503
30.7	-4.20907	-25.914	-16.6985	-5.95343	5.64254	-13.1507		30.7	-9.18478	-24.4939	-15.6741	-3.46939	1.18336	-8.67234
30.8	-6.04646	-25.3971	-14.6752	-5.29234	6.21064	-12.2355		30.8	-9.27204	-24.7629	-15.5824	-3.62964	1.42502	-8.816
30.9	-8.6995	-24.6678	-13	-3.99584	5.93728	-10.9312		30.9	-9.26843	-25.0943	-15.4036	-3.8869	1.80077	-9.05774
31	-11.6177	-23.9453	-12.0578	-2.43931	4.78873	-9.55402		31	-9.26926	-25.3979	-15.1123	-4.18983	2.24899	-9.33241
31.1	-14.0709	-23.4785	-11.9335	-1.17987	2.99539	-8.33703		31.1	-9.34512	-25.5944	-14.6949	-4.48506	2.68022	-9.55688
31.2	-15.4326	-23.4739	-12.4084	-0.705869	1.05247	-7.36727		31.2	-9.52455	-25.637	-14.159	-4.72875	3.00337	-9.65905
31.3	-15.4502	-24.0431	-13.0901	-1.21656	-0.435391	-6.65276		31.3	-9.79657	-25.5215	-13.5449	-4.89415	3.15136	-9.60185
31.4	-14.3417	-25.1407	-13.6198	-2.55787	-0.982318	-6.28596		31.4	-10.1232	-25.2819	-12.9256	-4.97693	3.09671	-9.39511
31.5	-12.6453	-26.5211	-13.7999	-4.32311	-0.418787	-6.42606		31.5	-10.4513	-24.9765	-12.3895	-4.99657	2.84925	-9.08677
31.6	-10.956	-27.7508	-13.6089	-6.02712	1.03835	-7.15902		31.6	-10.7185	-24.6713	-12.011	-4.99205	2.4447	-8.74026
31.7	-9.71433	-28.3499	-13.1109	-7.2944	2.85401	-8.33798		31.7	-10.8577	-24.4209	-11.8237	-5.01532	1.93639	-8.41164
31.8	-9.0841	-28.0398	-12.3838	-7.95833	4.37083	-9.58443		31.8	-10.8065	-24.2536	-11.811	-5.12028	1.39367	-8.13621
31.9	-8.96497	-26.8584	-11.4795	-8.05742	5.05479	-10.4471		31.9	-10.5255	-24.1665	-11.9176	-5.34439	0.89708	-7.92723
32	-9.08823	-25.1182	-10.4894	-7.75263	4.7069	-10.6245		32	-10.0147	-24.1294	-12.0739	-5.69024	0.523438	-7.78079
32.1	-9.19737	-23.2684	-9.63304	-7.24544	3.51172	-10.1043		32.1	-9.31772	-24.0939	-12.2191	-6.11824	0.322329	-7.68642
32.2	-9.1613	-21.7531	-9.20921	-6.70679	1.88396	-9.15455		32.2	-8.50995	-24.0031	-12.3135	-6.55648	0.294813	-7.63528
32.3	-8.99191	-20.8801	-9.42448	-6.23541	0.226083	-8.12272		32.3	-7.67582	-23.8016	-12.3412	-6.92241	0.386438	-7.61656
32.4	-8.75176	-20.7263	-10.2637	-5.87645	-1.23471	-7.26002		32.4	-6.88522	-23.449	-12.3047	-7.14754	0.500855	-7.60845
32.5	-8.41293	-21.1395	-11.4909	-5.688	-2.43059	-6.64889		32.5	-6.18007	-22.9347	-12.2213	-7.19908	0.529419	-7.57463
32.6	-7.82882	-21.8237	-12.7839	-5.78018	-3.28901	-6.2489		32.6	-5.57241	-22.2863	-12.1208	-7.08916	0.388412	-7.47318
32.7	-6.84164	-22.4646	-13.8698	-6.24911	-3.65334	-6.00144		32.7	-5.05282	-21.5624	-12.0424	-6.86751	0.0492874	-7.27328
32.8	-5.38746	-22.8481	-14.5915	-7.05932	-3.35651	-5.84755		32.8	-4.60311	-20.8328	-12.0311	-6.60143	-0.451674	-6.97196
32.9	-3.58314	-22.8707	-14.8752	-7.98195	-2.36639	-5.76297		32.9	-4.2078	-20.1585	-12.1272	-6.35297	-1.0314	-6.59861
33	-1.71819	-22.4994	-14.6962	-8.66656	-0.90317	-5.78329		33	-3.85623	-19.5771	-12.3524	-6.16115	-1.59373	-6.20805
33.1	-0.161392	-21.7151	-14.0899	-8.77876	0.575307	-5.9678		33.1	-3.53847	-19.0956	-12.6963	-6.03505	-2.06021	-5.86549
33.2	0.794902	-20.5276	-13.1795	-8.15037	1.52631	-6.28806		33.2	-3.24315	-18.6904	-13.1124	-5.95956	-2.38531	-5.63244
33.3	1.03137	-19.007	-12.1916	-6.90315	1.52393	-6.58411		33.3	-2.95991	-18.3198	-13.5261	-5.90911	-2.55451	-5.55472
33.4	0.615959	-17.3276	-11.4024	-5.42592	0.456897	-6.61343		33.4	-2.68541	-17.9393	-13.8554	-5.85523	-2.5765	-5.65496
33.5	-0.251007	-15.7328	-11.0508	-4.19023	-1.39429	-6.18609		33.5	-2.42965	-17.5136	-14.0367	-5.76447	-2.48143	-5.93042
33.6	-1.31995	-14.456	-11.2863	-3.53409	-3.46156	-5.32467		33.6	-2.217	-17.0241	-14.0401	-5.59454	-2.32501	-6.35198
33.7	-2.3679	-13.6542	-12.1233	-3.52871	-5.14846	-4.27747		33.7	-2.08297	-16.4692	-13.872	-5.29998	-2.18709	-6.87088
33.8	-3.2208	-13.385	-13.4614	-3.98459	-6.04784	-3.46484		33.8	-2.06504	-15.8611	-13.5712	-4.84932	-2.15808	-7.43011
33.9	-3.7593	-13.5672	-15.0567	-4.56312	-6.04616	-3.33109		33.9	-2.19045	-15.2244	-13.2005	-4.24674	-2.31373	-7.97565
34	-3.97147	-13.9916	-16.4982	-4.95193	-5.30071	-4.1608		34	-2.46492	-14.5983	-12.8361	-3.54381	-2.68819	-8.46672
34.1	-3.93674	-14.4274	-17.2957	-5.01884	-4.11115	-5.93876		34.1	-2.86531	-14.0354	-12.5527	-2.83013	-3.25838	-8.88666
34.2	-3.74637	-14.6704	-17.0893	-4.77206	-2.80436	-8.35309		34.2	-3.34146	-13.5938	-12.4052	-2.20201	-3.9482	-9.25118
34.3	-3.48086	-14.5863	-15.8666	-4.23725	-1.6728	-10.9317		34.3	-3.82899	-13.3235	-12.4131	-1.72616	-4.65117	-9.60894
34.4	-3.22667	-14.144	-13.9267	-3.36024	-0.994171	-13.1679		34.4	-4.26487	-13.2565	-12.5537	-1.41913	-5.26449	-10.0293
34.5	-3.10896	-13.4141	-11.7343	-2.05193	-1.01183	-14.6689		34.5	-4.60211	-13.397	-12.7676	-1.25228	-5.72027	-10.5759
34.6	-3.27825	-12.5322	-9.76128	-0.320719	-1.87335	-15.2697		34.6	-4.81951	-13.7175	-12.9739	-1.1743	-5.99987	-11.2782
34.7	-3.85023	-11.6763	-8.39451	1.57742	-3.54922	-15.0576		34.7	-4.92392	-14.1596	-13.0882	-1.13424	-6.12912	-12.109
34.8	-4.82745	-11.0715	-7.89502	3.17102	-5.79041	-14.3159		34.8	-4.94705	-14.6473	-13.0421	-1.09546	-6.15902	-12.9859
34.9	-6.01158	-10.9588	-8.36143	3.9822	-8.16703	-13.4271		34.9	-4.93584	-15.1077	-12.8029	-1.0385	-6.14302	-13.7965
35	-7.06319	-11.4992	-9.685	3.77488	-10.203	-12.7809		35	-4.94071	-15.4907	-12.3887	-0.955616	-6.12387	-14.4372
35.1	-7.67211	-12.7332	-11.5364	2.66355	-11.4935	-12.6954		35.1	-5.00619	-15.779	-11.8682	-0.848152	-6.12925	-14.8443
35.2	-7.66099	-14.5922	-13.4406	1.02927	-11.8209	-13.3319		35.2	-5.16597	-15.9875	-11.3377	-0.731651	-6.17338	-15.0056
35.3	-7.05299	-16.8451	-14.9235	-0.697756	-11.2098	-14.6177		35.3	-5.44024	-16.1511	-10.8904	-0.645295	-6.25585	-14.9575
35.4	-6.06364	-19.1026	-15.6296	-2.20295	-9.90152	-16.2155		35.4	-5.83076	-16.311	-10.5889	-0.653884	-6.3585	-14.7694
35.5	-4.99584	-20.9016	-15.4043	-3.3036	-8.24521	-17.5896		35.5	-6.31538	-16.5025	-10.452	-0.833209	-6.44463	-14.5214
35.6	-4.15257	-21.8581	-14.2738	-3.90387	-6.55441	-18.2384		35.6	-6.84694	-16.7444	-10.4557	-1.24004	-6.46323	-14.2829
35.7	-3.78084	-21.8185	-12.4317	-3.98353	-5.02879	-17.9399		35.7	-7.35971	-17.0292	-10.5423	-1.88227	-6.35992	-14.096
35.8	-4.01949	-20.9374	-10.2539	-3.60989	-3.78553	-16.8312		35.8	-7.78601	-17.3232	-10.6352	-2.70432	-6.09362	-13.969
35.9	-4.85963	-19.5724	-8.24049	-2.94518	-2.89588	-15.2743		35.9	-8.07831	-17.5734	-10.6589	-3.60085	-5.65191	-13.8766
36	-6.197	-18.1305	-6.84893	-2.25673	-2.42303	-13.6736		36	-8.22441	-17.7201	-10.562	-4.44982	-5.05973	-13.7658
36.1	-7.88937	-16.9245	-6.32272	-1.89219	-2.39602	-12.3504		36.1	-8.25049	-17.7068	-10.3336	-5.1466	-4.37826	-13.565
36.2	-9.74774	-16.1324	-6.60797	-2.19795	-2.75696	-11.4699		36.2	-8.20959	-17.4911	-10.0054	-5.62476	-3.69295	-13.1992
36.3	-11.5168	-15.7883	-7.43389	-3.36924	-3.33753	-11.0539		36.3	-8.16272	-17.0595	-9.63895	-5.86316	-3.09069	-12.6163
36.4	-12.8867	-15.7878	-8.4585	-5.33873	-3.8654	-11.0035		36.4	-8.15973	-16.4421	-9.30449	-5.88614	-2.63729	-11.8118
36.5	-13.5446	-15.9144	-9.36597	-7.74688	-4.03416	-11.1395		36.5	-8.22553	-15.7152	-9.06614	-5.75591	-2.36435	-10.8388
36.6	-13.2586	-15.9562	-9.94049	-9.99267	-3.63992	-11.2671		36.6	-8.3551	-14.9857	-8.97287	-5.55635	-2.26781	-9.79186
36.7	-12.0323	-15.7522	-10.0893	-11.4661	-2.69393	-11.2102		36.7	-8.51635	-14.3584	-9.05225	-5.37216	-2.31338	-8.77378
36.8	-10.1558	-15.2276	-9.88809	-11.769	-1.42636	-10.8129		36.8	-8.66011	-13.9064	-9.30511	-5.27134	-2.44682	-7.86429
36.9	-8.10445	-14.3668	-9.5575	-10.8159	-0.235922	-9.91709		36.9	-8.73203	-13.6522	-9.70253	-5.29348	-2.60403	-7.10199
37	-6.3577	-13.1783	-9.3451	-8.82645	0.440381	-8.40012		37	-8.6825	-13.5681	-10.1885	-5.4425	-2.72176	-6.48351
37.1	-5.26673	-11.7652	-9.39945	-6.25576	0.336965	-6.30532		37.1	-8.47491	-13.591	-10.6908	-5.68462	-2.74823	-5.977
37.2	-4.94511	-10.4043	-9.71854	-3.69428	-0.537359	-3.91313		37.2	-8.09363	-13.644	-11.1364	-5.95457	-2.65203	-5.53863
37.3	-5.27112	-9.50159	-10.2218	-1.68989	-1.91445	-1.69789		37.3	-7.55399	-13.6582	-11.4667	-6.16732	-2.42915	-5.12509
37.4	-5.98347	-9.41632	-10.8462	-0.591077	-3.38759	-0.14159		37.4	-6.90874	-13.5909	-11.6508	-6.23622	-2.10812	-4.70137
37.5	-6.76077	-10.2741	-11.6033	-0.47868	-4.56031	0.476104		37.5	-6.24572	-13.4326	-11.6923	-6.09916	-1.74635	-4.24584
37.6	-7.30356	-11.8885	-12.5392	-1.23114	-5.16426	0.187093		37.6	-5.66932	-13.2004	-11.6266	-5.73907	-1.41476	-3.75242
37.7	-7.4196	-13.8093	-13.605	-2.63317	-5.09561	-0.71447		37.7	-5.26806	-12.9288	-11.5058	-5.19224	-1.17659	-3.23241
37.8	-7.04744	-15.495	-14.5838	-4.42559	-4.39744	-1.83634		37.8	-5.08446	-12.6637	-11.3777	-4.54372	-1.06442	-2.71596
37.9	-6.21874	-16.5215	-15.1473	-6.31389	-3.20706	-2.85923		37.9	-5.10219	-12.4627	-11.2726	-3.90621	-1.06514	-2.25255
38	-5.03501	-16.6895	-15.0092	-7.95838	-1.70209	-3.6016		38	-5.2514	-12.3887	-11.2021	-3.38657	-1.12518	-1.90366
38.1	-3.71282	-16.0277	-14.0731	-8.95549	-0.0763411	-3.97315		38.1	-5.43192	-12.4907	-11.1669	-3.04976	-1.17195	-1.72773
38.2	-2.57533	-14.7718	-12.4958	-8.91825	1.4233	-3.93632		38.2	-5.54487	-12.7804	-11.1591	-2.90162	-1.14015	-1.75884
38.3	-1.98727	-13.2636	-10.6468	-7.6627	2.51017	-3.52314		38.3	-5.52163	-13.2209	-11.1595	-2.89549	-0.993555	-1.9917
38.4	-2.23353	-11.8054	-8.97185	-5.34447	2.94304	-2.82213		38.4	-5.34073	-13.7326	-11.1321	-2.95355	-0.734519	-2.38161
38.5	-3.33434	-10.6103	-7.83404	-2.47298	2.62257	-1.97256		38.5	-5.02838	-14.2167	-11.0244	-2.99209	-0.398708	-2.86031
38.6	-4.98324	-9.85942	-7.38062	0.208992	1.67103	-1.13754		38.6	-4.64481	-14.5845	-10.7797	-2.94046	-0.0412146	-3.35892
38.7	-6.65908	-9.76167	-7.55743	2.01124	0.427988	-0.522092		38.7	-4.2641	-14.7818	-10.3612	-2.75262	0.279878	-3.82501
38.8	-7.80345	-10.5082	-8.20136	2.578	-0.683652	-0.374154		38.8	-3.95386	-14.8004	-9.77379	-2.41318	0.516043	-4.2299
38.9	-8.01397	-12.1375	-9.12057	2.03146	-1.3324	-0.922422		38.9	-3.76143	-14.6739	-9.07134	-1.93909	0.633543	-4.56985
39	-7.19121	-14.4274	-10.0897	0.828569	-1.37393	-2.22677		39	-3.70429	-14.4637	-8.34222	-1.38039	0.614605	-4.86273
39.1	-5.58833	-16.9045	-10.8524	-0.48686	-0.895435	-4.10018		39.1	-3.7643	-14.2385	-7.68214	-0.815439	0.461062	-5.13914
39.2	-3.68549	-18.9732	-11.1377	-1.46567	-0.156697	-6.15233		39.2	-3.88559	-14.0566	-7.16383	-0.339439	0.197344	-5.43005
39.3	-1.99359	-20.1172	-10.7078	-1.88638	0.544519	-7.95078		39.3	-3.9833	-13.9584	-6.81607	-0.0462331	-0.131794	-5.75751
39.4	-0.898868	-20.0621	-9.44508	-1.75551	0.981782	-9.1908		39.4	-3.96715	-13.9634	-6.62115	-0.00611617	-0.469617	-6.13035
39.5	-0.575525	-18.8501	-7.46911	-1.23219	1.06113	-9.75997		39.5	-3.77083	-14.0695	-6.53303	-0.244362	-0.756633	-6.54606
39.6	-0.944647	-16.8379	-5.16188	-0.543521	0.807738	-9.74232		39.6	-3.37491	-14.2513	-6.50083	-0.732371	-0.941121	-6.99035
39.7	-1.76363	-14.538	-3.06756	0.101136	0.295423	-9.38082		39.7	-2.81537	-14.4595	-6.48326	-1.39631	-0.990925	-7.4362
39.8	-2.74146	-12.4539	-1.67818	0.54256	-0.398287	-8.95206		39.8	-2.17337	-14.6256	-6.4511	-2.14284	-0.9041	-7.84356
39.9	-3.59551	-10.9436	-1.27445	0.68586	-1.18694	-8.63526		39.9	-1.54962	-14.6748	-6.38482	-2.88549	-0.71422	-8.1626
40	-4.04913	-10.1717	-1.83546	0.429292	-1.97304	-8.46868		40	-1.035	-14.5456	-6.27377	-3.56217	-0.483342	-8.34099
40.1	-3.89463	-10.1354	-3.05996	-0.359964	-2.6523	-8.38884		40.1	-0.690196	-14.2109	-6.11921	-4.14414	-0.283188	-8.33652
40.2	-3.05979	-10.6954	-4.52027	-1.79099	-3.12042	-8.31089		40.2	-0.538225	-13.6909	-5.93853	-4.63329	-0.171579	-8.12866
40.3	-1.64579	-11.663	-5.88259	-3.84119	-3.20824	-8.20461		40.3	-0.565388	-13.0521	-5.76795	-5.05234	-0.172909	-7.72476
40.4	0.0715331	-12.8528	-7.01002	-6.28492	-2.70831	-8.07503		40.4	-0.728767	-12.3911	-5.65845	-5.43205	-0.271415	-7.16218
40.5	1.70876	-14.0474	-7.90265	-8.70899	-1.53031	-7.95355		40.5	-0.969471	-11.8079	-5.66306	-5.79993	-0.417695	-6.50381
40.6	2.89999	-14.9614	-8.57389	-10.6594	0.14362	-7.84768		40.6	-1.22527	-11.3779	-5.81708	-6.17251	-0.54382	-5.8223
40.7	3.41253	-15.2632	-8.96293	-11.7966	1.85403	-7.65039		40.7	-1.4404	-11.1331	-6.12062	-6.55411	-0.584195	-5.18037
40.8	3.16018	-14.709	-8.96459	-11.9903	3.0295	-7.13276		40.8	-1.57621	-11.0571	-6.53262	-6.93943	-0.497092	-4.61751
40.9	2.17625	-13.2839	-8.51019	-11.3592	3.24593	-6.07633		40.9	-1.6217	-11.0951	-6.98139	-7.31076	-0.275358	-4.14837
41	0.589911	-11.2773	-7.63616	-10.2019	2.44187	-4.41729		41	-1.59516	-11.1725	-7.38814	-7.63339	0.0577653	-3.7704
41.1	-1.36064	-9.20159	-6.54532	-8.87928	0.95917	-2.32444		41.1	-1.53689	-11.2175	-7.69076	-7.8544	0.462863	-3.47339
41.2	-3.35297	-7.61393	-5.6075	-7.68731	-0.613471	-0.196119		41.2	-1.49673	-11.1777	-7.85633	-7.91126	0.890271	-3.2449
41.3	-5.0366	-6.92351	-5.24036	-6.79748	-1.67902	1.45005		41.3	-1.51934	-11.0283	-7.88156	-7.7505	1.2797	-3.07398
41.4	-6.11224	-7.22761	-5.68578	-6.23271	-1.8487	2.20476		41.4	-1.63196	-10.7741	-7.78619	-7.34881	1.56625	-2.94932
41.5	-6.39858	-8.29218	-6.83834	-5.94466	-1.08466	1.96074		41.5	-1.83749	-10.4486	-7.60652	-6.7268	1.69826	-2.85498
41.6	-5.90432	-9.65148	-8.27852	-5.86451	0.293804	0.933398		41.6	-2.11229	-10.1147	-7.39096	-5.94928	1.65714	-2.77306
41.7	-4.82246	-10.817	-9.46459	-5.88341	1.79645	-0.49323		41.7	-2.40937	-9.85782	-7.19299	-5.11153	1.46766	-2.69155
41.8	-3.44341	-11.4523	-9.97474	-5.84456	3.01079	-1.96341		41.8	-2.66885	-9.76517	-7.05966	-4.31438	1.19286	-2.61302
41.9	-2.06929	-11.4604	-9.66469	-5.5482	3.76624	-3.26167		41.9	-2.83348	-9.89669	-7.01992	-3.63853	0.913231	-2.5603
42	-0.963031	-10.9855	-8.69744	-4.80781	4.05768	-4.32039		42	-2.86606	-10.2595	-7.07558	-3.12767	0.699374	-2.57243
42.1	-0.312849	-10.3142	-7.43878	-3.55205	3.91197	-5.16941		42.1	-2.76085	-10.8007	-7.19431	-2.78445	0.590067	-2.68825
42.2	-0.205805	-9.72521	-6.2815	-1.88017	3.34111	-5.83424		42.2	-2.54564	-11.4207	-7.31184	-2.57836	0.584275	-2.92518
42.3	-0.594026	-9.42733	-5.51947	-0.0853259	2.38772	-6.24388		42.3	-2.27353	-12.0064	-7.34786	-2.46082	0.64775	-3.26703
42.4	-1.25906	-9.58797	-5.29839	1.42118	1.15505	-6.2578		42.4	-2.00626	-12.4669	-7.23253	-2.37903	0.730631	-3.66792
42.5	-1.89016	-10.3415	-5.59909	2.25143	-0.191716	-5.74706		42.5	-1.79537	-12.76	-6.92937	-2.28548	0.789642	-4.06804
42.6	-2.23489	-11.7089	-6.24352	2.19243	-1.4257	-4.7413		42.6	-1.67022	-12.899	-6.44855	-2.14673	0.803004	-4.41125
42.7	-2.20881	-13.5131	-6.96066	1.28748	-2.31179	-3.5211		42.7	-1.63642	-12.9388	-5.84476	-1.95099	0.771835	-4.65971
42.8	-1.91458	-15.3695	-7.49155	-0.194668	-2.6764	-2.53061		42.8	-1.68162	-12.9494	-5.19916	-1.71239	0.709707	-4.79862
42.9	-1.56427	-16.8138	-7.62586	-1.85256	-2.4717	-2.16502		42.9	-1.78013	-12.9888	-4.59184	-1.46843	0.63333	-4.83138
43	-1.37805	-17.4639	-7.23833	-3.29393	-1.77748	-2.57776		43	-1.89402	-13.0853	-4.07628	-1.26929	0.562149	-4.7704
43.1	-1.48639	-17.1841	-6.29812	-4.23467	-0.769634	-3.60683		43.1	-1.97298	-13.2374	-3.66646	-1.16293	0.524141	-4.63364
43.2	-1.85507	-16.1205	-4.87782	-4.55414	0.324331	-4.85437		43.2	-1.96133	-13.422	-3.33847	-1.17891	0.558967	-4.44896
43.3	-2.31908	-14.6351	-3.1247	-4.27422	1.29699	-5.86864		43.3	-1.81394	-13.6041	-3.0432	-1.31342	0.713448	-4.25899
43.4	-2.69502	-13.1803	-1.29077	-3.52464	2.0236	-6.32779		43.4	-1.51317	-13.7433	-2.72613	-1.52359	1.02784	-4.12065
43.5	-2.86883	-12.1283	0.289712	-2.51701	2.48091	-6.18716		43.5	-1.0779	-13.7976	-2.34692	-1.73467	1.51607	-4.09167
43.6	-2.83754	-11.6411	1.31054	-1.4919	2.71007	-5.62313		43.6	-0.558946	-13.7278	-1.88901	-1.85956	2.1521	-4.20619
43.7	-2.63771	-11.6542	1.62695	-0.660586	2.75928	-4.8774		43.7	-0.0229361	-13.5072	-1.35745	-1.82398	2.87102	-4.45517
43.8	-2.24899	-11.9554	1.3258	-0.16669	2.70189	-4.13274		43.8	0.468891	-13.1327	-0.773329	-1.58752	3.58687	-4.78467
43.9	-1.54811	-12.3101	0.685514	-0.0719456	2.69497	-3.50925		43.9	0.878028	-12.6322	-0.166414	-1.15296	4.21636	-5.11319
44	-0.396005	-12.5659	0.0562073	-0.356984	2.97976	-3.10442		44	1.19706	-12.0623	0.428559	-0.56377	4.697	-5.3607
44.1	1.24659	-12.6833	-0.278736	-0.865472	3.78123	-3.02826		44.1	1.4451	-11.4919	0.971939	0.10748	4.99663	-5.48058
44.2	3.22281	-12.7084	-0.208861	-1.32153	5.15294	-3.3953		44.2	1.65541	-10.9812	1.41889	0.774778	5.11472	-5.47815
44.3	5.16479	-12.6319	0.202951	-1.39591	6.87421	-4.24857		44.3	1.86301	-10.5643	1.72822	1.35462	5.07701	-5.40764
44.4	6.61338	-12.3264	0.823931	-0.835598	8.50072	-5.46797		44.4	2.09596	-10.2441	1.88115	1.78086	4.92461	-5.34528
44.5	7.19759	-11.6201	1.5449	0.410213	9.54525	-6.76333		44.5	2.37087	-9.9979	1.89638	2.01594	4.70086	-5.35785
44.6	6.79678	-10.4465	2.30422	2.1671	9.69773	-7.76645		44.6	2.68957	-9.7897	1.82938	2.05607	4.44257	-5.47955
44.7	5.57729	-8.95648	3.07922	4.09374	8.9239	-8.1626		44.7	3.03886	-9.58342	1.752	1.92912	4.17563	-5.70443
44.8	3.9371	-7.49492	3.81642	5.78149	7.40127	-7.8146		44.8	3.38976	-9.35165	1.72262	1.68962	3.91187	-5.99225
44.9	2.36167	-6.4233	4.35964	6.85711	5.41802	-6.89221		44.9	3.69794	-9.07887	1.76445	1.4106	3.64643	-6.28385
45	1.2561	-5.95332	4.47339	7.06984	3.30449	-5.82745		45	3.90599	-8.7622	1.86194	1.16771	3.35572	-6.51795
45.1	0.834308	-6.09272	3.96795	6.33262	1.38254	-5.129		45.1	3.95243	-8.40812	1.97572	1.01878	3.00223	-6.64401
45.2	1.0912	-6.68531	2.88951	4.72904	-0.10992	-5.12713		45.2	3.78914	-8.03328	2.06362	0.983642	2.54814	-6.6318
45.3	1.83593	-7.45602	1.56948	2.50451	-1.09373	-5.83677		45.3	3.40175	-7.6667	2.09485	1.03623	1.97359	-6.47693
45.4	2.78029	-8.11481	0.487834	0.0216837	-1.63159	-6.94634		45.4	2.82269	-7.34958	2.05379	1.11591	1.29247	-6.1997
45.5	3.68887	-8.44863	0.0104944	-2.32493	-1.83609	-7.95572		45.5	2.12659	-7.12838	1.93738	1.14974	0.557493	-5.84052
45.6	4.41727	-8.37009	0.186047	-4.14335	-1.7889	-8.40209		45.6	1.40952	-7.04244	1.74803	1.07771	-0.151037	-5.45496
45.7	4.84305	-7.92861	0.767245	-5.1004	-1.53282	-8.06161		45.7	0.7596	-7.11144	1.4906	0.87309	-0.74778	-5.10775
45.8	4.78342	-7.29991	1.37855	-4.99453	-1.16069	-7.00795		45.8	0.231955	-7.32794	1.17668	0.551327	-1.16685	-4.85782
45.9	4.01226	-6.68895	1.72543	-3.85336	-0.856527	-5.53834		45.9	-0.163629	-7.65832	0.834253	0.16414	-1.37933	-4.73644
46	2.38882	-6.25978	1.69732	-1.99328	-0.845245	-4.04102		46	-0.459953	-8.04952	0.513783	-0.217243	-1.39732	-4.73127
46.1	0.0277715	-6.09449	1.3548	0.0584614	-1.26667	-2.83527		46.1	-0.715798	-8.44119	0.280767	-0.522583	-1.26423	-4.78768
46.2	-2.64641	-6.22901	0.846831	1.76478	-2.03381	-2.05027		46.2	-0.994004	-8.77991	0.19283	-0.701131	-1.03795	-4.83175
46.3	-5.03688	-6.68605	0.325267	2.74209	-2.79684	-1.66044		46.3	-1.34114	-9.03062	0.274041	-0.732208	-0.777185	-4.80299
46.4	-6.61287	-7.49564	-0.139763	2.8693	-3.12111	-1.6081		46.4	-1.77826	-9.18314	0.502877	-0.626723	-0.533583	-4.6783
46.5	-7.11161	-8.66778	-0.55978	2.30294	-2.74336	-1.91207		46.5	-2.30162	-9.25299	0.819171	-0.423541	-0.345881	-4.47743
46.6	-6.6083	-10.1038	-0.976994	1.38714	-1.70611	-2.64333		46.6	-2.88571	-9.27746	1.14312	-0.182967	-0.233656	-4.25017
46.7	-5.46881	-11.5699	-1.34792	0.487653	-0.307783	-3.7641		46.7	-3.4834	-9.30325	1.39868	0.0229544	-0.192831	-4.05596
46.8	-4.20321	-12.743	-1.48004	-0.150874	1.07674	-5.04107		46.8	-4.02714	-9.37112	1.53305	0.123557	-0.192999	-3.94369
46.9	-3.25816	-13.3438	-1.07177	-0.461737	2.15265	-6.08603		46.9	-4.43596	-9.50384	1.52763	0.065097	-0.180065	-3.93753
47	-2.89356	-13.2142	0.0745649	-0.53082	2.75298	-6.58593		47	-4.63244	-9.70278	1.39821	-0.174572	-0.0881852	-4.03473
47.1	-3.12103	-12.377	1.86841	-0.506627	2.80144	-6.45742		47.1	-4.56642	-9.95097	1.18518	-0.577681	0.138766	-4.21451
47.2	-3.74213	-11.0414	3.90071	-0.53168	2.30514	-5.83599		47.2	-4.23648	-10.2169	0.939812	-1.08667	0.522935	-4.44789
47.3	-4.47983	-9.55749	5.56306	-0.689255	1.40204	-4.98738		47.3	-3.69679	-10.4568	0.713686	-1.61828	1.04166	-4.7023
47.4	-5.08647	-8.34466	6.27433	-1.01065	0.374995	-4.19816		47.4	-3.04373	-10.6176	0.550825	-2.08836	1.63647	-4.93803
47.5	-5.37735	-7.73838	5.72317	-1.49386	-0.466666	-3.70646		47.5	-2.38771	-10.6499	0.482646	-2.43692	2.23524	-5.10401
47.6	-5.23126	-7.84262	4.00968	-2.14312	-0.859379	-3.62964		47.6	-1.82064	-10.5247	0.520413	-2.64153	2.77429	-5.14502
47.7	-4.56112	-8.51617	1.60523	-2.98709	-0.62537	-3.93638		47.7	-1.3925	-10.2491	0.645795	-2.71581	3.21221	-5.0179
47.8	-3.31247	-9.47634	-0.845381	-4.01592	0.295293	-4.48768		47.8	-1.10635	-9.86761	0.804518	-2.69456	3.53456	-4.71145
47.9	-1.52405	-10.4483	-2.7747	-5.08807	1.82435	-5.10646		47.9	-0.929037	-9.45088	0.915142	-2.61481	3.75283	-4.25485
48	0.572165	-11.2076	-3.84599	-5.91079	3.73405	-5.62786		48	-0.810364	-9.07795	0.894289	-2.50439	3.9008	-3.71247
48.1	2.56181	-11.5736	-3.9839	-6.16793	5.69716	-5.9331		48.1	-0.70038	-8.81615	0.686966	-2.38029	4.02664	-3.16852
48.2	3.99042	-11.4016	-3.32842	-5.68843	7.36836	-5.91956		48.2	-0.560178	-8.70241	0.288786	-2.25337	4.17965	-2.70558
48.3	4.54395	-10.6515	-2.13603	-4.53853	8.47299	-5.46489		48.3	-0.366936	-8.73147	-0.249621	-2.13308	4.39379	-2.3835
48.4	4.17144	-9.44261	-0.705896	-2.99069	8.85608	-4.46137		48.4	-0.115448	-8.86087	-0.837351	-2.02932	4.67879	-2.22301
48.5	3.07515	-8.05818	0.651455	-1.41357	8.5215	-2.88007		48.5	0.182637	-9.03193	-1.37248	-1.94805	5.01805	-2.20191
48.6	1.60646	-6.85765	1.62653	-0.100502	7.63248	-0.876357		48.6	0.499595	-9.19294	-1.7765	-1.88275	5.37224	-2.26343
48.7	0.120692	-6.1299	1.95517	0.824975	6.46358	1.1763		48.7	0.791174	-9.31262	-2.01725	-1.81127	5.6863	-2.33466
48.8	-1.10359	-6.03715	1.5139	1.37051	5.31695	2.76306		48.8	1.00229	-9.37823	-2.1116	-1.70473	5.89861	-2.34763
48.9	-1.8724	-6.59081	0.376228	1.57797	4.44454	3.41109		48.9	1.08202	-9.39066	-2.11075	-1.5462	5.95378	-2.25964
49	-2.09639	-7.62389	-1.20601	1.46834	4.00314	2.88271		49	1.00474	-9.35998	-2.0782	-1.34472	5.8152	-2.06509
49.1	-1.80136	-8.83868	-2.87859	1.03434	4.01537	1.27708		49.1	0.783093	-9.30675	-2.07111	-1.13616	5.47563	-1.7983
49.2	-1.10206	-9.93817	-4.26825	0.26998	4.37836	-0.978056		49.2	0.466196	-9.26351	-2.12922	-0.972783	4.96293	-1.52867
49.3	-0.163822	-10.7506	-5.08752	-0.761397	4.90801	-3.27096		49.3	0.123346	-9.27279	-2.27247	-0.907386	4.33883	-1.34943
49.4	0.827165	-11.2534	-5.26302	-1.87704	5.39589	-4.98228		49.4	-0.178873	-9.3772	-2.5023	-0.980031	3.68723	-1.3603
49.5	1.64437	-11.511	-4.9382	-2.80078	5.6342	-5.69845		49.5	-0.393501	-9.60267	-2.80289	-1.21205	3.09237	-1.64232
49.6	2.06486	-11.5637	-4.37868	-3.27686	5.43371	-5.32707		49.6	-0.500389	-9.94729	-3.14303	-1.60554	2.61359	-2.23003
49.7	1.92769	-11.4188	-3.83153	-3.21581	4.67202	-4.13198		49.7	-0.506759	-10.376	-3.48002	-2.14273	2.2697	-3.09254
49.8	1.24792	-11.0519	-3.43048	-2.74271	3.34124	-2.62582		49.8	-0.443175	-10.8273	-3.76425	-2.78644	2.03919	-4.13377
49.9	0.222505	-10.4968	-3.2079	-2.14297	1.59573	-1.38411		49.9	-0.354713	-11.232	-3.94521	-3.48312	1.8734	-5.21523
50	-0.843305	-9.91647	-3.124	-1.7611	-0.243046	-0.88114		50	-0.287255	-11.5373	-3.98265	-4.17097	1.71432	-6.19527
50.1	-1.657	-9.60033	-3.14116	-1.87894	-1.75358	-1.41436		50.1	-0.274813	-11.721	-3.86278	-4.79225	1.50994	-6.96991
50.2	-2.06259	-9.83307	-3.25567	-2.64854	-2.55568	-3.06471		50.2	-0.333212	-11.7897	-3.61012	-5.30797	1.22392	-7.49923
50.3	-2.0422	-10.6907	-3.48348	-4.04486	-2.48012	-5.67078		50.3	-0.463145	-11.7656	-3.28112	-5.7088	0.843907	-7.81389
50.4	-1.69642	-11.9884	-3.82718	-5.8643	-1.67563	-8.81474		50.4	-0.652248	-11.6747	-2.94342	-6.01845	0.385435	-7.99883
50.5	-1.21187	-13.3257	-4.21493	-7.7617	-0.529324	-11.8997		50.5	-0.872453	-11.5443	-2.65225	-6.28885	-0.110883	-8.16219
50.6	-0.791471	-14.2632	-4.45566	-9.36518	0.525937	-14.2898		50.6	-1.07722	-11.4035	-2.43762	-6.58369	-0.588352	-8.39868
50.7	-0.592543	-14.5037	-4.28235	-10.3752	1.18472	-15.5021		50.7	-1.20894	-11.2813	-2.30506	-6.95837	-0.985388	-8.76095
50.8	-0.654568	-14.0284	-3.51512	-10.6591	1.31107	-15.3835		50.8	-1.21568	-11.1987	-2.24417	-7.44594	-1.24666	-9.24836
50.9	-0.890546	-13.0609	-2.23037	-10.2916	0.903857	-14.1469		50.9	-1.0725	-11.1591	-2.2368	-8.04825	-1.33426	-9.81437
51	-1.15661	-11.9185	-0.792241	-9.5287	0.0456381	-12.2695		51	-0.796737	-11.1399	-2.25869	-8.73541	-1.23977	-10.3849
51.1	-1.3817	-10.844	0.329873	-8.69121	-1.06431	-10.3314		51.1	-0.443661	-11.0939	-2.27912	-9.45444	-0.993406	-10.8794
51.2	-1.57037	-9.96521	0.80275	-8.06471	-2.15982	-8.84252		51.2	-0.0869511	-10.9622	-2.26473	-10.1421	-0.662209	-11.2271
51.3	-1.67862	-9.34748	0.571257	-7.87366	-3.0037	-8.10422		51.3	0.205506	-10.694	-2.18686	-10.7395	-0.332124	-11.377
51.4	-1.55338	-9.0247	-0.182849	-8.22813	-3.44495	-8.15235		51.4	0.390932	-10.2667	-2.02962	-11.2082	-0.080453	-11.3036
51.5	-0.991258	-8.97396	-1.17692	-9.11227	-3.40837	-8.7843		51.5	0.460313	-9.69873	-1.7996	-11.5388	0.0465813	-11.0133
51.6	0.107825	-9.09313	-2.17282	-10.4318	-2.84589	-9.67013		51.6	0.435	-9.04922	-1.53402	-11.7543	0.042464	-10.5478
51.7	1.59081	-9.2427	-2.99876	-12.0002	-1.73233	-10.5032		51.7	0.352528	-8.40107	-1.29704	-11.9014	-0.0611807	-9.97779
51.8	3.03099	-9.27525	-3.51317	-13.5607	-0.147132	-11.113		51.8	0.249726	-7.83469	-1.15991	-12.0328	-0.207544	-9.3891
51.9	3.9397	-9.04953	-3.60303	-14.872	1.63246	-11.4717		51.9	0.149922	-7.40476	-1.1706	-12.189	-0.333157	-8.86259
52	4.02187	-8.4532	-3.23884	-15.7344	3.15023	-11.5813		52	0.0625905	-7.13295	-1.33266	-12.391	-0.388098	-8.45187
52.1	3.27536	-7.42856	-2.50349	-16.0215	3.93581	-11.3626		52.1	-0.011496	-7.01192	-1.60679	-12.639	-0.349983	-8.16899
52.2	1.94036	-6.06143	-1.54185	-15.7287	3.74908	-10.6525		52.2	-0.0771749	-7.01281	-1.93099	-12.9154	-0.226422	-7.98639
52.3	0.388014	-4.60788	-0.545207	-14.9853	2.68552	-9.35539		52.3	-0.149114	-7.09292	-2.24271	-13.1926	-0.0465361	-7.85033
52.4	-1.02287	-3.46188	0.232498	-14.0385	1.11472	-7.58831		52.4	-0.259249	-7.20402	-2.49498	-13.437	0.152366	-7.69861
52.5	-2.05659	-3.00993	0.513428	-13.1605	-0.450892	-5.69309		52.5	-0.455187	-7.30227	-2.66303	-13.606	0.330676	-7.47715
52.6	-2.63818	-3.43241	0.10084	-12.5252	-1.58432	-4.13919		52.6	-0.785967	-7.35661	-2.74603	-13.6521	0.443798	-7.15068
52.7	-2.85328	-4.60962	-0.973969	-12.1844	-2.08977	-3.31873		52.7	-1.27714	-7.35435	-2.76729	-13.5345	0.444333	-6.70445
52.8	-2.86632	-6.22325	-2.42504	-12.1256	-1.99832	-3.34911		52.8	-1.91303	-7.30389	-2.769	-13.2335	0.296773	-6.14142
52.9	-2.82984	-7.9077	-3.85748	-12.2801	-1.51186	-4.03368		52.9	-2.63644	-7.23537	-2.79799	-12.7616	-0.00251159	-5.48156
53	-2.79516	-9.36263	-4.94019	-12.5717	-0.903157	-4.99994		53	-3.36391	-7.19738	-2.88929	-12.1666	-0.413175	-4.76421
53.1	-2.77635	-10.3865	-5.48215	-12.9412	-0.386892	-5.83943		53.1	-4.01098	-7.24512	-3.05737	-11.5206	-0.859891	-4.05167
53.2	-2.86355	-10.8628	-5.46537	-13.2664	-0.0270418	-6.20495		53.2	-4.51689	-7.42026	-3.29415	-10.8988	-1.25685	-3.42176
53.3	-3.22313	-10.7634	-5.02976	-13.306	0.185386	-5.9054		53.3	-4.85838	-7.72892	-3.56848	-10.3544	-1.53523	-2.94813
53.4	-4.03244	-10.1664	-4.40966	-12.7839	0.190745	-4.95316		53.4	-5.05066	-8.13403	-3.8303	-9.90418	-1.6636	-2.67789
53.5	-5.31902	-9.23681	-3.87468	-11.561	-0.138029	-3.52714		53.5	-5.13844	-8.56773	-4.01969	-9.531	-1.65316	-2.61523
53.6	-6.87041	-8.1918	-3.63215	-9.75446	-0.876058	-1.90031		53.6	-5.17813	-8.9559	-4.08296	-9.20007	-1.54795	-2.71871
53.7	-8.27597	-7.28822	-3.73163	-7.71308	-1.93762	-0.363538		53.7	-5.21744	-9.23861	-3.98878	-8.87364	-1.40606	-2.91457
53.8	-9.09173	-6.78281	-4.05551	-5.90578	-3.04547	0.832195		53.8	-5.28265	-9.38026	-3.73636	-8.52301	-1.27744	-3.12078
53.9	-9.0599	-6.87292	-4.39929	-4.747	-3.8451	1.46071		53.9	-5.38239	-9.37158	-3.35537	-8.13306	-1.19106	-3.26982
54	-8.21236	-7.5854	-4.57046	-4.41371	-4.06274	1.35316		54	-5.51407	-9.22643	-2.90126	-7.6996	-1.15541	-3.32705
54.1	-6.82828	-8.70911	-4.43112	-4.78458	-3.61782	0.463404		54.1	-5.66589	-8.97661	-2.44436	-7.22776	-1.16943	-3.30035
54.2	-5.32534	-9.89674	-3.93744	-5.50655	-2.6331	-1.09901		54.2	-5.81709	-8.66404	-2.05224	-6.737	-1.22907	-3.23274
54.3	-4.13044	-10.8053	-3.11882	-6.18127	-1.40691	-3.0739		54.3	-5.93514	-8.33425	-1.77044	-6.26533	-1.32396	-3.18384
54.4	-3.52795	-11.2086	-2.04953	-6.55863	-0.301164	-5.07806		54.4	-5.9787	-8.03048	-1.60785	-5.86505	-1.43006	-3.21155
54.5	-3.53467	-11.0292	-0.823976	-6.57629	0.413763	-6.67871		54.5	-5.90811	-7.78599	-1.53657	-5.58792	-1.50604	-3.35484
54.6	-3.93831	-10.3159	0.433699	-6.3195	0.674761	-7.53916		54.6	-5.70098	-7.61372	-1.50719	-5.46672	-1.49859	-3.62323
54.7	-4.49084	-9.21507	1.53658	-5.94261	0.565204	-7.53357		54.7	-5.36628	-7.49765	-1.47174	-5.49937	-1.35856	-3.99644
54.8	-5.01479	-7.91898	2.23765	-5.57224	0.219132	-6.81242		54.8	-4.94602	-7.38914	-1.39849	-5.64408	-1.06148	-4.42999
54.9	-5.4445	-6.61569	2.30195	-5.24512	-0.26524	-5.7511		54.9	-4.50458	-7.21539	-1.2762	-5.82999	-0.622537	-4.86452
55	-5.7935	-5.44971	1.63632	-4.96326	-0.828631	-4.75595		55	-4.11017	-6.90096	-1.11295	-5.9792	-0.0976358	-5.23533
55.1	-6.03933	-4.56009	0.380963	-4.76543	-1.42225	-4.12182		55.1	-3.81309	-6.39239	-0.930704	-6.03004	0.431904	-5.4822
55.2	-6.05958	-4.07268	-1.11065	-4.75642	-1.94178	-3.99834		55.2	-3.62868	-5.67846	-0.75922	-5.95366	0.886303	-5.56076
55.3	-5.67032	-4.03541	-2.42051	-5.04325	-2.16774	-4.33612		55.3	-3.53441	-4.79704	-0.631741	-5.75624	1.21308	-5.45609
55.4	-4.75481	-4.35965	-3.23202	-5.65266	-1.81103	-4.92616		55.4	-3.48236	-3.82723	-0.581344	-5.4709	1.40054	-5.19277
55.5	-3.40191	-4.80975	-3.45294	-6.46075	-0.664925	-5.51242		55.5	-3.41946	-2.87105	-0.634923	-5.14487	1.47538	-4.83308
55.6	-1.91541	-5.02809	-3.15406	-7.20714	1.20533	-5.90973		55.6	-3.30339	-2.02878	-0.804671	-4.82669	1.48976	-4.4621
55.7	-0.707919	-4.63165	-2.49149	-7.57408	3.39926	-6.03372		55.7	-3.11163	-1.37552	-1.07829	-4.55716	1.50252	-4.1628
55.8	-0.123215	-3.3638	-1.65594	-7.32118	5.30551	-5.84045		55.8	-2.84383	-0.946202	-1.41383	-4.36458	1.5613	-3.99316
55.9	-0.275044	-1.25115	-0.839193	-6.3708	6.36907	-5.29576		55.9	-2.5187	-0.733827	-1.74588	-4.26287	1.69235	-3.97492
56	-0.995495	1.33161	-0.203599	-4.88283	6.31788	-4.40939		56	-2.16893	-0.695227	-2.00356	-4.25054	1.9	-4.09469
56.1	-1.92534	3.77548	0.117621	-3.20247	5.25404	-3.29876		56.1	-1.83659	-0.760977	-2.13283	-4.30841	2.17054	-4.30978
56.2	-2.64981	5.4576	0.0327731	-1.7255	3.60064	-2.20222		56.2	-1.56725	-0.851272	-2.1122	-4.39821	2.47344	-4.56167
56.3	-2.86905	5.93916	-0.477148	-0.77699	1.94706	-1.42439		56.3	-1.40304	-0.896538	-1.95802	-4.46637	2.76043	-4.79233
56.4	-2.51763	5.10354	-1.34913	-0.533684	0.809546	-1.22688		56.4	-1.37445	-0.856483	-1.71844	-4.45898	2.96804	-4.95828
56.5	-1.75483	3.1865	-2.41394	-0.990125	0.43601	-1.72437		56.5	-1.49265	-0.731774	-1.46218	-4.34296	3.0287	-5.03768
56.6	-0.891984	0.682652	-3.4022	-1.97135	0.734059	-2.86717		56.6	-1.74216	-0.566328	-1.26101	-4.12233	2.89033	-5.03128
56.7	-0.266243	-1.83933	-4.0085	-3.23418	1.3992	-4.4459		56.7	-2.07991	-0.440177	-1.16962	-3.84035	2.53907	-4.95999
56.8	-0.0931896	-3.90389	-3.99963	-4.55578	2.10783	-6.15793		56.8	-2.44619	-0.448963	-1.20933	-3.56648	2.01132	-4.86137
56.9	-0.409865	-5.19043	-3.30822	-5.74017	2.65735	-7.65487		56.9	-2.78496	-0.674338	-1.36463	-3.36818	1.38597	-4.78595
57	-1.09154	-5.57042	-2.06971	-6.56992	2.9816	-8.61829		57	-3.06405	-1.15664	-1.59164	-3.28387	0.759015	-4.78788
57.1	-1.96313	-5.12918	-0.611057	-6.81125	3.06788	-8.84729		57.1	-3.28611	-1.87608	-1.83405	-3.3111	0.212376	-4.90781
57.2	-2.9159	-4.12881	0.619986	-6.33517	2.86438	-8.33362		57.2	-3.48419	-2.75198	-2.03826	-3.41233	-0.210927	-5.15381
57.3	-3.92495	-2.90804	1.20232	-5.23483	2.23654	-7.25957		57.3	-3.70378	-3.66622	-2.16128	-3.53286	-0.51411	-5.4929
57.4	-4.94944	-1.81907	0.928457	-3.82343	1.04698	-5.92483		57.4	-3.98289	-4.49975	-2.17638	-3.62008	-0.735476	-5.85802
57.5	-5.86496	-1.21925	-0.102384	-2.5275	-0.665909	-4.62858		57.5	-4.33767	-5.16812	-2.07773	-3.63635	-0.925646	-6.16994
57.6	-6.50194	-1.4005	-1.51423	-1.71499	-2.60262	-3.61924		57.6	-4.75863	-5.6416	-1.8862	-3.56154	-1.12697	-6.36554
57.7	-6.75459	-2.49977	-2.84376	-1.51167	-4.31304	-3.12721		57.7	-5.21717	-5.943	-1.65154	-3.38884	-1.36705	-6.41814
57.8	-6.6698	-4.42373	-3.74153	-1.76928	-5.40426	-3.33168		57.8	-5.67659	-6.13108	-1.44455	-3.12345	-1.66466	-6.34409
57.9	-6.42484	-6.77276	-4.08814	-2.18837	-5.69222	-4.24093		57.9	-6.10351	-6.27566	-1.33951	-2.78995	-2.03293	-6.19508
58	-6.23644	-8.95114	-3.94866	-2.49794	-5.24909	-5.60639		58	-6.47305	-6.43499	-1.39062	-2.44097	-2.4749	-6.03704
58.1	-6.25056	-10.4386	-3.44052	-2.58274	-4.34457	-6.99141		58.1	-6.76279	-6.64544	-1.61224	-2.15439	-2.97408	-5.92574
58.2	-6.49972	-10.9834	-2.6706	-2.47273	-3.32721	-7.9314		58.2	-6.94358	-6.92254	-1.96968	-2.01602	-3.48411	-5.8894
58.3	-6.92337	-10.6797	-1.72519	-2.24808	-2.49883	-8.16978		58.3	-6.9796	-7.26427	-2.38623	-2.0926	-3.9286	-5.92468
58.4	-7.42244	-9.88844	-0.752522	-1.96235	-2.02327	-7.77122		58.4	-6.83918	-7.65088	-2.76706	-2.40448	-4.22009	-6.00687
58.5	-7.88848	-9.02767	-0.0103751	-1.61982	-1.97349	-7.05212		58.5	-6.5123	-8.0437	-3.03062	-2.91211	-4.29309	-6.10376
58.6	-8.21994	-8.38784	0.210567	-1.22868	-2.40202	-6.396		58.6	-6.02407	-8.38494	-3.13102	-3.5285	-4.1299	-6.18129
58.7	-8.34926	-8.02826	-0.284086	-0.900314	-3.27911	-6.08504		58.7	-5.43158	-8.60386	-3.06432	-4.15061	-3.76569	-6.2004
58.8	-8.24516	-7.83782	-1.47995	-0.878565	-4.44551	-6.16066		58.8	-4.80652	-8.63544	-2.85685	-4.69127	-3.27278	-6.11771
58.9	-7.84161	-7.70648	-3.14749	-1.4634	-5.62175	-6.44149		58.9	-4.21212	-8.4436	-2.54829	-5.09742	-2.73514	-5.89602
59	-6.99838	-7.61875	-4.87409	-2.88258	-6.43395	-6.64182		59	-3.68622	-8.0352	-2.17946	-5.35284	-2.2259	-5.51935
59.1	-5.56173	-7.62843	-6.15287	-5.12518	-6.50941	-6.52458		59.1	-3.23487	-7.45795	-1.78591	-5.46991	-1.79157	-5.00496
59.2	-3.47786	-7.79156	-6.57661	-7.82957	-5.62122	-6.02585		59.2	-2.83872	-6.78163	-1.3996	-5.4787	-1.44332	-4.40272
59.3	-0.944868	-8.07841	-5.99475	-10.3446	-3.84352	-5.26643		59.3	-2.46702	-6.07397	-1.05137	-5.41916	-1.15897	-3.7806
59.4	1.54525	-8.30083	-4.55051	-11.9903	-1.53891	-4.44516		59.4	-2.09401	-5.38465	-0.768439	-5.33624	-0.892783	-3.20358
59.5	3.40261	-8.14543	-2.60767	-12.3452	0.787414	-3.65659		59.5	-1.70687	-4.74168	-0.567094	-5.27161	-0.588039	-2.71336
59.6	4.20111	-7.30955	-0.561055	-11.3796	2.6871	-2.83512		59.6	-1.30496	-4.15793	-0.44247	-5.25128	-0.194711	-2.31865
59.7	3.86839	-5.69	1.29685	-9.40236	3.89089	-1.83765		59.7	-0.893754	-3.63808	-0.36551	-5.27649	0.314924	-2.00233
59.8	2.6898	-3.49581	2.82956	-6.92499	4.31256	-0.588127		59.8	-0.482517	-3.17774	-0.290678	-5.3218	0.940369	-1.73669
59.9	1.1731	-1.17007	4.01981	-4.46281	4.05635	0.813238		59.9	-0.088593	-2.75992	-0.173226	-5.33693	1.65058	-1.49562
60	-0.188828	0.817673	4.84192	-2.39756	3.42148	2.06838		60	0.255025	-2.35553	0.0105776	-5.25636	2.38166	-1.25812
60.1	-1.10351	2.1418	5.16746	-0.950123	2.81068	2.80478		60.1	0.497058	-1.92691	0.253895	-5.0173	3.04273	-1.00761
60.2	-1.54723	2.69066	4.79945	-0.21031	2.55163	2.75725		60.2	0.58094	-1.43881	0.5245	-4.58368	3.53893	-0.732228
60.3	-1.63861	2.54278	3.63343	-0.129902	2.77862	1.93781		60.3	0.474042	-0.873759	0.778769	-3.96349	3.80301	-0.428387
60.4	-1.51673	1.89534	1.83452	-0.554671	3.40748	0.624913		60.4	0.194165	-0.245797	0.977571	-3.21022	3.82044	-0.109051
60.5	-1.25473	0.99965	-0.171626	-1.30713	4.21828	-0.783091		60.5	-0.186081	0.393161	1.09437	-2.40927	3.6362	0.190597
60.6	-0.850571	0.119298	-1.87535	-2.23373	5.0108	-1.9257		60.6	-0.560532	0.962049	1.11616	-1.65466	3.34028	0.417455
60.7	-0.301673	-0.515777	-2.8774	-3.13977	5.63966	-2.54367		60.7	-0.824843	1.3774	1.04256	-1.02404	3.04046	0.514373
60.8	0.279784	-0.753727	-3.02822	-3.75552	5.91891	-2.48706		60.8	-0.91189	1.58556	0.886664	-0.561538	2.82822	0.437857
60.9	0.636701	-0.505122	-2.44021	-3.7655	5.61703	-1.76717		60.9	-0.810509	1.58278	0.67791	-0.274247	2.74912	0.176477
61	0.48112	0.219385	-1.39447	-2.97318	4.59191	-0.584904		61	-0.560803	1.4162	0.463697	-0.138496	2.79109	-0.236856
61.1	-0.272014	1.305	-0.227935	-1.44689	2.95035	0.720137		61.1	-0.232284	1.16612	0.305186	-0.111754	2.89576	-0.726856
61.2	-1.3553	2.52992	0.771966	0.460198	1.08369	1.77212		61.2	0.0992604	0.919777	0.263783	-0.147963	2.98446	-1.19732
61.3	-2.26309	3.55274	1.42452	2.2366	-0.444892	2.25889		61.3	0.369969	0.748833	0.381116	-0.208287	2.99025	-1.56347
61.4	-2.49727	3.98109	1.66725	3.42609	-1.1398	2.01894		61.4	0.537055	0.694917	0.661124	-0.262281	2.88197	-1.77886
61.5	-1.80347	3.56518	1.57847	3.79559	-0.784416	1.05947		61.5	0.581219	0.762784	1.06409	-0.283598	2.66858	-1.84666
61.6	-0.306708	2.36865	1.3695	3.39965	0.448281	-0.487524		61.6	0.505028	0.924571	1.51662	-0.252229	2.38945	-1.81508
61.7	1.53465	0.770363	1.29311	2.48639	2.07684	-2.37508		61.7	0.332189	1.13237	1.9332	-0.163362	2.10241	-1.76158
61.8	3.14149	-0.690056	1.52585	1.35764	3.52423	-4.22188		61.8	0.108608	1.33112	2.23912	-0.0377314	1.86932	-1.76844
61.9	4.03759	-1.56063	2.10476	0.2443	4.33092	-5.57275		61.9	-0.10101	1.47071	2.38678	0.0763146	1.74092	-1.89898
62	3.99765	-1.64509	2.92957	-0.745448	4.28658	-6.06008		62	-0.227672	1.51461	2.36529	0.112615	1.74484	-2.18393
62.1	3.08532	-1.0107	3.82919	-1.58018	3.50578	-5.5997		62.1	-0.222939	1.44562	2.20204	0.00778541	1.88146	-2.61858
62.2	1.58573	0.0830735	4.5885	-2.22503	2.37754	-4.44467		62.2	-0.081095	1.27252	1.95433	-0.276096	2.1264	-3.16656
62.3	-0.0997786	1.27304	4.97502	-2.59611	1.38318	-3.07826		62.3	0.152875	1.03491	1.69499	-0.736523	2.43616	-3.76996
62.4	-1.59692	2.23461	4.81564	-2.6065	0.894495	-2.00686		62.4	0.39765	0.796032	1.49208	-1.32948	2.75438	-4.36063
62.5	-2.65848	2.77892	4.05374	-2.24479	1.03933	-1.57751		62.5	0.565619	0.62256	1.38975	-1.98381	3.02237	-4.86954
62.6	-3.16418	2.8736	2.76031	-1.62977	1.65451	-1.88385		62.6	0.594707	0.562627	1.39716	-2.62265	3.19511	-5.23915
62.7	-3.08239	2.59239	1.11588	-1.0344	2.4091	-2.80399		62.7	0.466955	0.629431	1.49046	-3.1852	3.25383	-5.43982
62.8	-2.42525	2.05135	-0.593332	-0.829776	3.01687	-4.12407		62.8	0.208623	0.798075	1.62592	-3.63892	3.20942	-5.48046
62.9	-1.27485	1.35696	-2.00337	-1.32191	3.40628	-5.6169		62.9	-0.124053	1.01398	1.75472	-3.97992	3.0958	-5.4069
63	0.148259	0.610033	-2.78642	-2.58938	3.71909	-7.05679		63	-0.46469	1.20878	1.83031	-4.22785	2.95433	-5.28553
63.1	1.48021	-0.058248	-2.74166	-4.40117	4.12619	-8.23889		63.1	-0.75382	1.32186	1.81343	-4.4187	2.81788	-5.17957
63.2	2.3577	-0.495713	-1.87092	-6.28472	4.62518	-8.98196		63.2	-0.951012	1.31982	1.68043	-4.5976	2.70106	-5.12812
63.3	2.54877	-0.580367	-0.370157	-7.72398	5.00422	-9.13886		63.3	-1.03904	1.20199	1.43238	-4.81067	2.60001	-5.13803
63.4	2.02915	-0.248506	1.41918	-8.37385	5.01343	-8.65845		63.4	-1.02134	0.992457	1.10086	-5.09854	2.50095	-5.18883
63.5	0.969711	0.44561	3.11188	-8.20567	4.52245	-7.6334		63.5	-0.918246	0.72762	0.745281	-5.48844	2.39282	-5.24232
63.6	-0.354058	1.30632	4.40756	-7.469	3.57598	-6.26353		63.6	-0.768158	0.443697	0.438461	-5.98298	2.27467	-5.25143
63.7	-1.65785	2.02535	5.11921	-6.5425	2.35497	-4.80951		63.7	-0.631152	0.167896	0.241448	-6.54899	2.15346	-5.16731
63.8	-2.7055	2.30089	5.11422	-5.79482	1.10084	-3.53648		63.8	-0.583658	-0.0849658	0.179561	-7.11678	2.03454	-4.94795
63.9	-3.32948	2.00537	4.30146	-5.46949	0.0579292	-2.64341		63.9	-0.701072	-0.312384	0.232317	-7.59226	1.91174	-4.56918
64	-3.45204	1.23837	2.7141	-5.63747	-0.602826	-2.20358		64	-1.02931	-0.52194	0.341181	-7.88415	1.76646	-4.03327
64.1	-3.09332	0.231442	0.598814	-6.22871	-0.823351	-2.17528		64.1	-1.56149	-0.726327	0.430539	-7.93636	1.57819	-3.37262
64.2	-2.35771	-0.783083	-1.58207	-7.13858	-0.644739	-2.44106		64.2	-2.23355	-0.941071	0.432104	-7.74924	1.33955	-2.6466
64.3	-1.41155	-1.62863	-3.28461	-8.2581	-0.183592	-2.79327		64.3	-2.94625	-1.1888	0.305151	-7.37615	1.06446	-1.92745
64.4	-0.530891	-2.2343	-4.10006	-9.44157	0.400531	-2.95883		64.4	-3.59955	-1.50156	0.0439517	-6.89653	0.785456	-1.28303
64.5	-0.0961458	-2.63728	-3.94255	-10.4518	0.956313	-2.69407		64.5	-4.12205	-1.91452	-0.327194	-6.38546	0.54209	-0.766497
64.6	-0.467455	-2.94169	-3.05544	-10.9744	1.38459	-1.88781		64.6	-4.48664	-2.44853	-0.763744	-5.89255	0.369409	-0.412918
64.7	-1.84778	-3.25608	-1.88957	-10.6725	1.63139	-0.617687		64.7	-4.70906	-3.09352	-1.20527	-5.4339	0.28947	-0.239598
64.8	-4.09985	-3.6207	-0.890972	-9.36334	1.65647	0.871527		64.8	-4.83328	-3.8067	-1.57673	-4.99953	0.306231	-0.242718
64.9	-6.68927	-3.9703	-0.351825	-7.17232	1.42466	2.24924		64.9	-4.91246	-4.52412	-1.79642	-4.56883	0.40413	-0.39449
65	-8.87638	-4.23101	-0.343552	-4.54288	0.947302	3.20344		65	-4.99215	-5.17864	-1.79493	-4.12422	0.549587	-0.647546
65.1	-10.0868	-4.45983	-0.739021	-2.03137	0.336958	3.567		65.1	-5.10019	-5.7166	-1.54221	-3.65389	0.695029	-0.945121
65.2	-10.1364	-4.87136	-1.32851	-0.0521404	-0.220684	3.32181		65.2	-5.24559	-6.11115	-1.06809	-3.14844	0.787764	-1.23748
65.3	-9.23654	-5.71397	-1.90191	1.2192	-0.561227	2.51754		65.3	-5.41928	-6.36453	-0.458984	-2.59982	0.782813	-1.49832
65.4	-7.85584	-7.05279	-2.30214	1.837	-0.580601	1.20132		65.4	-5.59285	-6.50049	0.1704	-2.00755	0.653737	-1.73398
65.5	-6.48666	-8.66396	-2.39172	2.00221	-0.258128	-0.590035		65.5	-5.72117	-6.55272	0.71442	-1.38816	0.397858	-1.97931
65.6	-5.44116	-10.1188	-2.01327	1.91487	0.342852	-2.69645		65.6	-5.7485	-6.55559	1.10575	-0.783153	0.0333459	-2.2816
65.7	-4.79822	-10.9578	-1.02066	1.68445	1.06146	-4.78371		65.7	-5.62259	-6.53906	1.32504	-0.254785	-0.404794	-2.67891
65.8	-4.44799	-10.8953	0.624174	1.32959	1.64942	-6.47725		65.8	-5.31205	-6.52782	1.39425	0.131131	-0.868081	-3.18566
65.9	-4.19435	-9.9285	2.71417	0.856935	1.82777	-7.49983		65.9	-4.81879	-6.53892	1.36004	0.329863	-1.30029	-3.78805
66	-3.88328	-8.33598	4.7754	0.334655	1.39291	-7.76337		66	-4.17833	-6.57471	1.27557	0.333322	-1.6481	-4.45032
66.1	-3.48373	-6.54167	6.25468	-0.114997	0.316363	-7.39319		66.1	-3.452	-6.61407	1.19003	0.169248	-1.87631	-5.12492
66.2	-3.04684	-4.94863	6.75697	-0.383314	-1.23798	-6.70027		66.2	-2.71234	-6.60943	1.14215	-0.110589	-1.98185	-5.76017
66.3	-2.64892	-3.82952	6.1929	-0.444727	-2.96536	-6.05844		66.3	-2.02428	-6.49731	1.15716	-0.448298	-1.99951	-6.30292
66.4	-2.31239	-3.30492	4.76299	-0.387416	-4.56532	-5.75648		66.4	-1.43295	-6.22036	1.24307	-0.796594	-1.99352	-6.69949
66.5	-1.95932	-3.33964	2.83705	-0.381093	-5.7919	-5.88285		66.5	-0.958834	-5.75434	1.38672	-1.12627	-2.03655	-6.90671
66.6	-1.41009	-3.77934	0.824744	-0.611733	-6.45122	-6.36552		66.6	-0.598386	-5.12804	1.55197	-1.42305	-2.186	-6.9093
66.7	-0.49091	-4.41959	-0.925158	-1.16445	-6.40023	-7.03716		66.7	-0.330331	-4.42312	1.68337	-1.67995	-2.46717	-6.73002
66.8	0.800968	-5.06839	-2.17495	-1.97256	-5.57579	-7.69161		66.8	-0.126896	-3.75096	1.71989	-1.89073	-2.86674	-6.42814
66.9	2.21125	-5.54032	-2.78272	-2.8414	-4.10029	-8.14627		66.9	0.0379519	-3.21542	1.61565	-2.05027	-3.33859	-6.08628
67	3.33763	-5.63521	-2.71581	-3.53802	-2.35538	-8.28181		67	0.185785	-2.88089	1.35902	-2.16119	-3.82215	-5.78954
67.1	3.84134	-5.14674	-2.04701	-3.90405	-0.880796	-8.02534		67.1	0.331743	-2.75778	0.979507	-2.24115	-4.26435	-5.60234
67.2	3.56582	-3.95573	-0.931341	-3.91882	-0.15639	-7.33181		67.2	0.483847	-2.80548	0.538724	-2.32432	-4.63714	-5.55187
67.3	2.61886	-2.19652	0.428827	-3.68964	-0.388565	-6.21914		67.3	0.641987	-2.94928	0.111711	-2.45271	-4.94007	-5.62557
67.4	1.32939	-0.310656	1.78863	-3.36075	-1.47924	-4.82772		67.4	0.7947	-3.10608	-0.234816	-2.6589	-5.19339	-5.78503
67.5	0.108935	1.0884	2.85794	-3.03772	-3.13049	-3.42951		67.5	0.914232	-3.20726	-0.460133	-2.94707	-5.42958	-5.98476
67.6	-0.735952	1.49818	3.33506	-2.72634	-4.96486	-2.36784		67.6	0.957298	-3.21089	-0.558562	-3.28789	-5.69012	-6.18754
67.7	-1.08087	0.768133	3.00331	-2.3775	-6.62864	-1.95174		67.7	0.875337	-3.10448	-0.557671	-3.62816	-6.02491	-6.37098
67.8	-0.970568	-0.854615	1.89187	-2.00074	-7.90409	-2.3487		67.8	0.631889	-2.90326	-0.508744	-3.91314	-6.48389	-6.52616
67.9	-0.565546	-2.85582	0.305307	-1.74265	-8.75541	-3.5178		67.9	0.219001	-2.64625	-0.472339	-4.11102	-7.09744	-6.6526
68	-0.063147	-4.64033	-1.30042	-1.85847	-9.30284	-5.20047		68	-0.336519	-2.39396	-0.502122	-4.22499	-7.85686	-6.75646
68.1	0.375974	-5.74954	-2.49624	-2.5701	-9.71498	-7.0094		68.1	-0.976927	-2.22249	-0.631321	-4.28915	-8.70829	-6.85269
68.2	0.636808	-6.00527	-3.0539	-3.88627	-10.0984	-8.59368		68.2	-1.62975	-2.20719	-0.869767	-4.35245	-9.56683	-6.96952
68.3	0.621941	-5.49933	-3.00565	-5.51078	-10.4665	-9.761		68.3	-2.23086	-2.39812	-1.20582	-4.45949	-10.3419	-7.14703
68.4	0.241215	-4.48141	-2.59845	-6.95839	-10.8294	-10.4843		68.4	-2.74294	-2.79842	-1.61005	-4.63748	-10.9605	-7.42829
68.5	-0.592363	-3.25944	-2.1598	-7.75714	-11.2671	-10.8102		68.5	-3.16154	-3.35851	-2.03779	-4.89534	-11.3843	-7.84159
68.6	-1.92737	-2.11958	-1.95096	-7.68602	-11.903	-10.7843		68.6	-3.50814	-3.99129	-2.43137	-5.22729	-11.6169	-8.38034
68.7	-3.68145	-1.266	-2.09693	-6.90189	-12.7856	-10.4313		68.7	-3.81589	-4.60052	-2.73063	-5.61302	-11.6983	-8.99543
68.8	-5.6025	-0.857763	-2.55332	-5.84156	-13.791	-9.79092		68.8	-4.11654	-5.10985	-2.88838	-6.01489	-11.6903	-9.60589
68.9	-7.32111	-1.04077	-3.12773	-5.00965	-14.6306	-8.96781		68.9	-4.43441	-5.48293	-2.88584	-6.37732	-11.6549	-10.1246
69	-8.47922	-1.93644	-3.62476	-4.76571	-14.9838	-8.20515		69	-4.7854	-5.72692	-2.74057	-6.63624	-11.6369	-10.4855
69.1	-8.88946	-3.55637	-3.92425	-5.18048	-14.655	-7.84549		69.1	-5.17485	-5.88068	-2.50171	-6.73948	-11.6574	-10.6597
69.2	-8.59636	-5.71679	-4.01399	-6.06345	-13.6465	-8.21086		69.2	-5.59383	-5.99562	-2.23459	-6.66648	-11.7135	-10.6574
69.3	-7.85218	-8.02331	-3.9366	-7.1099	-12.17	-9.39405		69.3	-6.01569	-6.11809	-1.99969	-6.4382	-11.7822	-10.5179
69.4	-6.97309	-9.98921	-3.68754	-8.02078	-10.582	-11.1105		69.4	-6.3953	-6.27792	-1.83466	-6.11629	-11.8231	-10.296
69.5	-6.20235	-11.2115	-3.19539	-8.55811	-9.28817	-12.8051		69.5	-6.67517	-6.48732	-1.74868	-5.78572	-11.7849	-10.047
69.6	-5.67646	-11.5145	-2.37656	-8.5745	-8.61966	-13.8957		69.6	-6.80119	-6.74839	-1.72673	-5.52431	-11.6172	-9.8174
69.7	-5.46697	-10.9826	-1.25715	-8.01969	-8.70132	-14.0187		69.7	-6.7425	-7.05684	-1.74033	-5.37297	-11.2859	-9.64101
69.8	-5.59087	-9.89735	-0.026795	-6.97169	-9.40931	-13.1441		69.8	-6.50854	-7.39801	-1.7607	-5.3211	-10.7869	-9.54007
69.9	-5.98383	-8.61921	1.00681	-5.64148	-10.4465	-11.5562		69.9	-6.1516	-7.73793	-1.76577	-5.31267	-10.1538	-9.52124
70	-6.5008	-7.45332	1.53532	-4.26978	-11.4208	-9.72074		70	-5.7503	-8.02152	-1.74068	-5.27253	-9.4531	-9.56633
70.1	-6.93037	-6.56345	1.39484	-3.07754	-11.9976	-8.11294		70.1	-5.3832	-8.18242	-1.67412	-5.13932	-8.77157	-9.62242
70.2	-7.04579	-5.97655	0.645732	-2.28469	-11.9624	-7.03799		70.2	-5.10576	-8.16342	-1.55798	-4.88883	-8.19284	-9.60683
70.3	-6.68516	-5.67945	-0.489313	-2.06634	-11.2528	-6.55187		70.3	-4.94265	-7.93637	-1.39174	-4.53964	-7.77278	-9.43483
70.4	-5.82364	-5.70412	-1.72365	-2.45788	-9.93469	-6.52771		70.4	-4.8901	-7.51508	-1.18926	-4.14365	-7.5205	-9.05453
70.5	-4.60485	-6.1014	-2.78458	-3.26878	-8.15853	-6.79231		70.5	-4.92187	-6.95348	-0.983522	-3.76847	-7.39535	-8.47202
70.6	-3.34377	-6.84063	-3.47399	-4.12793	-6.14909	-7.25179		70.6	-4.99468	-6.32822	-0.820589	-3.47762	-7.3233	-7.75286
70.7	-2.41121	-7.71517	-3.7109	-4.62241	-4.21956	-7.88507		70.7	-5.05605	-5.71277	-0.745019	-3.3142	-7.22356	-6.99899
70.8	-2.06739	-8.37734	-3.49785	-4.49805	-2.74381	-8.612		70.8	-5.05479	-5.15651	-0.782093	-3.29264	-7.03214	-6.31417
70.9	-2.3557	-8.4521	-2.88249	-3.79888	-2.06059	-9.16442		70.9	-4.9514	-4.67771	-0.923486	-3.40212	-6.7162	-5.77374
71	-3.13568	-7.70033	-1.96211	-2.85151	-2.33152	-9.12899		71	-4.72686	-4.27078	-1.12462	-3.61493	-6.27575	-5.40725
71.1	-4.20021	-6.12928	-0.861504	-2.08455	-3.44095	-8.18649		71.1	-4.38721	-3.92018	-1.31821	-3.89154	-5.74006	-5.19907
71.2	-5.30902	-4.04968	0.246724	-1.82638	-4.99946	-6.34009		71.2	-3.96421	-3.60819	-1.43431	-4.18218	-5.1601	-5.1015
71.3	-6.21655	-1.96714	1.12103	-2.19636	-6.49212	-3.99307		71.3	-3.51284	-3.31424	-1.41735	-4.43082	-4.59966	-5.05304
71.4	-6.70466	-0.353193	1.5127	-3.0753	-7.4765	-1.79285		71.4	-3.10194	-3.01192	-1.23874	-4.58606	-4.12844	-4.99359
71.5	-6.63419	0.56531	1.2579	-4.19353	-7.7138	-0.328342		71.5	-2.7948	-2.67114	-0.902822	-4.61321	-3.81214	-4.87165
71.6	-5.96249	0.837213	0.376545	-5.27495	-7.19225	0.0857871		71.6	-2.62506	-2.26903	-0.44333	-4.50511	-3.69563	-4.64878
71.7	-4.74312	0.686266	-0.868355	-6.13088	-6.04976	-0.533408		71.7	-2.58127	-1.80447	0.0858589	-4.28523	-3.7831	-4.30809
71.8	-3.11314	0.354295	-2.02448	-6.69534	-4.50987	-1.88262		71.8	-2.60966	-1.30772	0.623349	-3.99824	-4.02901	-3.86796
71.9	-1.27169	-0.0163235	-2.64534	-6.98711	-2.8557	-3.49892		71.9	-2.63389	-0.835606	1.11743	-3.69195	-4.34856	-3.38813
72	0.505756	-0.375603	-2.46295	-7.00724	-1.39348	-4.89315		72	-2.57972	-0.453984	1.538	-3.40343	-4.64372	-2.95718
72.1	1.84967	-0.706893	-1.43536	-6.68465	-0.407285	-5.70403		72.1	-2.40085	-0.211142	1.8788	-3.15329	-4.83247	-2.66583
72.2	2.38048	-0.962116	0.251829	-5.90787	-0.147807	-5.78154		72.2	-2.09496	-0.116779	2.15305	-2.94417	-4.87014	-2.57456
72.3	1.87759	-1.04728	2.23663	-4.5895	-0.771969	-5.17887		72.3	-1.70384	-0.138047	2.38899	-2.76361	-4.75738	-2.69217
72.4	0.474305	-0.87936	4.10046	-2.78476	-2.23886	-4.09626		72.4	-1.29727	-0.214159	2.62744	-2.59228	-4.53417	-2.97569
72.5	-1.32294	-0.479734	5.49837	-0.760068	-4.23082	-2.8202		72.5	-0.951448	-0.27909	2.91533	-2.41344	-4.26571	-3.34799
72.6	-2.83829	-0.00731628	6.25484	1.07985	-6.24099	-1.68235		72.6	-0.729188	-0.282809	3.29212	-2.21981	-4.02902	-3.72052
72.7	-3.54754	0.325533	6.43731	2.3555	-7.76383	-0.971852		72.7	-0.667132	-0.200108	3.7715	-2.01413	-3.89806	-4.01523
72.8	-3.27933	0.358301	6.28819	2.82028	-8.45883	-0.860258		72.8	-0.772955	-0.0273416	4.33069	-1.80417	-3.92389	-4.18159
72.9	-2.26834	0.0786276	6.04035	2.42606	-8.20822	-1.38726		72.9	-1.0291	0.222629	4.91113	-1.59863	-4.11805	-4.20869
73	-1.01634	-0.362975	5.78327	1.35857	-7.13247	-2.44147		73	-1.39372	0.525212	5.42996	-1.40593	-4.44603	-4.1262
73.1	-0.0556179	-0.714751	5.52361	-0.00581238	-5.55949	-3.79211		73.1	-1.79756	0.848317	5.80222	-1.23791	-4.83525	-3.99505
73.2	0.277455	-0.728592	5.3115	-1.28081	-3.91921	-5.14821		73.2	-2.14819	1.15695	5.96996	-1.11583	-5.19225	-3.88937
73.3	-0.083533	-0.266614	5.27068	-2.23462	-2.62842	-6.24328		73.3	-2.35146	1.41641	5.92245	-1.07321	-5.42676	-3.87416
73.4	-0.964697	0.623039	5.53716	-2.83933	-2.02606	-6.86646		73.4	-2.34269	1.59643	5.69579	-1.14708	-5.47341	-3.98562
73.5	-2.05818	1.76022	6.12494	-3.19869	-2.28356	-6.89267		73.5	-2.11157	1.67543	5.3559	-1.36014	-5.30365	-4.22137
73.6	-3.07067	2.9207	6.86093	-3.41787	-3.29488	-6.327		73.6	-1.70628	1.64441	4.97082	-1.70333	-4.93014	-4.54678
73.7	-3.84875	3.8739	7.40447	-3.51298	-4.69407	-5.35386		73.7	-1.2159	1.51333	4.58932	-2.12759	-4.4045	-4.91041
73.8	-4.3488	4.43701	7.38479	-3.40871	-5.98307	-4.30183		73.8	-0.738427	1.31474	4.23638	-2.55312	-3.80846	-5.25561
73.9	-4.48482	4.53067	6.58025	-3.0516	-6.7645	-3.55193		73.9	-0.349939	1.09739	3.923	-2.89547	-3.23632	-5.52948
74	-4.0831	4.19954	5.08816	-2.51412	-6.84094	-3.38236		74	-0.0855331	0.909068	3.65508	-3.0952	-2.77167	-5.68887
74.1	-2.9813	3.53147	3.29291	-2.06017	-6.22562	-3.83771		74.1	0.0626111	0.776282	3.43214	-3.13444	-2.4655	-5.70451
74.2	-1.17392	2.58062	1.64515	-2.01584	-5.02372	-4.71496		74.2	0.134732	0.693275	3.242	-3.03535	-2.32445	-5.56682
74.3	1.09087	1.33559	0.476696	-2.54224	-3.35521	-5.69002		74.3	0.184181	0.627333	3.05612	-2.84614	-2.31037	-5.29449
74.4	3.34228	-0.2018	-0.109065	-3.47867	-1.41414	-6.50383		74.4	0.257509	0.534119	2.83311	-2.62408	-2.35266	-4.93652
74.5	5.05721	-1.87008	-0.197299	-4.39213	0.477127	-7.04195		74.5	0.383098	0.376597	2.53156	-2.42403	-2.37314	-4.55929
74.6	5.84866	-3.29736	0.0403125	-4.80794	1.92442	-7.25567		74.6	0.571567	0.140112	2.12922	-2.29343	-2.31149	-4.22383
74.7	5.58794	-4.05791	0.455811	-4.46142	2.59385	-7.09731		74.7	0.821546	-0.164415	1.63701	-2.26827	-2.13948	-3.96632
74.8	4.43929	-3.91626	0.968958	-3.40119	2.33969	-6.50174		74.8	1.12082	-0.507121	1.10014	-2.36434	-1.86153	-3.78807
74.9	2.79591	-2.98594	1.52158	-1.94791	1.28564	-5.41416		74.9	1.44381	-0.850252	0.580892	-2.57037	-1.50842	-3.65634
75	1.14252	-1.67773	2.03833	-0.550211	-0.230581	-3.90255		75	1.75179	-1.15721	0.135181	-2.84406	-1.12613	-3.51723
75.1	-0.124062	-0.497983	2.37715	0.377284	-1.78678	-2.23682		75.1	1.99756	-1.39714	-0.203157	-3.11631	-0.765432	-3.31688
75.2	-0.811601	0.175593	2.33366	0.576441	-3.00244	-0.807053		75.2	2.13565	-1.54478	-0.425346	-3.30727	-0.474835	-3.02098
75.3	-0.935665	0.24282	1.73474	-0.0170124	-3.64299	0.0858044		75.3	2.13588	-1.58148	-0.541966	-3.34931	-0.292792	-2.62213
75.4	-0.644782	-0.146346	0.564561	-1.29294	-3.64611	0.349046		75.4	1.995	-1.50394	-0.574723	-3.21199	-0.238008	-2.13628
75.5	-0.0991415	-0.739935	-0.98274	-2.98086	-3.05877	0.0757535		75.5	1.74294	-1.33761	-0.55072	-2.91545	-0.302832	-1.59747
75.6	0.602908	-1.29534	-2.54652	-4.68482	-2.03942	-0.521706		75.6	1.43873	-1.14097	-0.501705	-2.52171	-0.452683	-1.05151
75.7	1.40764	-1.63369	-3.73905	-6.0167	-0.838105	-1.14289		75.7	1.1541	-0.992532	-0.462875	-2.11031	-0.631848	-0.551158
75.8	2.25436	-1.68676	-4.28417	-6.7128	0.273258	-1.47293		75.8	0.951969	-0.963251	-0.463245	-1.75025	-0.778912	-0.151979
75.9	3.00419	-1.49828	-4.1066	-6.64417	1.10824	-1.30895		75.9	0.868751	-1.08979	-0.515325	-1.47922	-0.843182	0.0950133
76	3.43838	-1.17432	-3.30052	-5.78855	1.58493	-0.659789		76	0.909426	-1.36008	-0.605545	-1.29611	-0.799367	0.158093
76.1	3.34626	-0.825636	-2.0916	-4.19327	1.68059	0.276686		76.1	1.05179	-1.71593	-0.691589	-1.16594	-0.654312	0.0401062
76.2	2.66212	-0.551981	-0.754165	-2.05784	1.40846	1.21745		76.2	1.25613	-2.07369	-0.70954	-1.03372	-0.442295	-0.217399
76.3	1.56379	-0.46959	0.448354	0.233317	0.822396	1.9042		76.3	1.47663	-2.35425	-0.589376	-0.839504	-0.212219	-0.545299
76.4	0.416309	-0.71518	1.28906	2.23219	0.0463833	2.18405		76.4	1.67025	-2.50666	-0.27709	-0.534866	-0.0157891	-0.865973
76.5	-0.399429	-1.39274	1.62907	3.59249	-0.706112	2.00416		76.5	1.80247	-2.51974	0.243	-0.101127	0.104638	-1.11364
76.6	-0.640324	-2.48816	1.51529	4.17325	-1.21445	1.37187		76.6	1.85185	-2.42039	0.939003	0.443496	0.125687	-1.25204
76.7	-0.272186	-3.82884	1.15298	4.05724	-1.32317	0.296324		76.7	1.81246	-2.25986	1.73967	1.05043	0.0474904	-1.28339
76.8	0.567413	-5.0929	0.843399	3.49011	-1.04193	-1.16448		76.8	1.69745	-2.09477	2.55564	1.65463	-0.108555	-1.2422
76.9	1.60852	-5.87387	0.87091	2.78941	-0.536504	-2.81282		76.9	1.54266	-1.97133	3.30497	2.18645	-0.305853	-1.17867
77	2.53813	-5.83922	1.42957	2.23064	-0.038697	-4.29178		77	1.40536	-1.91577	3.93467	2.57794	-0.497227	-1.14037
77.1	3.10378	-4.91585	2.60735	2.00878	0.265184	-5.22527		77.1	1.35212	-1.93275	4.42936	2.77217	-0.628896	-1.15892
77.2	3.19242	-3.33092	4.32613	2.19799	0.280535	-5.3757		77.2	1.43721	-2.00603	4.8078	2.737	-0.64475	-1.24244
77.3	2.85062	-1.51765	6.29501	2.68874	0.00782966	-4.73201		77.3	1.67983	-2.10049	5.11045	2.47627	-0.496169	-1.37842
77.4	2.2471	0.0552317	8.09298	3.2419	-0.480269	-3.49565		77.4	2.05224	-2.16646	5.38234	2.03357	-0.158145	-1.54073
77.5	1.5848	1.04223	9.32714	3.60501	-1.05608	-2.00591		77.5	2.48667	-2.14688	5.65626	1.48661	0.357749	-1.69648
77.6	1.04894	1.30822	9.7649	3.62737	-1.54453	-0.608713		77.6	2.89747	-1.98818	5.9463	0.930361	0.999728	-1.80786
77.7	0.806977	0.924263	9.43819	3.25239	-1.76913	0.420122		77.7	3.20659	-1.65693	6.24912	0.452576	1.69025	-1.83388
77.8	1.01224	0.118836	8.61315	2.46192	-1.57277	0.927824		77.8	3.36512	-1.15674	6.55046	0.110736	2.34828	-1.73839
77.9	1.75687	-0.840606	7.65566	1.24415	-0.82992	0.902107		77.9	3.36395	-0.535432	6.82694	-0.0806161	2.91096	-1.50494
78	3.01046	-1.71539	6.88185	-0.364612	0.552879	0.484444		78	3.23281	0.125176	7.03997	-0.149627	3.34361	-1.1467
78.1	4.54085	-2.32092	6.4341	-2.20024	2.57226	-0.127723		78.1	3.02985	0.732999	7.13574	-0.152159	3.64051	-0.707592
78.2	5.93146	-2.51423	6.25114	-3.93333	5.0403	-0.755117		78.2	2.82345	1.21199	7.05927	-0.146254	3.81996	-0.252831
78.3	6.74502	-2.15542	6.17199	-5.1251	7.55575	-1.27589		78.3	2.67267	1.51971	6.77526	-0.170983	3.91604	0.147786
78.4	6.71148	-1.13087	6.08366	-5.39899	9.59047	-1.59713		78.4	2.61417	1.65073	6.28432	-0.238616	3.96799	0.43972
78.5	5.82229	0.538313	5.99134	-4.63223	10.6969	-1.60666		78.5	2.65782	1.63015	5.6278	-0.343061	4.00666	0.595831
78.6	4.30354	2.62931	5.99369	-3.02188	10.65	-1.18963		78.6	2.78723	1.50243	4.87516	-0.471035	4.04419	0.619736
78.7	2.51831	4.72309	6.12971	-1.02235	9.52692	-0.323144		78.7	2.96466	1.31704	4.10147	-0.604119	4.07296	0.540854
78.8	0.874365	6.31449	6.22879	0.835602	7.62014	0.864813		78.8	3.1367	1.11908	3.368	-0.713447	4.07126	0.400625
78.9	-0.257843	7.00207	5.95431	2.15494	5.32793	2.08921		78.9	3.24057	0.944963	2.7133	-0.757674	4.00568	0.23746
79	-0.658244	6.62524	4.99499	2.78912	3.05845	2.99892		79	3.21733	0.8197	2.15446	-0.692094	3.83295	0.0792194
79.1	-0.316151	5.28637	3.26489	2.82151	1.15311	3.31483		79.1	3.02974	0.752657	1.69361	-0.488385	3.50888	-0.0580398
79.2	0.590374	3.26961	0.981132	2.45526	-0.172952	2.95699		79.2	2.67383	0.733856	1.32319	-0.154819	3.00615	-0.168442
79.3	1.7909	0.958377	-1.39597	1.85179	-0.887178	2.04518		79.3	2.18064	0.73185	1.02488	0.257139	2.33223	-0.255393
79.4	3.00701	-1.24691	-3.35672	1.07683	-1.13107	0.826499		79.4	1.60887	0.697735	0.765503	0.66518	1.53746	-0.335818
79.5	4.02856	-3.03289	-4.53962	0.199498	-1.08368	-0.413171		79.5	1.03062	0.575235	0.498093	0.98028	0.710494	-0.443758
79.6	4.68161	-4.20593	-4.81325	-0.614421	-0.858857	-1.48178		79.6	0.513588	0.317373	0.177294	1.13116	-0.0421578	-0.62485
79.7	4.77609	-4.67533	-4.24813	-1.11647	-0.561897	-2.28936		79.7	0.103686	-0.0937862	-0.218205	1.08229	-0.624352	-0.923664
79.8	4.14579	-4.4504	-3.06609	-1.08538	-0.364164	-2.81782		79.8	-0.186815	-0.634714	-0.671933	0.839583	-0.977309	-1.36717
79.9	2.74255	-3.65396	-1.58335	-0.47029	-0.468943	-3.08852		79.9	-0.380373	-1.24471	-1.13157	0.443939	-1.09447	-1.95064
80	0.694453	-2.47504	-0.125212	0.545535	-0.990546	-3.15273		80	-0.523301	-1.84322	-1.52496	-0.0429826	-1.0202	-2.63118
80.1	-1.67269	-1.16496	1.01253	1.60429	-1.86619	-3.0753		80.1	-0.669508	-2.35037	-1.77977	-0.554636	-0.835075	-3.33574
80.2	-3.89786	-0.0416496	1.58186	2.30447	-2.81421	-2.97388		80.2	-0.866656	-2.70508	-1.8437	-1.03093	-0.630492	-3.98164
80.3	-5.52668	0.546819	1.44772	2.33483	-3.40845	-3.02461		80.3	-1.14841	-2.87828	-1.70295	-1.4251	-0.482701	-4.49871
80.4	-6.27122	0.339429	0.676125	1.54257	-3.26816	-3.40171		80.4	-1.53124	-2.87827	-1.38958	-1.71005	-0.438981	-4.84575
80.5	-6.09397	-0.675208	-0.494697	0.00477549	-2.27716	-4.21503		80.5	-2.01158	-2.74779	-0.973464	-1.88402	-0.516796	-5.01537
80.6	-5.19637	-2.1937	-1.75906	-1.971	-0.672345	-5.45032		80.6	-2.56187	-2.55303	-0.543106	-1.97361	-0.703869	-5.0316
80.7	-3.94872	-3.74464	-2.81886	-3.93682	1.06671	-6.92022		80.7	-3.13001	-2.36881	-0.18145	-2.02915	-0.953851	-4.93853
80.8	-2.74593	-4.88843	-3.42278	-5.45616	2.41569	-8.25432		80.8	-3.64807	-2.26254	0.0566759	-2.11289	-1.19091	-4.78523
80.9	-1.89514	-5.35185	-3.35064	-6.24286	2.97418	-9.02049		80.9	-4.04571	-2.28485	0.157872	-2.2814	-1.32835	-4.61437
81	-1.56062	-5.0718	-2.4828	-6.24526	2.59073	-8.93517		81	-4.26727	-2.46328	0.150329	-2.56425	-1.29257	-4.45595
81.1	-1.78277	-4.19115	-0.96395	-5.62408	1.38137	-7.96371		81.1	-4.28942	-2.79619	0.0908494	-2.94925	-1.04707	-4.32292
81.2	-2.47967	-3.03286	0.78768	-4.64459	-0.340442	-6.31276		81.2	-4.12901	-3.24866	0.0469177	-3.3814	-0.610174	-4.21024
81.3	-3.48412	-1.98768	2.26077	-3.57197	-2.1817	-4.36526		81.3	-3.83689	-3.75728	0.077259	-3.77649	-0.054569	-4.09537
81.4	-4.57881	-1.36438	3.06796	-2.63933	-3.74215	-2.56538		81.4	-3.48106	-4.24686	0.218781	-4.04711	0.513456	-3.93881
81.5	-5.51266	-1.31875	3.08207	-2.02965	-4.61386	-1.23562		81.5	-3.12477	-4.65145	0.482296	-4.13244	0.986941	-3.69175
81.6	-6.06442	-1.84741	2.46478	-1.89385	-4.49891	-0.48235		81.6	-2.80863	-4.9326	0.852905	-4.01764	1.29143	-3.31147
81.7	-6.06544	-2.8543	1.59512	-2.3192	-3.32707	-0.248087		81.7	-2.54173	-5.08799	1.29301	-3.73629	1.40476	-2.78234
81.8	-5.43923	-4.1982	0.884292	-3.2041	-1.25798	-0.382182		81.8	-2.302	-5.14769	1.74637	-3.35687	1.35779	-2.13288
81.9	-4.27442	-5.70115	0.570719	-4.24051	1.35938	-0.712344		81.9	-2.04611	-5.16329	2.14555	-2.95961	1.21783	-1.43558
82	-2.79968	-7.14511	0.700881	-5.01169	4.01874	-1.10913		82	-1.72389	-5.19161	2.42613	-2.6135	1.06531	-0.790056
82.1	-1.30519	-8.30723	1.19193	-5.17401	6.17712	-1.44893		82.1	-1.29514	-5.27491	2.54214	-2.36201	0.969347	-0.294525
82.2	-0.0448652	-8.99804	1.91118	-4.59579	7.37926	-1.55356		82.2	-0.742764	-5.42608	2.48052	-2.21833	0.970573	-0.0143457
82.3	0.860631	-9.07165	2.72068	-3.42156	7.37691	-1.25022		82.3	-0.0787957	-5.62681	2.26856	-2.16845	1.075	0.0389717
82.4	1.42561	-8.52422	3.4815	-1.98526	6.24309	-0.455415		82.4	0.654809	-5.83682	1.96741	-2.18104	1.25579	-0.0936078
82.5	1.79138	-7.53007	4.05907	-0.673259	4.34226	0.740839		82.5	1.39258	-6.00949	1.65367	-2.21678	1.46401	-0.339755
82.6	2.18032	-6.36675	4.35647	0.207299	2.17571	2.0204		82.6	2.05465	-6.10556	1.39487	-2.23476	1.64227	-0.623553
82.7	2.78939	-5.33694	4.30324	0.50823	0.211443	2.91891		82.7	2.56254	-6.10124	1.23111	-2.19984	1.73513	-0.889298
82.8	3.69505	-4.67254	3.80591	0.259829	-1.21153	3.01016		82.8	2.85869	-5.98866	1.17036	-2.0896	1.69577	-1.11164
82.9	4.80898	-4.44907	2.75985	-0.36938	-1.97183	2.11126		82.9	2.92127	-5.77337	1.19235	-1.90225	1.49256	-1.29118
83	5.90635	-4.55749	1.21316	-1.12939	-2.16086	0.39778		83	2.76972	-5.47389	1.25858	-1.66136	1.11911	-1.44621
83.1	6.70865	-4.77677	-0.535272	-1.79137	-1.96683	-1.65899		83.1	2.45904	-5.12642	1.32312	-1.41033	0.603959	-1.60869
83.2	6.95863	-4.88905	-2.03756	-2.24365	-1.54044	-3.48947		83.2	2.06264	-4.78807	1.3429	-1.19566	0.010496	-1.82056
83.3	6.47767	-4.7827	-2.86881	-2.50139	-0.959153	-4.66685		83.3	1.651	-4.52743	1.28678	-1.05015	-0.579629	-2.12936
83.4	5.18983	-4.48753	-2.80445	-2.62489	-0.296676	-5.07265		83.4	1.27173	-4.40343	1.14063	-0.983741	-1.09291	-2.57688
83.5	3.19485	-4.12475	-1.89971	-2.61044	0.320662	-4.89985		83.5	0.937353	-4.44596	0.907087	-0.984728	-1.48624	-3.18158
83.6	0.760072	-3.78733	-0.461914	-2.36641	0.69018	-4.49211		83.6	0.626058	-4.64474	0.603111	-1.02766	-1.7555	-3.92209
83.7	-1.73577	-3.48511	1.07463	-1.8268	0.564216	-4.16132		83.7	0.294117	-4.95125	0.260646	-1.08229	-1.93091	-4.73367
83.8	-3.88163	-3.21608	2.31792	-1.0789	-0.171571	-4.08451		83.8	-0.103992	-5.2949	-0.071397	-1.12084	-2.06086	-5.52381
83.9	-5.32638	-3.09116	3.00841	-0.328234	-1.37827	-4.3156		83.9	-0.597495	-5.60928	-0.334977	-1.12397	-2.1925	-6.20212
84	-5.87813	-3.3196	3.05681	0.227758	-2.71196	-4.85207		84	-1.18807	-5.8533	-0.483772	-1.0844	-2.35969	-6.7104
84.1	-5.57221	-4.09336	2.52751	0.488521	-3.78903	-5.70499		84.1	-1.84745	-6.0186	-0.506982	-1.00613	-2.58017	-7.03898
84.2	-4.65634	-5.42215	1.57446	0.455629	-4.38353	-6.86704		84.2	-2.52216	-6.12359	-0.441712	-0.899764	-2.86024	-7.22158
84.3	-3.50402	-7.08975	0.386307	0.19052	-4.51093	-8.25953		84.3	-3.13941	-6.19766	-0.366766	-0.779924	-3.19936	-7.31403
84.4	-2.50263	-8.71609	-0.864348	-0.221553	-4.36593	-9.66981		84.4	-3.62018	-6.2664	-0.377418	-0.667956	-3.59184	-7.36906
84.5	-1.94795	-9.88328	-2.01598	-0.669005	-4.19356	-10.7866		84.5	-3.8955	-6.34863	-0.550239	-0.598489	-4.02051	-7.42057
84.6	-1.95888	-10.2911	-2.88489	-1.02473	-4.18092	-11.3211		84.6	-3.92353	-6.45906	-0.91396	-0.616477	-4.44731	-7.48386
84.7	-2.48318	-9.90197	-3.2677	-1.18256	-4.39875	-11.1336		84.7	-3.70156	-6.60701	-1.4425	-0.763956	-4.81609	-7.5631
84.8	-3.33118	-8.92511	-3.06479	-1.11874	-4.80908	-10.2997		84.8	-3.27193	-6.78751	-2.06944	-1.06277	-5.06786	-7.65488
84.9	-4.25085	-7.69909	-2.43214	-0.912925	-5.2886	-9.07524		84.9	-2.71805	-6.9712	-2.71203	-1.50219	-5.16302	-7.74976
85	-4.99225	-6.56758	-1.75921	-0.693229	-5.72025	-7.77113		85	-2.14813	-7.10375	-3.29479	-2.03843	-5.09886	-7.83232
85.1	-5.30347	-5.74677	-1.53038	-0.587616	-6.06184	-6.64435		85.1	-1.67159	-7.12274	-3.76339	-2.60806	-4.91169	-7.88116
85.2	-4.97832	-5.29336	-2.08079	-0.706972	-6.3515	-5.83523		85.2	-1.37392	-6.98222	-4.0907	-3.14899	-4.66371	-7.86764
85.3	-3.92037	-5.18507	-3.39986	-1.18547	-6.59711	-5.36789		85.3	-1.29744	-6.6743	-4.27657	-3.61665	-4.4212	-7.76098
85.4	-2.21218	-5.36255	-5.10864	-2.13259	-6.69135	-5.2373		85.4	-1.43273	-6.23803	-4.34375	-3.99212	-4.23169	-7.53841
85.5	-0.108261	-5.73111	-6.66724	-3.58605	-6.44083	-5.43147		85.5	-1.72518	-5.75032	-4.3341	-4.28416	-4.11005	-7.19453
85.6	1.97747	-6.15971	-7.64959	-5.40812	-5.6585	-5.87589		85.6	-2.09492	-5.30169	-4.30576	-4.52327	-4.03908	-6.74583
85.7	3.53783	-6.4424	-7.86721	-7.24227	-4.32967	-6.46509		85.7	-2.46295	-4.96977	-4.32372	-4.74897	-3.9835	-6.23079
85.8	4.11638	-6.34668	-7.37941	-8.62766	-2.69824	-7.10852		85.8	-2.77193	-4.79936	-4.44079	-4.99303	-3.90598	-5.70255
85.9	3.44483	-5.745	-6.39174	-9.22803	-1.2017	-7.6972		85.9	-2.99578	-4.79464	-4.67593	-5.26848	-3.77522	-5.21665
86	1.5563	-4.70088	-5.17798	-9.00525	-0.295163	-8.02977		86	-3.14228	-4.9263	-4.99981	-5.56943	-3.56673	-4.81853
86.1	-1.20246	-3.48142	-4.0241	-8.17186	-0.243326	-7.8566		86.1	-3.24818	-5.14667	-5.34098	-5.87812	-3.26283	-4.53376
86.2	-4.24783	-2.46666	-3.15815	-7.05203	-0.971861	-7.00297		86.2	-3.36962	-5.40576	-5.6132	-6.17213	-2.85772	-4.3622
86.3	-6.93044	-2.00017	-2.7208	-5.9894	-2.11312	-5.47507		86.3	-3.56889	-5.66439	-5.74982	-6.42669	-2.36404	-4.27439
86.4	-8.76881	-2.27511	-2.78589	-5.24731	-3.19222	-3.5057		86.4	-3.90163	-5.90157	-5.72644	-6.6094	-1.81747	-4.21762
86.5	-9.58767	-3.28262	-3.3701	-4.95566	-3.86421	-1.54408		86.5	-4.40263	-6.11454	-5.56284	-6.67929	-1.27669	-4.13455
86.6	-9.50361	-4.80207	-4.42231	-5.06201	-3.97069	-0.0951109		86.6	-5.06817	-6.31548	-5.31023	-6.59803	-0.813139	-3.98106
86.7	-8.79766	-6.48728	-5.7566	-5.37583	-3.49738	0.489239		86.7	-5.84727	-6.5236	-5.03152	-6.3486	-0.491646	-3.73645
86.8	-7.79405	-7.98501	-7.03629	-5.70375	-2.51746	0.123628		86.8	-6.64777	-6.75517	-4.78514	-5.94904	-0.350598	-3.40553
86.9	-6.77859	-9.03969	-7.88084	-5.95481	-1.18534	-0.994217		86.9	-7.3597	-7.0215	-4.61252	-5.45067	-0.385759	-3.01596
87	-5.9848	-9.58955	-8.02748	-6.18349	0.289769	-2.45134		87	-7.88752	-7.33433	-4.52985	-4.92303	-0.548177	-2.61291
87.1	-5.59981	-9.7592	-7.43122	-6.46023	1.70133	-3.74443		87.1	-8.17741	-7.70883	-4.52918	-4.43308	-0.759904	-2.25448
87.2	-5.76479	-9.76324	-6.26974	-6.69208	2.85083	-4.46652		87.2	-8.23052	-8.15639	-4.58682	-4.02555	-0.940203	-2.00325
87.3	-6.53948	-9.78016	-4.86848	-6.59626	3.53473	-4.46354		87.3	-8.09742	-8.66816	-4.66964	-3.71335	-1.02968	-1.91092
87.4	-7.77644	-9.85841	-3.57284	-5.86081	3.55068	-3.85587		87.4	-7.85872	-9.2054	-4.73621	-3.48023	-1.00429	-1.9976
87.5	-9.12828	-9.88475	-2.6413	-4.38748	2.76714	-2.95004		87.5	-7.60213	-9.7095	-4.7371	-3.29402	-0.880444	-2.2386
87.6	-10.1637	-9.6816	-2.20323	-2.43547	1.19611	-2.07158		87.6	-7.40316	-10.1232	-4.62209	-3.12285	-0.70989	-2.56719
87.7	-10.5466	-9.22862	-2.24342	-0.533007	-0.892898	-1.40714		87.7	-7.31063	-10.4104	-4.35713	-2.94437	-0.564666	-2.89317
87.8	-10.1754	-8.79945	-2.61874	0.79806	-3.00443	-1.00474		87.8	-7.33813	-10.5668	-3.94133	-2.74736	-0.515199	-3.13174
87.9	-9.17582	-8.83323	-3.14672	1.27714	-4.57121	-0.909711		87.9	-7.46165	-10.6155	-3.41423	-2.52647	-0.61127	-3.22962
88	-7.83342	-9.6087	-3.70077	0.938704	-5.1782	-1.20405		88	-7.62672	-10.5918	-2.84843	-2.28084	-0.870858	-3.17876
88.1	-6.50599	-10.9752	-4.19375	0.0599614	-4.71328	-1.93615		88.1	-7.76212	-10.5283	-2.33071	-2.02287	-1.27708	-3.0123
88.2	-5.5299	-12.4156	-4.50176	-0.992594	-3.43255	-3.01762		88.2	-7.79411	-10.4478	-1.93765	-1.78771	-1.78076	-2.78524
88.3	-5.14147	-13.3718	-4.43744	-1.89646	-1.8654	-4.19217		88.3	-7.66386	-10.367	-1.71489	-1.63351	-2.30481	-2.55075
88.4	-5.41524	-13.5196	-3.80153	-2.4658	-0.597968	-5.09671		88.4	-7.34144	-10.3048	-1.66549	-1.62712	-2.75388	-2.34426
88.5	-6.22109	-12.8684	-2.53193	-2.66959	-0.0486423	-5.41809		88.5	-6.83271	-10.2849	-1.75062	-1.8175	-3.03039	-2.18069
88.6	-7.24595	-11.6987	-0.812235	-2.60579	-0.344405	-5.04989		88.6	-6.17969	-10.3241	-1.90366	-2.21007	-3.0587	-2.06284
88.7	-8.08472	-10.4166	0.93329	-2.42827	-1.34344	-4.1153		88.7	-5.45421	-10.4076	-2.05272	-2.75682	-2.80718	-1.98965
88.8	-8.406	-9.35658	2.18735	-2.28451	-2.71166	-2.87982		88.8	-4.74399	-10.4746	-2.1407	-3.36755	-2.30182	-1.95449
88.9	-8.06658	-8.68377	2.53147	-2.30669	-4.05488	-1.63666		88.9	-4.12996	-10.433	-2.13414	-3.93956	-1.62545	-1.93648
89	-7.08334	-8.41167	1.8136	-2.59844	-5.02794	-0.603583		89	-3.66039	-10.1967	-2.02519	-4.39313	-0.902299	-1.89801
89.1	-5.56212	-8.48493	0.21394	-3.23952	-5.35809	0.130467		89.1	-3.33433	-9.72733	-1.83125	-4.69388	-0.267183	-1.7943
89.2	-3.64717	-8.82672	-1.80143	-4.27875	-4.86704	0.560269		89.2	-3.10364	-9.05157	-1.59374	-4.85507	0.173094	-1.59043
89.3	-1.51537	-9.34433	-3.65041	-5.67197	-3.50461	0.709163		89.3	-2.8946	-8.25233	-1.37719	-4.92159	0.371392	-1.28074
89.4	0.554899	-9.89473	-4.84518	-7.20661	-1.3741	0.596253		89.4	-2.63737	-7.43868	-1.25836	-4.94821	0.35039	-0.896903
89.5	2.15776	-10.218	-5.15275	-8.49669	1.27139	0.239591		89.5	-2.291	-6.70997	-1.3062	-4.98137	0.1892	-0.496703
89.6	2.89785	-9.97356	-4.64235	-9.10532	4.01992	-0.311979		89.6	-1.85358	-6.13025	-1.55693	-5.05208	-0.00579012	-0.142367
89.7	2.60508	-8.90003	-3.58918	-8.78548	6.32006	-0.897962		89.7	-1.35354	-5.71927	-1.99703	-5.17528	-0.136503	0.120847
89.8	1.47667	-6.95945	-2.34175	-7.65066	7.58026	-1.28206		89.8	-0.830755	-5.45781	-2.56184	-5.35125	-0.141942	0.275921
89.9	0.0132121	-4.43574	-1.20476	-6.10543	7.36442	-1.25466		89.9	-0.323557	-5.30036	-3.15265	-5.56804	-0.0107948	0.3319
90	-1.21985	-1.88386	-0.399756	-4.6367	5.61932	-0.726373		90	0.134053	-5.18777	-3.66561	-5.80027	0.219113	0.314318
90.1	-1.86157	0.0674552	-0.12017	-3.59666	2.7731	0.168033		90.1	0.506712	-5.0604	-4.02268	-6.00789	0.475017	0.256148
90.2	-1.84807	0.963672	-0.511855	-3.12215	-0.405675	1.10716		90.2	0.753781	-4.87306	-4.191	-6.14237	0.670511	0.190888
90.3	-1.35766	0.689387	-1.62547	-3.16946	-3.08464	1.75351		90.3	0.838461	-4.6079	-4.18603	-6.16276	0.726402	0.146676
90.4	-0.648601	-0.56142	-3.32916	-3.63032	-4.65827	1.90842		90.4	0.747019	-4.28516	-4.06182	-6.05722	0.582787	0.143867
90.5	0.0947515	-2.36992	-5.29437	-4.37897	-4.93377	1.59481		90.5	0.50266	-3.96384	-3.89266	-5.85726	0.208432	0.192247
90.6	0.82069	-4.23884	-7.07024	-5.29815	-4.14735	0.999598		90.6	0.162033	-3.72716	-3.75292	-5.62958	-0.385828	0.285092
90.7	1.53902	-5.73502	-8.23013	-6.2838	-2.79843	0.348059		90.7	-0.205858	-3.66003	-3.69917	-5.44807	-1.13722	0.396521
90.8	2.21724	-6.57089	-8.5064	-7.18751	-1.44965	-0.16842		90.8	-0.542935	-3.82253	-3.75763	-5.36466	-1.93581	0.485631
90.9	2.68804	-6.66141	-7.87161	-7.80823	-0.516683	-0.428619		90.9	-0.816469	-4.23011	-3.91893	-5.39182	-2.65005	0.504586
91	2.6848	-6.15959	-6.51185	-7.95823	-0.181215	-0.400267		91	-1.02119	-4.84521	-4.1419	-5.50339	-3.16731	0.411784
91.1	1.99447	-5.38705	-4.76067	-7.55313	-0.423938	-0.155342		91.1	-1.17407	-5.5831	-4.36575	-5.64883	-3.42976	0.186993
91.2	0.603246	-4.7314	-3.04129	-6.70251	-1.17007	0.19183		91.2	-1.30257	-6.33331	-4.52384	-5.77279	-3.45005	-0.156162
91.3	-1.25625	-4.51122	-1.76662	-5.70595	-2.34411	0.510486		91.3	-1.4349	-6.98565	-4.55697	-5.8296	-3.30167	-0.568048
91.4	-3.18558	-4.87646	-1.21347	-4.91496	-3.78236	0.680403		91.4	-1.59905	-7.4552	-4.42462	-5.7917	-3.08924	-0.976456
91.5	-4.77748	-5.81824	-1.42812	-4.56496	-5.19343	0.612223		91.5	-1.82567	-7.70225	-4.11581	-5.64951	-2.9116	-1.30758
91.6	-5.71709	-7.19813	-2.19859	-4.68745	-6.21159	0.26021		91.6	-2.14506	-7.74168	-3.65684	-5.40433	-2.83355	-1.50508
91.7	-5.86992	-8.81279	-3.14175	-5.09851	-6.52278	-0.404134		91.7	-2.57679	-7.63868	-3.10834	-5.06354	-2.87334	-1.54443
91.8	-5.34188	-10.3892	-3.9107	-5.49326	-6.02026	-1.4096		91.8	-3.11579	-7.48824	-2.54985	-4.64035	-3.00815	-1.43737
91.9	-4.44692	-11.5805	-4.31736	-5.59475	-4.8673	-2.71429		91.9	-3.72193	-7.3836	-2.06016	-4.15787	-3.19129	-1.22317
92	-3.54217	-12.0642	-4.31292	-5.27665	-3.4296	-4.08012		92	-4.3238	-7.38947	-1.69898	-3.65401	-3.36819	-0.952845
92.1	-2.89834	-11.6511	-3.89246	-4.59608	-2.13589	-5.09365		92.1	-4.83491	-7.52544	-1.49213	-3.17953	-3.47977	-0.67462
92.2	-2.69568	-10.3523	-3.04428	-3.73477	-1.32244	-5.34812		92.2	-5.17589	-7.76576	-1.42638	-2.78655	-3.46167	-0.423758
92.3	-3.03192	-8.43869	-1.82052	-2.88091	-1.12736	-4.62949		92.3	-5.29598	-8.05262	-1.45618	-2.51073	-3.25357	-0.217696
92.4	-3.89049	-6.40543	-0.427747	-2.11578	-1.47163	-3.00944		92.4	-5.188	-8.31509	-1.51822	-2.35694	-2.81745	-0.0550771
92.5	-5.1223	-4.81981	0.818207	-1.3941	-2.12608	-0.837367		92.5	-4.89609	-8.48548	-1.55196	-2.2984	-2.15651	0.0803494
92.6	-6.47495	-4.1039	1.62265	-0.613922	-2.80851	1.39135		92.6	-4.50881	-8.50707	-1.51648	-2.28934	-1.32548	0.217794
92.7	-7.61954	-4.38084	1.81288	0.243916	-3.29458	3.24122		92.7	-4.13359	-8.34023	-1.39609	-2.28343	-0.421717	0.398436
92.8	-8.23728	-5.48671	1.37937	1.01244	-3.43116	4.44012		92.8	-3.859	-7.97126	-1.19509	-2.25102	0.441283	0.667384
92.9	-8.08569	-7.04302	0.475299	1.36377	-3.06701	4.92166		92.9	-3.72626	-7.41987	-0.929983	-2.18749	1.1669	1.05497
93	-7.05286	-8.5966	-0.648965	0.974711	-2.03637	4.77513		93	-3.72189	-6.74156	-0.628892	-2.10845	1.70175	1.55574
93.1	-5.22707	-9.75316	-1.7201	-0.226066	-0.244722	4.18347		93.1	-3.78761	-6.02034	-0.331936	-2.0382	2.04522	2.12098
93.2	-2.94187	-10.2801	-2.48279	-1.95056	2.22055	3.37674		93.2	-3.83977	-5.34581	-0.0870329	-2.00018	2.24049	2.67077
93.3	-0.754678	-10.0948	-2.77216	-3.69224	5.02448	2.56246		93.3	-3.79111	-4.78086	0.0618651	-2.01143	2.35361	3.11999
93.4	0.71387	-9.17982	-2.53848	-4.94444	7.60472	1.93243		93.4	-3.57201	-4.33927	0.0892214	-2.08066	2.45235	3.40569
93.5	1.03681	-7.55298	-1.86423	-5.39288	9.34371	1.66131		93.5	-3.14562	-3.98753	-0.000786112	-2.20727	2.59133	3.50427
93.6	0.221202	-5.30793	-0.900299	-5.04379	9.80369	1.85782		93.6	-2.51709	-3.66563	-0.172592	-2.37797	2.80328	3.43246
93.7	-1.28562	-2.69053	0.193908	-4.1966	8.90591	2.50888		93.7	-1.7321	-3.30999	-0.367584	-2.56386	3.09279	3.23507
93.8	-2.82412	-0.119865	1.22609	-3.25249	6.95646	3.41934		93.8	-0.868107	-2.87097	-0.521791	-2.71942	3.4341	2.96676
93.9	-3.81287	1.90836	2.00397	-2.5404	4.51659	4.26096		93.9	-0.0220743	-2.32198	-0.584681	-2.78669	3.77218	2.67823
94	-3.9186	3.02838	2.34283	-2.23458	2.1923	4.71693		94	0.706311	-1.66274	-0.532545	-2.70871	4.03234	2.40879
94.1	-3.06327	3.1988	2.10352	-2.30707	0.451321	4.62732		94.1	1.23597	-0.916043	-0.375805	-2.44754	4.13768	2.1836
94.2	-1.39754	2.68709	1.28326	-2.57104	-0.447433	4.01965		94.2	1.52869	-0.121108	-0.154086	-1.99826	4.03138	2.01459
94.3	0.773609	1.87571	0.0925268	-2.76625	-0.445795	3.06718		94.3	1.60454	0.670061	0.0754304	-1.39446	3.69826	1.89889
94.4	3.06549	1.09154	-1.10783	-2.65801	0.308453	2.02049		94.4	1.53728	1.39429	0.254361	-0.704928	3.17761	1.81514
94.5	5.10746	0.559042	-1.93549	-2.14769	1.49049	1.08447		94.5	1.42645	1.98216	0.33495	-0.0175588	2.55769	1.72211
94.6	6.60226	0.420393	-2.14622	-1.28079	2.73525	0.360387		94.6	1.36202	2.36911	0.285766	0.584243	1.95093	1.56415
94.7	7.32969	0.736301	-1.71809	-0.168757	3.71103	-0.129904		94.7	1.39813	2.51212	0.0966523	1.04256	1.45945	1.28779
94.8	7.15547	1.45388	-0.833776	1.09957	4.17801	-0.396995		94.8	1.54258	2.40776	-0.219779	1.33769	1.14406	0.862057
94.9	6.06235	2.41374	0.181786	2.48924	4.01143	-0.451562		94.9	1.76175	2.09938	-0.627312	1.49041	1.00999	0.291425
95	4.2215	3.41906	0.997059	3.94555	3.21731	-0.310702		95	1.99272	1.66506	-1.06579	1.54976	1.01129	-0.384849
95.1	2.00332	4.27006	1.36329	5.32013	1.94165	-0.0344634		95.1	2.1616	1.19438	-1.46029	1.57225	1.06954	-1.10395
95.2	-0.106575	4.75898	1.17759	6.3292	0.492701	0.237641		95.2	2.20217	0.766417	-1.7401	1.59999	1.09886	-1.79752
95.3	-1.66293	4.68576	0.469708	6.64149	-0.734894	0.276281		95.3	2.07329	0.435214	-1.86022	1.64662	1.02957	-2.41115
95.4	-2.38083	3.88766	-0.642214	6.03403	-1.40901	-0.176546		95.4	1.76786	0.22005	-1.81769	1.70098	0.824054	-2.91615
95.5	-2.21036	2.31129	-1.98884	4.53881	-1.39884	-1.27864		95.5	1.31323	0.101468	-1.65305	1.73953	0.480699	-3.31058
95.6	-1.35713	0.134198	-3.37536	2.47686	-0.84495	-2.97658		95.6	0.767341	0.0267051	-1.43793	1.73714	0.0315056	-3.61569
95.7	-0.192797	-2.21401	-4.58524	0.361726	-0.0869569	-4.98382		95.7	0.212656	-0.0733708	-1.25407	1.66961	-0.467837	-3.87004
95.8	0.863314	-4.18462	-5.35057	-1.29823	0.473487	-6.86934		95.8	-0.252179	-0.259395	-1.16852	1.51188	-0.949526	-4.11985
95.9	1.47331	-5.31447	-5.42326	-2.18862	0.542818	-8.20511		95.9	-0.529561	-0.564596	-1.21597	1.24141	-1.34481	-4.40889
96	1.46342	-5.3997	-4.66422	-2.29469	0.0526123	-8.7235		96	-0.54508	-0.986029	-1.38962	0.846133	-1.59358	-4.76809
96.1	0.874459	-4.53892	-3.1499	-1.86532	-0.869493	-8.41123		96.1	-0.270958	-1.48531	-1.64659	0.334721	-1.65572	-5.20618
96.2	-0.0847669	-3.09876	-1.21243	-1.22355	-2.00324	-7.50055		96.2	0.260111	-1.9954	-1.92325	-0.25702	-1.52041	-5.70459
96.3	-1.12652	-1.59549	0.652656	-0.625523	-3.10178	-6.34479		96.3	0.957459	-2.4315	-2.15223	-0.867979	-1.21169	-6.21775
96.4	-1.95043	-0.534675	1.93896	-0.209234	-3.92526	-5.31691		96.4	1.69369	-2.70624	-2.27626	-1.42472	-0.785226	-6.67984
96.5	-2.27418	-0.247413	2.29187	-0.0484303	-4.31082	-4.72085		96.5	2.34109	-2.75332	-2.25826	-1.86198	-0.313062	-7.01712
96.6	-1.83984	-0.748669	1.63613	-0.192317	-4.17729	-4.69831		96.6	2.80789	-2.55247	-2.09067	-2.14266	0.136235	-7.16434
96.7	-0.493997	-1.76936	0.190304	-0.652457	-3.50245	-5.22438		96.7	3.06105	-2.14312	-1.80058	-2.26836	0.516895	-7.08056
96.8	1.73951	-2.8943	-1.58865	-1.3995	-2.28744	-6.14093		96.8	3.12893	-1.61758	-1.44672	-2.27581	0.816524	-6.76097
96.9	4.55348	-3.72881	-3.19096	-2.3648	-0.563707	-7.20994		96.9	3.08516	-1.09651	-1.10871	-2.22035	1.05307	-6.2406
97	7.36524	-3.98578	-4.23357	-3.4181	1.56541	-8.19668		97	3.01906	-0.699434	-0.870481	-2.15514	1.26216	-5.58669
97.1	9.47409	-3.52601	-4.53483	-4.35227	3.83912	-8.90018		97.1	3.00432	-0.515383	-0.798971	-2.11978	1.48328	-4.88158
97.2	10.3056	-2.35936	-4.09734	-4.92571	5.85109	-9.13422		97.2	3.07983	-0.580318	-0.922818	-2.13684	1.74748	-4.20383
97.3	9.6487	-0.66615	-3.06943	-4.95665	7.18183	-8.71038		97.3	3.24721	-0.868257	-1.21867	-2.21289	2.06809	-3.6094
97.4	7.74265	1.20057	-1.73623	-4.40973	7.55109	-7.48645		97.4	3.47766	-1.30117	-1.61277	-2.34075	2.43808	-3.11663
97.5	5.16703	2.77425	-0.418932	-3.43515	6.94472	-5.44505		97.5	3.71758	-1.77742	-2.00237	-2.50283	2.83118	-2.70403
97.6	2.62731	3.61969	0.592301	-2.31535	5.63651	-2.77221		97.6	3.89457	-2.20345	-2.2896	-2.67112	3.20724	-2.32262
97.7	0.719398	3.45847	1.0819	-1.35182	4.07393	0.122927		97.7	3.92701	-2.51827	-2.41389	-2.80323	3.52134	-1.9163
97.8	-0.24924	2.21143	0.90006	-0.75673	2.68508	2.70521		97.8	3.74456	-2.70397	-2.36962	-2.8435	3.73104	-1.44191
97.9	-0.335411	0.0301264	0.00323844	-0.622406	1.75572	4.48632		97.9	3.3146	-2.78193	-2.2008	-2.73777	3.79998	-0.881143
98	0.157143	-2.69938	-1.45275	-0.915584	1.38969	5.17696		98	2.66163	-2.79828	-1.97875	-2.45767	3.70397	-0.244272
98.1	0.895061	-5.42964	-3.09059	-1.50218	1.52497	4.78842		98.1	1.86802	-2.808	-1.77653	-2.02057	3.43737	0.429837
98.2	1.64342	-7.60691	-4.40782	-2.22193	1.97916	3.6561		98.2	1.05297	-2.86134	-1.65028	-1.49168	3.0188	1.08095
98.3	2.2389	-8.84492	-4.98704	-2.94769	2.5053	2.31592		98.3	0.338369	-2.99473	-1.62861	-0.965776	2.49387	1.6392
98.4	2.51473	-9.01196	-4.69253	-3.51343	2.89057	1.25963		98.4	-0.186359	-3.22512	-1.71215	-0.536492	1.92878	2.03853
98.5	2.29099	-8.24612	-3.70166	-3.64544	3.05236	0.766459		98.5	-0.489323	-3.5433	-1.87678	-0.268994	1.39412	2.22775
98.6	1.45183	-6.88579	-2.43825	-3.04935	3.00119	0.854792		98.6	-0.601126	-3.90739	-2.076	-0.184075	0.946226	2.18182
98.7	0.0559364	-5.31105	-1.36368	-1.62072	2.73737	1.3363		98.7	-0.598254	-4.24499	-2.24282	-0.256278	0.615513	1.91357
98.8	-1.62627	-3.80401	-0.760027	0.409533	2.2069	1.92662		98.8	-0.570585	-4.47111	-2.29709	-0.422904	0.401552	1.47886
98.9	-3.18584	-2.52463	-0.659633	2.50498	1.31895	2.32565		98.9	-0.592838	-4.51564	-2.16382	-0.605413	0.276663	0.968584
99	-4.20716	-1.57281	-0.923188	4.03441	0.0661649	2.3585		99	-0.711701	-4.34779	-1.79941	-0.734514	0.19755	0.48328
99.1	-4.40555	-1.06708	-1.36778	4.53066	-1.37287	2.00383		99.1	-0.944418	-3.98783	-1.21364	-0.767184	0.118686	0.100758
99.2	-3.75334	-1.14247	-1.83912	3.86267	-2.6617	1.34358		99.2	-1.28233	-3.50227	-0.473847	-0.691294	0.00449812	-0.146011
99.3	-2.52308	-1.78935	-2.20642	2.23212	-3.45283	0.444572		99.3	-1.69517	-2.98569	0.313866	-0.525583	-0.164971	-0.26788
99.4	-1.18126	-2.731	-2.30485	0.0918149	-3.54021	-0.657858		99.4	-2.13599	-2.53314	1.03758	-0.317207	-0.396332	-0.304153
99.5	-0.200408	-3.52787	-1.93583	-1.98419	-2.93703	-1.85505		99.5	-2.54712	-2.21344	1.615	-0.136171	-0.68519	-0.303923
99.6	0.134951	-3.81382	-0.919276	-3.45506	-1.88162	-2.90386		99.6	-2.87151	-2.05712	2.01425	-0.063328	-1.0132	-0.309906
99.7	-0.221158	-3.45645	0.812808	-4.01824	-0.733418	-3.49768		99.7	-3.06541	-2.06048	2.25202	-0.170987	-1.34111	-0.349941
99.8	-1.12561	-2.5762	3.10428	-3.69688	0.180037	-3.46175		99.8	-3.1074	-2.19653	2.37696	-0.499455	-1.60809	-0.433917
99.9	-2.31277	-1.48765	5.55034	-2.77732	0.638476	-2.84677		99.9	-3.00497	-2.42621	2.44838	-1.039	-1.74522	-0.557275
100	-3.50555	-0.590295	7.58943	-1.65756	0.56411	-1.87915		100	-2.79797	-2.70288	2.52141	-1.72679	-1.70078	-0.70669
100.1	-4.50358	-0.230114	8.6986	-0.696349	0.00959513	-0.812135		100.1	-2.5515	-2.97268	2.63768	-2.46353	-1.46762	-0.860361
100.2	-5.20292	-0.552806	8.60152	-0.103041	-0.88078	0.149815		100.2	-2.33773	-3.17989	2.8181	-3.14257	-1.09659	-0.981006
100.3	-5.53748	-1.45092	7.37788	0.0282719	-1.90938	0.858697		100.3	-2.2129	-3.27841	3.05714	-3.68383	-0.686111	-1.01557
100.4	-5.45866	-2.65362	5.42355	-0.382389	-2.83882	1.23459		100.4	-2.20054	-3.2442	3.3223	-4.05687	-0.354187	-0.911433
100.5	-4.92261	-3.86103	3.28213	-1.42066	-3.36749	1.24602		100.5	-2.28715	-3.08328	3.55754	-4.28437	-0.200922	-0.642166
100.6	-3.89958	-4.83746	1.46424	-3.07899	-3.21974	0.89805		100.6	-2.42772	-2.83182	3.69053	-4.42472	-0.279119	-0.226871
100.7	-2.46591	-5.47742	0.291036	-5.13787	-2.26502	0.261427		100.7	-2.56164	-2.54832	3.64585	-4.54683	-0.584179	0.271339
100.8	-0.88646	-5.7705	-0.126313	-7.16183	-0.617493	-0.536237		100.8	-2.63415	-2.2964	3.36447	-4.70988	-1.06069	0.7652
100.9	0.436561	-5.72909	0.1374	-8.66176	1.30201	-1.26883		100.9	-2.61149	-2.12328	2.82529	-4.951	-1.62329	1.16895
101	1.11099	-5.31195	0.860846	-9.31157	2.85477	-1.60638		101	-2.48615	-2.0439	2.05812	-5.28104	-2.18231	1.41886
101.1	0.940858	-4.40584	1.75878	-9.1097	3.43789	-1.24541		101.1	-2.27537	-2.03976	1.14062	-5.6882	-2.66625	1.4865
101.2	0.00973768	-2.94615	2.57186	-8.32575	2.70568	-0.0847525		101.2	-2.01723	-2.07074	0.176804	-6.14524	-3.03608	1.3838
101.3	-1.33735	-1.07834	3.07987	-7.32271	0.723872	1.67368		101.3	-1.76208	-2.09095	-0.73326	-6.61226	-3.29098	1.15539
101.4	-2.61094	0.818377	3.07359	-6.40412	-2.06276	3.56232		101.4	-1.56619	-2.06044	-1.52142	-7.03507	-3.46691	0.864066
101.5	-3.40226	2.24336	2.34465	-5.77277	-5.00599	5.00784		101.5	-1.48813	-1.94944	-2.16736	-7.34807	-3.62711	0.573559
101.6	-3.54547	2.79497	0.7669	-5.54916	-7.46221	5.54887		101.6	-1.57901	-1.74009	-2.69602	-7.48799	-3.84793	0.331162
101.7	-3.12025	2.35282	-1.57652	-5.75666	-9.00016	4.98456		101.7	-1.86542	-1.43224	-3.16144	-7.41612	-4.19966	0.15706
101.8	-2.37274	1.11927	-4.34331	-6.30701	-9.49363	3.4363		101.8	-2.33301	-1.04863	-3.62387	-7.13637	-4.7243	0.0403144
101.9	-1.61972	-0.482416	-6.99607	-7.02475	-9.10775	1.29979		101.9	-2.92175	-0.636847	-4.13013	-6.69758	-5.41615	-0.0564729
102	-1.14906	-1.97748	-9.00696	-7.7413	-8.19649	-0.887155		102	-3.54069	-0.267662	-4.70337	-6.17637	-6.21607	-0.184864
102.1	-1.1211	-2.99725	-10.0475	-8.3218	-7.17218	-2.64842		102.1	-4.09493	-0.0229011	-5.34323	-5.65302	-7.02295	-0.394528
102.2	-1.59254	-3.34237	-10.1166	-8.60844	-6.35831	-3.70652		102.2	-4.5145	0.0257046	-6.02981	-5.19209	-7.72219	-0.716743
102.3	-2.57261	-2.95039	-9.51662	-8.39993	-5.9432	-4.04056		102.3	-4.77477	-0.158316	-6.72691	-4.83026	-8.22066	-1.15309
102.4	-4.01084	-1.91861	-8.69628	-7.5165	-6.01896	-3.85933		102.4	-4.8969	-0.55518	-7.38418	-4.57013	-8.473	-1.67055
102.5	-5.75543	-0.536922	-8.03835	-5.94009	-6.59677	-3.49596		102.5	-4.93413	-1.0881	-7.93889	-4.38237	-8.49017	-2.2038
102.6	-7.51245	0.792275	-7.72405	-3.90609	-7.61699	-3.25351		102.6	-4.95392	-1.64512	-8.32344	-4.21699	-8.32511	-2.66617
102.7	-8.89753	1.6883	-7.74551	-1.85208	-8.90669	-3.25177		102.7	-5.01728	-2.11465	-8.47876	-4.01952	-8.04763	-2.97231
102.8	-9.58122	1.8703	-7.98627	-0.24916	-10.1607	-3.42806		102.8	-5.16112	-2.41689	-8.37376	-3.74604	-7.72293	-3.06479
102.9	-9.41232	1.21478	-8.30587	0.571263	-11.0112	-3.64905		102.9	-5.39085	-2.52182	-8.01993	-3.37218	-7.39957	-2.93447
103	-8.47009	-0.252043	-8.59191	0.513103	-11.1634	-3.80397		103	-5.68596	-2.44983	-7.47211	-2.89439	-7.10536	-2.62249
103.1	-7.03539	-2.30997	-8.77712	-0.253046	-10.5366	-3.85552		103.1	-6.00834	-2.25956	-6.81251	-2.33126	-6.85088	-2.20491
103.2	-5.47856	-4.50333	-8.82895	-1.35058	-9.29592	-3.7891		103.2	-6.30584	-2.03199	-6.12613	-1.72601	-6.63424	-1.76646
103.3	-4.17836	-6.26471	-8.66312	-2.35718	-7.75397	-3.51632		103.3	-6.51533	-1.84998	-5.48049	-1.14553	-6.44329	-1.37406
103.4	-3.45666	-7.11654	-8.11382	-2.94517	-6.19413	-2.87566		103.4	-6.57334	-1.77501	-4.91505	-0.669041	-6.25548	-1.06256
103.5	-3.4498	-6.86274	-6.98379	-2.95001	-4.77656	-1.76812		103.5	-6.43546	-1.83186	-4.44097	-0.366455	-6.03884	-0.834686
103.6	-4.06506	-5.6204	-5.21118	-2.37564	-3.58781	-0.272454		103.6	-6.09364	-2.00583	-4.04676	-0.27355	-5.75915	-0.671939
103.7	-5.05447	-3.76138	-2.99175	-1.38571	-2.69931	1.32836		103.7	-5.58372	-2.24969	-3.70544	-0.37769	-5.39283	-0.547786
103.8	-6.13798	-1.77338	-0.73464	-0.199433	-2.17063	2.65517		103.8	-4.98011	-2.49543	-3.38112	-0.621224	-4.94133	-0.435475
103.9	-7.07292	-0.107766	1.09662	0.964894	-2.03228	3.39231		103.9	-4.37588	-2.66658	-3.03483	-0.920596	-4.44064	-0.310187
104	-7.63012	0.918351	2.15174	1.88921	-2.26021	3.41322		104	-3.85656	-2.69259	-2.63204	-1.19373	-3.95605	-0.146108
104.1	-7.57225	1.17549	2.27964	2.35179	-2.77287	2.81148		104.1	-3.47895	-2.52658	-2.15038	-1.38353	-3.56005	0.0839837
104.2	-6.74153	0.737605	1.57408	2.16013	-3.40392	1.79938		104.2	-3.25769	-2.16145	-1.58618	-1.46825	-3.30611	0.400843
104.3	-5.16849	-0.17421	0.335353	1.23789	-3.9341	0.620424		104.3	-3.16205	-1.63593	-0.960865	-1.45832	-3.21444	0.807951
104.4	-3.08673	-1.26913	-1.04391	-0.272706	-4.15198	-0.485071		104.4	-3.12894	-1.02423	-0.324714	-1.38594	-3.27269	1.28498
104.5	-0.912464	-2.2754	-2.1839	-2.01954	-3.93329	-1.31746		104.5	-3.0856	-0.414923	0.251257	-1.2945	-3.4453	1.78967
104.6	0.849058	-2.96282	-2.79246	-3.56882	-3.33566	-1.73976		104.6	-2.97174	0.112387	0.695398	-1.22776	-3.68655	2.2723
104.7	1.80174	-3.16155	-2.70495	-4.57622	-2.65163	-1.67408		104.7	-2.75233	0.50437	0.957326	-1.22015	-3.95158	2.69547
104.8	1.79303	-2.75216	-1.92969	-4.89627	-2.2985	-1.06616		104.8	-2.42124	0.744852	1.02491	-1.28986	-4.20505	3.04731
104.9	0.940932	-1.68115	-0.640642	-4.57731	-2.56392	0.122449		104.9	-2.00097	0.857776	0.929739	-1.43394	-4.42401	3.34209
105	-0.416986	-0.0574148	0.928146	-3.79733	-3.43705	1.87029		105	-1.53917	0.898524	0.73931	-1.62727	-4.59414	3.6095
105.1	-1.83072	1.8172	2.51662	-2.77642	-4.63571	4.04517		105.1	-1.10111	0.937558	0.535552	-1.82527	-4.70824	3.88279
105.2	-2.88695	3.53615	3.83078	-1.71952	-5.76681	6.3413		105.2	-0.758039	1.04335	0.389473	-1.9699	-4.77026	4.18894
105.3	-3.32838	4.73788	4.58032	-0.821243	-6.52223	8.30737		105.3	-0.575805	1.26606	0.341598	-1.99979	-4.80327	4.5406
105.4	-3.1189	5.20288	4.55865	-0.251019	-6.8006	9.53313		105.4	-0.598615	1.62592	0.394677	-1.86483	-4.85224	4.93237
105.5	-2.40798	4.89033	3.71814	-0.0701525	-6.67604	9.84892		105.5	-0.830854	2.10873	0.519709	-1.54289	-4.97418	5.33938
105.6	-1.4443	3.98043	2.24558	-0.220188	-6.34123	9.37371		105.6	-1.22788	2.66812	0.670038	-1.05107	-5.21525	5.71957
105.7	-0.485553	2.83806	0.533803	-0.560094	-5.98255	8.42439		105.7	-1.70239	3.23259	0.796791	-0.445717	-5.58901	6.01771
105.8	0.278313	1.86821	-0.957641	-0.934864	-5.66515	7.35756		105.8	-2.14761	3.71855	0.861153	0.190676	-6.07091	6.17023
105.9	0.705521	1.40118	-1.88981	-1.20584	-5.34353	6.44531		105.9	-2.46735	4.05281	0.838682	0.772334	-6.60861	6.11211
106	0.663704	1.62421	-2.14799	-1.22086	-4.98859	5.8249		106	-2.6028	4.19597	0.721786	1.23315	-7.14003	5.78773
106.1	0.0112524	2.51702	-1.85778	-0.780759	-4.71313	5.49319		106.1	-2.54658	4.15495	0.522585	1.54052	-7.61375	5.16886
106.2	-1.30024	3.84225	-1.28156	0.27477	-4.76579	5.34266		106.2	-2.33972	3.97825	0.272631	1.69691	-8.0009	4.27236
106.3	-3.09901	5.24485	-0.666907	1.90412	-5.40858	5.17929		106.3	-2.05278	3.73858	0.0220187	1.733	-8.29628	3.16517
106.4	-4.94772	6.34818	-0.14936	3.78486	-6.74988	4.78918		106.4	-1.76313	3.50926	-0.166013	1.69465	-8.51269	1.95038
106.5	-6.27364	6.84381	0.22512	5.39465	-8.65238	4.00224		106.5	-1.53574	3.3391	-0.229612	1.63088	-8.67157	0.740558
106.6	-6.6278	6.58009	0.4535	6.24139	-10.7561	2.71522		106.6	-1.4114	3.2364	-0.129985	1.58684	-8.79701	-0.369727
106.7	-5.85255	5.62511	0.546154	6.09086	-12.578	0.882291		106.7	-1.40363	3.1712	0.130009	1.59868	-8.91616	-1.32113
106.8	-4.13334	4.25093	0.529385	5.0575	-13.6699	-1.46927		106.8	-1.49927	3.09005	0.504084	1.68646	-9.05775	-2.09439
106.9	-1.9313	2.83867	0.444357	3.50566	-13.8201	-4.17947		106.9	-1.65947	2.93481	0.917045	1.84616	-9.24162	-2.70487
107	0.18836	1.73402	0.3311	1.83753	-13.1038	-6.93319		107	-1.81903	2.66158	1.29212	2.04514	-9.46437	-3.1895
107.1	1.75903	1.1286	0.298243	0.362497	-11.8221	-9.28902		107.1	-1.8945	2.25529	1.57582	2.2257	-9.69156	-3.5921
107.2	2.51602	0.991892	0.521602	-0.72209	-10.3549	-10.8025		107.2	-1.80426	1.73193	1.74943	2.32038	-9.8623	-3.94875
107.3	2.42134	1.08755	1.16439	-1.30435	-9.04225	-11.1933		107.3	-1.49684	1.13137	1.82608	2.27183	-9.90472	-4.27709
107.4	1.62819	1.09222	2.22746	-1.30873	-8.11495	-10.4505		107.4	-0.974619	0.507348	1.83925	2.05101	-9.75641	-4.57107
107.5	0.410526	0.7599	3.46226	-0.733558	-7.69076	-8.81622		107.5	-0.300371	-0.0818159	1.82878	1.67089	-9.38197	-4.80172
107.6	-0.920434	0.0216134	4.46947	0.286274	-7.75051	-6.70012		107.6	0.418758	-0.581949	1.83117	1.18799	-8.78611	-4.92354
107.7	-2.05975	-1.01501	4.87235	1.4941	-8.11438	-4.55334		107.7	1.0657	-0.949577	1.87363	0.686118	-8.01837	-4.88577
107.8	-2.70112	-2.12786	4.51852	2.60189	-8.49996	-2.74544		107.8	1.55027	-1.15786	1.9706	0.248811	-7.16146	-4.64681
107.9	-2.58335	-3.06471	3.54135	3.34429	-8.62796	-1.50153		107.9	1.83113	-1.20235	2.12289	-0.0641354	-6.30863	-4.18708
108	-1.56483	-3.65219	2.28436	3.51374	-8.31126	-0.883808		108	1.91785	-1.10421	2.31598	-0.229172	-5.53817	-3.5166
108.1	0.278329	-3.86141	1.15381	2.95943	-7.47089	-0.792535		108.1	1.85825	-0.905612	2.51852	-0.259984	-4.89681	-2.67543
108.2	2.60413	-3.7645	0.448865	1.6408	-6.13113	-0.995473		108.2	1.71719	-0.656829	2.68325	-0.199324	-4.39545	-1.728
108.3	4.83443	-3.43569	0.27563	-0.22073	-4.3907	-1.20584		108.3	1.55442	-0.401847	2.75725	-0.104737	-4.01383	-0.752608
108.4	6.37264	-2.87715	0.586747	-2.1184	-2.44845	-1.18874		108.4	1.41128	-0.168141	2.69904	-0.032155	-3.70707	0.172009
108.5	6.86462	-1.99874	1.25125	-3.47433	-0.618273	-0.827095		108.5	1.30929	0.0369298	2.49633	-0.0228683	-3.41531	0.97908
108.6	6.3064	-0.702075	2.09285	-3.92856	0.747344	-0.117196		108.6	1.25293	0.224027	2.17814	-0.0954012	-3.07926	1.6254
108.7	4.96311	0.977691	2.92006	-3.48256	1.39442	0.882251		108.7	1.2303	0.414991	1.81086	-0.246093	-2.65608	2.09878
108.8	3.23313	2.79694	3.58074	-2.44312	1.27567	2.10921		108.8	1.21326	0.633602	1.48023	-0.454545	-2.12982	2.41811
108.9	1.50291	4.36803	3.96477	-1.24589	0.548196	3.49737		108.9	1.15878	0.897948	1.26615	-0.68697	-1.51429	2.62542
109	0.0232684	5.31686	3.96475	-0.273139	-0.519013	4.91304		109	1.01568	1.21786	1.21916	-0.894912	-0.848005	2.7693
109.1	-1.13894	5.42691	3.48551	0.299259	-1.62753	6.13114		109.1	0.738115	1.59391	1.34666	-1.01722	-0.185532	2.88721
109.2	-2.02281	4.7329	2.47264	0.500328	-2.47573	6.90226		109.2	0.305231	2.01623	1.61349	-0.996635	0.413682	2.99639
109.3	-2.65425	3.50782	1.02345	0.444148	-2.79058	7.02009		109.3	-0.265231	2.46273	1.95484	-0.805248	0.898811	3.09748
109.4	-3.01788	2.16564	-0.536981	0.261037	-2.40164	6.43409		109.4	-0.920134	2.8961	2.29812	-0.460781	1.24116	3.18366
109.5	-3.08586	1.11853	-1.72525	0.040134	-1.30581	5.30206		109.5	-1.58778	3.26419	2.58454	-0.0227534	1.44279	3.24733
109.6	-2.87288	0.65169	-2.07937	-0.199394	0.318407	3.92709		109.6	-2.19688	3.5089	2.78246	0.429634	1.53444	3.27857
109.7	-2.49108	0.841693	-1.35499	-0.437487	2.15273	2.6405		109.7	-2.69175	3.58514	2.88642	0.827133	1.56475	3.25668
109.8	-2.15433	1.57713	0.355086	-0.575596	3.85599	1.65341		109.8	-3.04151	3.48348	2.90968	1.13369	1.5854	3.14517
109.9	-2.11451	2.62825	2.61636	-0.438498	5.13091	1.0089		109.9	-3.24216	3.24389	2.8803	1.35331	1.63822	2.9001
110	-2.52459	3.74384	4.81178	0.129282	5.79594	0.650321		110	-3.31245	2.94865	2.84187	1.51836	1.74426	2.49122
110.1	-3.32522	4.71334	6.38963	1.13518	5.79876	0.529744		110.1	-3.28834	2.69526	2.85448	1.66874	1.89679	1.92235
110.2	-4.26873	5.36845	7.08693	2.38161	5.20159	0.637943		110.2	-3.21723	2.56162	2.98505	1.83656	2.06238	1.23806
110.3	-5.04357	5.55547	6.96205	3.51791	4.17518	0.965265		110.3	-3.14877	2.58083	3.28618	2.03853	2.19164	0.511428
110.4	-5.39169	5.13776	6.28464	4.20802	2.95244	1.41319		110.4	-3.12356	2.73515	3.77125	2.27622	2.23659	-0.180158
110.5	-5.17964	4.09301	5.34814	4.31436	1.79084	1.73712		110.5	-3.16319	2.96902	4.39819	2.54231	2.16655	-0.777618
110.6	-4.44289	2.63986	4.36023	3.96556	0.899335	1.60165		110.6	-3.2632	3.21381	5.07436	2.82507	1.97679	-1.25409
110.7	-3.38787	1.24378	3.46527	3.46043	0.378872	0.74684		110.7	-3.38855	3.41137	5.68396	3.11035	1.68612	-1.61436
110.8	-2.33378	0.40796	2.83219	3.10503	0.175169	-0.819748		110.8	-3.47705	3.52788	6.12796	3.38032	1.32901	-1.88483
110.9	-1.61295	0.425259	2.68692	3.05692	0.117315	-2.76847		110.9	-3.45496	3.55504	6.35691	3.61073	0.945874	-2.10144
111	-1.44546	1.23595	3.24313	3.29707	0.0243615	-4.61285		111	-3.26047	3.50263	6.3819	3.77201	0.577666	-2.30217
111.1	-1.8541	2.49206	4.58222	3.6945	-0.204167	-5.9187		111.1	-2.86586	3.38979	6.26247	3.83725	0.264534	-2.52247
111.2	-2.6573	3.74209	6.52108	4.08094	-0.541718	-6.4549		111.2	-2.28887	3.24066	6.08119	3.79431	0.0432566	-2.79268
111.3	-3.54656	4.62748	8.57851	4.32404	-0.872123	-6.22972		111.3	-1.59081	3.08828	5.91623	3.65686	-0.057021	-3.13479
111.4	-4.1912	5.00312	10.1399	4.3695	-1.07325	-5.45951		111.4	-0.86028	2.97624	5.82498	3.46283	-0.0240222	-3.55328
111.5	-4.28536	4.93553	10.7184	4.2741	-1.08537	-4.47125		111.5	-0.188131	2.95086	5.83972	3.2593	0.129883	-4.02299
111.6	-3.61885	4.60904	10.1644	4.15095	-0.940006	-3.58912		111.6	0.358484	3.04333	5.96727	3.08385	0.366126	-4.48491
111.7	-2.14919	4.20545	8.70383	4.04624	-0.71736	-3.03201		111.7	0.754173	3.25466	6.18846	2.9517	0.630742	-4.85941
111.8	-0.0188053	3.82242	6.81457	3.87701	-0.460781	-2.88265		111.8	1.01944	3.55094	6.45729	2.85582	0.872372	-5.07449
111.9	2.43956	3.45011	5.0566	3.49076	-0.121664	-3.10712		111.9	1.20795	3.87399	6.70362	2.77541	1.05619	-5.09486
112	4.76537	3.02029	3.8802	2.78793	0.413477	-3.62837		112	1.38366	4.15878	6.84311	2.68834	1.16859	-4.93975
112.1	6.47531	2.54727	3.48032	1.87128	1.24772	-4.4027		112.1	1.59909	4.35239	6.79775	2.58224	1.21177	-4.67977
112.2	7.23931	2.18849	3.79698	1.0159	2.35182	-5.3771		112.2	1.88258	4.42852	6.52257	2.45847	1.19611	-4.41252
112.3	6.98365	2.20826	4.61079	0.505472	3.51573	-6.38347		112.3	2.23727	4.39048	6.02579	2.32848	1.13784	-4.2285
112.4	5.90458	2.8159	5.6335	0.477762	4.395	-7.10573		112.4	2.64301	4.2654	5.37125	2.20428	1.05947	-4.18349
112.5	4.39294	4.00059	6.59249	0.858616	4.67363	-7.1863		112.5	3.05761	4.09091	4.65966	2.09138	0.990076	-4.2876
112.6	2.89656	5.46186	7.25712	1.42688	4.22503	-6.42481		112.6	3.42404	3.90104	3.99651	1.99279	0.961463	-4.51119
112.7	1.7592	6.7279	7.43059	1.93007	3.14921	-4.9591		112.7	3.68254	3.71827	3.46047	1.91952	0.997607	-4.7992
112.8	1.13297	7.33342	6.9536	2.21436	1.70663	-3.28192		112.8	3.78604	3.55725	3.08148	1.897	1.09989	-5.08716
112.9	1.005	7.03349	5.75008	2.27731	0.192334	-2.03513		112.9	3.71265	3.43352	2.83706	1.96185	1.23761	-5.3142
113	1.27286	5.9218	3.9003	2.2198	-1.13835	-1.68646		113	3.47257	3.36601	2.66768	2.14435	1.34814	-5.43092
113.1	1.8385	4.35637	1.69465	2.15972	-2.06372	-2.33131		113.1	3.106	3.3693	2.5003	2.44698	1.35338	-5.4092
113.2	2.61224	2.80916	-0.408729	2.16275	-2.41772	-3.70595		113.2	2.67578	3.43757	2.26902	2.83474	1.18888	-5.25398
113.3	3.42925	1.64278	-1.93274	2.23162	-2.11969	-5.35902		113.3	2.25616	3.53297	1.92843	3.24427	0.831819	-5.00879
113.4	4.08022	0.977637	-2.56962	2.37028	-1.20378	-6.83301		113.4	1.91821	3.58806	1.45776	3.60526	0.312628	-4.74993
113.5	4.37565	0.71531	-2.29809	2.63129	0.153666	-7.77884		113.5	1.71345	3.52498	0.859915	3.86267	-0.296138	-4.56581
113.6	4.19903	0.712666	-1.38627	3.10798	1.61713	-8.00254		113.6	1.6616	3.28315	0.160557	3.99293	-0.903354	-4.5275
113.7	3.51786	0.916955	-0.27494	3.89035	2.75481	-7.48797		113.7	1.74779	2.84627	-0.59076	4.00715	-1.42514	-4.6591
113.8	2.39379	1.3996	0.600824	4.97387	3.12671	-6.38699		113.8	1.92991	2.25371	-1.32203	3.94284	-1.80356	-4.92212
113.9	1.00776	2.24434	0.951515	6.16057	2.44087	-5.00787		113.9	2.15299	1.58932	-1.94887	3.85136	-2.01705	-5.22755
114	-0.330185	3.36887	0.679027	7.09735	0.719135	-3.74469		114	2.36348	0.953874	-2.39556	3.78491	-2.0837	-5.46964
114.1	-1.22891	4.43773	-0.156473	7.43974	-1.67497	-2.93756		114.1	2.51854	0.431862	-2.61945	3.78606	-2.05641	-5.56255
114.2	-1.35214	4.93721	-1.409	6.99541	-4.15262	-2.78563		114.2	2.59292	0.0690372	-2.62744	3.87812	-2.00998	-5.46357
114.3	-0.584375	4.3895	-2.90617	5.80294	-6.12399	-3.29482		114.3	2.57964	-0.132155	-2.47461	4.0583	-2.02157	-5.18101
114.4	0.877659	2.61674	-4.4585	4.14446	-7.17346	-4.30782		114.4	2.48653	-0.201865	-2.24414	4.29823	-2.14856	-4.76699
114.5	2.59825	-0.0934987	-5.81879	2.45615	-7.16371	-5.51914		114.5	2.33209	-0.188959	-2.01748	4.55039	-2.41024	-4.29992
114.6	4.10108	-3.04018	-6.68154	1.18403	-6.24084	-6.50632		114.6	2.14502	-0.151437	-1.8476	4.75656	-2.78167	-3.86227
114.7	5.06508	-5.37281	-6.75591	0.664596	-4.7676	-6.87882		114.7	1.96541	-0.149609	-1.74525	4.85838	-3.19678	-3.52155
114.8	5.41685	-6.44614	-5.89918	1.03006	-3.19679	-6.44681		114.8	1.83889	-0.235541	-1.68017	4.81408	-3.56088	-3.31699
114.9	5.2483	-6.06506	-4.21481	2.18238	-1.95381	-5.2854		114.9	1.80085	-0.437034	-1.59733	4.61429	-3.77591	-3.25306
115	4.69371	-4.52524	-2.06848	3.79662	-1.33045	-3.6764		115	1.85534	-0.743668	-1.43951	4.28918	-3.76884	-3.30476
115.1	3.85451	-2.44262	0.0284525	5.43331	-1.40072	-2.02956		115.1	1.96447	-1.09978	-1.16601	3.90455	-3.51608	-3.42848
115.2	2.79281	-0.469772	1.6199	6.71013	-2.00522	-0.740409		115.2	2.05807	-1.41076	-0.759529	3.54445	-3.05184	-3.57318
115.3	1.57345	0.932072	2.46685	7.39474	-2.83142	-0.0623494		115.3	2.06131	-1.56598	-0.2243	3.28349	-2.45741	-3.68766
115.4	0.3377	1.55483	2.61312	7.39513	-3.55944	-0.0479422		115.4	1.92486	-1.47451	0.416509	3.16318	-1.8365	-3.72985
115.5	-0.659527	1.43068	2.34082	6.70491	-3.93017	-0.594845		115.5	1.64407	-1.10085	1.12142	3.18125	-1.28664	-3.68034
115.6	-1.14311	0.783489	2.05774	5.40735	-3.74884	-1.53025		115.6	1.25889	-0.485088	1.83291	3.2974	-0.87504	-3.55271
115.7	-0.97683	-0.0565173	2.0873	3.70104	-2.93648	-2.65802		115.7	0.835807	0.266327	2.48318	3.45001	-0.625791	-3.3931
115.8	-0.302689	-0.775044	2.52663	1.91275	-1.55463	-3.8164		115.8	0.44456	1.01795	3.00609	3.57578	-0.51935	-3.26675
115.9	0.50315	-1.11677	3.24043	0.45673	0.144253	-4.88885		115.9	0.139606	1.65019	3.3522	3.62859	-0.504377	-3.23979
116	1.00688	-0.897116	4.004	-0.318762	1.76809	-5.75477		116	-0.0482088	2.09288	3.50174	3.59013	-0.517607	-3.35924
116.1	0.932583	-0.0219492	4.64037	-0.291777	2.93189	-6.25401		116.1	-0.111358	2.33714	3.46924	3.46654	-0.504411	-3.64015
116.2	0.278657	1.46156	5.07498	0.410826	3.39167	-6.23627		116.2	-0.0612876	2.42472	3.29825	3.27492	-0.433529	-4.06386
116.3	-0.672264	3.31205	5.30193	1.49114	3.10675	-5.66461		116.3	0.0743143	2.42855	3.04666	3.03528	-0.301135	-4.5869
116.4	-1.48305	5.09506	5.33939	2.63928	2.22965	-4.70926		116.4	0.252095	2.43014	2.76705	2.77239	-0.12765	-5.15457
116.5	-1.77555	6.32791	5.15543	3.6243	1.04044	-3.73344		116.5	0.415261	2.4968	2.48933	2.52287	0.0477607	-5.71401
116.6	-1.4029	6.71255	4.67465	4.32056	-0.144303	-3.13741		116.6	0.500623	2.66316	2.21719	2.33576	0.173954	-6.22528
116.7	-0.490516	6.22289	3.81541	4.6943	-1.07591	-3.21803		116.7	0.456779	2.92688	1.93605	2.26247	0.195129	-6.66652
116.8	0.661659	5.083	2.57063	4.77954	-1.62564	-4.06028		116.8	0.264483	3.2566	1.62621	2.33659	0.0635911	-7.03336
116.9	1.71927	3.68266	1.06734	4.60915	-1.78088	-5.51586		116.9	-0.0517881	3.60402	1.26837	2.55661	-0.246677	-7.33466
117	2.42465	2.42097	-0.439884	4.13715	-1.62643	-7.26532		117	-0.430511	3.91374	0.844987	2.88393	-0.730393	-7.58911
117.1	2.64293	1.62	-1.66388	3.32119	-1.30875	-8.93974		117.1	-0.795401	4.13134	0.342979	3.25262	-1.3481	-7.82424
117.2	2.36275	1.45759	-2.41252	2.23591	-0.980918	-10.2451		117.2	-1.08378	4.21264	-0.241128	3.58745	-2.03328	-8.07554
117.3	1.63071	1.91667	-2.66358	1.16542	-0.766869	-11.0409		117.3	-1.26786	4.13592	-0.897795	3.82079	-2.70999	-8.38006
117.4	0.474318	2.77164	-2.53912	0.520152	-0.791187	-11.3495		117.4	-1.35796	3.91357	-1.60241	3.90656	-3.31348	-8.76257
117.5	-1.04803	3.70829	-2.25273	0.666856	-1.19465	-11.3176		117.5	-1.39009	3.59307	-2.31548	3.83063	-3.80618	-9.22386
117.6	-2.76588	4.48848	-2.02679	1.71672	-2.0919	-11.1251		117.6	-1.40658	3.2452	-2.98459	3.61394	-4.18283	-9.73638
117.7	-4.36973	5.00899	-2.07936	3.42164	-3.50648	-10.8769		117.7	-1.44094	2.94029	-3.55065	3.30537	-4.46444	-10.2513
117.8	-5.5057	5.24319	-2.55711	5.27271	-5.29128	-10.5797		117.8	-1.51169	2.72335	-3.95992	2.96756	-4.68884	-10.7145
117.9	-5.92448	5.16083	-3.45916	6.67849	-7.10943	-10.2335		117.9	-1.62449	2.60307	-4.18145	2.66454	-4.8991	-11.0828
118	-5.57474	4.6942	-4.62788	7.18323	-8.5412	-9.93658		118	-1.7757	2.55528	-4.22308	2.44836	-5.13195	-11.3346
118.1	-4.6123	3.79076	-5.82395	6.60604	-9.27444	-9.88617		118.1	-1.95735	2.53725	-4.13372	2.34531	-5.41037	-11.4689
118.2	-3.3074	2.54799	-6.82301	5.08248	-9.21881	-10.2361		118.2	-2.15943	2.50605	-3.98926	2.34562	-5.74136	-11.4982
118.3	-1.94909	1.26404	-7.4475	3.02967	-8.52035	-10.9794		118.3	-2.36608	2.43463	-3.8694	2.40394	-6.11306	-11.4393
118.4	-0.770784	0.309105	-7.55953	1.01067	-7.47887	-11.9307		118.4	-2.55264	2.31574	-3.832	2.45051	-6.49227	-11.3097
118.5	0.0776049	-0.100528	-7.05232	-0.466137	-6.41301	-12.8146		118.5	-2.68785	2.15469	-3.89698	2.40951	-6.82699	-11.1286
118.6	0.516461	-0.00531473	-5.89028	-1.13372	-5.59569	-13.3889		118.6	-2.74404	1.95924	-4.04441	2.2184	-7.05226	-10.9236
118.7	0.507043	0.376221	-4.20587	-1.0141	-5.20091	-13.5279		118.7	-2.71006	1.73593	-4.22696	1.84164	-7.1019	-10.7307
118.8	0.072331	0.807542	-2.37172	-0.353913	-5.26706	-13.2194		118.8	-2.59992	1.49446	-4.39251	1.28099	-6.92792	-10.5839
118.9	-0.725309	1.15117	-0.893347	0.484017	-5.71412	-12.5287		118.9	-2.45154	1.25832	-4.50489	0.578175	-6.52309	-10.4977
119	-1.8046	1.38621	-0.207826	1.17069	-6.39366	-11.538		119	-2.31568	1.07068	-4.55199	-0.191929	-5.93038	-10.454
119.1	-3.0387	1.55748	-0.501337	1.51158	-7.11012	-10.3498		119.1	-2.24197	0.9821	-4.54366	-0.940614	-5.23455	-10.4047
119.2	-4.21954	1.68724	-1.617	1.45855	-7.64125	-9.11356		119.2	-2.26605	1.02291	-4.50442	-1.59391	-4.53864	-10.2888
119.3	-5.06446	1.75055	-3.13153	1.01971	-7.78221	-8.04607		119.3	-2.40157	1.1795	-4.46655	-2.11536	-3.93349	-10.0545
119.4	-5.32498	1.68647	-4.58564	0.172762	-7.33601	-7.39165		119.4	-2.63801	1.39559	-4.46908	-2.51298	-3.47365	-9.67811
119.5	-4.92816	1.44685	-5.66042	-1.13207	-6.13508	-7.30101		119.5	-2.94491	1.59619	-4.55601	-2.8299	-3.16442	-9.1695
119.6	-4.05202	1.05581	-6.27357	-2.85264	-4.1519	-7.73831		119.6	-3.27995	1.71652	-4.765	-3.12522	-2.96495	-8.56666
119.7	-3.05232	0.679917	-6.53834	-4.76461	-1.65904	-8.47093		119.7	-3.60058	1.72044	-5.10881	-3.45287	-2.80591	-7.92396
119.8	-2.30257	0.600797	-6.62465	-6.48573	0.80173	-9.14287		119.8	-3.87303	1.60267	-5.56024	-3.84377	-2.61419	-7.2973
119.9	-2.05445	1.04214	-6.68127	-7.64517	2.61019	-9.39866		119.9	-4.07664	1.38116	-6.05218	-4.2988	-2.33534	-6.73388
120	-2.35848	1.95788	-6.78046	-8.0764	3.31012	-9.00847		120	-4.20605	1.08662	-6.49561	-4.79355	-1.94727	-6.26439
120.1	-3.07451	2.97111	-6.91571	-7.85394	2.80863	-7.94862		120.1	-4.27375	0.754776	-6.80838	-5.29043	-1.46245	-5.89713
120.2	-3.94187	3.57294	-7.09539	-7.2256	1.40433	-6.41519		120.2	-4.31286	0.421991	-6.94155	-5.74588	-0.918732	-5.6139
120.3	-4.70088	3.40485	-7.36803	-6.52147	-0.338789	-4.74247		120.3	-4.37404	0.123068	-6.88959	-6.10925	-0.368252	-5.37165
120.4	-5.18868	2.42191	-7.75867	-6.0345	-1.80996	-3.2795		120.4	-4.51274	-0.112836	-6.68422	-6.32248	0.129769	-5.11433
120.5	-5.37839	0.874174	-8.21658	-5.92393	-2.56339	-2.29361		120.5	-4.77023	-0.267491	-6.37568	-6.331	0.514616	-4.78952
120.6	-5.35691	-0.850946	-8.56773	-6.1613	-2.45485	-1.87543		120.6	-5.15765	-0.339936	-6.01188	-6.10393	0.735509	-4.36513
120.7	-5.26592	-2.37943	-8.57067	-6.56484	-1.65327	-1.95978		120.7	-5.64724	-0.353641	-5.62533	-5.65306	0.765571	-3.83904
120.8	-5.23875	-3.44966	-8.03966	-6.89907	-0.512775	-2.36858		120.8	-6.17714	-0.358321	-5.23146	-5.03575	0.613983	-3.23868
120.9	-5.37045	-3.95418	-6.93407	-6.98844	0.600602	-2.87013		120.9	-6.66993	-0.415587	-4.83629	-4.33816	0.328469	-2.61359
121	-5.72936	-3.90678	-5.39547	-6.72306	1.46101	-3.23104		121	-7.05741	-0.573522	-4.44451	-3.65075	-0.0173136	-2.02632
121.1	-6.36492	-3.39522	-3.70239	-6.00444	2.02214	-3.27338		121.1	-7.30196	-0.843711	-4.06035	-3.04401	-0.347139	-1.54034
121.2	-7.28603	-2.56352	-2.16901	-4.75702	2.3313	-2.92659		121.2	-7.4044	-1.19081	-3.68264	-2.55054	-0.606318	-1.20741
121.3	-8.42944	-1.57334	-1.02848	-2.99754	2.39049	-2.21667		121.3	-7.39751	-1.5427	-3.30153	-2.16054	-0.775568	-1.0555
121.4	-9.63844	-0.551638	-0.353684	-0.904264	2.09614	-1.25626		121.4	-7.32926	-1.8171	-2.899	-1.83106	-0.869736	-1.08009
121.5	-10.6256	0.367809	-0.0533616	1.17902	1.31279	-0.199317		121.5	-7.24481	-1.94999	-2.45736	-1.50615	-0.925265	-1.24489
121.6	-11.0628	0.962571	0.014546	2.84914	0.0331956	0.807462		121.6	-7.17501	-1.91671	-1.97023	-1.13829	-0.984272	-1.49152
121.7	-10.736	0.984356	-0.0625356	3.78251	-1.54363	1.618		121.7	-7.13371	-1.73895	-1.45368	-0.702647	-1.08304	-1.75708
121.8	-9.6616	0.286222	-0.255535	3.83211	-3.06967	2.03499		121.8	-7.11954	-1.47492	-0.949137	-0.200622	-1.24642	-1.99516
121.9	-8.0993	-1.02028	-0.564627	3.08889	-4.20269	1.84657		121.9	-7.11868	-1.19873	-0.51307	0.343485	-1.48768	-2.19346
122	-6.44225	-2.49582	-0.94692	1.86756	-4.74484	0.917241		122	-7.10864	-0.977516	-0.196557	0.888648	-1.80918	-2.37823
122.1	-5.07153	-3.56018	-1.2798	0.595544	-4.68721	-0.697011		122.1	-7.06097	-0.853584	-0.02507	1.38414	-2.20188	-2.60263
122.2	-4.21812	-3.79059	-1.37367	-0.322819	-4.16425	-2.71153		122.2	-6.94191	-0.838542	0.0099913	1.77656	-2.64217	-2.9264
122.3	-3.92132	-3.11011	-1.0598	-0.637903	-3.39883	-4.67714		122.3	-6.71743	-0.92005	-0.0549366	2.01818	-3.0882	-3.3938
122.4	-4.07937	-1.81367	-0.289526	-0.311187	-2.65639	-6.15243		122.4	-6.36678	-1.07061	-0.170387	2.08146	-3.48087	-4.01852
122.5	-4.53661	-0.427861	0.741785	0.506907	-2.1919	-6.88307		122.5	-5.89731	-1.2501	-0.28758	1.97285	-3.75495	-4.78028
122.6	-5.12959	0.534488	1.64314	1.54598	-2.17683	-6.91751		122.6	-5.35219	-1.40741	-0.366686	1.73648	-3.85938	-5.62925
122.7	-5.71475	0.788377	2.01767	2.52677	-2.6403	-6.60213		122.7	-4.80222	-1.48462	-0.380108	1.4441	-3.77688	-6.49302
122.8	-6.19423	0.365408	1.67834	3.26332	-3.44336	-6.41449		122.8	-4.32292	-1.42803	-0.312549	1.17456	-3.53192	-7.28684
122.9	-6.47559	-0.45667	0.746272	3.66627	-4.34475	-6.7415		122.9	-3.96925	-1.20515	-0.163017	0.990671	-3.18469	-7.92567
123	-6.40551	-1.31763	-0.432443	3.67365	-5.09443	-7.72069		123	-3.75795	-0.820728	0.0510079	0.923009	-2.81271	-8.3391
123.1	-5.82217	-1.93728	-1.45746	3.2033	-5.48634	-9.20208		123.1	-3.66718	-0.322703	0.291207	0.964997	-2.48839	-8.48544
123.2	-4.66458	-2.19173	-2.01602	2.25473	-5.36256	-10.8196		123.2	-3.64968	0.20972	0.502185	1.07901	-2.25916	-8.366
123.3	-3.08169	-2.08879	-1.97774	1.00278	-4.62621	-12.1425		123.3	-3.65114	0.691425	0.623359	1.21272	-2.13684	-8.03071
123.4	-1.46909	-1.68993	-1.40733	-0.235756	-3.31894	-12.8144		123.4	-3.6262	1.05759	0.608426	1.31812	-2.09876	-7.56824
123.5	-0.31198	-1.02635	-0.483708	-1.13826	-1.66712	-12.6491		123.5	-3.54825	1.28094	0.444941	1.36597	-2.0999	-7.0787
123.6	0.0487146	-0.0581605	0.583877	-1.49337	-0.0384345	-11.6485		123.6	-3.41228	1.37537	0.164178	1.34914	-2.09065	-6.64013
123.7	-0.42984	1.29317	1.59511	-1.25853	1.15809	-9.94277		123.7	-3.22948	1.38372	-0.167762	1.27731	-2.03257	-6.28547
123.8	-1.47936	2.97494	2.35863	-0.554723	1.63647	-7.72538		123.8	-3.02166	1.35802	-0.47565	1.16994	-1.90605	-5.99873
123.9	-2.67517	4.67583	2.70971	0.390985	1.34919	-5.19936		123.9	-2.82095	1.34406	-0.701174	1.05517	-1.71172	-5.73147
124	-3.62372	5.94108	2.52682	1.30028	0.498008	-2.64653		124	-2.67037	1.37228	-0.817179	0.972191	-1.46968	-5.42592
124.1	-4.10427	6.37532	1.77044	1.96188	-0.576812	-0.452537		124.1	-2.62059	1.45407	-0.83034	0.966268	-1.21962	-5.03711
124.2	-4.11253	5.79694	0.487933	2.2987	-1.54463	0.978946		124.2	-2.7173	1.58176	-0.772329	1.07509	-1.01932	-4.54729
124.3	-3.80445	4.33138	-1.13611	2.35945	-2.19614	1.40459		124.3	-2.98083	1.73036	-0.683679	1.31575	-0.93206	-3.97084
124.4	-3.40328	2.39368	-2.7553	2.24066	-2.48313	0.853575		124.4	-3.38975	1.86106	-0.599669	1.67886	-1.00731	-3.34756
124.5	-3.08669	0.507489	-3.96465	2.0422	-2.45602	-0.385215		124.5	-3.88199	1.92576	-0.544026	2.12946	-1.26144	-2.73
124.6	-2.94261	-0.893708	-4.48783	1.84102	-2.19385	-1.867		124.6	-4.37293	1.87296	-0.527638	2.61602	-1.66707	-2.17443
124.7	-2.99341	-1.5549	-4.26635	1.72262	-1.79087	-3.17728		124.7	-4.7834	1.6585	-0.548492	3.08587	-2.15852	-1.7381
124.8	-3.26241	-1.45755	-3.42954	1.79259	-1.37154	-4.00776		124.8	-5.06227	1.26172	-0.592494	3.49929	-2.65002	-1.4736
124.9	-3.81823	-0.801171	-2.23975	2.15404	-1.11163	-4.20972		124.9	-5.19687	0.69761	-0.634848	3.83897	-3.06094	-1.41642
125	-4.72576	0.0819137	-0.991552	2.85267	-1.221	-3.8156		125	-5.21046	0.0194825	-0.641871	4.1086	-3.33604	-1.5692
125.1	-5.9492	0.836278	0.0997225	3.85548	-1.8356	-3.01459		125.1	-5.15052	-0.686453	-0.574838	4.32377	-3.45407	-1.89099
125.2	-7.26357	1.19555	0.944463	5.03472	-2.94638	-2.05335		125.2	-5.07253	-1.31975	-0.39929	4.50061	-3.42526	-2.30248
125.3	-8.31932	1.04172	1.5298	6.16676	-4.35858	-1.14996		125.3	-5.02478	-1.7949	-0.0983586	4.64914	-3.27917	-2.70763
125.4	-8.77587	0.39556	1.8737	7.01298	-5.7377	-0.498153		125.4	-5.04033	-2.0673	0.319382	4.77262	-3.05312	-3.02125
125.5	-8.45735	-0.670876	2.00411	7.43277	-6.71814	-0.307749		125.5	-5.13284	-2.14393	0.819891	4.87096	-2.78481	-3.19154
125.6	-7.41587	-2.06946	1.96168	7.41907	-7.00631	-0.702934		125.6	-5.29436	-2.07771	1.34832	4.94214	-2.50612	-3.2089
125.7	-5.91197	-3.64879	1.8068	7.07495	-6.48772	-1.67439		125.7	-5.49542	-1.94597	1.83725	4.98053	-2.23807	-3.10456
125.8	-4.33533	-5.15285	1.65105	6.54552	-5.25339	-3.04983		125.8	-5.68769	-1.82308	2.22272	4.97395	-1.98877	-2.93703
125.9	-3.09356	-6.20396	1.62749	5.95653	-3.55126	-4.49143		125.9	-5.81151	-1.76006	2.46235	4.90254	-1.75216	-2.77067
126	-2.47863	-6.43464	1.84822	5.36578	-1.70625	-5.59072		126	-5.80838	-1.77527	2.54897	4.7406	-1.50917	-2.65386
126.1	-2.59145	-5.68391	2.36053	4.76571	0.000251939	-6.03406		126.1	-5.63595	-1.85665	2.51222	4.46639	-1.22732	-2.60691
126.2	-3.35106	-4.12338	3.13694	4.14142	1.38685	-5.71676		126.2	-5.27912	-1.9695	2.40812	4.07765	-0.864588	-2.62399
126.3	-4.5154	-2.19629	4.02081	3.51277	2.36744	-4.76194		126.3	-4.75804	-2.06622	2.3009	3.60055	-0.382133	-2.68126
126.4	-5.73921	-0.429155	4.71694	2.93264	2.94697	-3.47232		126.4	-4.12901	-2.09147	2.24537	3.08475	0.235993	-2.7429
126.5	-6.68042	0.781977	4.88234	2.44514	3.18525	-2.234		126.5	-3.4758	-1.98892	2.27522	2.59002	0.964907	-2.76924
126.6	-7.08685	1.28797	4.31323	2.04231	3.1264	-1.36167		126.6	-2.88756	-1.71334	2.40032	2.17156	1.7369	-2.72081
126.7	-6.8306	1.15323	3.08215	1.6387	2.80139	-0.987547		126.7	-2.43061	-1.24435	2.60911	1.86846	2.45794	-2.56073
126.8	-5.89604	0.57776	1.57216	1.10244	2.29532	-1.02888		126.8	-2.12779	-0.601281	2.87474	1.69649	3.03873	-2.2625
126.9	-4.33228	-0.187898	0.319839	0.373211	1.84509	-1.25508		126.9	-1.95334	0.151401	3.16171	1.64734	3.42351	-1.82488
127	-2.25324	-0.876822	-0.239978	-0.441855	1.80781	-1.4403		127	-1.84413	0.916313	3.42969	1.69546	3.60267	-1.28244
127.1	0.0826264	-1.2487	0.0509428	-1.09768	2.46403	-1.47176		127.1	-1.72026	1.59273	3.63527	1.80627	3.60735	-0.702627
127.2	2.23602	-1.10007	1.06009	-1.33588	3.79	-1.35574		127.2	-1.50892	2.10675	3.73859	1.94197	3.49125	-0.167827
127.3	3.6888	-0.326207	2.46925	-0.991284	5.38523	-1.15063		127.3	-1.16148	2.42931	3.71628	2.06815	3.30952	0.250247
127.4	4.08811	1.03612	3.93346	-0.0388836	6.63619	-0.851058		127.4	-0.661939	2.57665	3.5768	2.1611	3.10532	0.513984
127.5	3.4328	2.81997	5.20049	1.39267	7.00428	-0.328448		127.5	-0.0287479	2.59752	3.3643	2.21328	2.90647	0.628292
127.6	2.0543	4.72825	6.14314	3.03306	6.32216	0.578496		127.6	0.688215	2.55709	3.145	2.23608	2.73035	0.630377
127.7	0.487112	6.36096	6.72679	4.5302	4.83502	1.84883		127.7	1.41607	2.52062	2.97988	2.25862	2.5871	0.568458
127.8	-0.734963	7.3196	6.91613	5.58384	3.04605	3.1874		127.8	2.06904	2.54111	2.89897	2.3203	2.47599	0.481315
127.9	-1.24516	7.37565	6.63177	6.02514	1.46625	4.13999		127.9	2.5613	2.65239	2.89234	2.45803	2.37717	0.391282
128	-0.922736	6.5421	5.77723	5.81972	0.393748	4.32966		128	2.82684	2.8666	2.91964	2.69342	2.2488	0.30754
128.1	0.16735	5.05431	4.33776	5.07768	-0.14245	3.63495		128.1	2.84391	3.17448	2.92815	3.02513	2.04065	0.232104
128.2	1.81177	3.28678	2.51118	4.02535	-0.286006	2.24952		128.2	2.65128	3.54819	2.87006	3.42803	1.71672	0.163735
128.3	3.6774	1.64277	0.700707	2.92929	-0.254068	0.581557		128.3	2.33916	3.94228	2.71218	3.8558	1.27403	0.0941608
128.4	5.35777	0.466037	-0.645945	2.02631	-0.192629	-0.952091		128.4	2.01847	4.29638	2.43794	4.24873	0.747461	-0.000200738
128.5	6.47747	-0.0423616	-1.23487	1.48565	-0.140049	-2.08151		128.5	1.7838	4.54628	2.04787	4.54847	0.195863	-0.161453
128.6	6.76819	0.160408	-1.05566	1.42177	-0.0436926	-2.73652		128.6	1.68316	4.64238	1.55897	4.71597	-0.31853	-0.439551
128.7	6.11516	1.01502	-0.352698	1.89946	0.127905	-2.97085		128.7	1.70786	4.56781	1.00457	4.7442	-0.749793	-0.871369
128.8	4.5968	2.39279	0.515035	2.90409	0.281718	-2.89537		128.8	1.80459	4.34501	0.435084	4.66271	-1.07977	-1.4578
128.9	2.52626	4.13393	1.20475	4.30305	0.251355	-2.63817		128.9	1.8996	4.02844	-0.0830579	4.53163	-1.31769	-2.1546
129	0.41411	6.02696	1.48175	5.85813	-0.12153	-2.3129		129	1.91925	3.68645	-0.476282	4.42047	-1.49107	-2.88281
129.1	-1.21795	7.73554	1.24952	7.23314	-0.889467	-2.03382		129.1	1.80618	3.38049	-0.683979	4.38229	-1.63686	-3.55615
129.2	-2.01886	8.83977	0.538468	8.07245	-1.94748	-1.93259		129.2	1.53059	3.14927	-0.680746	4.43541	-1.79103	-4.11104
129.3	-1.93518	8.97655	-0.488087	8.12868	-3.055	-2.16279		129.3	1.09588	3.00242	-0.488608	4.56251	-1.98057	-4.52466
129.4	-1.22366	7.99459	-1.58448	7.37773	-3.90965	-2.87884		129.4	0.536897	2.92312	-0.17137	4.72492	-2.21802	-4.81429
129.5	-0.315096	6.05197	-2.50866	6.06382	-4.28543	-4.15351		129.5	-0.0851619	2.87621	0.185887	4.88022	-2.50107	-5.02331
129.6	0.399132	3.58806	-3.04958	4.63975	-4.14337	-5.82935		129.6	-0.688024	2.81742	0.501791	4.99459	-2.81389	-5.20535
129.7	0.692459	1.16044	-3.03117	3.59135	-3.65094	-7.51586		129.7	-1.17739	2.70171	0.717967	5.04479	-3.12892	-5.40901
129.8	0.501391	-0.759635	-2.34705	3.18799	-3.08977	-8.74467		129.8	-1.46579	2.4899	0.808417	5.01051	-3.41167	-5.66652
129.9	-0.110388	-1.91459	-1.01967	3.37629	-2.76447	-9.19734		129.9	-1.49881	2.15464	0.779527	4.86818	-3.62427	-5.98912
130	-1.0076	-2.28794	0.755678	3.83227	-2.87499	-8.85142		130	-1.27541	1.69118	0.663682	4.59722	-3.72925	-6.3681
130.1	-2.03222	-2.03031	2.62039	4.18712	-3.41477	-7.98367		130.1	-0.853859	1.13068	0.507157	4.19651	-3.69588	-6.77779
130.2	-3.02531	-1.39057	4.15817	4.24657	-4.17674	-7.00521		130.2	-0.336369	0.545972	0.354105	3.69722	-3.50935	-7.17846
130.3	-3.80682	-0.63704	5.01772	4.06186	-4.85552	-6.28985		130.3	0.163723	0.0396746	0.233554	3.16036	-3.18036	-7.51963
130.4	-4.13349	0.0156499	5.01766	3.84383	-5.19003	-6.06559		130.4	0.55596	-0.284223	0.153194	2.6566	-2.74564	-7.7454
130.5	-3.72246	0.425728	4.19003	3.75741	-5.07381	-6.35764		130.5	0.791701	-0.354984	0.0984935	2.23855	-2.25897	-7.80715
130.6	-2.37656	0.533061	2.74239	3.72036	-4.55539	-7.01586		130.6	0.866511	-0.161441	0.0349126	1.92338	-1.77443	-7.68083
130.7	-0.147196	0.327583	0.990618	3.43852	-3.73567	-7.79694		130.7	0.811589	0.242678	-0.0848686	1.69483	-1.33278	-7.37906
130.8	2.57984	-0.143268	-0.71983	2.62677	-2.67421	-8.47664		130.8	0.678171	0.75651	-0.308159	1.51899	-0.951618	-6.95101
130.9	5.14755	-0.688651	-2.12246	1.26033	-1.38012	-8.89727		130.9	0.521412	1.26218	-0.667432	1.36518	-0.623619	-6.47009
131	6.86215	-0.963553	-3.08998	-0.359167	0.115896	-8.97415		131	0.387243	1.65538	-1.16922	1.21648	-0.325366	-6.01521
131.1	7.27791	-0.612469	-3.63383	-1.74901	1.68328	-8.67869		131.1	0.303154	1.87153	-1.79139	1.06657	-0.0314408	-5.65179
131.2	6.35293	0.545713	-3.87479	-2.50005	3.10477	-7.99166		131.2	0.272041	1.89895	-2.48554	0.911491	0.274332	-5.41541
131.3	4.40674	2.38512	-3.97949	-2.46715	4.12997	-6.87902		131.3	0.270362	1.7739	-3.18395	0.7441	0.593828	-5.30608
131.4	1.96422	4.45067	-4.11205	-1.76648	4.58636	-5.36851		131.4	0.250572	1.56308	-3.81102	0.557105	0.919333	-5.29583
131.5	-0.43227	6.1104	-4.38333	-0.697389	4.41825	-3.61449		131.5	0.149519	1.34092	-4.29846	0.356299	1.24073	-5.34449
131.6	-2.37849	6.82055	-4.8156	0.387059	3.71522	-1.92054		131.6	-0.0957793	1.17168	-4.6026	0.173824	1.54911	-5.41592
131.7	-3.67251	6.30851	-5.35196	1.21744	2.701	-0.675852		131.7	-0.527351	1.10068	-4.71745	0.0686507	1.83124	-5.48658
131.8	-4.31309	4.65406	-5.91003	1.65929	1.65553	-0.25066		131.8	-1.14567	1.14719	-4.67619	0.106457	2.06056	-5.54432
131.9	-4.45481	2.28402	-6.41865	1.69807	0.819977	-0.827037		131.9	-1.90085	1.29803	-4.541	0.33175	2.19554	-5.58312
132	-4.33575	-0.171019	-6.78291	1.42552	0.34262	-2.27144		132	-2.70278	1.50533	-4.38428	0.746306	2.18838	-5.60077
132.1	-4.16203	-2.11021	-6.85525	0.998175	0.241392	-4.20704		132.1	-3.44714	1.6922	-4.26795	1.30494	2.00262	-5.60233
132.2	-4.05888	-3.15822	-6.47011	0.578509	0.459765	-6.18332		132.2	-4.04231	1.77055	-4.22813	1.92822	1.63345	-5.6085
132.3	-4.09448	-3.24352	-5.54411	0.306657	0.908336	-7.84312		132.3	-4.42906	1.6685	-4.26943	2.52319	1.11752	-5.65913
132.4	-4.31726	-2.54955	-4.1798	0.336443	1.50678	-9.01126		132.4	-4.59313	1.35831	-4.37153	3.00901	0.527715	-5.80479
132.5	-4.75688	-1.35026	-2.6722	0.838821	2.12204	-9.67784		132.5	-4.56233	0.870493	-4.50253	3.33849	-0.0488223	-6.08964
132.6	-5.36388	0.10196	-1.42104	1.90303	2.51831	-9.87885		132.6	-4.39072	0.287533	-4.62773	3.50468	-0.5369	-6.53016
132.7	-5.97596	1.60069	-0.791888	3.47082	2.41049	-9.63379		132.7	-4.14021	-0.281294	-4.71326	3.53448	-0.892042	-7.09909
132.8	-6.35478	2.91165	-0.969549	5.29844	1.56164	-8.97874		132.8	-3.86714	-0.735827	-4.72986	3.4755	-1.10581	-7.7265
132.9	-6.30126	3.72258	-1.89716	6.99679	-0.0530892	-8.01805		132.9	-3.61508	-1.01564	-4.66274	3.3792	-1.20169	-8.32287
133	-5.71113	3.71706	-3.30255	8.12861	-2.14597	-6.984		133	-3.4151	-1.11237	-4.5235	3.28642	-1.22503	-8.80806
133.1	-4.61054	2.71587	-4.81409	8.34801	-4.18446	-6.2292		133.1	-3.28657	-1.06204	-4.35696	3.22057	-1.23178	-9.13557
133.2	-3.22152	0.837063	-6.11907	7.56148	-5.60843	-6.09068		133.2	-3.23537	-0.927819	-4.23379	3.18561	-1.27826	-9.30332
133.3	-1.85484	-1.4723	-7.04255	5.98815	-6.08591	-6.76296		133.3	-3.25124	-0.781381	-4.22816	3.16728	-1.4119	-9.34852
133.4	-0.755088	-3.60182	-7.48051	4.04269	-5.59631	-8.16468		133.4	-3.3061	-0.68852	-4.39071	3.13473	-1.65938	-9.33273
133.5	-0.0545502	-5.016	-7.3639	2.16593	-4.38188	-9.92255		133.5	-3.35963	-0.699629	-4.72932	3.04507	-2.01559	-9.32535
133.6	0.18742	-5.44304	-6.70094	0.695342	-2.81412	-11.4929		133.6	-3.37322	-0.843531	-5.20626	2.85103	-2.44011	-9.38941
133.7	-0.0506635	-4.92778	-5.64177	-0.211549	-1.28728	-12.4097		133.7	-3.32556	-1.12304	-5.75168	2.51538	-2.86209	-9.56968
133.8	-0.762314	-3.75474	-4.48831	-0.578987	-0.15538	-12.4553		133.8	-3.22048	-1.51085	-6.28536	2.03003	-3.19777	-9.88515
133.9	-1.87403	-2.30247	-3.63889	-0.541014	0.345017	-11.7511		133.9	-3.08672	-1.94901	-6.73927	1.42944	-3.3775	-10.3214
134	-3.224	-0.961834	-3.45026	-0.287672	0.118109	-10.6948		134	-2.96698	-2.35578	-7.07317	0.788632	-3.37308	-10.8244
134.1	-4.58706	-0.0601201	-4.08404	0.024911	-0.765114	-9.77963		134.1	-2.89657	-2.64179	-7.27952	0.202037	-3.21133	-11.3062
134.2	-5.68956	0.228388	-5.43555	0.285481	-2.08503	-9.40943		134.2	-2.88723	-2.73441	-7.37863	-0.250291	-2.9647	-11.6628
134.3	-6.27386	-0.0869047	-7.17746	0.378703	-3.53725	-9.75338		134.3	-2.92593	-2.60403	-7.41129	-0.53011	-2.72475	-11.8026
134.4	-6.20701	-0.845633	-8.8998	0.172231	-4.80635	-10.7228		134.4	-2.9838	-2.2796	-7.43141	-0.651734	-2.56992	-11.674
134.5	-5.54444	-1.84007	-10.2418	-0.407588	-5.61208	-12.0434		134.5	-3.02597	-1.84453	-7.4985	-0.673472	-2.54336	-11.2834
134.6	-4.51503	-2.87012	-10.9696	-1.25426	-5.75962	-13.3811		134.6	-3.02016	-1.4116	-7.66754	-0.675681	-2.64632	-10.6941
134.7	-3.43722	-3.73159	-11.019	-2.08144	-5.20148	-14.4009		134.7	-2.94138	-1.08624	-7.97672	-0.734199	-2.84485	-10.0073
134.8	-2.57485	-4.19933	-10.4904	-2.54567	-4.10932	-14.7802		134.8	-2.77759	-0.937334	-8.43462	-0.89869	-3.08531	-9.32847
134.9	-2.02468	-4.02507	-9.62712	-2.41063	-2.85858	-14.2808		134.9	-2.53249	-0.982459	-9.01283	-1.18189	-3.31096	-8.73328
135	-1.69597	-3.04684	-8.72741	-1.70142	-1.8933	-12.8254		135	-2.22442	-1.19147	-9.64861	-1.56375	-3.47566	-8.2468
135.1	-1.41298	-1.38533	-8.03562	-0.714237	-1.51712	-10.54		135.1	-1.88572	-1.50309	-10.2593	-2.00284	-3.55144	-7.84214
135.2	-1.03841	0.499205	-7.70605	0.0983208	-1.74982	-7.7366		135.2	-1.5594	-1.84717	-10.7636	-2.44679	-3.53059	-7.45837
135.3	-0.529386	1.95319	-7.84138	0.32579	-2.36254	-4.85302		135.3	-1.29058	-2.16413	-11.1039	-2.83971	-3.4238	-7.02766
135.4	0.0480529	2.43206	-8.51553	-0.249105	-3.03757	-2.39144		135.4	-1.11788	-2.41507	-11.2614	-3.12949	-3.25876	-6.4992
135.5	0.576972	1.77639	-9.74433	-1.57379	-3.53032	-0.779778		135.5	-1.0681	-2.58315	-11.263	-3.27894	-3.08008	-5.85234
135.6	0.910475	0.228929	-11.4233	-3.33736	-3.74296	-0.211233		135.6	-1.15175	-2.6708	-11.1707	-3.27718	-2.94398	-5.09933
135.7	0.942706	-1.72897	-13.2798	-5.10212	-3.71782	-0.576627		135.7	-1.35966	-2.69711	-11.0597	-3.14732	-2.9045	-4.28242
135.8	0.650019	-3.61322	-14.8923	-6.46664	-3.56506	-1.50941		135.8	-1.66406	-2.69871	-10.9937	-2.9437	-2.99603	-3.46564
135.9	0.0684408	-5.06929	-15.8167	-7.17904	-3.37337	-2.53021		135.9	-2.02654	-2.72828	-11.0085	-2.73551	-3.21923	-2.72453
136	-0.726547	-5.93625	-15.7516	-7.16856	-3.18272	-3.22932		136	-2.40884	-2.84241	-11.1103	-2.58233	-3.53948	-2.13423
136.1	-1.63699	-6.23397	-14.6836	-6.50733	-2.99097	-3.4007		136.1	-2.78147	-3.0824	-11.2817	-2.5134	-3.90029	-1.75633
136.2	-2.60857	-6.10598	-12.9197	-5.33388	-2.80641	-3.05949		136.2	-3.12768	-3.45619	-11.4871	-2.52049	-4.24243	-1.62698
136.3	-3.66869	-5.72751	-10.998	-3.79493	-2.72206	-2.38449		136.3	-3.44233	-3.92999	-11.6758	-2.56591	-4.52157	-1.7448
136.4	-4.85932	-5.22163	-9.44835	-2.05155	-2.88769	-1.5998		136.4	-3.72661	-4.43552	-11.7869	-2.59875	-4.71742	-2.06316
136.5	-6.10928	-4.64662	-8.60416	-0.337947	-3.43824	-0.892731		136.5	-3.98085	-4.88806	-11.7573	-2.57319	-4.83338	-2.4949
136.6	-7.19961	-4.0522	-8.50562	1.05095	-4.41462	-0.395653		136.6	-4.2038	-5.20953	-11.5363	-2.46053	-4.88922	-2.93325
136.7	-7.85799	-3.54956	-8.97909	1.83774	-5.68765	-0.226534		136.7	-4.39565	-5.34839	-11.1034	-2.25189	-4.91089	-3.28305
136.8	-7.9121	-3.32561	-9.7652	1.88989	-6.96138	-0.504888		136.8	-4.55967	-5.29168	-10.4827	-1.95509	-4.92131	-3.4882
136.9	-7.37321	-3.58064	-10.6194	1.27012	-7.88361	-1.31222		136.9	-4.70169	-5.06445	-9.74332	-1.58922	-4.93531	-3.5434
137	-6.4149	-4.4011	-11.3338	0.205195	-8.17895	-2.65418		137	-4.82813	-4.72115	-8.98132	-1.17982	-4.95904	-3.48669
137.1	-5.30099	-5.62254	-11.7234	-1.02119	-7.78281	-4.39443		137.1	-4.94004	-4.33155	-8.29256	-0.759252	-4.99225	-3.38138
137.2	-4.25584	-6.81776	-11.6327	-2.13212	-6.8599	-6.19177		137.2	-5.02327	-3.96465	-7.74552	-0.370282	-5.0266	-3.29313
137.3	-3.41163	-7.46414	-10.9215	-2.90283	-5.71429	-7.55088		137.3	-5.04572	-3.67513	-7.36784	-0.0674799	-5.04264	-3.27153
137.4	-2.84732	-7.19407	-9.52226	-3.1869	-4.66706	-8.02858		137.4	-4.96897	-3.49557	-7.14787	0.0931303	-5.00815	-3.34048
137.5	-2.61153	-5.97386	-7.53209	-2.9198	-3.9334	-7.45598		137.5	-4.76946	-3.43244	-7.04691	0.071745	-4.88146	-3.49596
137.6	-2.71993	-4.10513	-5.26596	-2.13344	-3.55056	-6.01782		137.6	-4.45834	-3.46577	-7.01026	-0.137035	-4.62388	-3.70961
137.7	-3.14078	-2.07333	-3.18156	-0.94868	-3.42071	-4.16771		137.7	-4.08591	-3.55086	-6.97625	-0.496017	-4.22007	-3.93573
137.8	-3.78651	-0.397942	-1.72966	0.452455	-3.39443	-2.43656		137.8	-3.72841	-3.6217	-6.88557	-0.933161	-3.69596	-4.11954
137.9	-4.51111	0.517233	-1.2108	1.81575	-3.37092	-1.26931		137.9	-3.46484	-3.60285	-6.69261	-1.36231	-3.11812	-4.20437
138	-5.08353	0.50988	-1.69838	2.81757	-3.306	-0.884132		138	-3.35111	-3.42987	-6.37608	-1.7068	-2.57298	-4.13933
138.1	-5.24105	-0.299844	-3.0278	3.09608	-3.16043	-1.23266		138.1	-3.40395	-3.07532	-5.94513	-1.92072	-2.13909	-3.89345
138.2	-4.80446	-1.59408	-4.86463	2.39243	-2.85192	-2.06493		138.2	-3.6005	-2.56466	-5.44148	-1.99782	-1.86421	-3.47262
138.3	-3.80789	-2.97903	-6.78932	0.687399	-2.2608	-3.03867		138.3	-3.89021	-1.97256	-4.93655	-1.9668	-1.75245	-2.92722
138.4	-2.569	-4.11618	-8.35603	-1.71153	-1.30873	-3.85859		138.4	-4.21366	-1.39907	-4.51712	-1.87865	-1.76553	-2.34247
138.5	-1.58081	-4.77207	-9.18701	-4.21279	-0.0966109	-4.349		138.5	-4.51871	-0.93661	-4.26131	-1.79271	-1.83787	-1.81311
138.6	-1.29568	-4.78496	-9.07783	-6.16133	1.02621	-4.43691		138.6	-4.76893	-0.64116	-4.21611	-1.7639	-1.89771	-1.41721
138.7	-1.93428	-4.08058	-8.05349	-7.09042	1.64437	-4.09634		138.7	-4.94614	-0.518688	-4.38063	-1.83372	-1.88613	-1.19794
138.8	-3.36756	-2.68194	-6.34235	-6.87753	1.4845	-3.28872		138.8	-5.04891	-0.529799	-4.70297	-2.02205	-1.76861	-1.15615
138.9	-5.15412	-0.790365	-4.30661	-5.76868	0.516329	-2.01181		138.9	-5.0897	-0.607096	-5.09319	-2.31867	-1.5398	-1.25554
139	-6.75291	1.21705	-2.35939	-4.21353	-1.04138	-0.396791		139	-5.09252	-0.67842	-5.44961	-2.67834	-1.22275	-1.43762
139.1	-7.77237	2.87154	-0.938361	-2.65957	-2.76722	1.24318		139.1	-5.09008	-0.688403	-5.68852	-3.02585	-0.861247	-1.64025
139.2	-8.11018	3.7755	-0.401825	-1.42129	-4.15571	2.48483		139.2	-5.11881	-0.614075	-5.76717	-3.27039	-0.51037	-1.81435
139.3	-7.90579	3.75674	-0.917182	-0.672368	-4.78031	2.98121		139.3	-5.20841	-0.469422	-5.69406	-3.33017	-0.227522	-1.93331
139.4	-7.39456	2.94932	-2.41315	-0.458941	-4.43806	2.56269		139.4	-5.37007	-0.298269	-5.52309	-3.15986	-0.0617914	-1.9943
139.5	-6.79911	1.68408	-4.5265	-0.734515	-3.19757	1.29098		139.5	-5.58988	-0.160845	-5.33611	-2.76873	-0.0390855	-2.01201
139.6	-6.25816	0.328348	-6.69067	-1.38586	-1.37302	-0.558797		139.6	-5.83184	-0.117597	-5.2201	-2.22143	-0.151129	-2.01286
139.7	-5.77703	-0.804162	-8.33212	-2.2249	0.583697	-2.57376		139.7	-6.05129	-0.218083	-5.24549	-1.61904	-0.353201	-2.03687
139.8	-5.28893	-1.51236	-9.08683	-3.01833	2.22941	-4.32814		139.8	-6.21402	-0.49227	-5.45196	-1.06699	-0.572429	-2.13722
139.9	-4.76299	-1.76379	-8.92609	-3.51535	3.29369	-5.50968		139.9	-6.30913	-0.946069	-5.84226	-0.644021	-0.728967	-2.37171
140	-4.29633	-1.71545	-8.12652	-3.46963	3.70411	-5.9982		140	-6.34925	-1.55651	-6.38132	-0.383004	-0.762186	-2.78314
140.1	-4.09211	-1.65708	-7.11305	-2.72794	3.49968	-5.88103		140.1	-6.361	-2.27105	-7.00185	-0.270351	-0.650078	-3.37622
140.2	-4.32907	-1.86247	-6.28054	-1.31739	2.72082	-5.38585		140.2	-6.37465	-3.01808	-7.61478	-0.258786	-0.414195	-4.10662
140.3	-5.03255	-2.44874	-5.89926	0.487867	1.41221	-4.73798		140.3	-6.41748	-3.72817	-8.12338	-0.286249	-0.107888	-4.88762
140.4	-6.04753	-3.34537	-6.08125	2.21364	-0.26036	-4.11068		140.4	-6.51057	-4.35151	-8.44539	-0.293366	0.205269	-5.61384
140.5	-7.09823	-4.39019	-6.77402	3.36315	-1.95074	-3.69701		140.5	-6.66712	-4.86323	-8.53338	-0.234224	0.471904	-6.19479
140.6	-7.92052	-5.45155	-7.81653	3.6161	-3.21054	-3.71771		140.6	-6.89186	-5.26169	-8.38811	-0.0815367	0.660081	-6.58271
140.7	-8.36982	-6.49753	-8.99455	2.97697	-3.70254	-4.3831		140.7	-7.17927	-5.56292	-8.05732	0.170727	0.760399	-6.7816
140.8	-8.45438	-7.50598	-10.1023	1.77772	-3.33194	-5.75123		140.8	-7.51092	-5.79198	-7.61935	0.506712	0.779986	-6.839
140.9	-8.3099	-8.37173	-10.9509	0.4938	-2.24987	-7.5975		140.9	-7.8508	-5.97363	-7.16002	0.891989	0.735651	-6.82935
141	-8.13782	-8.94274	-11.337	-0.475756	-0.770302	-9.43558		141	-8.14496	-6.1263	-6.75299	1.2788	0.647872	-6.83238
141.1	-8.12264	-9.1222	-11.0593	-0.925805	0.769169	-10.7143		141.1	-8.32806	-6.25943	-6.44626	1.61338	0.543305	-6.91212
141.2	-8.38174	-8.91275	-10.0008	-0.855507	2.1261	-11.0548		141.2	-8.33878	-6.3746	-6.25644	1.84999	0.459452	-7.1061
141.3	-8.91949	-8.37083	-8.18651	-0.380443	3.15976	-10.4349		141.3	-8.13906	-6.46855	-6.17172	1.96614	0.440305	-7.42376
141.4	-9.59749	-7.57791	-5.86255	0.370776	3.78271	-9.16847		141.4	-7.73049	-6.53442	-6.16072	1.97267	0.521509	-7.84666
141.5	-10.1749	-6.63338	-3.46339	1.27015	3.93482	-7.70918		141.5	-7.15907	-6.56073	-6.18121	1.91163	0.712518	-8.32865
141.6	-10.4011	-5.65775	-1.48059	2.1964	3.62667	-6.48551		141.6	-6.5043	-6.52917	-6.188	1.84149	0.989811	-8.79795
141.7	-10.0742	-4.80355	-0.317918	3.08009	2.95041	-5.83419		141.7	-5.85861	-6.41717	-6.14078	1.81477	1.30183	-9.17007
141.8	-9.09292	-4.25237	-0.193488	3.84782	2.00744	-5.93254		141.8	-5.30349	-6.20474	-6.01209	1.8593	1.58334	-9.37177
141.9	-7.44182	-4.1257	-1.06615	4.37051	0.943171	-6.74146		141.9	-4.88974	-5.88171	-5.79795	1.97038	1.77255	-9.36597
142	-5.21476	-4.40673	-2.67233	4.51027	-0.0132747	-8.03555		142	-4.63022	-5.45428	-5.52813	2.11338	1.82563	-9.16492
142.1	-2.6523	-4.94242	-4.64095	4.1882	-0.585865	-9.51103		142.1	-4.50357	-4.9485	-5.2666	2.23664	1.72647	-8.82633
142.2	-0.152413	-5.50996	-6.58708	3.47408	-0.570264	-10.8862		142.2	-4.46702	-4.41068	-5.09755	2.28722	1.49083	-8.43121
142.3	1.79362	-5.89889	-8.16481	2.57843	0.0366059	-11.9116		142.3	-4.47432	-3.89955	-5.09895	2.2263	1.1638	-8.05589
142.4	2.76112	-5.96101	-9.10999	1.78467	1.01145	-12.3611		142.4	-4.49138	-3.47115	-5.31544	2.04251	0.809232	-7.75331
142.5	2.52241	-5.60201	-9.29967	1.32338	1.97239	-12.0773		142.5	-4.50512	-3.16166	-5.7389	1.75657	0.493236	-7.54623
142.6	1.12724	-4.76033	-8.76304	1.25089	2.53573	-11.0264		142.6	-4.52478	-2.97596	-6.30632	1.41062	0.267737	-7.42874
142.7	-1.10408	-3.45123	-7.69654	1.41262	2.44626	-9.3369		142.7	-4.57831	-2.88553	-6.91778	1.0529	0.16329	-7.37365
142.8	-3.71087	-1.856	-6.47243	1.5052	1.67152	-7.29636		142.8	-4.70937	-2.83641	-7.46616	0.728064	0.186336	-7.3405
142.9	-6.22868	-0.314465	-5.55484	1.23979	0.440504	-5.29889		142.9	-4.97185	-2.76426	-7.86305	0.472687	0.320183	-7.28404
143	-8.29823	0.772067	-5.31259	0.47938	-0.846102	-3.71769		143	-5.41625	-2.61183	-8.05431	0.316663	0.527463	-7.16297
143.1	-9.72155	1.11128	-5.88634	-0.664831	-1.77689	-2.78808		143.1	-6.06904	-2.34308	-8.02647	0.281666	0.755387	-6.94682
143.2	-10.4649	0.649508	-7.14377	-1.85429	-2.09279	-2.56533		143.2	-6.91278	-1.95124	-7.80626	0.376029	0.945387	-6.62229
143.3	-10.6347	-0.396499	-8.6793	-2.66457	-1.74527	-2.96517		143.3	-7.87958	-1.46321	-7.45441	0.586058	1.0442	-6.19924
143.4	-10.4084	-1.64662	-9.9642	-2.80102	-0.883077	-3.83686		143.4	-8.86145	-0.940369	-7.05052	0.870484	1.01972	-5.71196
143.5	-10.003	-2.71505	-10.5882	-2.23346	0.23184	-4.99604		143.5	-9.7353	-0.47032	-6.6743	1.16619	0.875052	-5.21558
143.6	-9.66978	-3.29068	-10.3886	-1.15165	1.33496	-6.17796		143.6	-10.396	-0.144057	-6.38721	1.4085	0.652732	-4.78142
143.7	-9.67686	-3.18008	-9.41936	0.168848	2.26211	-7.0756		143.7	-10.7814	-0.0255373	-6.21644	1.55773	0.42435	-4.48451
143.8	-10.2072	-2.35111	-7.89253	1.53579	2.9379	-7.45285		143.8	-10.8861	-0.12579	-6.14653	1.61487	0.266815	-4.38386
143.9	-11.2499	-0.941267	-6.11369	2.87914	3.30445	-7.21173		143.9	-10.7578	-0.390289	-6.12484	1.61791	0.23649	-4.50159
144	-12.5499	0.762372	-4.42133	4.18261	3.26661	-6.39456		144	-10.4769	-0.711947	-6.07691	1.61921	0.351121	-4.80896
144.1	-13.6745	2.33547	-3.12848	5.35517	2.69133	-5.16926		144.1	-10.1285	-0.967444	-5.92712	1.65845	0.586498	-5.22748
144.2	-14.1693	3.28637	-2.43355	6.15861	1.55613	-3.79361		144.2	-9.7785	-1.06181	-5.62193	1.74573	0.885957	-5.64517
144.3	-13.7283	3.23049	-2.36725	6.27784	0.0764128	-2.58795		144.3	-9.46051	-0.955862	-5.14979	1.864	1.17841	-5.94455
144.4	-12.3352	2.09524	-2.81599	5.53203	-1.3332	-1.95616		144.4	-9.17707	-0.667878	-4.54608	1.98424	1.39874	-6.03275
144.5	-10.2642	0.158844	-3.56932	4.04199	-2.21098	-2.24886		144.5	-8.90918	-0.258062	-3.88132	2.07961	1.50431	-5.86752
144.6	-8.00846	-2.01877	-4.36645	2.21115	-2.23758	-3.58793		144.6	-8.62608	0.19173	-3.24164	2.13312	1.48164	-5.46845
144.7	-6.11691	-3.7244	-4.94388	0.531098	-1.36164	-5.7191		144.7	-8.2899	0.600276	-2.70536	2.13452	1.34628	-4.90869
144.8	-4.94515	-4.3569	-5.07157	-0.642648	0.17184	-8.0133		144.8	-7.85813	0.90699	-2.32376	2.0728	1.13736	-4.29209
144.9	-4.54314	-3.69395	-4.59729	-1.18734	1.90861	-9.68013		144.9	-7.29158	1.08551	-2.1077	1.93321	0.909131	-3.72609
145	-4.68426	-2.00072	-3.49113	-1.18076	3.34554	-10.066		145	-6.56927	1.14975	-2.02489	1.70515	0.722772	-3.29893
145.1	-5.00268	0.154497	-1.93775	-0.790398	4.08861	-8.92634		145.1	-5.70487	1.15046	-2.01045	1.3972	0.634763	-3.06506
145.2	-5.18445	2.18068	-0.3252	-0.189381	3.97746	-6.49538		145.2	-4.75184	1.16018	-1.98779	1.04857	0.68267	-3.03731
145.3	-5.11563	3.67619	0.912273	0.46969	3.12972	-3.36904		145.3	-3.79236	1.25148	-1.89116	0.723672	0.872966	-3.17974
145.4	-4.86428	4.46638	1.45522	1.07842	1.87657	-0.291386		145.4	-2.91576	1.47994	-1.68391	0.489576	1.17399	-3.4095
145.5	-4.49202	4.59417	1.22424	1.55965	0.636942	2.06299		145.5	-2.19306	1.87128	-1.36489	0.389774	1.51888	-3.61072
145.6	-3.90984	4.27288	0.373507	1.82988	-0.247305	3.27057		145.6	-1.65675	2.40717	-0.963973	0.429982	1.8209	-3.66408
145.7	-2.9185	3.79722	-0.748342	1.80951	-0.613244	3.22744		145.7	-1.29814	3.02048	-0.532985	0.582388	2.00095	-3.48618
145.8	-1.39524	3.42758	-1.72064	1.47823	-0.476772	2.09236		145.8	-1.07829	3.61168	-0.13599	0.798226	2.0162	-3.06215
145.9	0.525527	3.29838	-2.18812	0.923459	0.0599759	0.182237		145.9	-0.947964	4.08315	0.160084	1.0216	1.87466	-2.45821
146	2.47309	3.39574	-1.982	0.351161	0.890837	-2.11632		146	-0.868404	4.37148	0.301176	1.19967	1.62954	-1.80247
146.1	3.976	3.64734	-1.17336	0.00870111	1.90182	-4.37746		146.1	-0.819884	4.46295	0.264275	1.29032	1.35811	-1.24398
146.2	4.63803	4.04262	-0.0459706	0.0623607	2.90636	-6.15476		146.2	-0.794901	4.38783	0.0684803	1.2687	1.13649	-0.907136
146.3	4.2774	4.634	1.05695	0.514512	3.62568	-7.00862		146.3	-0.788055	4.20389	-0.226168	1.12926	1.01965	-0.857643
146.4	3.00045	5.38582	1.87164	1.21465	3.77264	-6.62625		146.4	-0.794724	3.97572	-0.53539	0.884518	1.03239	-1.08802
146.5	1.15125	6.06924	2.25522	1.94825	3.23267	-4.98903		146.5	-0.819733	3.75541	-0.775855	0.5622	1.17063	-1.52571
146.6	-0.805687	6.3566	2.15163	2.48191	2.16782	-2.4715		146.6	-0.885456	3.57029	-0.893816	0.203673	1.40822	-2.05944
146.7	-2.46879	6.01416	1.54213	2.61665	0.939461	0.200966		146.7	-1.03127	3.42064	-0.883824	-0.136462	1.70315	-2.56715
146.8	-3.65017	5.05612	0.460811	2.23666	-0.0785049	2.22111		146.8	-1.29956	3.29132	-0.789888	-0.398468	1.99956	-2.93865
146.9	-4.35962	3.73566	-0.952508	1.3517	-0.63686	2.99908		146.9	-1.71573	3.16879	-0.687067	-0.532246	2.2312	-3.09238
147	-4.69091	2.39911	-2.41624	0.102258	-0.637771	2.35726		147	-2.27004	3.04831	-0.654206	-0.514872	2.33241	-2.98711
147.1	-4.7479	1.3395	-3.5538	-1.2922	-0.109741	0.549994		147.1	-2.91142	2.92534	-0.749152	-0.36029	2.25827	-2.62934
147.2	-4.6054	0.715331	-4.03254	-2.60089	0.853598	-1.85338		147.2	-3.55834	2.78233	-0.998408	-0.115833	2.00612	-2.07753
147.3	-4.33499	0.527496	-3.71439	-3.64953	2.10281	-4.17013		147.3	-4.1246	2.58702	-1.39864	0.154123	1.62521	-1.4351
147.4	-4.03579	0.650245	-2.75368	-4.28545	3.42574	-5.84604		147.4	-4.54654	2.30488	-1.9228	0.388022	1.20185	-0.829013
147.5	-3.87415	0.883472	-1.55078	-4.30406	4.537	-6.5387		147.5	-4.80061	1.91657	-2.52656	0.547908	0.828487	-0.3744
147.6	-4.03528	1.09991	-0.591213	-3.53063	5.09898	-6.13334		147.6	-4.90432	1.43023	-3.15495	0.63079	0.572929	-0.136483
147.7	-4.60179	1.31285	-0.23404	-1.92307	4.82869	-4.72961		147.7	-4.90385	0.882504	-3.75088	0.665706	0.46001	-0.109578
147.8	-5.44741	1.59921	-0.614716	0.304058	3.62236	-2.5879		147.8	-4.85733	0.328406	-4.26196	0.699397	0.469864	-0.2217
147.9	-6.26527	1.95204	-1.66005	2.69025	1.64602	-0.0727327		147.9	-4.8203	-0.176224	-4.64651	0.779595	0.546486	-0.363953
148	-6.72035	2.20279	-3.1804	4.67029	-0.660846	2.37215		148	-4.8352	-0.591209	-4.88051	0.942404	0.615405	-0.429556
148.1	-6.6259	2.06565	-4.93225	5.80389	-2.70288	4.29511		148.1	-4.92469	-0.901657	-4.96688	1.20739	0.606142	-0.348621
148.2	-6.02183	1.27288	-6.65556	5.92453	-3.9644	5.31445		148.2	-5.08812	-1.11893	-4.94036	1.57746	0.472735	-0.107048
148.3	-5.1248	-0.244792	-8.11236	5.19997	-4.17939	5.25693		148.3	-5.30292	-1.27158	-4.85815	2.03599	0.205377	0.254941
148.4	-4.23196	-2.25358	-9.14053	4.02565	-3.40501	4.24554		148.4	-5.52805	-1.39069	-4.77948	2.54002	-0.169113	0.65663
148.5	-3.64215	-4.25518	-9.66999	2.83023	-1.99813	2.67851		148.5	-5.71136	-1.50286	-4.74577	3.02134	-0.594602	0.998658
148.6	-3.56867	-5.68402	-9.64086	1.92445	-0.469353	1.09301		148.6	-5.80169	-1.63085	-4.77171	3.39749	-0.997637	1.18807
148.7	-4.06155	-6.17959	-8.95357	1.46562	0.664814	-0.06106		148.7	-5.76275	-1.79488	-4.84248	3.5913	-1.30374	1.15964
148.8	-5.00108	-5.71526	-7.5318	1.47556	1.06187	-0.565251		148.8	-5.58517	-2.00724	-4.91982	3.55152	-1.45431	0.88784
148.9	-6.12673	-4.56228	-5.50075	1.90387	0.696142	-0.477483		148.9	-5.29243	-2.26237	-4.9536	3.27077	-1.42176	0.391717
149	-7.11328	-3.16613	-3.2636	2.64163	-0.165115	-0.063385		149	-4.93295	-2.52699	-4.89654	2.79078	-1.2213	-0.267722
149.1	-7.68752	-1.94488	-1.35615	3.5096	-1.11934	0.307766		149.1	-4.56345	-2.73863	-4.71803	2.19141	-0.909971	-0.996227
149.2	-7.70125	-1.14133	-0.213306	4.26442	-1.82934	0.290019		149.2	-4.23296	-2.81974	-4.41398	1.56673	-0.569962	-1.68403
149.3	-7.1515	-0.807011	-0.018121	4.65189	-2.13433	-0.318872		149.3	-3.97064	-2.70534	-4.00593	0.998795	-0.282353	-2.22974
149.4	-6.13743	-0.862898	-0.675035	4.47144	-2.02292	-1.50954		149.4	-3.77997	-2.37366	-3.53154	0.540073	-0.102008	-2.56292
149.5	-4.78554	-1.18932	-1.81782	3.59882	-1.58138	-3.07125		149.5	-3.64101	-1.86414	-3.03628	0.205932	-0.0441661	-2.66151
149.6	-3.24633	-1.65819	-2.97481	2.01403	-0.913598	-4.69337		149.6	-3.52275	-1.2682	-2.57172	-0.0232332	-0.0825152	-2.55624
149.7	-1.74386	-2.13428	-3.75477	-0.102508	-0.107582	-6.06195		149.7	-3.39575	-0.699356	-2.19428	-0.191874	-0.159045	-2.32177
149.8	-0.514683	-2.43304	-3.96222	-2.35604	0.704989	-6.91535		149.8	-3.2393	-0.258327	-1.95329	-0.355602	-0.205798	-2.05407
149.9	0.259757	-2.3249	-3.62089	-4.26475	1.32816	-7.07013		149.9	-3.04705	-0.00585994	-1.87408	-0.566268	-0.167979	-1.84185
150	0.493455	-1.6236	-2.94352	-5.41954	1.60076	-6.43567		150	-2.82974	0.0462691	-1.94808	-0.858515	-0.0176415	-1.74351
150.1	0.227428	-0.30886	-2.20354	-5.62923	1.48435	-5.03162		150.1	-2.61402	-0.0713147	-2.13561	-1.24251	0.243885	-1.77621
150.2	-0.400709	1.38337	-1.60543	-4.96804	1.06774	-2.98546		150.2	-2.43733	-0.303433	-2.37707	-1.70411	0.59117	-1.91644
150.3	-1.20626	2.97786	-1.22139	-3.75594	0.513952	-0.583122		150.3	-2.34266	-0.589496	-2.60741	-2.20976	0.981006	-2.11186
150.4	-2.05116	3.95144	-1.05609	-2.43019	0.012879	1.7286		150.4	-2.37643	-0.876723	-2.77567	-2.71093	1.36113	-2.30139
150.5	-2.84205	3.95501	-1.11527	-1.39133	-0.239133	3.42067		150.5	-2.58276	-1.12704	-2.85834	-3.14883	1.67691	-2.43549
150.6	-3.46723	2.93522	-1.40395	-0.879511	-0.0986696	4.07348		150.6	-2.98888	-1.32028	-2.86365	-3.4638	1.87424	-2.49246
150.7	-3.845	1.1258	-1.91704	-0.939686	0.477817	3.54435		150.7	-3.58856	-1.45766	-2.82614	-3.61061	1.90674	-2.48393
150.8	-3.99316	-1.05869	-2.6141	-1.4586	1.43639	1.97952		150.8	-4.33451	-1.56384	-2.79417	-3.57563	1.74612	-2.44912
150.9	-4.03405	-3.14026	-3.40129	-2.26347	2.61661	-0.265853		150.9	-5.14722	-1.68308	-2.81194	-3.38765	1.39016	-2.44254
151	-4.1477	-4.75302	-4.12296	-3.19533	3.76952	-2.70285		151	-5.93735	-1.86939	-2.9085	-3.11446	0.865998	-2.52096
151.1	-4.52812	-5.72597	-4.59089	-4.12461	4.60429	-4.83163		151.1	-6.63154	-2.17219	-3.09776	-2.84419	0.227181	-2.73513
151.2	-5.3597	-6.07218	-4.67826	-4.92101	4.88065	-6.29318		151.2	-7.19136	-2.61885	-3.38295	-2.65686	-0.456074	-3.1197
151.3	-6.75394	-5.91351	-4.3802	-5.43028	4.45471	-6.97312		151.3	-7.61393	-3.20247	-3.75683	-2.59928	-1.11395	-3.68127
151.4	-8.6479	-5.41942	-3.84507	-5.457	3.24701	-7.03039		151.4	-7.92254	-3.88024	-4.19671	-2.67589	-1.69782	-4.38563
151.5	-10.7092	-4.76849	-3.32444	-4.85177	1.2576	-6.77037		151.5	-8.15578	-4.58191	-4.66297	-2.85641	-2.19276	-5.15672
151.6	-12.4213	-4.12994	-3.0774	-3.67013	-1.40236	-6.47835		151.6	-8.35474	-5.22836	-5.1041	-3.08911	-2.61675	-5.89342
151.7	-13.3227	-3.65068	-3.2457	-2.22383	-4.45056	-6.32392		151.7	-8.5524	-5.75352	-5.46616	-3.31423	-3.00969	-6.49825
151.8	-13.2048	-3.47626	-3.845	-0.985106	-7.42647	-6.36475		151.8	-8.76969	-6.12245	-5.70648	-3.47464	-3.41622	-6.90608
151.9	-12.2018	-3.76413	-4.82293	-0.37341	-9.79215	-6.62634		151.9	-9.01561	-6.33693	-5.809	-3.52634	-3.86814	-7.10193
152	-10.7233	-4.61541	-6.06952	-0.571364	-11.1014	-7.12077		152	-9.28717	-6.43071	-5.79504	-3.44834	-4.37371	-7.12034
152.1	-9.23487	-5.97014	-7.41205	-1.45131	-11.171	-7.81813		152.1	-9.56628	-6.45772	-5.72365	-3.24672	-4.91783	-7.02741
152.2	-8.08847	-7.56708	-8.59321	-2.69375	-10.1649	-8.55348		152.2	-9.81621	-6.477	-5.67573	-2.95195	-5.46847	-6.89348
152.3	-7.43222	-8.99316	-9.3305	-3.94826	-8.51263	-9.03502		152.3	-9.98528	-6.53854	-5.72478	-2.61525	-5.98422	-6.76712
152.4	-7.22738	-9.86385	-9.41615	-4.8957	-6.73003	-8.97944		152.4	-10.0237	-6.67267	-5.90863	-2.30437	-6.41911	-6.66563
152.5	-7.35334	-9.98632	-8.76911	-5.2856	-5.24354	-8.3026		152.5	-9.90501	-6.88428	-6.21605	-2.09152	-6.72577	-6.58371
152.6	-7.72795	-9.41207	-7.48683	-4.99037	-4.29449	-7.19901		152.6	-9.64187	-7.15324	-6.59646	-2.03166	-6.86284	-6.50982
152.7	-8.32829	-8.39923	-5.86569	-4.0743	-3.91315	-6.03225		152.7	-9.28784	-7.43583	-6.98094	-2.13825	-6.80709	-6.43812
152.8	-9.14464	-7.3202	-4.35367	-2.79859	-3.99028	-5.14461		152.8	-8.91984	-7.66637	-7.30409	-2.37384	-6.56586	-6.36645
152.9	-10.1047	-6.53135	-3.46453	-1.49339	-4.36951	-4.71349		152.9	-8.60856	-7.768	-7.52121	-2.66275	-6.18149	-6.28826
153	-11.0027	-6.24126	-3.56557	-0.419251	-4.90614	-4.69624		153	-8.39482	-7.67341	-7.61748	-2.92029	-5.72333	-6.18613
153.1	-11.5222	-6.46568	-4.67892	0.266832	-5.52077	-4.8822		153.1	-8.28245	-7.34732	-7.61031	-3.08088	-5.27009	-6.03749
153.2	-11.3626	-7.04868	-6.44993	0.433206	-6.13536	-5.04505		153.2	-8.2473	-6.80365	-7.54086	-3.11463	-4.89284	-5.82805
153.3	-10.4033	-7.72726	-8.30352	-0.0516191	-6.61569	-5.08573		153.3	-8.25133	-6.10461	-7.4634	-3.03411	-4.64185	-5.5679
153.4	-8.84923	-8.22292	-9.71265	-1.20625	-6.78078	-5.06783		153.4	-8.25427	-5.33985	-7.43712	-2.8892	-4.5379	-5.29501
153.5	-7.18634	-8.28034	-10.3812	-2.79719	-6.47859	-5.14578		153.5	-8.21896	-4.59771	-7.51758	-2.75084	-4.57135	-5.06069
153.6	-5.94574	-7.68338	-10.3165	-4.37844	-5.69127	-5.408		153.6	-8.11396	-3.94079	-7.74364	-2.6857	-4.71087	-4.9067
153.7	-5.43158	-6.3431	-9.76059	-5.48271	-4.56716	-5.79157		153.7	-7.91748	-3.39302	-8.12199	-2.7319	-4.91443	-4.84387
153.8	-5.60133	-4.36202	-9.04857	-5.82952	-3.38236	-6.08182		153.8	-7.62153	-2.93826	-8.61444	-2.8907	-5.13881	-4.84508
153.9	-6.17812	-2.02358	-8.47128	-5.42374	-2.45984	-6.02666		153.9	-7.23633	-2.5295	-9.14114	-3.13549	-5.34474	-4.85783
154	-6.83464	0.249261	-8.14996	-4.522	-2.09937	-5.47449		154	-6.79438	-2.10575	-9.60333	-3.42496	-5.49895	-4.82607
154.1	-7.29602	2.01976	-8.09936	-3.52688	-2.46319	-4.55689		154.1	-6.35224	-1.61212	-9.91733	-3.71039	-5.58126	-4.70839
154.2	-7.40316	3.01463	-8.32234	-2.82219	-3.47637	-3.6636		154.2	-5.98221	-1.0189	-10.0435	-3.9371	-5.59076	-4.48477
154.3	-7.12768	3.20423	-8.85463	-2.6383	-4.86313	-3.21548		154.3	-5.75067	-0.331375	-9.99338	-4.04809	-5.54852	-4.15466
154.4	-6.54345	2.76854	-9.70861	-2.96694	-6.28505	-3.41446		154.4	-5.69232	0.411281	-9.81732	-3.99648	-5.49509	-3.732
154.5	-5.80435	1.99176	-10.7856	-3.58388	-7.4507	-4.07645		154.5	-5.79481	1.14567	-9.58135	-3.76039	-5.48132	-3.24168
154.6	-5.07356	1.19963	-11.8361	-4.19309	-8.18395	-4.7341		154.6	-6.00344	1.79806	-9.34337	-3.35351	-5.55372	-2.71762
154.7	-4.45438	0.707574	-12.5196	-4.58065	-8.40704	-4.91299		154.7	-6.24171	2.29816	-9.13805	-2.82523	-5.73637	-2.2024
154.8	-4.00902	0.738152	-12.5361	-4.65413	-8.14221	-4.34228		154.8	-6.43493	2.59226	-8.97225	-2.24878	-6.01808	-1.74431
154.9	-3.84623	1.34304	-11.7879	-4.41911	-7.53479	-3.04448		154.9	-6.53104	2.6574	-8.83398	-1.70145	-6.3497	-1.39096
155	-4.11281	2.35743	-10.4482	-3.90571	-6.77711	-1.28418		155	-6.51491	2.51058	-8.70288	-1.24165	-6.65705	-1.17463
155.1	-4.91292	3.46504	-8.86091	-3.09312	-6.06269	0.544072		155.1	-6.40748	2.20984	-8.55834	-0.894542	-6.86672	-1.10084
155.2	-6.19437	4.34481	-7.38821	-1.91975	-5.57028	2.03935		155.2	-6.25365	1.84382	-8.38219	-0.651778	-6.93096	-1.14525
155.3	-7.68817	4.80127	-6.30484	-0.364839	-5.45724	2.92746		155.3	-6.10568	1.50826	-8.15499	-0.483988	-6.84045	-1.26051
155.4	-8.97824	4.74751	-5.71509	1.43414	-5.79798	3.11745		155.4	-6.00425	1.28126	-7.85464	-0.358065	-6.62319	-1.39261
155.5	-9.65196	4.13959	-5.558	3.15131	-6.4874	2.67691		155.5	-5.96556	1.20306	-7.46161	-0.246892	-6.3345	-1.49697
155.6	-9.46283	2.97622	-5.6527	4.37581	-7.24879	1.76091		155.6	-5.98219	1.266	-6.97336	-0.126741	-6.04277	-1.55018
155.7	-8.46859	1.35668	-5.79943	4.78259	-7.73693	0.532385		155.7	-6.03063	1.418	-6.41752	0.0264106	-5.81285	-1.55395
155.8	-7.0218	-0.476324	-5.8707	4.28977	-7.6882	-0.879287		155.8	-6.07505	1.58046	-5.84985	0.233081	-5.69065	-1.53192
155.9	-5.57687	-2.09787	-5.86511	3.07867	-7.04077	-2.40904		155.9	-6.07011	1.67536	-5.33715	0.498924	-5.69536	-1.52145
156	-4.51256	-3.01808	-5.86005	1.4887	-5.95511	-3.97045		156	-5.96643	1.64933	-4.93505	0.801654	-5.81841	-1.56261
156.1	-4.02784	-2.93609	-5.84617	-0.114518	-4.7465	-5.37402		156.1	-5.72144	1.48627	-4.6739	1.0884	-6.02816	-1.68421
156.2	-4.08013	-1.86722	-5.67974	-1.44319	-3.75718	-6.32214		156.2	-5.31381	1.20385	-4.55343	1.28495	-6.27349	-1.89464
156.3	-4.41573	-0.129687	-5.15453	-2.30315	-3.27617	-6.50809		156.3	-4.7537	0.846631	-4.54729	1.32039	-6.48977	-2.18228
156.4	-4.73722	1.77752	-4.21947	-2.53808	-3.44778	-5.81758		156.4	-4.08533	0.477994	-4.6157	1.15417	-6.61283	-2.52366
156.5	-4.83251	3.3221	-3.08669	-2.05055	-4.23355	-4.40636		156.5	-3.38037	0.169819	-4.71868	0.793921	-6.59534	-2.89229
156.6	-4.60126	4.10492	-2.13764	-0.905722	-5.45734	-2.66996		156.6	-2.71969	-0.0101617	-4.82513	0.296971	-6.42234	-3.26086
156.7	-4.02883	3.97072	-1.73225	0.613629	-6.85718	-1.10634		156.7	-2.16809	-0.0111689	-4.91708	-0.246037	-6.12144	-3.5964
156.8	-3.1504	3.02259	-2.02514	2.05328	-8.1545	-0.155569		156.8	-1.75718	0.18615	-4.98609	-0.739506	-5.75883	-3.8548
156.9	-2.02954	1.5728	-2.94869	2.95494	-9.13609	-0.027874		156.9	-1.48118	0.559317	-5.0286	-1.11219	-5.41879	-3.98679
157	-0.758437	0.000161739	-4.25684	2.97647	-9.62787	-0.649785		157	-1.3042	1.04669	-5.05045	-1.33441	-5.17498	-3.95699
157.1	0.543577	-1.3253	-5.61083	2.03665	-9.47478	-1.77251		157.1	-1.17969	1.56244	-5.07582	-1.41699	-5.06792	-3.76755
157.2	1.71042	-2.12725	-6.72093	0.325593	-8.57931	-3.12652		157.2	-1.07403	2.02026	-5.15116	-1.39854	-5.09264	-3.46884
157.3	2.52139	-2.26276	-7.40328	-1.74843	-6.95154	-4.50586		157.3	-0.977714	2.35726	-5.33453	-1.33043	-5.20189	-3.14679
157.4	2.76295	-1.70299	-7.6092	-3.66557	-4.79595	-5.73329		157.4	-0.90029	2.54911	-5.67119	-1.26367	-5.32319	-2.89386
157.5	2.35547	-0.493446	-7.43385	-4.94136	-2.57284	-6.5835		157.5	-0.858318	2.61183	-6.16719	-1.23961	-5.38282	-2.77612
157.6	1.40865	1.25656	-7.03823	-5.3103	-0.876405	-6.80169		157.6	-0.864372	2.59147	-6.77768	-1.28468	-5.32824	-2.81183
157.7	0.179357	3.32575	-6.58278	-4.84686	-0.174346	-6.21437		157.7	-0.920849	2.54706	-7.41876	-1.40786	-5.14102	-2.9719
157.8	-1.01913	5.34925	-6.21759	-3.89232	-0.601747	-4.86746		157.8	-1.02292	2.53482	-7.99393	-1.60021	-4.83616	-3.19829
157.9	-1.96353	6.90048	-6.11101	-2.84713	-1.93725	-3.10155		157.9	-1.16964	2.59626	-8.42393	-1.83266	-4.45425	-3.42765
158	-2.61954	7.6533	-6.4353	-1.98949	-3.69635	-1.43013		158	-1.37343	2.74888	-8.66903	-2.05674	-4.05229	-3.60626
158.1	-3.09978	7.50655	-7.33682	-1.38018	-5.30501	-0.34265		158.1	-1.65795	2.98567	-8.73372	-2.20671	-3.69412	-3.69517
158.2	-3.51629	6.58357	-8.80981	-0.915634	-6.29579	-0.106581		158.2	-2.043	3.28124	-8.65926	-2.21216	-3.44086	-3.67042
158.3	-3.88773	5.17113	-10.5697	-0.49664	-6.47097	-0.668293		158.3	-2.52449	3.59684	-8.50706	-2.02234	-3.33783	-3.52632
158.4	-4.13176	3.62453	-12.1104	-0.152504	-5.92928	-1.71341		158.4	-3.06497	3.88405	-8.33859	-1.63234	-3.39684	-3.27951
158.5	-4.1105	2.26777	-12.9236	-0.0409338	-4.97183	-2.87677		158.5	-3.60127	4.08939	-8.20126	-1.09239	-3.58245	-2.96997
158.6	-3.76477	1.36455	-12.7265	-0.314992	-3.95347	-3.87659		158.6	-4.06458	4.16325	-8.1219	-0.489819	-3.81646	-2.65486
158.7	-3.25264	1.0447	-11.5669	-0.975147	-3.13533	-4.54888		158.7	-4.40492	4.07123	-8.10565	0.0854446	-4.0007	-2.3967
158.8	-2.92083	1.2692	-9.77751	-1.77273	-2.64146	-4.80896		158.8	-4.60568	3.80345	-8.136	0.571622	-4.04818	-2.24543
158.9	-3.12645	1.89832	-7.82076	-2.22385	-2.49055	-4.63785		158.9	-4.6831	3.38035	-8.17741	0.947879	-3.91155	-2.22296
159	-4.02452	2.76189	-6.13741	-1.84109	-2.64606	-4.08525		159	-4.67349	2.85085	-8.17727	1.22581	-3.59796	-2.31452
159.1	-5.42227	3.66218	-5.02184	-0.438643	-3.04434	-3.28356		159.1	-4.61927	2.28529	-8.07386	1.43109	-3.1641	-2.47205
159.2	-6.83278	4.38911	-4.56975	1.68873	-3.57612	-2.38765		159.2	-4.56006	1.76104	-7.81464	1.59119	-2.69295	-2.62884
159.3	-7.70835	4.74738	-4.70372	3.86878	-4.03171	-1.53946		159.3	-4.52866	1.34285	-7.3767	1.73263	-2.26454	-2.72164
159.4	-7.69696	4.58132	-5.23365	5.39683	-4.15261	-0.857495		159.4	-4.54866	1.0668	-6.77962	1.88294	-1.93112	-2.70798
159.5	-6.80488	3.785	-5.94128	5.88717	-3.73378	-0.478816		159.5	-4.62911	0.933075	-6.08389	2.0691	-1.70654	-2.5762
159.6	-5.3766	2.34824	-6.62689	5.41789	-2.74439	-0.529989		159.6	-4.75608	0.91025	-5.37402	2.31137	-1.57194	-2.34649
159.7	-3.93553	0.460501	-7.13938	4.40686	-1.37363	-1.04804		159.7	-4.88833	0.948901	-4.73368	2.61287	-1.49168	-2.06438
159.8	-2.93644	-1.49493	-7.33435	3.34459	0.0260281	-1.89928		159.8	-4.96212	0.996918	-4.22457	2.94657	-1.43105	-1.78565
159.9	-2.59462	-3.03104	-7.05182	2.57416	1.07982	-2.78451		159.9	-4.90529	1.00991	-3.87221	3.25113	-1.36574	-1.5588
160	-2.88111	-3.74103	-6.16307	2.22517	1.5385	-3.33368		160	-4.6573	0.958638	-3.66347	3.44552	-1.27878	-1.41055
160.1	-3.598	-3.48475	-4.66552	2.25185	1.35384	-3.29111		160.1	-4.18911	0.832435	-3.55591	3.46106	-1.15291	-1.3437
160.2	-4.45046	-2.42505	-2.77321	2.51437	0.696209	-2.64452		160.2	-3.51442	0.638342	-3.49364	3.27439	-0.970807	-1.34251
160.3	-5.13247	-0.908745	-0.899118	2.84967	-0.135657	-1.63626		160.3	-2.68789	0.398982	-3.42315	2.92111	-0.725815	-1.37834
160.4	-5.41118	0.656678	0.500976	3.14345	-0.846997	-0.643909		160.4	-1.79114	0.153209	-3.30473	2.48296	-0.435869	-1.40956
160.5	-5.16894	1.92626	1.10824	3.35276	-1.27708	-0.0130504		160.5	-0.911062	-0.0454074	-3.11653	2.05512	-0.146317	-1.38396
160.6	-4.38094	2.7146	0.834065	3.44921	-1.45995	0.10049		160.6	-0.117779	-0.141135	-2.85219	1.71208	0.0846484	-1.24883
160.7	-3.05849	2.98278	-0.147183	3.33635	-1.53566	-0.22884		160.7	0.548648	-0.0952861	-2.51875	1.48955	0.208479	-0.968656
160.8	-1.20633	2.79054	-1.47329	2.86593	-1.56601	-0.763229		160.8	1.08332	0.0954132	-2.13805	1.38424	0.203987	-0.542809
160.9	1.12642	2.24365	-2.74134	1.95294	-1.43636	-1.25125		160.9	1.51424	0.39158	-1.74905	1.36477	0.0804304	-0.0123957
161	3.76131	1.4478	-3.64514	0.695345	-0.935988	-1.51912		161	1.88951	0.720949	-1.40593	1.38596	-0.130424	0.549267
161.1	6.35417	0.512209	-4.03526	-0.608932	0.0122444	-1.46661		161.1	2.25904	1.00173	-1.16947	1.39962	-0.38705	1.05846
161.2	8.4399	-0.393159	-3.92812	-1.56125	1.19531	-1.00955		161.2	2.65682	1.16709	-1.09261	1.3647	-0.648626	1.44723
161.3	9.58465	-1.02823	-3.42757	-1.8555	2.17798	-0.0948379		161.3	3.08983	1.18269	-1.20322	1.25395	-0.881579	1.68397
161.4	9.55028	-1.16687	-2.64548	-1.42484	2.55279	1.24913		161.4	3.53769	1.05361	-1.48974	1.05551	-1.06233	1.78223
161.5	8.39281	-0.715497	-1.66591	-0.438277	2.13116	2.86371		161.5	3.96027	0.816987	-1.89769	0.773552	-1.1755	1.79152
161.6	6.49486	0.210852	-0.579872	0.783891	1.00345	4.45488		161.6	4.30682	0.526147	-2.34434	0.429962	-1.20988	1.77461
161.7	4.44455	1.29381	0.449924	1.8941	-0.561962	5.68335		161.7	4.52187	0.233511	-2.74501	0.0659947	-1.16122	1.78149
161.8	2.78144	2.11451	1.16752	2.61204	-2.23069	6.25716		161.8	4.55069	-0.0222081	-3.03936	-0.261496	-1.0428	1.83305
161.9	1.83171	2.34816	1.24653	2.7466	-3.66642	6.01171		161.9	4.34859	-0.220068	-3.20723	-0.490996	-0.895116	1.9205
162	1.62976	1.90239	0.407594	2.25602	-4.58246	4.9729		162	3.8967	-0.354241	-3.27009	-0.57089	-0.781929	2.01451
162.1	1.94995	0.921897	-1.37945	1.26079	-4.8072	3.38057		162.1	3.22064	-0.429525	-3.27824	-0.476992	-0.770262	2.07633
162.2	2.44466	-0.267988	-3.76256	-0.0206725	-4.34976	1.6574		162.2	2.39789	-0.461417	-3.29372	-0.224314	-0.901924	2.06629
162.3	2.80298	-1.30806	-6.10115	-1.34415	-3.38391	0.258396		162.3	1.54382	-0.479174	-3.37541	0.13436	-1.17448	1.94814
162.4	2.83287	-1.96152	-7.74015	-2.50469	-2.1202	-0.516174		162.4	0.779512	-0.525711	-3.56654	0.521424	-1.5402	1.69375
162.5	2.44941	-2.18426	-8.28483	-3.32151	-0.738776	-0.646374		162.5	0.192473	-0.647175	-3.88399	0.855598	-1.92232	1.28973
162.6	1.61639	-2.10358	-7.74527	-3.6144	0.576795	-0.374623		162.6	-0.189759	-0.872017	-4.31243	1.07514	-2.23783	0.744785
162.7	0.325562	-1.91581	-6.49879	-3.20616	1.57469	-0.0325338		162.7	-0.39865	-1.19305	-4.80433	1.15597	-2.42275	0.0939106
162.8	-1.32788	-1.76874	-5.10392	-1.96712	1.93642	0.131576		162.8	-0.501779	-1.56616	-5.28567	1.12026	-2.45221	-0.604693
162.9	-3.05314	-1.67297	-4.06672	0.0350243	1.39366	0.0414061		162.9	-0.570779	-1.92612	-5.6691	1.02684	-2.34774	-1.28079
163	-4.4021	-1.5704	-3.69074	2.44003	-0.0602865	-0.265489		163	-0.655571	-2.2108	-5.877	0.948216	-2.16812	-1.8687
163.1	-4.96884	-1.46875	-4.03415	4.67261	-2.08062	-0.759463		163.1	-0.777861	-2.38333	-5.86914	0.947019	-1.98566	-2.32418
163.2	-4.60048	-1.50661	-4.91521	6.14181	-4.0862	-1.46101		163.2	-0.938665	-2.4423	-5.66295	1.06136	-1.86216	-2.63583
163.3	-3.4848	-1.85405	-5.97642	6.46484	-5.4925	-2.41338		163.3	-1.12682	-2.41719	-5.33208	1.30292	-1.83605	-2.82858
163.4	-2.05339	-2.52849	-6.83353	5.62629	-5.92569	-3.58073		163.4	-1.32113	-2.35272	-4.9816	1.65909	-1.91913	-2.95159
163.5	-0.769712	-3.34304	-7.19485	3.98617	-5.37431	-4.8077		163.5	-1.48755	-2.28995	-4.71208	2.09384	-2.09798	-3.05498
163.6	0.0785293	-3.99466	-6.93632	2.13948	-4.16722	-5.86455		163.6	-1.57857	-2.25489	-4.58998	2.54713	-2.3348	-3.1705
163.7	0.45675	-4.21696	-6.11069	0.667912	-2.80639	-6.52077		163.7	-1.54445	-2.25733	-4.63289	2.93813	-2.56719	-3.30496
163.8	0.508494	-3.91775	-4.91374	-0.0757766	-1.75378	-6.61385		163.8	-1.35593	-2.29687	-4.81209	3.18186	-2.71604	-3.44725
163.9	0.365721	-3.20089	-3.62895	-0.041024	-1.24796	-6.08574		163.9	-1.02448	-2.36677	-5.06576	3.21375	-2.70558	-3.57869
164	0.0693013	-2.31066	-2.59589	0.59969	-1.28431	-5.03963		164	-0.60485	-2.45222	-5.31919	3.01287	-2.48819	-3.67792
164.1	-0.365777	-1.53463	-2.11527	1.60173	-1.67641	-3.79296		164.1	-0.17844	-2.52675	-5.50669	2.61555	-2.06398	-3.72105
164.2	-0.853884	-1.0882	-2.32669	2.73341	-2.15108	-2.73764		164.2	0.173782	-2.55337	-5.58929	2.10982	-1.48465	-3.67908
164.3	-1.21268	-1.03655	-3.1635	3.77637	-2.46362	-2.13225		164.3	0.395349	-2.49534	-5.5586	1.60971	-0.838493	-3.51828
164.4	-1.22173	-1.31979	-4.42308	4.49975	-2.45123	-1.99637		164.4	0.466524	-2.3307	-5.42988	1.22033	-0.222047	-3.20887
164.5	-0.747876	-1.81018	-5.83333	4.67998	-2.01429	-2.15424		164.5	0.400804	-2.06539	-5.2311	1.00504	0.287135	-2.73797
164.6	0.151586	-2.34518	-7.11325	4.1784	-1.13685	-2.37754		164.6	0.231184	-1.73809	-4.99719	0.968927	0.646942	-2.12226
164.7	1.23262	-2.75869	-8.00301	2.98219	0.117533	-2.49984		164.7	-0.00175846	-1.4113	-4.76894	1.06528	0.854576	-1.41196
164.8	2.16488	-2.92134	-8.34246	1.25752	1.61506	-2.44652		164.8	-0.25294	-1.15006	-4.58831	1.21708	0.937823	-0.679967
164.9	2.64849	-2.77369	-8.10273	-0.612642	3.12537	-2.1942		164.9	-0.474521	-0.998569	-4.48544	1.34384	0.942709	0.000703252
165	2.50297	-2.30657	-7.38065	-2.13247	4.35607	-1.69982		165	-0.623088	-0.963982	-4.46532	1.38114	0.919498	0.583765
165.1	1.71325	-1.5421	-6.31175	-2.87565	5.05903	-0.847232		165.1	-0.670771	-1.01488	-4.50247	1.29156	0.909071	1.06313
165.2	0.440263	-0.544096	-5.00661	-2.63334	5.10528	0.452308		165.2	-0.616444	-1.09467	-4.54708	1.06784	0.93386	1.46532
165.3	-1.0387	0.515598	-3.5571	-1.52032	4.48887	2.14078		165.3	-0.491701	-1.14194	-4.53917	0.731376	0.996773	1.82807
165.4	-2.42679	1.34717	-2.13421	0.0539356	3.31033	3.94623		165.4	-0.355527	-1.10924	-4.42619	0.326694	1.08351	2.18195
165.5	-3.45153	1.63769	-1.03351	1.56215	1.776	5.46139		165.5	-0.277516	-0.976198	-4.17606	-0.089069	1.169	2.54366
165.6	-3.90437	1.24018	-0.558286	2.53958	0.167235	6.35806		165.6	-0.317887	-0.751076	-3.78584	-0.454602	1.2234	2.9193
165.7	-3.69757	0.264702	-0.846992	2.7547	-1.20125	6.53178		165.7	-0.511569	-0.461558	-3.28271	-0.712023	1.21544	3.30851
165.8	-2.89142	-0.946659	-1.77338	2.23582	-2.071	6.11909		165.8	-0.855996	-0.141671	-2.71728	-0.817638	1.11727	3.70555
165.9	-1.66449	-1.95352	-2.95812	1.21061	-2.32833	5.41155		165.9	-1.30729	0.175405	-2.14987	-0.757114	0.909872	4.09517
166	-0.289131	-2.39295	-3.92191	-0.0270015	-2.04222	4.70497		166	-1.78892	0.457034	-1.64092	-0.558012	0.587198	4.44656
166.1	0.898907	-2.12328	-4.28858	-1.22006	-1.38171	4.17048		166.1	-2.21326	0.670708	-1.24596	-0.290275	0.159558	4.7153
166.2	1.56708	-1.25443	-3.9127	-2.19962	-0.53974	3.86165		166.2	-2.50918	0.790566	-1.00781	-0.0455462	-0.343578	4.85215
166.3	1.47778	-0.0834024	-2.86101	-2.88957	0.316536	3.77151		166.3	-2.64363	0.809078	-0.942379	0.0946563	-0.876261	4.81668
166.4	0.546315	1.0684	-1.36931	-3.23187	1.04219	3.886		166.4	-2.62924	0.746719	-1.0264	0.0864285	-1.38841	4.59066
166.5	-1.12771	2.00046	0.210805	-3.11864	1.47979	4.17017		166.5	-2.51554	0.648687	-1.19811	-0.063231	-1.84162	4.18833
166.6	-3.20678	2.66439	1.50958	-2.4081	1.45653	4.55546		166.6	-2.3714	0.569237	-1.37184	-0.304856	-2.22136	3.65889
166.7	-5.16901	3.08372	2.26538	-1.10356	0.830291	4.92371		166.7	-2.26568	0.550104	-1.46046	-0.56727	-2.53902	3.07507
166.8	-6.4744	3.2456	2.34024	0.509083	-0.426433	5.12639		166.8	-2.25255	0.60487	-1.40014	-0.781878	-2.82634	2.509
166.9	-6.77365	3.08835	1.70783	1.9182	-2.1646	5.02082		166.9	-2.35937	0.716593	-1.16846	-0.899338	-3.12661	2.00873
167	-6.06927	2.5532	0.491421	2.64007	-4.06443	4.46733		167	-2.57892	0.847155	-0.790912	-0.895746	-3.48768	1.58817
167.1	-4.71246	1.66187	-1.0219	2.43738	-5.74528	3.34321		167.1	-2.87195	0.951349	-0.335474	-0.772219	-3.95373	1.23166
167.2	-3.20691	0.577587	-2.46189	1.42228	-6.93051	1.61903		167.2	-3.17888	0.992997	0.103076	-0.551619	-4.55707	0.907799
167.3	-1.97148	-0.42637	-3.47725	-0.00462816	-7.53728	-0.481515		167.3	-3.43093	0.953482	0.427565	-0.274767	-5.30999	0.584428
167.4	-1.24715	-1.08594	-3.80047	-1.35292	-7.65695	-2.46876		167.4	-3.56053	0.828304	0.565245	0.000106598	-6.19801	0.239052
167.5	-1.09418	-1.27193	-3.27996	-2.22522	-7.47118	-3.80578		167.5	-3.51834	0.617817	0.488409	0.199314	-7.17543	-0.13688
167.6	-1.44126	-1.02249	-1.93256	-2.43774	-7.21284	-4.21165		167.6	-3.29163	0.323777	0.219709	0.247295	-8.16755	-0.537729
167.7	-2.10507	-0.493664	0.0165335	-2.02382	-7.14671	-3.79962		167.7	-2.91493	-0.0450962	-0.175619	0.0915881	-9.08283	-0.945741
167.8	-2.83343	0.0962758	2.12977	-1.15899	-7.51985	-2.97912		167.8	-2.46323	-0.463828	-0.609487	-0.274045	-9.83351	-1.33735
167.9	-3.41451	0.516879	3.82975	-0.0996729	-8.46272	-2.19905		167.9	-2.02803	-0.885653	-0.996964	-0.802033	-10.361	-1.68592
168	-3.73991	0.624611	4.59435	0.860645	-9.94014	-1.73406		168	-1.68649	-1.24988	-1.2786	-1.40337	-10.6557	-1.95738
168.1	-3.73866	0.396635	4.147	1.47461	-11.7575	-1.61129		168.1	-1.48169	-1.50119	-1.43331	-1.97729	-10.7595	-2.10763
168.2	-3.33088	-0.127555	2.55136	1.55421	-13.6166	-1.70122		168.2	-1.42058	-1.61048	-1.47982	-2.44583	-10.7496	-2.095
168.3	-2.48948	-0.913897	0.203366	0.978423	-15.1596	-1.83539		168.3	-1.48102	-1.58557	-1.4689	-2.77717	-10.7106	-1.90262
168.4	-1.31498	-1.91496	-2.30253	-0.287872	-16.0357	-1.89072		168.4	-1.62271	-1.46712	-1.47176	-2.98958	-10.7096	-1.55391
168.5	-0.070525	-3.02524	-4.38033	-2.13794	-15.9863	-1.80982		168.5	-1.79594	-1.31531	-1.56747	-3.13692	-10.781	-1.10797
168.6	0.905189	-4.03009	-5.66792	-4.29756	-14.9261	-1.6366		168.6	-1.95068	-1.19242	-1.82878	-3.28418	-10.9217	-0.637921
168.7	1.32917	-4.61783	-6.09569	-6.33574	-13.0321	-1.45838		168.7	-2.04705	-1.14577	-2.30362	-3.48584	-11.0976	-0.205674
168.8	1.0937	-4.53006	-5.80978	-7.78531	-10.7545	-1.27146		168.8	-2.06402	-1.19577	-2.99566	-3.7717	-11.2568	0.15481
168.9	0.274693	-3.69455	-5.09191	-8.33442	-8.6958	-0.935235		168.9	-2.003	-1.33507	-3.85377	-4.14287	-11.3446	0.43977
169	-0.932617	-2.28439	-4.26797	-7.96986	-7.36804	-0.266781		169	-1.88757	-1.53625	-4.77702	-4.57864	-11.316	0.667281
169.1	-2.27453	-0.662455	-3.61478	-6.9856	-6.99406	0.801566		169.1	-1.7601	-1.76029	-5.63763	-5.04508	-11.144	0.865961
169.2	-3.5029	0.741823	-3.32858	-5.83613	-7.4555	2.12229		169.2	-1.67353	-1.96203	-6.31685	-5.49952	-10.8248	1.06438
169.3	-4.38631	1.55812	-3.55956	-4.94261	-8.4257	3.36948		169.3	-1.67837	-2.09746	-6.74007	-5.89182	-10.3822	1.28495
169.4	-4.73565	1.5955	-4.42579	-4.52719	-9.5387	4.19112		169.4	-1.80872	-2.13232	-6.89652	-6.16911	-9.8709	1.54003
169.5	-4.47158	0.889337	-5.94254	-4.58721	-10.5104	4.36909		169.5	-2.07297	-2.05258	-6.83449	-6.28767	-9.37557	1.83103
169.6	-3.70308	-0.333093	-7.93485	-4.95932	-11.1692	3.92917		169.6	-2.44993	-1.87203	-6.63795	-6.23139	-8.99563	2.14851
169.7	-2.70254	-1.74356	-9.99351	-5.44925	-11.4324	3.11026		169.7	-2.89368	-1.63064	-6.39854	-6.02604	-8.81849	2.47013
169.8	-1.77636	-3.02339	-11.5483	-5.93358	-11.272	2.25638		169.8	-3.34414	-1.38544	-6.19123	-5.73761	-8.88771	2.75873
169.9	-1.16384	-3.93615	-12.079	-6.37511	-10.6917	1.67635		169.9	-3.74016	-1.1971	-6.06101	-5.45248	-9.18576	2.96401
170	-1.01781	-4.34351	-11.3433	-6.74714	-9.7339	1.53778		170	-4.03295	-1.11758	-6.02383	-5.24708	-9.64082	3.0314
170.1	-1.39733	-4.21725	-9.49728	-6.95697	-8.51021	1.8589		170.1	-4.19822	-1.18009	-6.07376	-5.16623	-10.1537	2.91786
170.2	-2.28644	-3.6179	-7.04011	-6.85183	-7.29493	2.52649		170.2	-4.24352	-1.39042	-6.18515	-5.21685	-10.6272	2.60989
170.3	-3.58702	-2.67452	-4.61328	-6.31305	-6.50548	3.31051		170.3	-4.2073	-1.72309	-6.30944	-5.37664	-10.9878	2.13489
170.4	-5.07926	-1.54848	-2.75457	-5.37901	-6.57314	3.93879		170.4	-4.14758	-2.12614	-6.37681	-5.60768	-11.195	1.55896
170.5	-6.45005	-0.426424	-1.73983	-4.29435	-7.74316	4.19611		170.5	-4.12194	-2.53449	-6.3098	-5.86836	-11.2432	0.965031
170.6	-7.3831	0.473906	-1.5677	-3.43124	-9.87256	3.97083		170.6	-4.16921	-2.88584	-6.04802	-6.11985	-11.1586	0.424276
170.7	-7.66489	0.917288	-2.05422	-3.12257	-12.4349	3.22307		170.7	-4.30238	-3.13394	-5.57481	-6.32759	-10.991	-0.0242608
170.8	-7.25198	0.689503	-2.98273	-3.49374	-14.7299	1.94721		170.8	-4.51198	-3.25734	-4.9286	-6.46247	-10.8014	-0.37911
170.9	-6.31243	-0.320861	-4.17731	-4.46183	-16.1738	0.192064		170.9	-4.77264	-3.26312	-4.19233	-6.50479	-10.6496	-0.668677
171	-5.15648	-2.01754	-5.45321	-5.80306	-16.4761	-1.86596		171	-5.04667	-3.18274	-3.46553	-6.45065	-10.5841	-0.938387
171.1	-4.11984	-4.05987	-6.53875	-7.24367	-15.6679	-3.88397		171.1	-5.28406	-3.06131	-2.83347	-6.31708	-10.6252	-1.23249
171.2	-3.45643	-5.96245	-7.08772	-8.51478	-14.0329	-5.42173		171.2	-5.4255	-2.94457	-2.3477	-6.14257	-10.7503	-1.57589
171.3	-3.26714	-7.27514	-6.79579	-9.39101	-11.9902	-6.16756		171.3	-5.41483	-2.86906	-2.02156	-5.97916	-10.8873	-1.96532
171.4	-3.50617	-7.71651	-5.54322	-9.72451	-9.99396	-6.08258		171.4	-5.21724	-2.85754	-1.83538	-5.87608	-10.9269	-2.37375
171.5	-4.04029	-7.24104	-3.5037	-9.46523	-8.42252	-5.36874		171.5	-4.83584	-2.91499	-1.74588	-5.85993	-10.7567	-2.76264
171.6	-4.72697	-6.03403	-1.09348	-8.66792	-7.46772	-4.35609		171.6	-4.31749	-3.02545	-1.69543	-5.92023	-10.3038	-3.09064
171.7	-5.44914	-4.44166	1.17322	-7.46672	-7.15421	-3.38485		171.7	-3.74194	-3.15054	-1.62144	-6.01183	-9.56622	-3.31634
171.8	-6.05568	-2.85084	2.85841	-6.03656	-7.39646	-2.72617		171.8	-3.1962	-3.23258	-1.46724	-6.0715	-8.61813	-3.40033
171.9	-6.3222	-1.55358	3.70494	-4.58113	-7.99425	-2.47331		171.9	-2.74535	-3.20498	-1.19689	-6.03806	-7.58625	-3.31299
172	-5.99144	-0.689959	3.64468	-3.34636	-8.63114	-2.52726		172	-2.41396	-3.01353	-0.810007	-5.87094	-6.6111	-3.04827
172.1	-4.8979	-0.26478	2.78987	-2.60098	-8.90233	-2.68143		172.1	-2.18375	-2.63858	-0.348738	-5.56323	-5.80996	-2.63299
172.2	-3.09095	-0.230624	1.42524	-2.54207	-8.4172	-2.7473		172.2	-2.00551	-2.1073	0.107154	-5.1427	-5.25467	-2.12247
172.3	-0.899334	-0.502656	-0.0461891	-3.15663	-6.97914	-2.64027		172.3	-1.81858	-1.48864	0.456412	-4.66359	-4.96385	-1.58615
172.4	1.14702	-0.960688	-1.19662	-4.14775	-4.73418	-2.35297		172.4	-1.56989	-0.874078	0.602906	-4.19324	-4.90692	-1.09244
172.5	2.5324	-1.43688	-1.72477	-5.05097	-2.1917	-1.88957		172.5	-1.22596	-0.350273	0.481338	-3.79945	-5.01841	-0.693061
172.6	2.9652	-1.71561	-1.55602	-5.47619	-0.0563576	-1.23579		172.6	-0.775926	0.0271383	0.0757305	-3.54019	-5.21349	-0.408517
172.7	2.50782	-1.54827	-0.857217	-5.23452	1.06594	-0.381295		172.7	-0.230993	0.248144	-0.575302	-3.45566	-5.40388	-0.221753
172.8	1.51393	-0.805288	0.0382597	-4.40266	0.909597	0.616373		172.8	0.37567	0.344487	-1.38779	-3.55772	-5.51732	-0.0885302
172.9	0.457047	0.411724	0.753858	-3.2837	-0.413431	1.63793		172.9	0.988519	0.37296	-2.25143	-3.824	-5.5172	0.0399288
173	-0.237075	1.75661	0.954369	-2.24193	-2.55039	2.51133		173	1.53457	0.393532	-3.05571	-4.19944	-5.41599	0.197243
173.1	-0.328235	2.80063	0.394154	-1.57972	-5.05002	3.03492		173.1	1.93606	0.453842	-3.71991	-4.60395	-5.27518	0.393882
173.2	0.187343	3.20658	-1.01331	-1.46933	-7.45458	3.02421		173.2	2.13135	0.579405	-4.2149	-4.95037	-5.18908	0.621732
173.3	1.11982	2.87065	-3.16013	-1.97341	-9.3631	2.43343		173.3	2.0952	0.770763	-4.56559	-5.16954	-5.25557	0.862322
173.4	2.20147	1.97434	-5.72211	-3.05931	-10.4706	1.45239		173.4	1.84953	1.00608	-4.83351	-5.23224	-5.54236	1.09425
173.5	3.20819	0.906261	-8.20915	-4.59951	-10.6332	0.448813		173.5	1.45966	1.24591	-5.08812	-5.15567	-6.06081	1.29572
173.6	3.99107	0.084253	-10.1074	-6.31614	-9.92268	-0.208523		173.6	1.01581	1.43614	-5.38064	-4.99579	-6.75812	1.44099
173.7	4.42699	-0.205915	-11.0372	-7.87318	-8.62908	-0.343462		173.7	0.604694	1.51736	-5.72991	-4.82653	-7.53337	1.49964
173.8	4.3849	0.0849367	-10.8829	-8.98353	-7.18179	-0.00709555		173.8	0.284314	1.44102	-6.12342	-4.71444	-8.26665	1.43793
173.9	3.73451	0.794651	-9.86609	-9.41872	-6.0234	0.595576		173.9	0.0715777	1.1918	-6.52759	-4.70045	-8.84738	1.22946
174	2.42058	1.63191	-8.46102	-9.04563	-5.51546	1.23318		174	-0.0532389	0.799888	-6.89651	-4.79007	-9.19721	0.873707
174.1	0.532489	2.29239	-7.15833	-7.87379	-5.86449	1.73707		174.1	-0.130885	0.335299	-7.17912	-4.9541	-9.28675	0.409144
174.2	-1.64409	2.56348	-6.2795	-6.11682	-7.06714	2.05316		174.2	-0.20451	-0.114948	-7.326	-5.13898	-9.1391	-0.0936468
174.3	-3.6626	2.36152	-5.88441	-4.17453	-8.86994	2.18929		174.3	-0.306802	-0.476614	-7.29813	-5.28277	-8.82083	-0.55661
174.4	-5.03759	1.68569	-5.82998	-2.51652	-10.7884	2.0883		174.4	-0.45726	-0.712706	-7.0777	-5.33174	-8.42396	-0.92
174.5	-5.47501	0.575459	-5.89944	-1.52523	-12.2695	1.61333		174.5	-0.666677	-0.831812	-6.67788	-5.25671	-8.04377	-1.15458
174.6	-4.98942	-0.886177	-5.93566	-1.37814	-12.8793	0.588973		174.6	-0.937896	-0.880358	-6.14818	-5.05736	-7.75521	-1.25955
174.7	-3.85359	-2.48013	-5.91664	-2.00414	-12.4227	-1.03279		174.7	-1.25831	-0.924567	-5.56688	-4.75566	-7.59866	-1.2548
174.8	-2.45012	-3.86181	-5.87742	-3.10318	-10.9972	-3.01283		174.8	-1.59047	-1.0285	-5.01825	-4.38843	-7.57571	-1.17248
174.9	-1.13264	-4.69144	-5.81773	-4.25795	-8.97669	-4.87336		174.9	-1.87012	-1.23381	-4.56557	-4.00189	-7.65011	-1.05154
175	-0.1318	-4.78356	-5.65706	-5.11627	-6.853	-6.11402		175	-2.01886	-1.54788	-4.23559	-3.64891	-7.75323	-0.930487
175.1	0.4625	-4.17398	-5.24838	-5.50373	-5.06	-6.41797		175.1	-1.97089	-1.94365	-4.01868	-3.38509	-7.79553	-0.84006
175.2	0.650404	-3.1073	-4.46177	-5.43203	-3.88652	-5.72882		175.2	-1.70174	-2.36996	-3.88196	-3.25993	-7.68716	-0.797331
175.3	0.43098	-1.94055	-3.31047	-5.04073	-3.45938	-4.1964		175.3	-1.24645	-2.76446	-3.78403	-3.30297	-7.36614	-0.797024
175.4	-0.183731	-1.0312	-2.03222	-4.48425	-3.72357	-2.12791		175.4	-0.691723	-3.06494	-3.68554	-3.50982	-6.82115	-0.807799
175.5	-1.06211	-0.666626	-1.00084	-3.85463	-4.52047	0.0736766		175.5	-0.146619	-3.21909	-3.55398	-3.83691	-6.09943	-0.773844
175.6	-1.91217	-0.972265	-0.539408	-3.17581	-5.63328	1.99496		175.6	0.290423	-3.1973	-3.36485	-4.21088	-5.29529	-0.626669
175.7	-2.33353	-1.85835	-0.765376	-2.47443	-6.78021	3.28916		175.7	0.555068	-3.00294	-3.10562	-4.55164	-4.52023	-0.306961
175.8	-1.99618	-3.04683	-1.54881	-1.87309	-7.61744	3.79498		175.8	0.625065	-2.6772	-2.78083	-4.79546	-3.86703	0.213161
175.9	-0.828491	-4.16452	-2.59199	-1.63195	-7.78624	3.59041		175.9	0.516852	-2.29302	-2.41538	-4.9069	-3.38783	0.917338
176	0.912982	-4.88584	-3.5601	-2.04675	-7.0277	2.91569		176	0.275615	-1.93779	-2.05475	-4.87811	-3.08877	1.74437
176.1	2.70227	-5.0208	-4.16523	-3.24814	-5.33115	2.09351		176.1	-0.0384309	-1.68902	-1.75889	-4.72029	-2.93426	2.60024
176.2	3.95535	-4.53256	-4.22503	-5.04166	-3.00468	1.43015		176.2	-0.359703	-1.59263	-1.58682	-4.45402	-2.85698	3.37891
176.3	4.27734	-3.50677	-3.69926	-6.93882	-0.610067	1.16621		176.3	-0.624696	-1.65221	-1.5736	-4.10559	-2.77379	3.99007
176.4	3.57613	-2.10977	-2.70139	-8.36152	1.24778	1.46919		176.4	-0.782776	-1.82991	-1.71069	-3.7078	-2.60354	4.38461
176.5	2.04885	-0.557671	-1.47041	-8.89605	2.17872	2.4222		176.5	-0.807295	-2.06013	-1.94438	-3.30209	-2.28504	4.56717
176.6	0.057316	0.846205	-0.296343	-8.40301	2.12769	3.96872		176.6	-0.70578	-2.27277	-2.19302	-2.93347	-1.79037	4.59204
176.7	-1.97142	1.74742	0.555621	-7.01071	1.29338	5.85698		176.7	-0.521289	-2.41546	-2.37377	-2.63591	-1.12947	4.54355
176.8	-3.63853	1.86505	0.88231	-5.01437	0.024068	7.6416		176.8	-0.32107	-2.46582	-2.4269	-2.41428	-0.34823	4.50812
176.9	-4.68837	1.1217	0.567827	-2.74902	-1.25987	8.82097		176.9	-0.175844	-2.42981	-2.32798	-2.23465	0.477586	4.54999
177	-5.03065	-0.301893	-0.385378	-0.514133	-2.14563	9.04101		177	-0.133877	-2.3306	-2.08821	-2.03271	1.25795	4.69459
177.1	-4.68861	-2.04411	-1.80734	1.43908	-2.30934	8.26177		177.1	-0.202076	-2.19775	-1.74927	-1.73905	1.90958	4.92464
177.2	-3.74946	-3.68749	-3.33146	2.90773	-1.62629	6.78088		177.2	-0.344259	-2.06321	-1.37198	-1.3114	2.3761	5.18967
177.3	-2.32901	-4.88605	-4.51214	3.72132	-0.218683	5.09837		177.3	-0.493141	-1.96252	-1.01997	-0.756227	2.63885	5.42363
177.4	-0.607759	-5.47311	-4.99224	3.79213	1.62917	3.7121		177.4	-0.571013	-1.93581	-0.74306	-0.128318	2.71561	5.56282
177.5	1.14015	-5.47257	-4.62153	3.18532	3.61783	2.97051		177.5	-0.511595	-2.01952	-0.566359	0.489297	2.6508	5.55708
177.6	2.57523	-5.02064	-3.49527	2.13588	5.49487	2.98813		177.6	-0.276918	-2.22932	-0.488007	1.01347	2.50592	5.37428
177.7	3.38183	-4.2737	-1.87836	1.00697	7.01118	3.62755		177.7	0.133788	-2.54475	-0.484399	1.38319	2.34612	5.00341
177.8	3.4157	-3.3343	-0.0892191	0.184825	7.93509	4.55163		177.8	0.686352	-2.90669	-0.516304	1.56896	2.22375	4.46101
177.9	2.79596	-2.27404	1.53705	-0.0495423	8.07306	5.34111		177.9	1.32172	-3.2339	-0.533009	1.57248	2.1649	3.79592
178	1.86024	-1.21964	2.71452	0.33136	7.32064	5.67165		178	1.97048	-3.44965	-0.478912	1.42198	2.16352	3.08404
178.1	1.04513	-0.39808	3.28287	1.07638	5.71456	5.44655		178.1	2.56656	-3.50657	-0.306307	1.16535	2.18588	2.41024
178.2	0.725023	-0.103512	3.23705	1.77839	3.48359	4.7884		178.2	3.0583	-3.39994	0.00766832	0.86315	2.18425	1.84527
178.3	1.06743	-0.57682	2.70757	2.09645	1.02594	3.87118		178.3	3.41906	-3.16452	0.45057	0.579128	2.11145	1.42567
178.4	2.01808	-1.81928	1.88761	1.90019	-1.16959	2.74932		178.4	3.65341	-2.86003	0.975798	0.367548	1.92844	1.14383
178.5	3.34347	-3.49721	0.943638	1.27091	-2.69239	1.33686		178.5	3.79553	-2.5529	1.51473	0.260504	1.60857	0.951355
178.6	4.70522	-5.03121	0.0254517	0.409097	-3.3402	-0.399948		178.6	3.90057	-2.30033	1.99411	0.258543	1.14348	0.777357
178.7	5.77064	-5.86456	-0.669364	-0.454375	-3.14606	-2.26539		178.7	4.03173	-2.13906	2.35091	0.327509	0.547416	0.555152
178.8	6.3403	-5.71183	-0.887681	-1.11933	-2.33282	-3.84026		178.8	4.24691	-2.07849	2.54778	0.405916	-0.138665	0.246722
178.9	6.38394	-4.65509	-0.397186	-1.45494	-1.24621	-4.67361		178.9	4.58334	-2.09872	2.58417	0.423935	-0.846446	-0.147711
179	6.03045	-3.07335	0.825447	-1.41616	-0.246419	-4.50623		179	5.04274	-2.15645	2.49713	0.325359	-1.48749	-0.598565
179.1	5.52524	-1.47105	2.53709	-1.03624	0.391584	-3.42099		179.1	5.58471	-2.19269	2.35039	0.0828214	-1.97067	-1.06463
179.2	5.12411	-0.296177	4.30734	-0.411546	0.50669	-1.82078		179.2	6.13485	-2.13946	2.215	-0.298682	-2.22695	-1.50452
179.3	4.99132	0.20051	5.66659	0.316132	0.0570737	-0.284017		179.3	6.60643	-1.93193	2.15065	-0.787461	-2.23388	-1.87683
179.4	5.1675	0.0200699	6.27109	0.973626	-0.895323	0.669582		179.4	6.92886	-1.52837	2.19307	-1.33351	-2.02642	-2.13496
179.5	5.64535	-0.592738	5.97638	1.35726	-2.19806	0.774157		179.5	7.07272	-0.926654	2.34634	-1.87891	-1.68708	-2.23174
179.6	6.45405	-1.24432	4.8838	1.28337	-3.59032	0.0977973		179.6	7.06037	-0.167627	2.58013	-2.3709	-1.31904	-2.13607
179.7	7.57955	-1.56358	3.33315	0.637683	-4.71163	-1.03372		179.7	6.95622	0.675326	2.83224	-2.77431	-1.01411	-1.85177
179.8	8.85499	-1.37947	1.80316	-0.599413	-5.18316	-2.21797		179.8	6.8422	1.51564	3.01749	-3.0778	-0.827507	-1.42842
179.9	9.93852	-0.719583	0.742498	-2.34476	-4.73047	-3.13464		179.9	6.78805	2.27584	3.04976	-3.29272	-0.768225	-0.956099
180	10.4198	0.328073	0.405965	-4.38911	-3.33092	-3.60703		180	6.82936	2.90424	2.86863	-3.44726	-0.80412	-0.540251
180.1	10.0349	1.70863	0.793652	-6.40904	-1.2874	-3.57998		180.1	6.96249	3.38361	2.46077	-3.57842	-0.878134	-0.267928
180.2	8.82478	3.36345	1.66473	-8.01193	0.834564	-3.05132		180.2	7.15589	3.72976	1.86525	-3.72519	-0.928162	-0.180736
180.3	7.15087	5.1979	2.63109	-8.86275	2.42849	-2.04524		180.3	7.36675	3.98148	1.16112	-3.92016	-0.904735	-0.267337
180.4	5.56063	7.0389	3.30513	-8.81819	3.11061	-0.638886		180.4	7.55213	4.18502	0.44556	-4.17906	-0.782363	-0.472913
180.5	4.56984	8.61838	3.3981	-7.97733	2.85112	0.992698		180.5	7.66925	4.37882	-0.191382	-4.49053	-0.565451	-0.720473
180.6	4.44552	9.63017	2.75216	-6.61422	1.92596	2.52346		180.6	7.67588	4.58376	-0.689739	-4.81133	-0.287874	-0.93466
180.7	5.10998	9.85011	1.37405	-5.06975	0.761387	3.52318		180.7	7.53808	4.8053	-1.03446	-5.07106	-0.00697805	-1.06033
180.8	6.22752	9.21185	-0.542096	-3.66342	-0.218637	3.64842		180.8	7.24285	5.03914	-1.25562	-5.18889	0.206261	-1.07099
180.9	7.3873	7.85307	-2.6263	-2.64137	-0.751542	2.80871		180.9	6.81004	5.2692	-1.4134	-5.09935	0.280099	-0.968537
181	8.27917	6.085	-4.45732	-2.17885	-0.7934	1.19826		181	6.29504	5.46295	-1.57607	-4.77728	0.160677	-0.777502
181.1	8.75202	4.29929	-5.6991	-2.34093	-0.497066	-0.802633		181.1	5.77789	5.57129	-1.79809	-4.25294	-0.167117	-0.538325
181.2	8.79675	2.86744	-6.18814	-3.04395	-0.117747	-2.72065		181.2	5.33857	5.53563	-2.10511	-3.60768	-0.66898	-0.303513
181.3	8.44512	2.05026	-5.94422	-4.01165	0.0971906	-4.11072		181.3	5.03	5.30013	-2.48959	-2.95083	-1.27076	-0.134288
181.4	7.69238	1.92045	-5.13892	-4.81597	0.00718288	-4.67489		181.4	4.86121	4.83041	-2.91434	-2.38695	-1.88294	-0.0914162
181.5	6.51228	2.38681	-4.05703	-5.01485	-0.407933	-4.3544		181.5	4.80083	4.13454	-3.32338	-1.98662	-2.42805	-0.214377
181.6	4.91958	3.25561	-3.01724	-4.34786	-1.10541	-3.31577		181.6	4.79646	3.27359	-3.65492	-1.77228	-2.85952	-0.499058
181.7	3.06208	4.23914	-2.27641	-2.86697	-2.07568	-1.86537		181.7	4.79671	2.35431	-3.85332	-1.719	-3.17042	-0.892577
181.8	1.27982	5.0023	-1.97159	-0.933848	-3.31758	-0.332386		181.8	4.7655	1.50396	-3.8787	-1.76585	-3.38677	-1.30819
181.9	0.0332258	5.20523	-2.10964	0.90195	-4.73793	1.01469		181.9	4.68532	0.836306	-3.71143	-1.83299	-3.55031	-1.65157
182	-0.317492	4.59177	-2.58832	2.1066	-6.10319	1.94656		182	4.55272	0.422518	-3.35643	-1.84376	-3.69958	-1.84823
182.1	0.314909	3.03538	-3.23104	2.34823	-7.11966	2.23794		182.1	4.37211	0.275815	-2.84739	-1.74445	-3.85778	-1.86637
182.2	1.70033	0.633118	-3.82269	1.60865	-7.55596	1.72153		182.2	4.15375	0.354421	-2.24639	-1.5184	-4.03204	-1.72522
182.3	3.41921	-2.1996	-4.20149	0.191463	-7.3408	0.433134		182.3	3.91807	0.579506	-1.633	-1.18957	-4.22052	-1.48679
182.4	5.0357	-4.78605	-4.26215	-1.42601	-6.57364	-1.3164		182.4	3.70071	0.858721	-1.08194	-0.815405	-4.41675	-1.23373
182.5	6.23164	-6.41598	-3.9148	-2.75759	-5.50399	-3.04142		182.5	3.55351	1.10707	-0.64116	-0.470572	-4.60616	-1.04384
182.6	6.85685	-6.60278	-3.05774	-3.43795	-4.42944	-4.25663		182.6	3.53371	1.26432	-0.322013	-0.226273	-4.75739	-0.970308
182.7	6.91611	-5.2652	-1.61374	-3.3202	-3.57362	-4.63927		182.7	3.6825	1.30442	-0.102471	-0.131586	-4.82439	-1.03622
182.8	6.4978	-2.7351	0.335831	-2.524	-3.03457	-4.14581		182.8	4.00291	1.23813	0.061365	-0.199579	-4.76141	-1.24178
182.9	5.72634	0.373498	2.4655	-1.35563	-2.80731	-3.02902		182.9	4.4525	1.10778	0.220648	-0.401435	-4.54465	-1.56993
183	4.73295	3.38655	4.27275	-0.168773	-2.86519	-1.7113		183	4.95534	0.977745	0.419109	-0.672971	-4.18537	-1.98512
183.1	3.68587	5.74688	5.28883	0.774116	-3.19688	-0.621435		183.1	5.42578	0.919286	0.680446	-0.934903	-3.73131	-2.43065
183.2	2.8172	7.13346	5.31088	1.34592	-3.74392	-0.0525078		183.2	5.79108	0.990693	1.0048	-1.11739	-3.25495	-2.8369
183.3	2.41713	7.47758	4.47608	1.51431	-4.32529	-0.0876304		183.3	6.00929	1.21691	1.37098	-1.17804	-2.83411	-3.13953
183.4	2.72543	6.91242	3.14908	1.2861	-4.64672	-0.61528		183.4	6.07614	1.57665	1.74078	-1.11126	-2.52972	-3.29943
183.5	3.80926	5.68391	1.76064	0.675833	-4.45643	-1.45287		183.5	6.0211	2.00408	2.06185	-0.950637	-2.37042	-3.31741
183.6	5.48022	4.07826	0.675565	-0.253936	-3.66743	-2.4798		183.6	5.89627	2.40476	2.27242	-0.761615	-2.3499	-3.23819
183.7	7.32546	2.37584	0.119502	-1.32495	-2.41817	-3.63212		183.7	5.76467	2.68081	2.31372	-0.621753	-2.43525	-3.13591
183.8	8.86322	0.824834	0.142798	-2.26788	-1.01195	-4.82018		183.8	5.68833	2.75838	2.149	-0.595879	-2.57894	-3.08712
183.9	9.69783	-0.360683	0.620046	-2.84419	0.163146	-5.85255		183.9	5.71543	2.60885	1.78261	-0.71853	-2.72777	-3.14629
184	9.62926	-0.985673	1.31252	-2.91086	0.757293	-6.47314		184	5.86724	2.25571	1.26652	-0.99343	-2.831	-3.33129
184.1	8.74542	-0.94043	1.96295	-2.45699	0.580683	-6.46111		184.1	6.12948	1.7648	0.685944	-1.40571	-2.85372	-3.6222
184.2	7.36797	-0.300332	2.37174	-1.62234	-0.3294	-5.7597		184.2	6.44736	1.22354	0.132506	-1.9347	-2.79029	-3.97229
184.3	5.92117	0.663484	2.40047	-0.707363	-1.72129	-4.56221		184.3	6.73073	0.717608	-0.3223	-2.55679	-2.66747	-4.32778
184.4	4.7941	1.54642	1.96593	-0.106828	-3.22483	-3.29255		184.4	6.87391	0.310915	-0.642988	-3.2387	-2.53505	-4.64356
184.5	4.26047	1.95775	1.03794	-0.146336	-4.48549	-2.40708		184.5	6.7883	0.0324841	-0.833591	-3.93368	-2.45189	-4.8884
184.6	4.42871	1.69218	-0.334682	-0.915779	-5.25008	-2.19951		184.6	6.4343	-0.126255	-0.931111	-4.58691	-2.47308	-5.04435
184.7	5.19353	0.844592	-1.95593	-2.25384	-5.39529	-2.71733		184.7	5.83573	-0.203599	-0.992304	-5.14864	-2.63924	-5.1056
184.8	6.26669	-0.256602	-3.48475	-3.89918	-4.95186	-3.76627		184.8	5.07222	-0.256305	-1.07682	-5.59055	-2.96293	-5.08416
184.9	7.27524	-1.21199	-4.55885	-5.66285	-4.13014	-4.99799		184.9	4.25459	-0.35115	-1.23129	-5.92076	-3.41688	-5.014
185	7.82113	-1.72387	-4.93237	-7.47847	-3.2469	-6.03918		185	3.48989	-0.556886	-1.47871	-6.18499	-3.93459	-4.9511
185.1	7.54267	-1.68835	-4.58263	-9.28952	-2.55887	-6.65862		185.1	2.85269	-0.929534	-1.81605	-6.4492	-4.42967	-4.96421
185.2	6.24342	-1.22987	-3.69106	-10.9165	-2.20529	-6.82124		185.2	2.37177	-1.49286	-2.21728	-6.76885	-4.82454	-5.11473
185.3	4.02485	-0.655073	-2.56468	-12.0687	-2.25372	-6.64195		185.3	2.03221	-2.22108	-2.64076	-7.16108	-5.07519	-5.43034
185.4	1.30734	-0.322719	-1.53834	-12.4298	-2.77838	-6.28325		185.4	1.78853	-3.03805	-3.03773	-7.59667	-5.17974	-5.8891
185.5	-1.31238	-0.490022	-0.897488	-11.8173	-3.83668	-5.86148		185.5	1.58387	-3.83946	-3.35983	-8.01525	-5.17138	-6.42285
185.6	-3.28178	-1.25668	-0.8167	-10.3567	-5.33964	-5.48806		185.6	1.36823	-4.52848	-3.56804	-8.35225	-5.10352	-6.93825
185.7	-4.27044	-2.59804	-1.31356	-8.52441	-6.95975	-5.28052		185.7	1.11022	-5.04637	-3.6434	-8.55956	-5.03212	-7.34591
185.8	-4.25452	-4.43794	-2.24306	-6.94887	-8.2204	-5.39169		185.8	0.799122	-5.38542	-3.59519	-8.6111	-4.99703	-7.587
185.9	-3.46453	-6.63535	-3.36308	-6.11395	-8.74572	-5.9826		185.9	0.445143	-5.58168	-3.46418	-8.4973	-5.00968	-7.64873
186	-2.25432	-8.91306	-4.42039	-6.14146	-8.43409	-7.12108		186	0.0813688	-5.69565	-3.3151	-8.2226	-5.05622	-7.55931
186.1	-0.978474	-10.8334	-5.23334	-6.77468	-7.48592	-8.65796		186.1	-0.23811	-5.78948	-3.22065	-7.81029	-5.1099	-7.37119
186.2	0.117907	-11.9307	-5.71059	-7.55128	-6.2629	-10.206		186.2	-0.449848	-5.90841	-3.23853	-7.30799	-5.14102	-7.14116
186.3	0.949443	-11.9317	-5.81028	-8.03169	-5.10785	-11.2733		186.3	-0.501354	-6.07026	-3.38867	-6.79092	-5.1178	-6.91651
186.4	1.52767	-10.8687	-5.49549	-7.98288	-4.2417	-11.4791		186.4	-0.370421	-6.26676	-3.6434	-6.35393	-5.00332	-6.72824
186.5	1.88059	-9.06076	-4.76586	-7.42348	-3.73809	-10.6965		186.5	-0.0739811	-6.47228	-3.93493	-6.08625	-4.76106	-6.58398
186.6	1.9865	-6.97578	-3.73926	-6.53891	-3.5336	-9.09659		186.6	0.337	-6.65236	-4.17766	-6.03659	-4.37079	-6.46842
186.7	1.8035	-5.06038	-2.70524	-5.54396	-3.462	-7.0886		186.7	0.792976	-6.7658	-4.29536	-6.18828	-3.84405	-6.34612
186.8	1.3585	-3.62588	-2.04823	-4.61968	-3.35005	-5.13842		186.8	1.22441	-6.76363	-4.24162	-6.45984	-3.22615	-6.16276
186.9	0.812281	-2.82488	-2.0854	-3.90723	-3.11773	-3.62319		186.9	1.57796	-6.59607	-4.00651	-6.73401	-2.58532	-5.85152
187	0.425305	-2.67686	-2.86863	-3.52952	-2.7829	-2.73149		187	1.82494	-6.23072	-3.61265	-6.9022	-1.9939	-5.34911
187.1	0.431742	-3.07428	-4.09077	-3.6396	-2.38365	-2.46417		187.1	1.95967	-5.67312	-3.10572	-6.90231	-1.5104	-4.6178
187.2	0.913475	-3.83046	-5.22785	-4.38846	-1.89038	-2.66087		187.2	1.99141	-4.97557	-2.54633	-6.73443	-1.16792	-3.66529
187.3	1.7577	-4.75054	-5.77274	-5.80623	-1.22128	-3.03559		187.3	1.93712	-4.22735	-2.00723	-6.4496	-0.9696	-2.55082
187.4	2.71623	-5.65937	-5.43997	-7.6802	-0.325176	-3.31605		187.4	1.81638	-3.52819	-1.56674	-6.12355	-0.889776	-1.37296
187.5	3.49708	-6.36649	-4.24391	-9.52757	0.73417	-3.31257		187.5	1.65128	-2.9567	-1.29178	-5.82992	-0.880594	-0.24375
187.6	3.86985	-6.59836	-2.44965	-10.7304	1.7586	-2.86541		187.6	1.46705	-2.55105	-1.21457	-5.62341	-0.884195	0.741473
187.7	3.75597	-6.06459	-0.423517	-10.8024	2.46002	-1.83002		187.7	1.29043	-2.30636	-1.31699	-5.53433	-0.84626	1.52528
187.8	3.22021	-4.6224	1.46237	-9.63389	2.56814	-0.117025		187.8	1.14377	-2.18246	-1.53079	-5.56917	-0.724	2.09721
187.9	2.4084	-2.45156	2.90719	-7.55324	1.95673	2.22633		187.9	1.03567	-2.11668	-1.75764	-5.71289	-0.491417	2.48757
188	1.48893	-0.0733272	3.69929	-5.17777	0.714293	4.91938		188	0.955836	-2.04117	-1.90308	-5.93102	-0.14659	2.75147
188.1	0.604807	1.85104	3.66929	-3.1406	-0.870308	7.46684		188.1	0.877344	-1.89872	-1.90637	-6.17221	0.284306	2.94889
188.2	-0.172012	2.82491	2.72237	-1.88077	-2.38107	9.32718		188.2	0.765008	-1.65272	-1.75685	-6.37528	0.751353	3.12638
188.3	-0.82013	2.73956	0.935097	-1.5472	-3.37751	10.0999		188.3	0.588897	-1.29214	-1.49101	-6.4822	1.19313	3.31056
188.4	-1.32851	1.83557	-1.39272	-2.03318	-3.52322	9.66019		188.4	0.339058	-0.831557	-1.17568	-6.45635	1.55101	3.50724
188.5	-1.64399	0.533932	-3.78926	-3.10544	-2.70515	8.18628		188.5	0.0333113	-0.313116	-0.887993	-6.30236	1.78154	3.6996
188.6	-1.68099	-0.718546	-5.72005	-4.49947	-1.03931	6.0996		188.6	-0.28731	0.192481	-0.697956	-6.07198	1.86799	3.84731
188.7	-1.41243	-1.55866	-6.72509	-5.97271	1.17102	3.90468		188.7	-0.573261	0.596062	-0.653401	-5.84694	1.8301	3.88995
188.8	-0.925366	-1.79061	-6.56323	-7.34789	3.4784	2.02218		188.8	-0.782869	0.816631	-0.76895	-5.70663	1.72175	3.75713
188.9	-0.420896	-1.40885	-5.28383	-8.48863	5.43486	0.695214		188.9	-0.891582	0.8135	-1.02321	-5.69725	1.61461	3.3878
189	-0.152004	-0.568459	-3.2308	-9.25851	6.71851	-0.0183287		189	-0.892218	0.603868	-1.3617	-5.81788	1.57322	2.75251
189.1	-0.277662	0.470482	-0.920706	-9.49775	7.18511	-0.184914		189.1	-0.789089	0.258183	-1.70602	-6.02495	1.63158	1.87
189.2	-0.750176	1.46341	1.11663	-9.08822	6.8181	0.031059		189.2	-0.592878	-0.124415	-1.97056	-6.25228	1.77973	0.809723
189.3	-1.32785	2.21514	2.44107	-8.11249	5.67763	0.404664		189.3	-0.316487	-0.446129	-2.08036	-6.43714	1.96612	-0.321279
189.4	-1.69459	2.53055	2.80712	-6.88596	3.92955	0.68108		189.4	0.0241516	-0.636887	-1.98743	-6.53861	2.11542	-1.40185
189.5	-1.64096	2.23848	2.2198	-5.80821	1.92404	0.607707		189.5	0.406084	-0.671019	-1.68626	-6.5442	2.15164	-2.32596
189.6	-1.15495	1.29811	0.942858	-5.16792	0.114824	-0.0315294		189.6	0.799768	-0.567013	-1.22314	-6.4653	2.0201	-3.02806
189.7	-0.359181	-0.12654	-0.623183	-5.01827	-1.10704	-1.35932		189.7	1.17802	-0.373791	-0.690863	-6.3264	1.7023	-3.49429
189.8	0.593988	-1.71272	-2.08492	-5.19138	-1.57392	-3.33301		189.8	1.53006	-0.1525	-0.207394	-6.15614	1.21748	-3.75618
189.9	1.5812	-3.05172	-3.13106	-5.40093	-1.38901	-5.67552		189.9	1.87149	0.0386462	0.117087	-5.98439	0.612503	-3.8722
190	2.51545	-3.76461	-3.56209	-5.4118	-0.859049	-7.92474		190	2.24176	0.153883	0.212035	-5.84743	-0.0518251	-3.90783
190.1	3.37013	-3.63358	-3.25929	-5.17575	-0.354536	-9.56684		190.1	2.68607	0.163929	0.0660573	-5.79133	-0.710657	-3.91885
190.2	4.14687	-2.70895	-2.20956	-4.83051	-0.167054	-10.1835		190.2	3.23184	0.0590209	-0.273528	-5.8626	-1.29832	-3.94212
190.3	4.81185	-1.2988	-0.600164	-4.59445	-0.42349	-9.61017		190.3	3.87008	-0.144504	-0.719612	-6.09059	-1.75144	-3.9944
190.4	5.28021	0.209449	1.14791	-4.63134	-1.0653	-8.03109		190.4	4.55342	-0.401386	-1.17451	-6.47056	-2.02095	-4.07382
190.5	5.5049	1.49415	2.48557	-4.98674	-1.92413	-5.90375		190.5	5.21324	-0.644313	-1.55996	-6.95733	-2.08601	-4.16014
190.6	5.56373	2.35309	2.93514	-5.5941	-2.80713	-3.75693		190.6	5.78377	-0.800255	-1.83387	-7.47603	-1.96416	-4.21348
190.7	5.65232	2.68103	2.28539	-6.33883	-3.56605	-1.99062		190.7	6.22076	-0.810294	-1.99249	-7.94562	-1.71123	-4.17723
190.8	6.01695	2.42951	0.693407	-7.16939	-4.10847	-0.790649		190.8	6.50858	-0.649705	-2.06188	-8.30312	-1.40725	-3.99317
190.9	6.80303	1.6342	-1.36499	-8.13456	-4.38204	-0.156159		190.9	6.65676	-0.3382	-2.08309	-8.51665	-1.13265	-3.62228
191	7.95029	0.431696	-3.33188	-9.32409	-4.31262	0.00907997		191	6.69068	0.067124	-2.10229	-8.586	-0.944935	-3.06221
191.1	9.15551	-0.929382	-4.7763	-10.7618	-3.77353	-0.20774		191.1	6.64361	0.492718	-2.1674	-8.53626	-0.866983	-2.35634
191.2	9.97584	-2.1285	-5.51355	-12.2676	-2.65764	-0.742442		191.2	6.55009	0.872983	-2.32237	-8.40903	-0.890574	-1.58609
191.3	10.0619	-2.83166	-5.60979	-13.443	-0.991239	-1.49894		191.3	6.44163	1.16213	-2.5954	-8.25354	-0.988342	-0.845977
191.4	9.33989	-2.77754	-5.27953	-13.8363	0.964396	-2.26604		191.4	6.34206	1.33515	-2.98456	-8.1151	-1.12426	-0.214123
191.5	8.0228	-1.88338	-4.78161	-13.1744	2.72604	-2.71685		191.5	6.26368	1.3838	-3.44873	-8.02532	-1.26212	0.26681
191.6	6.47425	-0.321708	-4.31067	-11.4784	3.77854	-2.5465		191.6	6.20438	1.31484	-3.9146	-7.99527	-1.3704	0.593638
191.7	5.03444	1.53098	-3.92261	-9.0418	3.80926	-1.6196		191.7	6.14631	1.15252	-4.30221	-8.01078	-1.42394	0.793037
191.8	3.94677	3.25693	-3.58571	-6.35476	2.83655	-0.0456052		191.8	6.06096	0.938227	-4.55514	-8.03094	-1.40525	0.908179
191.9	3.34664	4.52615	-3.31635	-3.98484	1.15813	1.81629		191.9	5.91725	0.724349	-4.65763	-7.99256	-1.31042	0.987584
192	3.22209	5.16571	-3.23471	-2.43155	-0.824549	3.48408		192	5.69296	0.559441	-4.63598	-7.824	-1.15844	1.07883
192.1	3.43635	5.12502	-3.49363	-1.98802	-2.72734	4.55079		192.1	5.38485	0.471533	-4.54376	-7.46639	-0.994562	1.22314
192.2	3.81219	4.43541	-4.13008	-2.63325	-4.23467	4.83776		192.2	5.01183	0.456691	-4.43861	-6.89728	-0.882245	1.44808
192.3	4.23131	3.18008	-4.95587	-4.06799	-5.15075	4.41893		192.3	4.61136	0.477439	-4.36193	-6.14552	-0.881739	1.75775
192.4	4.64425	1.5087	-5.63432	-5.82796	-5.40686	3.56547		192.4	4.22921	0.472678	-4.32759	-5.28864	-1.02142	2.12533
192.5	5.02977	-0.329891	-5.89599	-7.43306	-5.01862	2.59913		192.5	3.90797	0.37661	-4.3251	-4.43273	-1.278	2.49623
192.6	5.35212	-2.00876	-5.66473	-8.4772	-4.06428	1.80126		192.6	3.67852	0.138415	-4.33467	-3.68077	-1.58011	2.8012
192.7	5.50719	-3.20422	-5.07422	-8.6717	-2.70056	1.35896		192.7	3.55165	-0.265131	-4.34075	-3.10177	-1.83518	2.97569
192.8	5.34251	-3.73283	-4.40823	-7.89626	-1.18979	1.34349		192.8	3.51387	-0.821833	-4.33326	-2.71169	-1.96263	2.98239
192.9	4.73796	-3.62294	-3.94593	-6.18825	0.128199	1.71074		192.9	3.53562	-1.48234	-4.29743	-2.4729	-1.91568	2.82694
193	3.72064	-3.08398	-3.8222	-3.76807	0.91815	2.32506		193	3.58545	-2.16624	-4.20353	-2.31166	-1.68945	2.55637
193.1	2.53181	-2.42483	-3.97585	-1.0564	0.972995	2.99837		193.1	3.63854	-2.77772	-4.00742	-2.14581	-1.31527	2.24222
193.2	1.52621	-1.96431	-4.19794	1.39254	0.351513	3.53194		193.2	3.67743	-3.22711	-3.66759	-1.91028	-0.847234	1.95613
193.3	1.01321	-1.95486	-4.26835	3.0721	-0.583319	3.75891		193.3	3.69116	-3.45429	-3.1656	-1.57053	-0.349094	1.74909
193.4	1.13384	-2.51834	-4.08519	3.74159	-1.32666	3.5648		193.4	3.67524	-3.44746	-2.51716	-1.1226	0.114367	1.64236
193.5	1.79	-3.60335	-3.68919	3.48823	-1.49971	2.92074		193.5	3.63207	-3.24459	-1.77074	-0.587544	0.485602	1.62882
193.6	2.70431	-4.93778	-3.18894	2.64656	-1.00845	1.9302		193.6	3.5761	-2.91967	-0.995304	-0.00643249	0.726454	1.68033
193.7	3.59189	-6.06285	-2.6257	1.62778	-0.0263162	0.841433		193.7	3.54085	-2.55888	-0.25785	0.564079	0.828841	1.75755
193.8	4.28337	-6.50132	-1.8972	0.75313	1.11853	-0.0488956		193.8	3.57985	-2.23645	0.396027	1.05448	0.820038	1.82002
193.9	4.7148	-5.95983	-0.796315	0.186218	2.12625	-0.502709		193.9	3.75427	-1.99798	0.949979	1.39096	0.758457	1.83481
194	4.89252	-4.45946	0.821277	-0.0639695	2.80595	-0.44463		194	4.10926	-1.85392	1.41281	1.51408	0.718447	1.78357
194.1	4.87766	-2.35346	2.89942	-0.0521818	3.06152	0.0458192		194.1	4.65195	-1.78186	1.80681	1.40281	0.767782	1.6656
194.2	4.75904	-0.213647	5.12752	0.181701	2.86021	0.784586		194.2	5.34278	-1.73624	2.15753	1.08917	0.943584	1.49607
194.3	4.61831	1.43995	7.02443	0.61872	2.24673	1.57122		194.3	6.10509	-1.65915	2.48869	0.651121	1.23733	1.30667
194.4	4.55556	2.31943	8.10822	1.2072	1.39391	2.23461		194.4	6.85211	-1.4915	2.82015	0.187175	1.59951	1.14581
194.5	4.7433	2.40056	8.12848	1.80244	0.550789	2.65624		194.5	7.51387	-1.18846	3.16518	-0.214713	1.9608	1.0692
194.6	5.40105	1.85835	7.16998	2.14855	-0.0214507	2.77265		194.6	8.05169	-0.736967	3.52502	-0.498265	2.25747	1.12146
194.7	6.68578	0.970125	5.59498	1.95206	-0.128725	2.5765		194.7	8.45921	-0.167921	3.88177	-0.645605	2.44934	1.3156
194.8	8.56656	0.0241836	3.89234	1.03667	0.292814	2.12733		194.8	8.75666	0.444978	4.19449	-0.672036	2.52164	1.62464
194.9	10.7519	-0.739402	2.50005	-0.499071	1.19021	1.52637		194.9	8.98184	1.00358	4.40476	-0.614617	2.48055	1.98833
195	12.7573	-1.17923	1.6938	-2.25971	2.40533	0.87687		195	9.17872	1.41693	4.45242	-0.524395	2.35014	2.33176
195.1	14.0931	-1.20775	1.54463	-3.70528	3.66708	0.345079		195.1	9.38582	1.63309	4.29691	-0.46046	2.16797	2.59089
195.2	14.4893	-0.753306	1.94549	-4.39887	4.65722	0.186081		195.2	9.6284	1.65187	3.939	-0.48248	1.97546	2.73185
195.3	13.9543	0.213892	2.67657	-4.18552	5.13362	0.62781		195.3	9.91101	1.51552	3.43213	-0.639244	1.80341	2.75395
195.4	12.7348	1.61247	3.49165	-3.1926	5.01696	1.72992		195.4	10.2111	1.28741	2.87074	-0.95378	1.66378	2.68222
195.5	11.2112	3.17246	4.16754	-1.75166	4.38041	3.25152		195.5	10.4776	1.02886	2.35883	-1.41117	1.54825	2.55538
195.6	9.77135	4.45945	4.52001	-0.263096	3.3553	4.75098		195.6	10.6405	0.783995	1.97425	-1.954	1.43391	2.41277
195.7	8.72072	5.03676	4.39585	0.912155	2.10738	5.73809		195.7	10.6307	0.575473	1.74609	-2.49082	1.29268	2.28298
195.8	8.22454	4.67349	3.70954	1.48159	0.844619	5.88403		195.8	10.4037	0.410273	1.6536	-2.91983	1.09578	2.1795
195.9	8.27982	3.4611	2.48384	1.2686	-0.23671	5.18992		195.9	9.96061	0.289599	1.64009	-3.16207	0.812782	2.10475
196	8.74218	1.75922	0.939964	0.24438	-1.0259	3.96739		196	9.3539	0.211099	1.63593	-3.19191	0.413261	2.05428
196.1	9.35986	0.00151716	-0.508456	-1.45779	-1.53101	2.61038		196.1	8.67438	0.162398	1.58296	-3.04942	-0.122575	2.01395
196.2	9.84563	-1.47742	-1.41523	-3.54468	-1.82288	1.43686		196.2	8.0247	0.112719	1.4506	-2.82757	-0.790195	1.95571
196.3	9.93111	-2.53696	-1.53247	-5.62713	-1.98548	0.616347		196.3	7.48869	0.0123819	1.23793	-2.64201	-1.55324	1.8398
196.4	9.45527	-3.19256	-0.942958	-7.27591	-2.07245	0.152095		196.4	7.109	-0.19215	0.966842	-2.59463	-2.34623	1.62971
196.5	8.3997	-3.52069	0.0137765	-8.0894	-2.10816	-0.0790581		196.5	6.88084	-0.532616	0.671757	-2.74437	-3.08771	1.30966
196.6	6.89299	-3.54781	0.927656	-7.79213	-2.15714	-0.232747		196.6	6.76223	-0.999801	0.393364	-3.09226	-3.70161	0.896412
196.7	5.2243	-3.23068	1.46411	-6.37783	-2.40556	-0.393978		196.7	6.69311	-1.54428	0.175949	-3.58454	-4.13993	0.436507
196.8	3.77918	-2.54226	1.47392	-4.2126	-3.12477	-0.51288		196.8	6.61601	-2.09547	0.0646024	-4.13339	-4.39579	-0.0106714
196.9	2.93742	-1.58123	1.04497	-1.97657	-4.452	-0.499453		196.9	6.48979	-2.58706	0.0953679	-4.6445	-4.50309	-0.393841
197	2.90977	-0.630637	0.426455	-0.414031	-6.21591	-0.362346		197	6.29638	-2.97636	0.280463	-5.04087	-4.52373	-0.679824
197.1	3.62266	-0.0932659	-0.123739	-0.038093	-7.95486	-0.240612		197.1	6.04188	-3.25156	0.598883	-5.2793	-4.52911	-0.857001
197.2	4.75643	-0.304587	-0.440914	-0.946154	-9.10032	-0.31993		197.2	5.75424	-3.42741	0.998634	-5.35555	-4.5788	-0.932416
197.3	5.89268	-1.32847	-0.496443	-2.80875	-9.24993	-0.689846		197.3	5.47546	-3.53663	1.4096	-5.30062	-4.70493	-0.925058
197.4	6.70442	-2.90538	-0.33683	-5.00197	-8.32895	-1.28717		197.4	5.25145	-3.62142	1.7624	-5.17242	-4.90608	-0.85823
197.5	7.0495	-4.58259	0.0134909	-6.88716	-6.60678	-1.93436		197.5	5.12219	-3.7264	2.00597	-5.04393	-5.15077	-0.751583
197.6	6.96899	-5.90912	0.590946	-8.06176	-4.58632	-2.41211		197.6	5.11251	-3.89006	2.11937	-4.98654	-5.38287	-0.616908
197.7	6.59651	-6.59793	1.46298	-8.44462	-2.85003	-2.54649		197.7	5.22491	-4.1346	2.11352	-5.05085	-5.52751	-0.461699
197.8	6.07191	-6.61652	2.63815	-8.19607	-1.88179	-2.25133		197.8	5.43436	-4.45773	2.02576	-5.25038	-5.50788	-0.294506
197.9	5.51907	-6.15591	3.99791	-7.59792	-1.91445	-1.57514		197.9	5.69036	-4.82952	1.91125	-5.55692	-5.27111	-0.127016
198	5.04138	-5.52638	5.2633	-6.92347	-2.83015	-0.665712		198	5.92724	-5.19346	1.83193	-5.91041	-4.8103	0.0288844
198.1	4.71595	-5.04919	6.04346	-6.34206	-4.21675	0.277183		198.1	6.08365	-5.47528	1.84036	-6.23986	-4.17495	0.167707
198.2	4.59154	-4.96224	6.0113	-5.90991	-5.52771	1.05702		198.2	6.12308	-5.60219	1.96669	-6.4876	-3.46057	0.296289
198.3	4.69557	-5.33235	5.06846	-5.60786	-6.31681	1.58025		198.3	6.04421	-5.5238	2.21221	-6.62636	-2.78215	0.434037
198.4	5.05975	-6.01303	3.39186	-5.40221	-6.35118	1.8955		198.4	5.8768	-5.2285	2.55021	-6.66165	-2.24125	0.605677
198.5	5.68986	-6.69934	1.37457	-5.3059	-5.58379	2.12567		198.5	5.66782	-4.75129	2.93203	-6.62268	-1.89917	0.82603
198.6	6.49821	-7.07451	-0.447051	-5.36856	-4.11827	2.34284		198.6	5.46449	-4.167	3.29468	-6.54747	-1.76219	1.08446
198.7	7.26177	-6.95105	-1.52025	-5.62527	-2.19069	2.48497		198.7	5.30246	-3.56898	3.57311	-6.46914	-1.7825	1.33788
198.8	7.64947	-6.28015	-1.47208	-6.04732	-0.121086	2.4097		198.8	5.20004	-3.04204	3.71252	-6.40773	-1.87691	1.52042
198.9	7.41546	-5.09561	-0.297722	-6.54691	1.70049	2.04006		198.9	5.15767	-2.64097	3.68195	-6.37183	-1.95678	1.56421
199	6.563	-3.48585	1.65116	-7.02023	2.89462	1.49605		199	5.18528	-2.49046	3.53435	-6.37369	-1.81554	1.64465
199.1	5.36361	-1.5729	3.8371	-7.36094	3.20412	1.05453		199.1	5.22486	-2.32567	3.36922	-6.40461	-1.56806	1.68382
199.2	4.20348	0.43756	5.7594	-7.4871	2.58852	0.983536		199.2	5.26267	-2.11091	3.24785	-6.46152	-1.22886	1.69122
199.3	3.41648	2.20354	7.08194	-7.39922	1.22907	1.33389		199.3	5.27828	-1.81074	3.23677	-6.543	-0.834836	1.67551
199.4	3.13977	3.3349	7.62808	-7.16604	-0.521422	1.8468		199.4	5.24398	-1.40336	3.39196	-6.64609	-0.439089	1.63799
199.5	3.31744	3.54984	7.37139	-6.86454	-2.22702	2.05688		199.5	5.12996	-0.887803	3.74096	-6.76223	-0.104618	1.57392
199.6	3.77803	2.80208	6.36785	-6.55391	-3.5194	1.52806		199.6	4.91678	-0.281479	4.26708	-6.87593	0.103989	1.48281
[truncated: 1 more rows]

## Sheet: 0
20180420_c1
raw								filter
time	spine 1	spine 2	spine 3	spine 4	spine 5	spine 6		time	spine 1	spine 2	spine 3	spine 4	spine 5	spine 6
0	3.09968	0.901212	3.09259	3.11739	-4.03511	6.20991		0	5.86326	1.77374	-0.232042	1.66606	-1.83561	2.05597
0.100006	3.81875	0.236329	0.76414	1.32087	-2.99488	5.11315		0.100006	5.59995	1.9863	0.166096	2.29669	-2.24204	2.14023
0.200012	4.9114	0.152208	-1.26284	-0.116069	-1.78059	3.32261		0.200012	5.15621	2.12513	0.563661	2.83371	-2.76219	2.23325
0.300003	6.10253	0.59628	-2.54578	-0.901792	-0.747616	1.44029		0.300003	4.6007	2.17313	0.933566	3.17811	-3.33003	2.26916
0.400009	7.10154	1.3709	-2.82546	-0.86731	-0.156287	0.0537453		0.400009	4.02276	2.12134	1.26323	3.28556	-3.87467	2.19781
0.5	7.67828	2.23594	-2.12081	0.0586326	-0.155715	-0.47098		0.5	3.50464	1.97351	1.54487	3.17143	-4.34266	1.98816
0.600006	7.67127	3.00412	-0.714812	1.82119	-0.795869	-0.100167		0.600006	3.10015	1.7497	1.77401	2.89737	-4.71281	1.63022
0.700012	6.95056	3.57345	0.977545	4.13514	-2.0439	0.893044		0.700012	2.82686	1.48463	1.95626	2.54688	-4.99401	1.13382
0.800003	5.43532	3.8932	2.54704	6.42648	-3.81057	2.04213		0.800003	2.67156	1.22006	2.11127	2.19988	-5.21094	0.528125
0.900009	3.23013	3.89938	3.74934	7.97236	-5.89985	2.89854		0.900009	2.57195	0.997417	2.21782	1.84243	-5.4692	-0.512286
1	0.718887	3.51339	4.53931	8.20391	-7.96373	3.16343		1	2.4725	0.85088	2.50574	1.65171	-5.78667	-1.56541
1.10001	-1.5099	2.70112	5.00252	6.96655	-9.57627	2.66419		1.10001	2.31636	0.760508	2.97114	1.61658	-6.17961	-2.51349
1.20001	-2.91261	1.49996	5.21916	4.57488	-10.4104	1.34166		1.20001	2.06457	0.693008	3.56206	1.68704	-6.63855	-3.27369
1.3	-3.23093	0.0517023	5.20619	1.68779	-10.4265	-0.737253		1.3	1.70221	0.612878	4.18936	1.79096	-7.13795	-3.81788
1.40001	-2.56269	-1.38369	4.98206	-0.939422	-9.89481	-3.38101		1.40001	1.23898	0.49073	4.75347	1.84612	-7.64525	-4.17362
1.5	-1.2725	-2.49133	4.69003	-2.71046	-9.21203	-6.31218		1.5	0.711644	0.305985	5.17391	1.77275	-8.1278	-4.40559
1.60001	0.186747	-3.01308	4.59132	-3.3522	-8.68191	-9.16299		1.60001	0.184322	0.0453169	5.40818	1.50998	-8.55326	-4.58802
1.70001	1.40638	-2.88377	4.90399	-2.95923	-8.42557	-11.4771		1.70001	-0.260057	-0.298746	5.45679	1.03492	-8.88467	-4.77875
1.8	2.12808	-2.25481	5.65882	-1.92139	-8.39179	-12.7899		1.8	-0.540588	-0.727773	5.35378	0.375285	-9.08224	-5.00758
1.90001	2.25694	-1.38412	6.64897	-0.713205	-8.46052	-12.7947		1.90001	-0.604906	-1.23476	5.15055	-0.395774	-9.11649	-5.27337
2	1.8221	-0.551221	7.4998	0.295906	-8.54965	-11.4832		2	-0.451279	-1.80011	4.90118	-1.18112	-8.98604	-5.54517
2.10001	0.941466	0.00868507	7.83866	0.899357	-8.646	-9.19749		2.10001	-0.134866	-2.38483	4.65415	-1.88489	-8.72721	-5.77092
2.20001	-0.196563	0.159424	7.46906	0.996375	-8.77982	-6.51853		2.20001	0.246448	-2.9315	4.44787	-2.43382	-8.40121	-5.89032
2.3	-1.29348	-0.136541	6.43261	0.573986	-8.99932	-4.04361		2.3	0.580637	-3.37904	4.3079	-2.79222	-8.06699	-5.84537
2.40001	-2.01392	-0.857905	4.9602	-0.332008	-9.27672	-2.20822		2.40001	0.77601	-3.68623	4.23974	-2.96778	-7.75927	-5.58848
2.5	-2.11913	-1.95587	3.37334	-1.6495	-9.44454	-1.2004		2.5	0.78749	-3.85259	4.22381	-3.0064	-7.48392	-5.09301
2.60001	-1.53889	-3.39409	1.99819	-3.2415	-9.25861	-0.991578		2.60001	0.625499	-3.92204	4.21957	-2.97667	-7.22595	-4.36796
2.70001	-0.374516	-5.10534	1.08448	-4.90409	-8.54596	-1.3549		2.70001	0.344335	-3.96707	4.17731	-2.94929	-6.96236	-3.47089
2.8	1.10177	-6.90983	0.763256	-6.38432	-7.35848	-1.95647		2.8	0.0196837	-4.06303	4.05318	-2.97956	-6.67127	-2.50583
2.90001	2.46641	-8.44028	1.01957	-7.38918	-6.01036	-2.49609		2.90001	-0.273956	-4.26238	3.82256	-3.09867	-6.33635	-1.60146
3	3.2514	-9.24177	1.6994	-7.64414	-4.88447	-2.76709		3	-0.479132	-4.57861	3.48908	-3.3105	-5.94694	-0.874872
3.10001	3.11852	-8.9919	2.60257	-7.03218	-4.21307	-2.61685		3.10001	-0.563417	-4.98597	3.08565	-3.59059	-5.49712	-0.396632
3.20001	2.04886	-7.71347	3.53131	-5.69493	-3.98088	-1.94507		3.20001	-0.524935	-5.43114	2.66791	-3.89382	-4.98619	-0.174969
3.3	0.381905	-5.84129	4.32055	-4.00877	-4.00088	-0.739996		3.3	-0.392112	-5.84814	2.30151	-4.16345	-4.4253	-0.163916
3.40001	-1.34747	-4.06431	4.83193	-2.4538	-4.04005	0.848815		3.40001	-0.216934	-6.17038	2.04499	-4.33664	-3.84496	-0.286934
3.5	-2.65171	-3.02041	4.94034	-1.45596	-3.91081	2.46026		3.5	-0.0649676	-6.33648	1.93251	-4.35115	-3.29441	-0.462976
3.60001	-3.26213	-3.01535	4.53874	-1.22779	-3.51191	3.61138		3.60001	-0.00518582	-6.29745	1.96361	-4.15591	-2.83221	-0.627172
3.70001	-3.16977	-3.9402	3.57937	-1.72889	-2.85611	3.89106		3.70001	-0.0941673	-6.02963	2.10369	-3.72543	-2.51028	-0.742281
3.8	-2.54653	-5.36728	2.16944	-2.70176	-2.02598	3.15444		3.8	-0.352855	-5.55077	2.29482	-3.07723	-2.35647	-0.797875
3.90001	-1.62942	-6.76566	0.610839	-3.76517	-1.13296	1.61156		3.90001	-0.750085	-4.92808	2.47246	-2.28081	-2.36574	-0.801238
4	-0.639272	-7.70438	-0.66899	-4.58103	-0.313497	-0.275347		4	-1.20597	-4.26772	2.57919	-1.44622	-2.50362	-0.772436
4.10001	0.244057	-7.94689	-1.26859	-4.91565	0.258392	-2.02032		4.10001	-1.61977	-3.68567	2.57495	-0.693104	-2.71801	-0.743963
4.20001	0.858909	-7.43395	-0.987647	-4.59378	0.421284	-3.29169		4.20001	-1.90778	-3.27192	2.44232	-0.114156	-2.95285	-0.759502
4.3	1.04453	-6.21778	0.0861588	-3.48812	0.100726	-3.98429		4.3	-2.03101	-3.06205	2.18901	0.251794	-3.15993	-0.86606
4.40001	0.641774	-4.44193	1.61309	-1.58492	-0.688468	-4.14623		4.40001	-2.0003	-3.02851	1.84806	0.427832	-3.30816	-1.09709
4.5	-0.410918	-2.35692	3.14465	0.93377	-1.88565	-3.91331		4.5	-1.86122	-3.09451	1.47659	0.48525	-3.38888	-1.45401
4.60001	-1.93128	-0.299528	4.26871	3.63012	-3.39563	-3.4412		4.60001	-1.67283	-3.16395	1.14832	0.517505	-3.41426	-1.89819
4.70001	-3.50152	1.34384	4.71933	5.89501	-5.04204	-2.82425		4.70001	-1.48919	-3.15507	0.936794	0.609894	-3.41322	-2.36144
4.8	-4.63147	2.23421	4.41699	7.15585	-6.55717	-2.12721		4.8	-1.34888	-3.02455	0.896387	0.813189	-3.42336	-2.7702
4.90001	-4.98574	2.18139	3.4592	7.10812	-7.62548	-1.46102		4.90001	-1.27031	-2.77441	1.04505	1.13453	-3.48043	-3.06897
5	-4.51431	1.19247	2.06584	5.83335	-7.99311	-1.00416		5	-1.2496	-2.44386	1.35387	1.54361	-3.60484	-3.23444
5.10001	-3.44233	-0.496478	0.525623	3.76736	-7.56035	-0.962672		5.10001	-1.26124	-2.09209	1.75133	1.98399	-3.79223	-3.27675
5.20001	-2.12964	-2.45019	-0.855679	1.53667	-6.43075	-1.46731		5.20001	-1.26169	-1.78162	2.1427	2.38372	-4.01526	-3.23111
5.3	-0.897841	-4.13731	-1.77634	-0.251688	-4.88409	-2.45622		5.3	-1.19601	-1.56497	2.44004	2.6655	-4.22955	-3.14539
5.40001	0.0329122	-5.12069	-2.00122	-1.18055	-3.28764	-3.65999		5.40001	-1.00849	-1.47305	2.58733	2.76008	-4.38085	-3.06694
5.5	0.575247	-5.21633	-1.42648	-1.13116	-2.00831	-4.72087		5.5	-0.660977	-1.50922	2.57274	2.62413	-4.41379	-3.03331
5.60001	0.755866	-4.5468	-0.0760826	-0.309148	-1.30532	-5.3373		5.60001	-0.148943	-1.64886	2.42548	2.25808	-4.28535	-3.07111
5.70001	0.696438	-3.45214	1.85836	0.881846	-1.28368	-5.3545		5.70001	0.490486	-1.84462	2.20335	1.71523	-3.98047	-3.19576
5.8	0.596162	-2.32756	3.98132	2.03863	-1.85664	-4.83317		5.8	1.18636	-2.0342	1.97537	1.09416	-3.5238	-3.40958
5.90001	0.660953	-1.45384	5.76919	2.89261	-2.76434	-4.01104		5.90001	1.85395	-2.1474	1.80593	0.513468	-2.97797	-3.69805
6	1.03701	-0.939731	6.73941	3.3073	-3.69067	-3.20837		6	2.41841	-2.11842	1.74158	0.0750357	-2.42857	-4.02522
6.10001	1.75835	-0.758816	6.66781	3.20548	-4.3315	-2.68909		6.10001	2.8324	-1.90529	1.80048	-0.166694	-1.9587	-4.33438
6.20001	2.77682	-0.79436	5.64868	2.54156	-4.45774	-2.57957		6.20001	3.08215	-1.51079	1.96719	-0.219586	-1.62512	-4.56014
6.3	3.97649	-0.914429	4.02062	1.319	-3.9556	-2.86956		6.3	3.18559	-0.988956	2.19511	-0.14804	-1.44389	-4.64632
6.40001	5.20305	-1.03008	2.21589	-0.327795	-2.85854	-3.46686		6.40001	3.18255	-0.433198	2.41324	-0.0488029	-1.38766	-4.56149
6.5	6.23883	-1.09363	0.64087	-2.07272	-1.3743	-4.24627		6.5	3.12262	0.0485657	2.5349	-0.0167859	-1.39765	-4.30958
6.60001	6.84403	-1.04147	-0.416479	-3.45005	0.138018	-5.09591		6.60001	3.05129	0.361938	2.47556	-0.116771	-1.40226	-3.93162
6.70001	6.83474	-0.731896	-0.814705	-4.03839	1.28597	-5.90809		6.70001	2.99639	0.449108	2.18284	-0.371483	-1.33929	-3.49495
6.8	6.15354	-0.00389348	-0.568363	-3.68599	1.77944	-6.52467		6.8	2.96269	0.29824	1.66343	-0.765568	-1.17332	-3.07687
6.90001	4.90828	1.17298	0.145766	-2.57273	1.55708	-6.72299		6.90001	2.93619	-0.0577839	0.988931	-1.25686	-0.901603	-2.74658
7	3.34778	2.56932	1.05773	-1.15086	0.786758	-6.29416		7	2.8949	-0.551156	0.273446	-1.78741	-0.552406	-2.55057
7.10001	1.79137	3.75044	1.87338	0.0357276	-0.206766	-5.12498		7.10001	2.81457	-1.09842	-0.364702	-2.29357	-0.178962	-2.50164
7.20001	0.52358	4.23155	2.28176	0.555879	-1.05244	-3.27878		7.20001	2.67041	-1.62175	-0.836411	-2.71426	0.150582	-2.57862
7.3	-0.262821	3.64319	1.992	0.23514	-1.47505	-1.05492		7.3	2.43846	-2.0655	-1.09961	-2.99891	0.367383	-2.73661
7.40001	-0.516156	1.87519	0.849724	-0.817904	-1.36213	1.07098		7.40001	2.10286	-2.40369	-1.16121	-3.11717	0.418107	-2.92184
7.5	-0.337212	-0.84567	-0.994979	-2.29148	-0.786085	2.59014		7.5	1.66467	-2.63985	-1.06707	-3.07289	0.278765	-3.08378
7.60001	0.0881105	-4.0186	-3.06081	-3.80683	0.0570813	3.09633		7.60001	1.15003	-2.80539	-0.886347	-2.91046	-0.038742	-3.18341
7.70001	0.586493	-6.99214	-4.72706	-5.04459	0.928556	2.40652		7.70001	0.612019	-2.9553	-0.692435	-2.70413	-0.487849	-3.20004
7.8	1.05632	-9.14614	-5.49543	-5.81387	1.60485	0.643118		7.8	0.123286	-3.1566	-0.544671	-2.53384	-0.997827	-3.13604
7.90001	1.41118	-10.0978	-5.19984	-6.06321	1.8908	-1.74773		7.90001	-0.240826	-3.46753	-0.479818	-2.45815	-1.49127	-3.01875
8	1.52583	-9.81101	-3.99843	-5.83273	1.64666	-4.17821		8	-0.425197	-3.91466	-0.50989	-2.4955	-1.90351	-2.89806
8.10001	1.25987	-8.57393	-2.25845	-5.1668	0.827079	-6.15269		8.10001	-0.413555	-4.47495	-0.6207	-2.62125	-2.1984	-2.83571
8.20001	0.533689	-6.84288	-0.406445	-4.08319	-0.511996	-7.39516		8.20001	-0.233395	-5.07284	-0.769122	-2.77938	-2.37444	-2.88487
8.3	-0.605257	-5.05623	1.18394	-2.69726	-2.23079	-7.84895		8.3	0.0555669	-5.59747	-0.886475	-2.9046	-2.4617	-3.06758
8.40001	-1.9141	-3.54595	2.25761	-1.27708	-4.11166	-7.60183		8.40001	0.384439	-5.93655	-0.896493	-2.94488	-2.50879	-3.36058
8.5	-2.99263	-2.55244	2.72813	-0.178452	-5.85538	-6.80734		8.5	0.696269	-6.01403	-0.741662	-2.87225	-2.566	-3.69651
8.60001	-3.40018	-2.24905	2.65775	0.322186	-7.11254	-5.63511		8.60001	0.957738	-5.81671	-0.405196	-2.68358	-2.66968	-3.98244
8.70001	-2.84213	-2.71659	2.16023	0.13595	-7.60177	-4.30008		8.70001	1.15769	-5.39764	0.0792655	-2.39588	-2.8323	-4.12996
8.8	-1.34293	-3.85075	1.36215	-0.599321	-7.21489	-3.07331		8.8	1.30232	-4.85555	0.636598	-2.03756	-3.03832	-4.08326
8.90001	0.721491	-5.29334	0.397984	-1.58186	-6.06558	-2.21887		8.90001	1.41027	-4.30393	1.17172	-1.64017	-3.24949	-3.83073
9	2.79991	-6.52102	-0.53117	-2.4531	-4.46775	-1.89055		9	1.50931	-3.84248	1.59848	-1.24073	-3.41623	-3.39995
9.10001	4.39619	-7.04348	-1.14528	-2.94665	-2.84553	-2.03511		9.10001	1.63467	-3.53892	1.86329	-0.888292	-3.48633	-2.8454
9.20001	5.25362	-6.60997	-1.16529	-2.97612	-1.58658	-2.39095		9.20001	1.82689	-3.42066	1.95723	-0.640834	-3.40988	-2.23546
9.3	5.38921	-5.3358	-0.428672	-2.57216	-0.915471	-2.61444		9.3	2.12348	-3.4734	1.91368	-0.55012	-3.14394	-1.64002
9.40001	5.03148	-3.63765	0.992858	-1.83713	-0.834032	-2.45425		9.40001	2.54299	-3.6458	1.79251	-0.640896	-2.66288	-1.11837
9.5	4.45542	-2.02198	2.74041	-0.923017	-1.15967	-1.86468		9.5	3.06608	-3.86028	1.65846	-0.897639	-1.97369	-0.713424
9.60001	3.86991	-0.882213	4.27482	0.0281717	-1.6115	-0.953803		9.60001	3.63107	-4.02838	1.56665	-1.26377	-1.12572	-0.446359
9.70001	3.36105	-0.433575	5.09872	0.922996	-1.94331	0.114766		9.70001	4.15059	-4.06866	1.55744	-1.65793	-0.206314	-0.308486
9.8	2.94348	-0.729273	4.99632	1.62354	-2.00742	1.1706		9.8	4.54428	-3.92453	1.65613	-2.00009	0.679945	-0.254603
9.90001	2.66493	-1.68237	4.09539	1.90833	-1.7037	2.03205		9.90001	4.769	-3.58107	1.87137	-2.23439	1.44266	-0.207651
10	2.66239	-3.04581	2.78092	1.50953	-0.931128	2.52009		10	4.82942	-3.07252	2.18946	-2.34029	2.03389	-0.0801394
10.1	3.12803	-4.4425	1.51725	0.265066	0.409228	2.52068		10.1	4.76877	-2.47496	2.56957	-2.33226	2.45767	0.193765
10.2	4.13892	-5.4832	0.668307	-1.72164	2.32269	2.06065		10.2	4.65005	-1.8837	2.94705	-2.25198	2.75835	0.631948
10.3	5.49238	-5.89532	0.378805	-4.04246	4.60367	1.249		10.3	4.53658	-1.38272	3.24824	-2.15339	2.99532	1.19826
10.4	6.76273	-5.57414	0.599575	-6.08822	6.81368	0.240023		10.4	4.47776	-1.02076	3.4168	-2.08356	3.21814	1.81812
10.5	7.48883	-4.53551	1.2056	-7.30007	8.41506	-0.72946		10.5	4.50044	-0.803957	3.43872	-2.0711	3.45087	2.40343
10.6	7.41423	-2.84314	2.0756	-7.39869	9.00084	-1.30287		10.6	4.61154	-0.700664	3.35063	-2.12489	3.69082	2.87824
10.7	6.62012	-0.682208	3.12802	-6.43614	8.49834	-1.09237		10.7	4.80683	-0.653871	3.22381	-2.23555	3.9166	3.19828
10.8	5.42345	1.6018	4.26222	-4.74694	7.20537	0.132589		10.8	5.07623	-0.598612	3.13464	-2.37489	4.09669	3.36275
10.9	4.22248	3.54861	5.29656	-2.83963	5.61779	2.26542		10.9	5.40208	-0.480042	3.13688	-2.49222	4.19629	3.4134
11	3.37094	4.71559	5.98848	-1.2074	4.19606	4.83467		11	5.75381	-0.267123	3.2472	-2.51958	4.18067	3.41935
11.1	3.10248	4.87893	6.11302	-0.161035	3.1944	7.1731		11.1	6.08694	0.0424453	3.44819	-2.38948	4.01952	3.45074
11.2	3.45562	4.13139	5.606	0.264139	2.62835	8.67282		11.2	6.35156	0.428332	3.70366	-2.05973	3.69626	3.55782
11.3	4.25548	2.80346	4.64748	0.239894	2.34481	8.99654		11.3	6.50576	0.859054	3.97372	-1.53714	3.2196	3.7628
11.4	5.2497	1.32242	3.60116	0.00868468	2.13593	8.18655		11.4	6.53173	1.29838	4.22202	-0.88492	2.63043	4.05951
11.5	6.26346	0.0661985	2.84042	-0.257803	1.83087	6.61119		11.5	6.44526	1.70308	4.4185	-0.206036	1.99734	4.41489
11.6	7.24471	-0.742963	2.57955	-0.460482	1.35784	4.82804		11.6	6.29045	2.02292	4.53806	0.387905	1.39995	4.77169
11.7	8.20185	-1.03012	2.81895	-0.484992	0.761942	3.38121		11.7	6.12415	2.20649	4.56361	0.809227	0.904681	5.05626
11.8	9.10739	-0.822871	3.39272	-0.200111	0.143837	2.6219		11.8	5.99458	2.21548	4.49527	1.01756	0.54635	5.19363
11.9	9.80209	-0.220539	4.08505	0.490053	-0.41695	2.59417		11.9	5.92456	2.04166	4.35764	1.02546	0.324267	5.12673
12	9.99094	0.664751	4.72183	1.56331	-0.891751	3.06943		12	5.90416	1.71668	4.19973	0.884721	0.212808	4.83384
12.1	9.3841	1.74813	5.19054	2.79575	-1.28951	3.7246		12.1	5.89738	1.30807	4.08251	0.660445	0.178256	4.34047
12.2	7.93045	2.93295	5.42683	3.78776	-1.60083	4.31463		12.2	5.86007	0.903987	4.05902	0.41057	0.192102	3.71752
12.3	5.94408	4.03689	5.4157	4.14234	-1.76172	4.73863		12.3	5.75524	0.587996	4.15814	0.176181	0.236591	3.06291
12.4	3.98837	4.75502	5.1606	3.66085	-1.65727	4.97319		12.4	5.55831	0.415488	4.37836	-0.0172856	0.303931	2.47013
12.5	2.59644	4.72248	4.6965	2.41555	-1.21423	4.97026		12.5	5.25543	0.397586	4.69131	-0.157602	0.390672	1.99693
12.6	2.01978	3.70143	4.13479	0.702005	-0.473841	4.60072		12.6	4.84217	0.498581	5.04949	-0.247217	0.491153	1.65044
12.7	2.18055	1.76066	3.64876	-1.07308	0.420655	3.69747		12.7	4.3246	0.650226	5.39811	-0.304887	0.595381	1.3942
12.8	2.75576	-0.645688	3.42856	-2.5536	1.2996	2.19403		12.8	3.72694	0.778585	5.68811	-0.364676	0.69253	1.17251
12.9	3.34037	-2.81504	3.61319	-3.54856	2.04096	0.285391		12.9	3.09992	0.828356	5.88534	-0.469995	0.777645	0.935561
13	3.62124	-4.06593	4.24818	-4.00798	2.5802	-1.59361		13	2.51785	0.773808	5.97585	-0.660201	0.856736	0.65145
13.1	3.46747	-4.04943	5.2862	-3.97593	2.89224	-2.94172		13.1	2.05973	0.61763	5.96812	-0.952177	0.946465	0.307045
13.2	2.91569	-2.86643	6.5842	-3.54674	2.97565	-3.46612		13.2	1.78212	0.385815	5.88888	-1.32966	1.06534	-0.0977313
13.3	2.09577	-1.0473	7.89964	-2.84586	2.83244	-3.21635		13.3	1.69698	0.12633	5.7758	-1.74771	1.21975	-0.555802
13.4	1.17632	0.686804	8.9081	-2.00844	2.47011	-2.5091		13.4	1.76678	-0.0905072	5.66799	-2.14863	1.39669	-1.05171
13.5	0.308851	1.75508	9.31924	-1.1805	1.91571	-1.73421		13.5	1.91986	-0.180613	5.59445	-2.48179	1.56576	-1.55249
13.6	-0.358135	1.96157	9.01496	-0.526362	1.23459	-1.17464		13.6	2.07544	-0.0658175	5.56749	-2.7188	1.68637	-1.99896
13.7	-0.668545	1.51087	8.0748	-0.227111	0.555199	-0.958634		13.7	2.17011	0.297684	5.58135	-2.85707	1.71862	-2.31058
13.8	-0.51107	0.820804	6.72915	-0.437749	0.0550504	-1.1053		13.8	2.17637	0.895654	5.61665	-2.91427	1.63574	-2.4102
13.9	0.142543	0.277943	5.29541	-1.17584	-0.075431	-1.54025		13.9	2.10365	1.64998	5.64535	-2.92133	1.43408	-2.25631
14	1.22465	0.0960325	4.06872	-2.27485	0.259075	-2.14257		14	1.98607	2.43884	5.63218	-2.91479	1.13832	-1.867
14.1	2.54102	0.343772	3.23816	-3.44595	0.967726	-2.81401		14.1	1.8674	3.13322	5.53659	-2.92973	0.796976	-1.317
14.2	3.78296	1.03625	2.86373	-4.40009	1.79388	-3.46025		14.2	1.78843	3.6373	5.31871	-2.99257	0.469922	-0.710318
14.3	4.62223	2.16962	2.88471	-4.96179	2.40034	-3.91249		14.3	1.7787	3.91476	4.95498	-3.11658	0.214289	-0.145275
14.4	4.82531	3.71219	3.19039	-5.10219	2.47092	-3.89255		14.4	1.85113	3.99046	4.45425	-3.29923	0.073852	0.31205
14.5	4.36518	5.53383	3.6642	-4.90431	1.84791	-3.10349		14.5	1.99829	3.93079	3.86347	-3.52066	0.0726399	0.637329
14.6	3.44675	7.35045	4.21336	-4.52091	0.631955	-1.40808		14.6	2.19463	3.81393	3.25907	-3.74093	0.210816	0.840685
14.7	2.38507	8.75756	4.73603	-4.12798	-0.848088	1.02257		14.7	2.40105	3.70424	2.7246	-3.89997	0.461428	0.955841
14.8	1.46864	9.36128	5.0623	-3.86476	-2.1356	3.67655		14.8	2.56985	3.64066	2.32251	-3.92933	0.769514	1.02897
14.9	0.898231	8.93804	4.95921	-3.8007	-2.82719	5.88388		14.9	2.65008	3.63787	2.07714	-3.77152	1.06103	1.10776
15	0.753268	7.52197	4.19567	-3.91418	-2.72749	7.09716		15	2.59937	3.69189	1.97256	-3.40132	1.25981	1.23398
15.1	1.011	5.40369	2.72472	-4.11663	-1.87564	7.09664		15.1	2.40083	3.78389	1.96093	-2.83719	1.30785	1.43685
15.2	1.54019	3.04202	0.806688	-4.28546	-0.471722	6.0403		15.2	2.07639	3.88149	1.97737	-2.13887	1.18563	1.72279
15.3	2.1435	0.947123	-1.02819	-4.2908	1.21398	4.35511		15.3	1.68966	3.93797	1.95598	-1.39284	0.926187	2.06353
15.4	2.66931	-0.475759	-2.2	-3.97166	2.90418	2.49842		15.4	1.33083	3.89768	1.84434	-0.689755	0.609018	2.39395
15.5	2.99803	-1.04391	-2.35688	-3.1414	4.31546	0.852346		15.5	1.08664	3.71179	1.6123	-0.101119	0.330782	2.62611
15.6	3.01206	-0.802992	-1.54009	-1.67489	5.16203	-0.29707		15.6	1.01281	3.36326	1.25579	0.335472	0.168636	2.67488
15.7	2.58863	0.0486321	-0.102656	0.407905	5.21484	-0.80311		15.7	1.11851	2.88503	0.798824	0.621114	0.152827	2.48909
15.8	1.67895	1.26217	1.46026	2.84731	4.34701	-0.668302		15.8	1.3657	2.35777	0.294646	0.79053	0.26187	2.0723
15.9	0.407802	2.60013	2.66608	5.19013	2.61054	-0.0114512		15.9	1.68384	1.88549	-0.175698	0.897213	0.437848	1.4841
16	-0.893225	3.82893	3.16419	6.90969	0.322609	0.948501		16	1.99221	1.55966	-0.519451	0.993111	0.609865	0.820548
16.1	-1.74919	4.67242	2.82687	7.58043	-1.9396	1.89999		16.1	2.222	1.42944	-0.66181	1.11137	0.71347	0.183792
16.2	-1.73486	4.84879	1.76621	7.04808	-3.54396	2.51377		16.2	2.33082	1.4916	-0.578349	1.26185	0.703723	-0.347097
16.3	-0.704522	4.19026	0.268796	5.4859	-4.09807	2.53854		16.3	2.30263	1.70109	-0.310298	1.43456	0.563105	-0.730473
16.4	1.13003	2.83259	-1.32465	3.29406	-3.60455	1.85171		16.4	2.1434	1.99088	0.0479815	1.60478	0.305326	-0.966682
16.5	3.2654	1.23149	-2.70621	0.991148	-2.40437	0.518009		16.5	1.87779	2.29018	0.383609	1.73895	-0.027886	-1.09515
16.6	5.10053	-0.0255352	-3.61182	-0.920625	-0.973452	-1.20147		16.6	1.54879	2.53849	0.600556	1.80032	-0.37627	-1.17965
16.7	6.16165	-0.506762	-3.80018	-2.10056	0.264128	-2.90229		16.7	1.21715	2.69122	0.643927	1.75628	-0.671479	-1.28672
16.8	6.25332	-0.135314	-3.11908	-2.48637	1.04865	-4.1837		16.8	0.95243	2.72178	0.509814	1.58535	-0.847852	-1.4686
16.9	5.44663	0.828207	-1.61342	-2.27504	1.28957	-4.78456		16.9	0.814213	2.62476	0.241853	1.28716	-0.857957	-1.75381
17	3.9934	2.00381	0.390651	-1.7326	1.04829	-4.67		17	0.827847	2.42146	-0.0859405	0.891754	-0.69157	-2.14181
17.1	2.1901	3.08557	2.35687	-1.03566	0.513687	-4.01897		17.1	0.969178	2.16182	-0.392119	0.457377	-0.38461	-2.60369
17.2	0.291182	3.88256	3.73387	-0.247593	-0.0668032	-3.16321		17.2	1.16909	1.91832	-0.606096	0.0561346	-0.00822514	-3.08931
17.3	-1.5033	4.28507	4.16559	0.605998	-0.502565	-2.4811		17.3	1.33764	1.7676	-0.678878	-0.244825	0.355109	-3.53632
17.4	-3.00445	4.27002	3.58544	1.4512	-0.707697	-2.23947		17.4	1.39765	1.7618	-0.58889	-0.404223	0.637365	-3.88213
17.5	-3.95895	3.85853	2.19756	2.0986	-0.671523	-2.4886		17.5	1.30902	1.90708	-0.347161	-0.419083	0.802275	-4.07962
17.6	-4.09241	3.11971	0.386164	2.28424	-0.387811	-3.10334		17.6	1.07583	2.16242	-0.00398408	-0.321813	0.848844	-4.11356
17.7	-3.2429	2.17953	-1.39115	1.84048	0.15083	-3.90011		17.7	0.736952	2.4575	0.35308	-0.164449	0.802336	-4.01001
17.8	-1.51743	1.21635	-2.74563	0.858539	0.888976	-4.69603		17.8	0.349363	2.71869	0.616933	-0.00094424	0.702724	-3.83061
17.9	0.667765	0.434869	-3.43882	-0.336336	1.67435	-5.33815		17.9	-0.0293911	2.88836	0.69458	0.120921	0.594327	-3.65168
18	2.69404	0.0506891	-3.36881	-1.33522	2.30048	-5.71703		18	-0.35263	2.93292	0.540709	0.161046	0.516773	-3.53973
18.1	3.99525	0.270342	-2.56194	-1.82225	2.57213	-5.74744		18.1	-0.589799	2.84538	0.174394	0.0900538	0.496981	-3.53234
18.2	4.28555	1.13302	-1.17641	-1.71862	2.39398	-5.36078		18.2	-0.728404	2.64372	-0.327572	-0.105074	0.546437	-3.63097
18.3	3.59384	2.44411	0.497582	-1.17324	1.83002	-4.55869		18.3	-0.775692	2.36563	-0.85417	-0.414481	0.662774	-3.80784
18.4	2.19751	3.83409	2.03382	-0.446972	1.05579	-3.47939		18.4	-0.763122	2.05906	-1.29208	-0.799366	0.833546	-4.01847
18.5	0.492362	4.88101	2.95101	0.188825	0.258024	-2.42332		18.5	-0.746089	1.77094	-1.55661	-1.19195	1.03734	-4.21299
18.6	-1.14239	5.26853	2.87207	0.504547	-0.403835	-1.73472		18.6	-0.79503	1.53685	-1.61379	-1.50907	1.2408	-4.34524
18.7	-2.44542	4.88812	1.71065	0.339115	-0.794471	-1.62826		18.7	-0.976616	1.37502	-1.48456	-1.67599	1.39926	-4.3813
18.8	-3.30496	3.84302	-0.258935	-0.353528	-0.804734	-2.11575		18.8	-1.33013	1.28446	-1.2316	-1.65165	1.46527	-4.3062
18.9	-3.74069	2.39448	-2.49349	-1.45447	-0.403262	-3.03759		18.9	-1.84693	1.24316	-0.939105	-1.44633	1.40295	-4.12638
19	-3.85958	0.856848	-4.36784	-2.71117	0.33818	-4.15775		19	-2.4658	1.20541	-0.692511	-1.12166	1.203	-3.86583
19.1	-3.80834	-0.457506	-5.36672	-3.80871	1.27003	-5.24639		19.1	-3.09199	1.11156	-0.561064	-0.767339	0.890245	-3.56172
19.2	-3.74527	-1.35312	-5.24694	-4.44445	2.2316	-6.06927		19.2	-3.62777	0.906423	-0.585336	-0.466443	0.518078	-3.2612
19.3	-3.80285	-1.77836	-4.11081	-4.38975	3.07676	-6.41023		19.3	-4.00305	0.559095	-0.76825	-0.26893	0.153336	-3.01737
19.4	-4.0749	-1.79998	-2.36328	-3.55046	3.60964	-6.14834		19.4	-4.19243	0.0770242	-1.07327	-0.181408	-0.142644	-2.87903
19.5	-4.6044	-1.53486	-0.548645	-1.97915	3.5827	-5.30905		19.5	-4.216	-0.491944	-1.43309	-0.17041	-0.331946	-2.87886
19.6	-5.34202	-1.10463	0.861532	0.0775057	2.79651	-4.06132		19.6	-4.12748	-1.07315	-1.76616	-0.175745	-0.409223	-3.02412
19.7	-6.09149	-0.651338	1.60355	2.15516	1.24104	-2.66013		19.7	-3.99685	-1.58758	-1.99656	-0.131374	-0.399575	-3.29316
19.8	-6.52563	-0.37142	1.63015	3.69716	-0.827042	-1.31821		19.8	-3.893	-1.97462	-2.07345	0.0127939	-0.347349	-3.63749
19.9	-6.35963	-0.462479	1.05819	4.30484	-2.92278	-0.19082		19.9	-3.86773	-2.20761	-1.98515	0.277444	-0.300724	-3.99047
20	-5.51446	-1.04322	0.0849622	3.942	-4.49681	0.55008		20	-3.94506	-2.29729	-1.76294	0.650518	-0.301285	-4.28118
20.1	-4.18221	-2.07048	-1.07573	2.91074	-5.14483	0.66583		20.1	-4.11866	-2.28164	-1.47288	1.09161	-0.380194	-4.45537
20.2	-2.72702	-3.3142	-2.23437	1.67671	-4.77363	-0.0716175		20.2	-4.35817	-2.21227	-1.19816	1.54164	-0.555453	-4.49255
20.3	-1.54307	-4.40392	-3.24484	0.691517	-3.62197	-1.73173		20.3	-4.61925	-2.14425	-1.01688	1.93169	-0.824692	-4.41033
20.4	-0.940555	-4.99237	-3.95153	0.248411	-2.10818	-4.0977		20.4	-4.84993	-2.1314	-0.981693	2.18969	-1.15736	-4.25599
20.5	-1.08438	-4.90224	-4.17568	0.400779	-0.640724	-6.68945		20.5	-4.99588	-2.22268	-1.10855	2.25198	-1.49321	-4.08894
20.6	-1.97515	-4.1853	-3.80063	0.996393	0.484585	-8.89127		20.6	-5.01369	-2.45751	-1.37494	2.08152	-1.75233	-3.96316
20.7	-3.42998	-3.10402	-2.86672	1.78788	1.1308	-10.1584		20.7	-4.88762	-2.85706	-1.72388	1.68793	-1.85713	-3.9186
20.8	-5.12296	-1.98202	-1.58913	2.53354	1.2605	-10.1885		20.8	-4.63687	-3.4169	-2.07866	1.1322	-1.75875	-3.97563
20.9	-6.69642	-1.0871	-0.315927	3.05416	0.890145	-9.03053		20.9	-4.30829	-4.10671	-2.3676	0.508637	-1.4564	-4.12824
21	-7.87455	-0.598994	0.559371	3.26075	0.0973455	-7.04224		21	-3.95932	-4.87943	-2.54757	-0.084109	-1.00113	-4.33894
21.1	-8.51336	-0.643721	0.718539	3.08029	-0.967413	-4.75056		21.1	-3.64096	-5.68768	-2.61184	-0.570431	-0.479986	-4.54197
21.2	-8.52594	-1.31631	0.0494796	2.40697	-2.07267	-2.6853		21.2	-3.38487	-6.50518	-2.58165	-0.916283	0.0131766	-4.65487
21.3	-7.82308	-2.65648	-1.29506	1.13631	-2.91295	-1.22144		21.3	-3.1967	-7.34285	-2.4959	-1.13301	0.405813	-4.59754
21.4	-6.39436	-4.64343	-2.92511	-0.742638	-3.16396	-0.521873		21.4	-3.05404	-8.25034	-2.40405	-1.26727	0.66346	-4.31558
21.5	-4.38239	-7.16379	-4.30175	-2.99386	-2.60867	-0.560744		21.5	-2.91155	-9.30259	-2.35733	-1.3814	0.792837	-3.8034
21.6	-2.09695	-9.97974	-4.9731	-5.14262	-1.25026	-1.16035		21.6	-2.71498	-10.5766	-2.39905	-1.53312	0.834185	-3.11404
21.7	0.0715433	-12.7699	-4.82707	-6.65851	0.64312	-2.04438		21.7	-2.41855	-12.1305	-2.55644	-1.7606	0.849719	-2.35102
21.8	1.75023	-15.2067	-4.13522	-7.16595	2.59477	-2.91601		21.8	-1.998	-13.9888	-2.83345	-2.07514	0.908261	-1.64118
21.9	2.68501	-17.0545	-3.32691	-6.59076	4.08578	-3.52306		21.9	-1.45635	-16.1381	-3.20391	-2.46209	1.06664	-1.09863
22	2.81052	-18.3015	-2.73156	-5.18797	4.76179	-3.65112		22	-0.821463	-18.5317	-3.61163	-2.88383	1.35423	-0.793306
22.1	2.25837	-19.2327	-2.49386	-3.43599	4.56664	-3.12311		22.1	-0.139085	-21.099	-3.98374	-3.284	1.7649	-0.735379
22.2	1.34072	-20.3295	-2.61411	-1.88156	3.73929	-1.89609		22.2	0.534063	-23.7567	-4.25372	-3.59476	2.25656	-0.881485
22.3	0.44721	-22.0737	-3.00641	-0.943882	2.68398	-0.184156		22.3	1.1388	-26.4182	-4.38339	-3.74551	2.75519	-1.15528
22.4	-0.0881866	-24.7624	-3.57603	-0.791282	1.83372	1.56077		22.4	1.62002	-29.0068	-4.37822	-3.68119	3.16709	-1.47139
22.5	-0.0837437	-28.3978	-4.26484	-1.3337	1.52458	2.78278		22.5	1.93353	-31.4711	-4.2852	-3.38646	3.39995	-1.75755
22.6	0.452967	-32.6782	-5.02494	-2.29306	1.88536	3.03687		22.6	2.05472	-33.7958	-4.17011	-2.89914	3.38647	-1.96953
22.7	1.33352	-37.1376	-5.73845	-3.31738	2.78985	2.18101		22.7	1.98758	-36.0012	-4.09034	-2.30381	3.1037	-2.09585
22.8	2.27968	-41.3349	-6.21274	-4.08922	3.92156	0.439984		22.8	1.76738	-38.1323	-4.07926	-1.70739	2.57969	-2.15369
22.9	3.0745	-44.9608	-6.2764	-4.39586	4.90874	-1.70054		22.9	1.45274	-40.2395	-4.14619	-1.20604	1.88459	-2.18446
23	3.62043	-47.8368	-5.88474	-4.14671	5.4452	-3.70524		23	1.11222	-42.357	-4.28749	-0.857339	1.10944	-2.24802
23.1	3.88613	-49.8889	-5.12956	-3.30534	5.31275	-5.17641		23.1	0.804849	-44.4874	-4.49861	-0.668235	0.340028	-2.40889
23.2	3.79846	-51.1698	-4.21373	-1.90036	4.39374	-5.93451		23.2	0.561649	-46.597	-4.78078	-0.602913	-0.365049	-2.71686
23.3	3.23273	-51.8734	-3.3918	-0.132327	2.70832	-6.0251		23.3	0.377225	-48.6215	-5.13487	-0.604009	-0.988061	-3.18961
23.4	2.13172	-52.2887	-2.87059	1.62602	0.413972	-5.64814		23.4	0.213495	-50.4819	-5.55027	-0.61372	-1.5526	-3.80266
23.5	0.608875	-52.7	-2.7791	2.95454	-2.21229	-5.0634		23.5	0.0135173	-52.1088	-5.99852	-0.58889	-2.1089	-4.49412
23.6	-1.05842	-53.2832	-3.13851	3.54839	-4.82242	-4.50639		23.6	-0.277311	-53.462	-6.43781	-0.507381	-2.71064	-5.18178
23.7	-2.53837	-54.1229	-3.86938	3.335	-7.05503	-4.17424		23.7	-0.691679	-54.5386	-6.8292	-0.368023	-3.39228	-5.78652
23.8	-3.53056	-55.2303	-4.89598	2.49196	-8.61082	-4.20361		23.8	-1.23366	-55.371	-7.15426	-0.18831	-4.15545	-6.2507
23.9	-3.88451	-56.5461	-6.20321	1.33322	-9.34073	-4.63077		23.9	-1.88499	-56.0161	-7.4224	0.000517857	-4.96908	-6.54733
24	-3.68719	-57.9377	-7.80328	0.166591	-9.30232	-5.41974		24	-2.61524	-56.544	-7.66783	0.153951	-5.77795	-6.68165
24.1	-3.22339	-59.1785	-9.59559	-0.809917	-8.75749	-6.47595		24.1	-3.38562	-57.0254	-7.9395	0.217255	-6.51737	-6.68501
24.2	-2.86715	-60.0237	-11.3265	-1.49879	-8.07251	-7.63908		24.2	-4.14578	-57.5152	-8.28447	0.137905	-7.12802	-6.60368
24.3	-2.94666	-60.3355	-12.6453	-1.87095	-7.57175	-8.71797		24.3	-4.83547	-58.0412	-8.73218	-0.118173	-7.56386	-6.48695
24.4	-3.61056	-60.1424	-13.2064	-1.93173	-7.43985	-9.50921		24.4	-5.39558	-58.6028	-9.28307	-0.551888	-7.79703	-6.37795
24.5	-4.76457	-59.6381	-12.8664	-1.72014	-7.6662	-9.84054		24.5	-5.78528	-59.1782	-9.90817	-1.12544	-7.82202	-6.3077
24.6	-6.13912	-59.1118	-11.8025	-1.34074	-8.06524	-9.59168		24.6	-5.99696	-59.7319	-10.5634	-1.77025	-7.65829	-6.29184
24.7	-7.45225	-58.8022	-10.4431	-0.936637	-8.38655	-8.74796		24.7	-6.0631	-60.2202	-11.2039	-2.40639	-7.35057	-6.32913
24.8	-8.52812	-58.864	-9.30185	-0.696973	-8.43792	-7.45982		24.8	-6.0481	-60.5965	-11.7939	-2.96368	-6.96368	-6.40106
24.9	-9.29799	-59.3532	-8.83215	-0.824189	-8.17651	-5.99158		24.9	-6.02663	-60.8181	-12.3089	-3.39657	-6.56849	-6.47041
25	-9.68999	-60.1992	-9.2562	-1.48127	-7.67266	-4.64246		25	-6.05942	-60.8593	-12.7393	-3.68961	-6.22183	-6.487
25.1	-9.59302	-61.2316	-10.4817	-2.72731	-6.99534	-3.66376		25.1	-6.17582	-60.7214	-13.0928	-3.85465	-5.94947	-6.40286
25.2	-8.91299	-62.2476	-12.1442	-4.41861	-6.17615	-3.21046		25.2	-6.36788	-60.4347	-13.3974	-3.9218	-5.74147	-6.19144
25.3	-7.68328	-63.0651	-13.7653	-6.20204	-5.2472	-3.31203		25.3	-6.59895	-60.0515	-13.7031	-3.92769	-5.56046	-5.86155
25.4	-6.13706	-63.5356	-15.0077	-7.62669	-4.27174	-3.90472		25.4	-6.82183	-59.6307	-14.0739	-3.90522	-5.35938	-5.45767
25.5	-4.65493	-63.5314	-15.7855	-8.32249	-3.37953	-4.83746		25.5	-6.99406	-59.221	-14.5688	-3.87868	-5.10268	-5.04906
25.6	-3.62943	-62.9422	-16.2334	-8.14066	-2.76354	-5.85357		25.6	-7.08494	-58.85	-15.2215	-3.86325	-4.77874	-4.71247
25.7	-3.32215	-61.7057	-16.558	-7.19249	-2.58409	-6.5988		25.7	-7.07674	-58.5167	-16.0239	-3.86279	-4.39943	-4.51002
25.8	-3.78083	-59.8795	-16.9114	-5.79173	-2.86428	-6.75782		25.8	-6.96582	-58.1907	-16.922	-3.86597	-3.99025	-4.4719
25.9	-4.84596	-57.6794	-17.3358	-4.30432	-3.44248	-6.20884		25.9	-6.76683	-57.8263	-17.828	-3.84116	-3.58094	-4.58964
26	-6.21172	-55.4616	-17.8239	-3.01259	-4.03571	-5.12371		26	-6.51575	-57.3804	-18.6453	-3.7375	-3.20075	-4.81921
26.1	-7.53883	-53.627	-18.4044	-2.03183	-4.3626	-3.90116		26.1	-6.26964	-56.8263	-19.2988	-3.49737	-2.87802	-5.09162
26.2	-8.55346	-52.485	-19.1697	-1.33822	-4.24789	-2.9746		26.2	-6.09696	-56.1572	-19.7557	-3.07551	-2.64037	-5.32972
26.3	-9.06707	-52.147	-20.2156	-0.889447	-3.70133	-2.64529		26.3	-6.05827	-55.382	-20.0269	-2.46025	-2.51173	-5.46474
26.4	-8.99714	-52.4948	-21.5382	-0.674365	-2.87955	-3.0259		26.4	-6.18322	-54.5195	-20.1517	-1.68632	-2.506	-5.4526
26.5	-8.3888	-53.1975	-22.9434	-0.689185	-1.9897	-4.01824		26.5	-6.45483	-53.5983	-20.1797	-0.829633	-2.61923	-5.28815
26.6	-7.4123	-53.8121	-24.0998	-0.878322	-1.22051	-5.34349		26.6	-6.81052	-52.6591	-20.1573	0.0144794	-2.8242	-5.01286
26.7	-6.30707	-54.0036	-24.6574	-1.05943	-0.714414	-6.64397		26.7	-7.16251	-51.7529	-20.1232	0.761023	-3.07242	-4.7079
26.8	-5.3248	-53.6524	-24.3761	-0.965068	-0.531989	-7.56653		26.8	-7.42739	-50.9318	-20.1066	1.35838	-3.30475	-4.47133
26.9	-4.72907	-52.8273	-23.2533	-0.336482	-0.689816	-7.84139		26.9	-7.54894	-50.2288	-20.1223	1.7971	-3.46862	-4.38554
27	-4.74775	-51.6907	-21.5335	0.969687	-1.2072	-7.35981		27	-7.50597	-49.6393	-20.1623	2.10287	-3.53458	-4.49051
27.1	-5.47921	-50.3562	-19.6179	2.83265	-2.08478	-6.19996		27.1	-7.3099	-49.1151	-20.1906	2.31995	-3.50443	-4.77461
27.2	-6.77916	-48.8689	-17.9078	4.83431	-3.28215	-4.6312		27.2	-6.99772	-48.5795	-20.1459	2.49798	-3.40514	-5.18358
27.3	-8.24681	-47.2827	-16.709	6.42308	-4.68845	-3.05789		27.3	-6.6213	-47.9558	-19.9547	2.682	-3.27514	-5.63966
27.4	-9.36891	-45.7385	-16.1772	7.15741	-6.06861	-1.91883		27.4	-6.23601	-47.1969	-19.5558	2.90514	-3.1508	-6.0666
27.5	-9.76467	-44.4751	-16.3309	6.89952	-7.08402	-1.57345		27.5	-5.89133	-46.3021	-18.9266	3.18333	-3.05766	-6.40973
27.6	-9.34884	-43.7209	-17.0541	5.85074	-7.39196	-2.18719		27.6	-5.62501	-45.3114	-18.1002	3.50906	-3.00581	-6.64379
27.7	-8.27808	-43.51	-18.0904	4.44571	-6.82163	-3.66529		27.7	-5.46089	-44.2862	-17.166	3.85113	-2.99203	-6.77423
27.8	-6.8084	-43.6055	-19.0847	3.16625	-5.48383	-5.68557		27.8	-5.40137	-43.2862	-16.2448	4.15981	-3.00372	-6.83497
27.9	-5.22024	-43.5736	-19.6513	2.35207	-3.73537	-7.8043		27.9	-5.41909	-42.3538	-15.4522	4.37489	-3.0218	-6.8806
28	-3.75998	-43.042	-19.455	2.13703	-2.01331	-9.59779		28	-5.45533	-41.5094	-14.8645	4.44112	-3.02113	-6.97284
28.1	-2.59798	-41.8917	-18.2877	2.45405	-0.669641	-10.7793		28.1	-5.43507	-40.7565	-14.5006	4.32796	-2.96851	-7.16305
28.2	-1.83892	-40.2959	-16.1632	3.10417	0.124147	-11.2762		28.2	-5.29536	-40.0854	-14.3229	4.04121	-2.82394	-7.47612
28.3	-1.55266	-38.6002	-13.4019	3.85092	0.362756	-11.1768		28.3	-5.01242	-39.4755	-14.2573	3.62042	-2.55493	-7.90148
28.4	-1.77963	-37.1627	-10.6088	4.47792	0.167082	-10.6231		28.4	-4.61285	-38.8925	-14.2176	3.1254	-2.15748	-8.39552
28.5	-2.53476	-36.2227	-8.49562	4.85014	-0.297643	-9.78392		28.5	-4.16477	-38.2878	-14.1299	2.61569	-1.67015	-8.89301
28.6	-3.71737	-35.8284	-7.59313	4.91105	-0.888672	-8.87406		28.6	-3.7581	-37.6077	-13.9513	2.13339	-1.16955	-9.32036
28.7	-5.04896	-35.8389	-8.05847	4.6262	-1.51443	-8.13543		28.7	-3.482	-36.8124	-13.6796	1.69525	-0.746399	-9.6096
28.8	-6.09526	-36.0028	-9.62798	3.95848	-2.07342	-7.76801		28.8	-3.40037	-35.8963	-13.3516	1.29682	-0.474018	-9.71298
28.9	-6.43473	-36.0694	-11.72	2.91057	-2.38771	-7.86479		28.9	-3.53499	-34.8921	-13.0344	0.922462	-0.384028	-9.61549
29	-5.87175	-35.8737	-13.6895	1.54834	-2.23064	-8.38011		29	-3.86012	-33.8568	-12.8085	0.554453	-0.459608	-9.34212
29.1	-4.55884	-35.3697	-15.0618	0.00402836	-1.49543	-9.14996		29.1	-4.30917	-32.8498	-12.7499	0.177573	-0.647494	-8.95626
29.2	-2.97201	-34.5653	-15.655	-1.51593	-0.327388	-9.97216		29.2	-4.79288	-31.9154	-12.9116	-0.220778	-0.876701	-8.54754
29.3	-1.73159	-33.4408	-15.5635	-2.81428	0.892506	-10.6445		29.3	-5.22173	-31.0752	-13.3073	-0.649393	-1.07764	-8.21178
29.4	-1.36469	-31.9485	-15.0553	-3.75343	1.68863	-10.9301		29.4	-5.52411	-30.3279	-13.9003	-1.11343	-1.19403	-8.02631
29.5	-2.11466	-30.0854	-14.4649	-4.28202	1.70975	-10.6027		29.5	-5.66061	-29.6553	-14.6065	-1.61467	-1.18802	-8.02711
29.6	-3.83247	-27.9985	-14.0757	-4.42127	0.895097	-9.56182		29.6	-5.63262	-29.0313	-15.3133	-2.1476	-1.04036	-8.20013
29.7	-6.04855	-25.971	-14.0621	-4.22707	-0.483474	-7.94053		29.7	-5.48637	-28.4328	-15.9079	-2.69218	-0.752919	-8.48843
29.8	-8.12527	-24.2916	-14.4473	-3.80211	-1.95451	-6.13181		29.8	-5.30869	-27.8447	-16.3089	-3.21054	-0.351701	-8.81194
29.9	-9.47268	-23.177	-15.1674	-3.30279	-3.06991	-4.71671		29.9	-5.21089	-27.2588	-16.4859	-3.65182	0.111427	-9.09256
30	-9.77579	-22.7161	-16.1511	-2.92105	-3.53376	-4.22846		30	-5.2984	-26.6722	-16.4632	-3.96337	0.564726	-9.27406
30.1	-9.06995	-22.8782	-17.3357	-2.80854	-3.24889	-4.91506		30.1	-5.63531	-26.09	-16.307	-4.10925	0.933235	-9.33048
30.2	-7.67537	-23.519	-18.5755	-3.03842	-2.27618	-6.63104		30.2	-6.21684	-25.5314	-16.1008	-4.08719	1.16242	-9.26633
30.3	-6.03781	-24.3944	-19.5997	-3.61006	-0.7865	-8.8876		30.3	-6.96427	-25.0332	-15.9172	-3.93581	1.23929	-9.11379
30.4	-4.57314	-25.2308	-20.0729	-4.43365	0.995763	-11.0768		30.4	-7.74767	-24.6443	-15.7962	-3.72544	1.20063	-8.92348
30.5	-3.60893	-25.8273	-19.7369	-5.29945	2.81302	-12.669		30.5	-8.43107	-24.4116	-15.7382	-3.53693	1.12237	-8.75236
30.6	-3.4143	-26.0716	-18.5376	-5.90147	4.433	-13.3645		30.6	-8.9189	-24.3627	-15.7122	-3.43874	1.09302	-8.65503
30.7	-4.20907	-25.914	-16.6985	-5.95343	5.64254	-13.1507		30.7	-9.18478	-24.4939	-15.6741	-3.46939	1.18336	-8.67234
30.8	-6.04646	-25.3971	-14.6752	-5.29234	6.21064	-12.2355		30.8	-9.27204	-24.7629	-15.5824	-3.62964	1.42502	-8.816
30.9	-8.6995	-24.6678	-13	-3.99584	5.93728	-10.9312		30.9	-9.26843	-25.0943	-15.4036	-3.8869	1.80077	-9.05774
31	-11.6177	-23.9453	-12.0578	-2.43931	4.78873	-9.55402		31	-9.26926	-25.3979	-15.1123	-4.18983	2.24899	-9.33241
31.1	-14.0709	-23.4785	-11.9335	-1.17987	2.99539	-8.33703		31.1	-9.34512	-25.5944	-14.6949	-4.48506	2.68022	-9.55688
31.2	-15.4326	-23.4739	-12.4084	-0.705869	1.05247	-7.36727		31.2	-9.52455	-25.637	-14.159	-4.72875	3.00337	-9.65905
31.3	-15.4502	-24.0431	-13.0901	-1.21656	-0.435391	-6.65276		31.3	-9.79657	-25.5215	-13.5449	-4.89415	3.15136	-9.60185
31.4	-14.3417	-25.1407	-13.6198	-2.55787	-0.982318	-6.28596		31.4	-10.1232	-25.2819	-12.9256	-4.97693	3.09671	-9.39511
31.5	-12.6453	-26.5211	-13.7999	-4.32311	-0.418787	-6.42606		31.5	-10.4513	-24.9765	-12.3895	-4.99657	2.84925	-9.08677
31.6	-10.956	-27.7508	-13.6089	-6.02712	1.03835	-7.15902		31.6	-10.7185	-24.6713	-12.011	-4.99205	2.4447	-8.74026
31.7	-9.71433	-28.3499	-13.1109	-7.2944	2.85401	-8.33798		31.7	-10.8577	-24.4209	-11.8237	-5.01532	1.93639	-8.41164
31.8	-9.0841	-28.0398	-12.3838	-7.95833	4.37083	-9.58443		31.8	-10.8065	-24.2536	-11.811	-5.12028	1.39367	-8.13621
31.9	-8.96497	-26.8584	-11.4795	-8.05742	5.05479	-10.4471		31.9	-10.5255	-24.1665	-11.9176	-5.34439	0.89708	-7.92723
32	-9.08823	-25.1182	-10.4894	-7.75263	4.7069	-10.6245		32	-10.0147	-24.1294	-12.0739	-5.69024	0.523438	-7.78079
32.1	-9.19737	-23.2684	-9.63304	-7.24544	3.51172	-10.1043		32.1	-9.31772	-24.0939	-12.2191	-6.11824	0.322329	-7.68642
32.2	-9.1613	-21.7531	-9.20921	-6.70679	1.88396	-9.15455		32.2	-8.50995	-24.0031	-12.3135	-6.55648	0.294813	-7.63528
32.3	-8.99191	-20.8801	-9.42448	-6.23541	0.226083	-8.12272		32.3	-7.67582	-23.8016	-12.3412	-6.92241	0.386438	-7.61656
32.4	-8.75176	-20.7263	-10.2637	-5.87645	-1.23471	-7.26002		32.4	-6.88522	-23.449	-12.3047	-7.14754	0.500855	-7.60845
32.5	-8.41293	-21.1395	-11.4909	-5.688	-2.43059	-6.64889		32.5	-6.18007	-22.9347	-12.2213	-7.19908	0.529419	-7.57463
32.6	-7.82882	-21.8237	-12.7839	-5.78018	-3.28901	-6.2489		32.6	-5.57241	-22.2863	-12.1208	-7.08916	0.388412	-7.47318
32.7	-6.84164	-22.4646	-13.8698	-6.24911	-3.65334	-6.00144		32.7	-5.05282	-21.5624	-12.0424	-6.86751	0.0492874	-7.27328
32.8	-5.38746	-22.8481	-14.5915	-7.05932	-3.35651	-5.84755		32.8	-4.60311	-20.8328	-12.0311	-6.60143	-0.451674	-6.97196
32.9	-3.58314	-22.8707	-14.8752	-7.98195	-2.36639	-5.76297		32.9	-4.2078	-20.1585	-12.1272	-6.35297	-1.0314	-6.59861
33	-1.71819	-22.4994	-14.6962	-8.66656	-0.90317	-5.78329		33	-3.85623	-19.5771	-12.3524	-6.16115	-1.59373	-6.20805
33.1	-0.161392	-21.7151	-14.0899	-8.77876	0.575307	-5.9678		33.1	-3.53847	-19.0956	-12.6963	-6.03505	-2.06021	-5.86549
33.2	0.794902	-20.5276	-13.1795	-8.15037	1.52631	-6.28806		33.2	-3.24315	-18.6904	-13.1124	-5.95956	-2.38531	-5.63244
33.3	1.03137	-19.007	-12.1916	-6.90315	1.52393	-6.58411		33.3	-2.95991	-18.3198	-13.5261	-5.90911	-2.55451	-5.55472
33.4	0.615959	-17.3276	-11.4024	-5.42592	0.456897	-6.61343		33.4	-2.68541	-17.9393	-13.8554	-5.85523	-2.5765	-5.65496
33.5	-0.251007	-15.7328	-11.0508	-4.19023	-1.39429	-6.18609		33.5	-2.42965	-17.5136	-14.0367	-5.76447	-2.48143	-5.93042
33.6	-1.31995	-14.456	-11.2863	-3.53409	-3.46156	-5.32467		33.6	-2.217	-17.0241	-14.0401	-5.59454	-2.32501	-6.35198
33.7	-2.3679	-13.6542	-12.1233	-3.52871	-5.14846	-4.27747		33.7	-2.08297	-16.4692	-13.872	-5.29998	-2.18709	-6.87088
33.8	-3.2208	-13.385	-13.4614	-3.98459	-6.04784	-3.46484		33.8	-2.06504	-15.8611	-13.5712	-4.84932	-2.15808	-7.43011
33.9	-3.7593	-13.5672	-15.0567	-4.56312	-6.04616	-3.33109		33.9	-2.19045	-15.2244	-13.2005	-4.24674	-2.31373	-7.97565
34	-3.97147	-13.9916	-16.4982	-4.95193	-5.30071	-4.1608		34	-2.46492	-14.5983	-12.8361	-3.54381	-2.68819	-8.46672
34.1	-3.93674	-14.4274	-17.2957	-5.01884	-4.11115	-5.93876		34.1	-2.86531	-14.0354	-12.5527	-2.83013	-3.25838	-8.88666
34.2	-3.74637	-14.6704	-17.0893	-4.77206	-2.80436	-8.35309		34.2	-3.34146	-13.5938	-12.4052	-2.20201	-3.9482	-9.25118
34.3	-3.48086	-14.5863	-15.8666	-4.23725	-1.6728	-10.9317		34.3	-3.82899	-13.3235	-12.4131	-1.72616	-4.65117	-9.60894
34.4	-3.22667	-14.144	-13.9267	-3.36024	-0.994171	-13.1679		34.4	-4.26487	-13.2565	-12.5537	-1.41913	-5.26449	-10.0293
34.5	-3.10896	-13.4141	-11.7343	-2.05193	-1.01183	-14.6689		34.5	-4.60211	-13.397	-12.7676	-1.25228	-5.72027	-10.5759
34.6	-3.27825	-12.5322	-9.76128	-0.320719	-1.87335	-15.2697		34.6	-4.81951	-13.7175	-12.9739	-1.1743	-5.99987	-11.2782
34.7	-3.85023	-11.6763	-8.39451	1.57742	-3.54922	-15.0576		34.7	-4.92392	-14.1596	-13.0882	-1.13424	-6.12912	-12.109
34.8	-4.82745	-11.0715	-7.89502	3.17102	-5.79041	-14.3159		34.8	-4.94705	-14.6473	-13.0421	-1.09546	-6.15902	-12.9859
34.9	-6.01158	-10.9588	-8.36143	3.9822	-8.16703	-13.4271		34.9	-4.93584	-15.1077	-12.8029	-1.0385	-6.14302	-13.7965
35	-7.06319	-11.4992	-9.685	3.77488	-10.203	-12.7809		35	-4.94071	-15.4907	-12.3887	-0.955616	-6.12387	-14.4372
35.1	-7.67211	-12.7332	-11.5364	2.66355	-11.4935	-12.6954		35.1	-5.00619	-15.779	-11.8682	-0.848152	-6.12925	-14.8443
35.2	-7.66099	-14.5922	-13.4406	1.02927	-11.8209	-13.3319		35.2	-5.16597	-15.9875	-11.3377	-0.731651	-6.17338	-15.0056
35.3	-7.05299	-16.8451	-14.9235	-0.697756	-11.2098	-14.6177		35.3	-5.44024	-16.1511	-10.8904	-0.645295	-6.25585	-14.9575
35.4	-6.06364	-19.1026	-15.6296	-2.20295	-9.90152	-16.2155		35.4	-5.83076	-16.311	-10.5889	-0.653884	-6.3585	-14.7694
35.5	-4.99584	-20.9016	-15.4043	-3.3036	-8.24521	-17.5896		35.5	-6.31538	-16.5025	-10.452	-0.833209	-6.44463	-14.5214
35.6	-4.15257	-21.8581	-14.2738	-3.90387	-6.55441	-18.2384		35.6	-6.84694	-16.7444	-10.4557	-1.24004	-6.46323	-14.2829
35.7	-3.78084	-21.8185	-12.4317	-3.98353	-5.02879	-17.9399		35.7	-7.35971	-17.0292	-10.5423	-1.88227	-6.35992	-14.096
35.8	-4.01949	-20.9374	-10.2539	-3.60989	-3.78553	-16.8312		35.8	-7.78601	-17.3232	-10.6352	-2.70432	-6.09362	-13.969
35.9	-4.85963	-19.5724	-8.24049	-2.94518	-2.89588	-15.2743		35.9	-8.07831	-17.5734	-10.6589	-3.60085	-5.65191	-13.8766
36	-6.197	-18.1305	-6.84893	-2.25673	-2.42303	-13.6736		36	-8.22441	-17.7201	-10.562	-4.44982	-5.05973	-13.7658
36.1	-7.88937	-16.9245	-6.32272	-1.89219	-2.39602	-12.3504		36.1	-8.25049	-17.7068	-10.3336	-5.1466	-4.37826	-13.565
36.2	-9.74774	-16.1324	-6.60797	-2.19795	-2.75696	-11.4699		36.2	-8.20959	-17.4911	-10.0054	-5.62476	-3.69295	-13.1992
36.3	-11.5168	-15.7883	-7.43389	-3.36924	-3.33753	-11.0539		36.3	-8.16272	-17.0595	-9.63895	-5.86316	-3.09069	-12.6163
36.4	-12.8867	-15.7878	-8.4585	-5.33873	-3.8654	-11.0035		36.4	-8.15973	-16.4421	-9.30449	-5.88614	-2.63729	-11.8118
36.5	-13.5446	-15.9144	-9.36597	-7.74688	-4.03416	-11.1395		36.5	-8.22553	-15.7152	-9.06614	-5.75591	-2.36435	-10.8388
36.6	-13.2586	-15.9562	-9.94049	-9.99267	-3.63992	-11.2671		36.6	-8.3551	-14.9857	-8.97287	-5.55635	-2.26781	-9.79186
36.7	-12.0323	-15.7522	-10.0893	-11.4661	-2.69393	-11.2102		36.7	-8.51635	-14.3584	-9.05225	-5.37216	-2.31338	-8.77378
36.8	-10.1558	-15.2276	-9.88809	-11.769	-1.42636	-10.8129		36.8	-8.66011	-13.9064	-9.30511	-5.27134	-2.44682	-7.86429
36.9	-8.10445	-14.3668	-9.5575	-10.8159	-0.235922	-9.91709		36.9	-8.73203	-13.6522	-9.70253	-5.29348	-2.60403	-7.10199
37	-6.3577	-13.1783	-9.3451	-8.82645	0.440381	-8.40012		37	-8.6825	-13.5681	-10.1885	-5.4425	-2.72176	-6.48351
37.1	-5.26673	-11.7652	-9.39945	-6.25576	0.336965	-6.30532		37.1	-8.47491	-13.591	-10.6908	-5.68462	-2.74823	-5.977
37.2	-4.94511	-10.4043	-9.71854	-3.69428	-0.537359	-3.91313		37.2	-8.09363	-13.644	-11.1364	-5.95457	-2.65203	-5.53863
37.3	-5.27112	-9.50159	-10.2218	-1.68989	-1.91445	-1.69789		37.3	-7.55399	-13.6582	-11.4667	-6.16732	-2.42915	-5.12509
37.4	-5.98347	-9.41632	-10.8462	-0.591077	-3.38759	-0.14159		37.4	-6.90874	-13.5909	-11.6508	-6.23622	-2.10812	-4.70137
37.5	-6.76077	-10.2741	-11.6033	-0.47868	-4.56031	0.476104		37.5	-6.24572	-13.4326	-11.6923	-6.09916	-1.74635	-4.24584
37.6	-7.30356	-11.8885	-12.5392	-1.23114	-5.16426	0.187093		37.6	-5.66932	-13.2004	-11.6266	-5.73907	-1.41476	-3.75242
37.7	-7.4196	-13.8093	-13.605	-2.63317	-5.09561	-0.71447		37.7	-5.26806	-12.9288	-11.5058	-5.19224	-1.17659	-3.23241
37.8	-7.04744	-15.495	-14.5838	-4.42559	-4.39744	-1.83634		37.8	-5.08446	-12.6637	-11.3777	-4.54372	-1.06442	-2.71596
37.9	-6.21874	-16.5215	-15.1473	-6.31389	-3.20706	-2.85923		37.9	-5.10219	-12.4627	-11.2726	-3.90621	-1.06514	-2.25255
38	-5.03501	-16.6895	-15.0092	-7.95838	-1.70209	-3.6016		38	-5.2514	-12.3887	-11.2021	-3.38657	-1.12518	-1.90366
38.1	-3.71282	-16.0277	-14.0731	-8.95549	-0.0763411	-3.97315		38.1	-5.43192	-12.4907	-11.1669	-3.04976	-1.17195	-1.72773
38.2	-2.57533	-14.7718	-12.4958	-8.91825	1.4233	-3.93632		38.2	-5.54487	-12.7804	-11.1591	-2.90162	-1.14015	-1.75884
38.3	-1.98727	-13.2636	-10.6468	-7.6627	2.51017	-3.52314		38.3	-5.52163	-13.2209	-11.1595	-2.89549	-0.993555	-1.9917
38.4	-2.23353	-11.8054	-8.97185	-5.34447	2.94304	-2.82213		38.4	-5.34073	-13.7326	-11.1321	-2.95355	-0.734519	-2.38161
38.5	-3.33434	-10.6103	-7.83404	-2.47298	2.62257	-1.97256		38.5	-5.02838	-14.2167	-11.0244	-2.99209	-0.398708	-2.86031
38.6	-4.98324	-9.85942	-7.38062	0.208992	1.67103	-1.13754		38.6	-4.64481	-14.5845	-10.7797	-2.94046	-0.0412146	-3.35892
38.7	-6.65908	-9.76167	-7.55743	2.01124	0.427988	-0.522092		38.7	-4.2641	-14.7818	-10.3612	-2.75262	0.279878	-3.82501
38.8	-7.80345	-10.5082	-8.20136	2.578	-0.683652	-0.374154		38.8	-3.95386	-14.8004	-9.77379	-2.41318	0.516043	-4.2299
38.9	-8.01397	-12.1375	-9.12057	2.03146	-1.3324	-0.922422		38.9	-3.76143	-14.6739	-9.07134	-1.93909	0.633543	-4.56985
39	-7.19121	-14.4274	-10.0897	0.828569	-1.37393	-2.22677		39	-3.70429	-14.4637	-8.34222	-1.38039	0.614605	-4.86273
39.1	-5.58833	-16.9045	-10.8524	-0.48686	-0.895435	-4.10018		39.1	-3.7643	-14.2385	-7.68214	-0.815439	0.461062	-5.13914
39.2	-3.68549	-18.9732	-11.1377	-1.46567	-0.156697	-6.15233		39.2	-3.88559	-14.0566	-7.16383	-0.339439	0.197344	-5.43005
39.3	-1.99359	-20.1172	-10.7078	-1.88638	0.544519	-7.95078		39.3	-3.9833	-13.9584	-6.81607	-0.0462331	-0.131794	-5.75751
39.4	-0.898868	-20.0621	-9.44508	-1.75551	0.981782	-9.1908		39.4	-3.96715	-13.9634	-6.62115	-0.00611617	-0.469617	-6.13035
39.5	-0.575525	-18.8501	-7.46911	-1.23219	1.06113	-9.75997		39.5	-3.77083	-14.0695	-6.53303	-0.244362	-0.756633	-6.54606
39.6	-0.944647	-16.8379	-5.16188	-0.543521	0.807738	-9.74232		39.6	-3.37491	-14.2513	-6.50083	-0.732371	-0.941121	-6.99035
39.7	-1.76363	-14.538	-3.06756	0.101136	0.295423	-9.38082		39.7	-2.81537	-14.4595	-6.48326	-1.39631	-0.990925	-7.4362
39.8	-2.74146	-12.4539	-1.67818	0.54256	-0.398287	-8.95206		39.8	-2.17337	-14.6256	-6.4511	-2.14284	-0.9041	-7.84356
39.9	-3.59551	-10.9436	-1.27445	0.68586	-1.18694	-8.63526		39.9	-1.54962	-14.6748	-6.38482	-2.88549	-0.71422	-8.1626
40	-4.04913	-10.1717	-1.83546	0.429292	-1.97304	-8.46868		40	-1.035	-14.5456	-6.27377	-3.56217	-0.483342	-8.34099
40.1	-3.89463	-10.1354	-3.05996	-0.359964	-2.6523	-8.38884		40.1	-0.690196	-14.2109	-6.11921	-4.14414	-0.283188	-8.33652
40.2	-3.05979	-10.6954	-4.52027	-1.79099	-3.12042	-8.31089		40.2	-0.538225	-13.6909	-5.93853	-4.63329	-0.171579	-8.12866
40.3	-1.64579	-11.663	-5.88259	-3.84119	-3.20824	-8.20461		40.3	-0.565388	-13.0521	-5.76795	-5.05234	-0.172909	-7.72476
40.4	0.0715331	-12.8528	-7.01002	-6.28492	-2.70831	-8.07503		40.4	-0.728767	-12.3911	-5.65845	-5.43205	-0.271415	-7.16218
40.5	1.70876	-14.0474	-7.90265	-8.70899	-1.53031	-7.95355		40.5	-0.969471	-11.8079	-5.66306	-5.79993	-0.417695	-6.50381
40.6	2.89999	-14.9614	-8.57389	-10.6594	0.14362	-7.84768		40.6	-1.22527	-11.3779	-5.81708	-6.17251	-0.54382	-5.8223
40.7	3.41253	-15.2632	-8.96293	-11.7966	1.85403	-7.65039		40.7	-1.4404	-11.1331	-6.12062	-6.55411	-0.584195	-5.18037
40.8	3.16018	-14.709	-8.96459	-11.9903	3.0295	-7.13276		40.8	-1.57621	-11.0571	-6.53262	-6.93943	-0.497092	-4.61751
40.9	2.17625	-13.2839	-8.51019	-11.3592	3.24593	-6.07633		40.9	-1.6217	-11.0951	-6.98139	-7.31076	-0.275358	-4.14837
41	0.589911	-11.2773	-7.63616	-10.2019	2.44187	-4.41729		41	-1.59516	-11.1725	-7.38814	-7.63339	0.0577653	-3.7704
41.1	-1.36064	-9.20159	-6.54532	-8.87928	0.95917	-2.32444		41.1	-1.53689	-11.2175	-7.69076	-7.8544	0.462863	-3.47339
41.2	-3.35297	-7.61393	-5.6075	-7.68731	-0.613471	-0.196119		41.2	-1.49673	-11.1777	-7.85633	-7.91126	0.890271	-3.2449
41.3	-5.0366	-6.92351	-5.24036	-6.79748	-1.67902	1.45005		41.3	-1.51934	-11.0283	-7.88156	-7.7505	1.2797	-3.07398
41.4	-6.11224	-7.22761	-5.68578	-6.23271	-1.8487	2.20476		41.4	-1.63196	-10.7741	-7.78619	-7.34881	1.56625	-2.94932
41.5	-6.39858	-8.29218	-6.83834	-5.94466	-1.08466	1.96074		41.5	-1.83749	-10.4486	-7.60652	-6.7268	1.69826	-2.85498
41.6	-5.90432	-9.65148	-8.27852	-5.86451	0.293804	0.933398		41.6	-2.11229	-10.1147	-7.39096	-5.94928	1.65714	-2.77306
41.7	-4.82246	-10.817	-9.46459	-5.88341	1.79645	-0.49323		41.7	-2.40937	-9.85782	-7.19299	-5.11153	1.46766	-2.69155
41.8	-3.44341	-11.4523	-9.97474	-5.84456	3.01079	-1.96341		41.8	-2.66885	-9.76517	-7.05966	-4.31438	1.19286	-2.61302
41.9	-2.06929	-11.4604	-9.66469	-5.5482	3.76624	-3.26167		41.9	-2.83348	-9.89669	-7.01992	-3.63853	0.913231	-2.5603
42	-0.963031	-10.9855	-8.69744	-4.80781	4.05768	-4.32039		42	-2.86606	-10.2595	-7.07558	-3.12767	0.699374	-2.57243
42.1	-0.312849	-10.3142	-7.43878	-3.55205	3.91197	-5.16941		42.1	-2.76085	-10.8007	-7.19431	-2.78445	0.590067	-2.68825
42.2	-0.205805	-9.72521	-6.2815	-1.88017	3.34111	-5.83424		42.2	-2.54564	-11.4207	-7.31184	-2.57836	0.584275	-2.92518
42.3	-0.594026	-9.42733	-5.51947	-0.0853259	2.38772	-6.24388		42.3	-2.27353	-12.0064	-7.34786	-2.46082	0.64775	-3.26703
42.4	-1.25906	-9.58797	-5.29839	1.42118	1.15505	-6.2578		42.4	-2.00626	-12.4669	-7.23253	-2.37903	0.730631	-3.66792
42.5	-1.89016	-10.3415	-5.59909	2.25143	-0.191716	-5.74706		42.5	-1.79537	-12.76	-6.92937	-2.28548	0.789642	-4.06804
42.6	-2.23489	-11.7089	-6.24352	2.19243	-1.4257	-4.7413		42.6	-1.67022	-12.899	-6.44855	-2.14673	0.803004	-4.41125
42.7	-2.20881	-13.5131	-6.96066	1.28748	-2.31179	-3.5211		42.7	-1.63642	-12.9388	-5.84476	-1.95099	0.771835	-4.65971
42.8	-1.91458	-15.3695	-7.49155	-0.194668	-2.6764	-2.53061		42.8	-1.68162	-12.9494	-5.19916	-1.71239	0.709707	-4.79862
42.9	-1.56427	-16.8138	-7.62586	-1.85256	-2.4717	-2.16502		42.9	-1.78013	-12.9888	-4.59184	-1.46843	0.63333	-4.83138
43	-1.37805	-17.4639	-7.23833	-3.29393	-1.77748	-2.57776		43	-1.89402	-13.0853	-4.07628	-1.26929	0.562149	-4.7704
43.1	-1.48639	-17.1841	-6.29812	-4.23467	-0.769634	-3.60683		43.1	-1.97298	-13.2374	-3.66646	-1.16293	0.524141	-4.63364
43.2	-1.85507	-16.1205	-4.87782	-4.55414	0.324331	-4.85437		43.2	-1.96133	-13.422	-3.33847	-1.17891	0.558967	-4.44896
43.3	-2.31908	-14.6351	-3.1247	-4.27422	1.29699	-5.86864		43.3	-1.81394	-13.6041	-3.0432	-1.31342	0.713448	-4.25899
43.4	-2.69502	-13.1803	-1.29077	-3.52464	2.0236	-6.32779		43.4	-1.51317	-13.7433	-2.72613	-1.52359	1.02784	-4.12065
43.5	-2.86883	-12.1283	0.289712	-2.51701	2.48091	-6.18716		43.5	-1.0779	-13.7976	-2.34692	-1.73467	1.51607	-4.09167
43.6	-2.83754	-11.6411	1.31054	-1.4919	2.71007	-5.62313		43.6	-0.558946	-13.7278	-1.88901	-1.85956	2.1521	-4.20619
43.7	-2.63771	-11.6542	1.62695	-0.660586	2.75928	-4.8774		43.7	-0.0229361	-13.5072	-1.35745	-1.82398	2.87102	-4.45517
43.8	-2.24899	-11.9554	1.3258	-0.16669	2.70189	-4.13274		43.8	0.468891	-13.1327	-0.773329	-1.58752	3.58687	-4.78467
43.9	-1.54811	-12.3101	0.685514	-0.0719456	2.69497	-3.50925		43.9	0.878028	-12.6322	-0.166414	-1.15296	4.21636	-5.11319
44	-0.396005	-12.5659	0.0562073	-0.356984	2.97976	-3.10442		44	1.19706	-12.0623	0.428559	-0.56377	4.697	-5.3607
44.1	1.24659	-12.6833	-0.278736	-0.865472	3.78123	-3.02826		44.1	1.4451	-11.4919	0.971939	0.10748	4.99663	-5.48058
44.2	3.22281	-12.7084	-0.208861	-1.32153	5.15294	-3.3953		44.2	1.65541	-10.9812	1.41889	0.774778	5.11472	-5.47815
44.3	5.16479	-12.6319	0.202951	-1.39591	6.87421	-4.24857		44.3	1.86301	-10.5643	1.72822	1.35462	5.07701	-5.40764
44.4	6.61338	-12.3264	0.823931	-0.835598	8.50072	-5.46797		44.4	2.09596	-10.2441	1.88115	1.78086	4.92461	-5.34528
44.5	7.19759	-11.6201	1.5449	0.410213	9.54525	-6.76333		44.5	2.37087	-9.9979	1.89638	2.01594	4.70086	-5.35785
44.6	6.79678	-10.4465	2.30422	2.1671	9.69773	-7.76645		44.6	2.68957	-9.7897	1.82938	2.05607	4.44257	-5.47955
44.7	5.57729	-8.95648	3.07922	4.09374	8.9239	-8.1626		44.7	3.03886	-9.58342	1.752	1.92912	4.17563	-5.70443
44.8	3.9371	-7.49492	3.81642	5.78149	7.40127	-7.8146		44.8	3.38976	-9.35165	1.72262	1.68962	3.91187	-5.99225
44.9	2.36167	-6.4233	4.35964	6.85711	5.41802	-6.89221		44.9	3.69794	-9.07887	1.76445	1.4106	3.64643	-6.28385
45	1.2561	-5.95332	4.47339	7.06984	3.30449	-5.82745		45	3.90599	-8.7622	1.86194	1.16771	3.35572	-6.51795
45.1	0.834308	-6.09272	3.96795	6.33262	1.38254	-5.129		45.1	3.95243	-8.40812	1.97572	1.01878	3.00223	-6.64401
45.2	1.0912	-6.68531	2.88951	4.72904	-0.10992	-5.12713		45.2	3.78914	-8.03328	2.06362	0.983642	2.54814	-6.6318
45.3	1.83593	-7.45602	1.56948	2.50451	-1.09373	-5.83677		45.3	3.40175	-7.6667	2.09485	1.03623	1.97359	-6.47693
45.4	2.78029	-8.11481	0.487834	0.0216837	-1.63159	-6.94634		45.4	2.82269	-7.34958	2.05379	1.11591	1.29247	-6.1997
45.5	3.68887	-8.44863	0.0104944	-2.32493	-1.83609	-7.95572		45.5	2.12659	-7.12838	1.93738	1.14974	0.557493	-5.84052
45.6	4.41727	-8.37009	0.186047	-4.14335	-1.7889	-8.40209		45.6	1.40952	-7.04244	1.74803	1.07771	-0.151037	-5.45496
45.7	4.84305	-7.92861	0.767245	-5.1004	-1.53282	-8.06161		45.7	0.7596	-7.11144	1.4906	0.87309	-0.74778	-5.10775
45.8	4.78342	-7.29991	1.37855	-4.99453	-1.16069	-7.00795		45.8	0.231955	-7.32794	1.17668	0.551327	-1.16685	-4.85782
45.9	4.01226	-6.68895	1.72543	-3.85336	-0.856527	-5.53834		45.9	-0.163629	-7.65832	0.834253	0.16414	-1.37933	-4.73644
46	2.38882	-6.25978	1.69732	-1.99328	-0.845245	-4.04102		46	-0.459953	-8.04952	0.513783	-0.217243	-1.39732	-4.73127
46.1	0.0277715	-6.09449	1.3548	0.0584614	-1.26667	-2.83527		46.1	-0.715798	-8.44119	0.280767	-0.522583	-1.26423	-4.78768
46.2	-2.64641	-6.22901	0.846831	1.76478	-2.03381	-2.05027		46.2	-0.994004	-8.77991	0.19283	-0.701131	-1.03795	-4.83175
46.3	-5.03688	-6.68605	0.325267	2.74209	-2.79684	-1.66044		46.3	-1.34114	-9.03062	0.274041	-0.732208	-0.777185	-4.80299
46.4	-6.61287	-7.49564	-0.139763	2.8693	-3.12111	-1.6081		46.4	-1.77826	-9.18314	0.502877	-0.626723	-0.533583	-4.6783
46.5	-7.11161	-8.66778	-0.55978	2.30294	-2.74336	-1.91207		46.5	-2.30162	-9.25299	0.819171	-0.423541	-0.345881	-4.47743
46.6	-6.6083	-10.1038	-0.976994	1.38714	-1.70611	-2.64333		46.6	-2.88571	-9.27746	1.14312	-0.182967	-0.233656	-4.25017
46.7	-5.46881	-11.5699	-1.34792	0.487653	-0.307783	-3.7641		46.7	-3.4834	-9.30325	1.39868	0.0229544	-0.192831	-4.05596
46.8	-4.20321	-12.743	-1.48004	-0.150874	1.07674	-5.04107		46.8	-4.02714	-9.37112	1.53305	0.123557	-0.192999	-3.94369
46.9	-3.25816	-13.3438	-1.07177	-0.461737	2.15265	-6.08603		46.9	-4.43596	-9.50384	1.52763	0.065097	-0.180065	-3.93753
47	-2.89356	-13.2142	0.0745649	-0.53082	2.75298	-6.58593		47	-4.63244	-9.70278	1.39821	-0.174572	-0.0881852	-4.03473
47.1	-3.12103	-12.377	1.86841	-0.506627	2.80144	-6.45742		47.1	-4.56642	-9.95097	1.18518	-0.577681	0.138766	-4.21451
47.2	-3.74213	-11.0414	3.90071	-0.53168	2.30514	-5.83599		47.2	-4.23648	-10.2169	0.939812	-1.08667	0.522935	-4.44789
47.3	-4.47983	-9.55749	5.56306	-0.689255	1.40204	-4.98738		47.3	-3.69679	-10.4568	0.713686	-1.61828	1.04166	-4.7023
47.4	-5.08647	-8.34466	6.27433	-1.01065	0.374995	-4.19816		47.4	-3.04373	-10.6176	0.550825	-2.08836	1.63647	-4.93803
47.5	-5.37735	-7.73838	5.72317	-1.49386	-0.466666	-3.70646		47.5	-2.38771	-10.6499	0.482646	-2.43692	2.23524	-5.10401
47.6	-5.23126	-7.84262	4.00968	-2.14312	-0.859379	-3.62964		47.6	-1.82064	-10.5247	0.520413	-2.64153	2.77429	-5.14502
47.7	-4.56112	-8.51617	1.60523	-2.98709	-0.62537	-3.93638		47.7	-1.3925	-10.2491	0.645795	-2.71581	3.21221	-5.0179
47.8	-3.31247	-9.47634	-0.845381	-4.01592	0.295293	-4.48768		47.8	-1.10635	-9.86761	0.804518	-2.69456	3.53456	-4.71145
47.9	-1.52405	-10.4483	-2.7747	-5.08807	1.82435	-5.10646		47.9	-0.929037	-9.45088	0.915142	-2.61481	3.75283	-4.25485
48	0.572165	-11.2076	-3.84599	-5.91079	3.73405	-5.62786		48	-0.810364	-9.07795	0.894289	-2.50439	3.9008	-3.71247
48.1	2.56181	-11.5736	-3.9839	-6.16793	5.69716	-5.9331		48.1	-0.70038	-8.81615	0.686966	-2.38029	4.02664	-3.16852
48.2	3.99042	-11.4016	-3.32842	-5.68843	7.36836	-5.91956		48.2	-0.560178	-8.70241	0.288786	-2.25337	4.17965	-2.70558
48.3	4.54395	-10.6515	-2.13603	-4.53853	8.47299	-5.46489		48.3	-0.366936	-8.73147	-0.249621	-2.13308	4.39379	-2.3835
48.4	4.17144	-9.44261	-0.705896	-2.99069	8.85608	-4.46137		48.4	-0.115448	-8.86087	-0.837351	-2.02932	4.67879	-2.22301
48.5	3.07515	-8.05818	0.651455	-1.41357	8.5215	-2.88007		48.5	0.182637	-9.03193	-1.37248	-1.94805	5.01805	-2.20191
48.6	1.60646	-6.85765	1.62653	-0.100502	7.63248	-0.876357		48.6	0.499595	-9.19294	-1.7765	-1.88275	5.37224	-2.26343
48.7	0.120692	-6.1299	1.95517	0.824975	6.46358	1.1763		48.7	0.791174	-9.31262	-2.01725	-1.81127	5.6863	-2.33466
48.8	-1.10359	-6.03715	1.5139	1.37051	5.31695	2.76306		48.8	1.00229	-9.37823	-2.1116	-1.70473	5.89861	-2.34763
48.9	-1.8724	-6.59081	0.376228	1.57797	4.44454	3.41109		48.9	1.08202	-9.39066	-2.11075	-1.5462	5.95378	-2.25964
49	-2.09639	-7.62389	-1.20601	1.46834	4.00314	2.88271		49	1.00474	-9.35998	-2.0782	-1.34472	5.8152	-2.06509
49.1	-1.80136	-8.83868	-2.87859	1.03434	4.01537	1.27708		49.1	0.783093	-9.30675	-2.07111	-1.13616	5.47563	-1.7983
49.2	-1.10206	-9.93817	-4.26825	0.26998	4.37836	-0.978056		49.2	0.466196	-9.26351	-2.12922	-0.972783	4.96293	-1.52867
49.3	-0.163822	-10.7506	-5.08752	-0.761397	4.90801	-3.27096		49.3	0.123346	-9.27279	-2.27247	-0.907386	4.33883	-1.34943
49.4	0.827165	-11.2534	-5.26302	-1.87704	5.39589	-4.98228		49.4	-0.178873	-9.3772	-2.5023	-0.980031	3.68723	-1.3603
49.5	1.64437	-11.511	-4.9382	-2.80078	5.6342	-5.69845		49.5	-0.393501	-9.60267	-2.80289	-1.21205	3.09237	-1.64232
49.6	2.06486	-11.5637	-4.37868	-3.27686	5.43371	-5.32707		49.6	-0.500389	-9.94729	-3.14303	-1.60554	2.61359	-2.23003
49.7	1.92769	-11.4188	-3.83153	-3.21581	4.67202	-4.13198		49.7	-0.506759	-10.376	-3.48002	-2.14273	2.2697	-3.09254
49.8	1.24792	-11.0519	-3.43048	-2.74271	3.34124	-2.62582		49.8	-0.443175	-10.8273	-3.76425	-2.78644	2.03919	-4.13377
49.9	0.222505	-10.4968	-3.2079	-2.14297	1.59573	-1.38411		49.9	-0.354713	-11.232	-3.94521	-3.48312	1.8734	-5.21523
50	-0.843305	-9.91647	-3.124	-1.7611	-0.243046	-0.88114		50	-0.287255	-11.5373	-3.98265	-4.17097	1.71432	-6.19527
50.1	-1.657	-9.60033	-3.14116	-1.87894	-1.75358	-1.41436		50.1	-0.274813	-11.721	-3.86278	-4.79225	1.50994	-6.96991
50.2	-2.06259	-9.83307	-3.25567	-2.64854	-2.55568	-3.06471		50.2	-0.333212	-11.7897	-3.61012	-5.30797	1.22392	-7.49923
50.3	-2.0422	-10.6907	-3.48348	-4.04486	-2.48012	-5.67078		50.3	-0.463145	-11.7656	-3.28112	-5.7088	0.843907	-7.81389
50.4	-1.69642	-11.9884	-3.82718	-5.8643	-1.67563	-8.81474		50.4	-0.652248	-11.6747	-2.94342	-6.01845	0.385435	-7.99883
50.5	-1.21187	-13.3257	-4.21493	-7.7617	-0.529324	-11.8997		50.5	-0.872453	-11.5443	-2.65225	-6.28885	-0.110883	-8.16219
50.6	-0.791471	-14.2632	-4.45566	-9.36518	0.525937	-14.2898		50.6	-1.07722	-11.4035	-2.43762	-6.58369	-0.588352	-8.39868
50.7	-0.592543	-14.5037	-4.28235	-10.3752	1.18472	-15.5021		50.7	-1.20894	-11.2813	-2.30506	-6.95837	-0.985388	-8.76095
50.8	-0.654568	-14.0284	-3.51512	-10.6591	1.31107	-15.3835		50.8	-1.21568	-11.1987	-2.24417	-7.44594	-1.24666	-9.24836
50.9	-0.890546	-13.0609	-2.23037	-10.2916	0.903857	-14.1469		50.9	-1.0725	-11.1591	-2.2368	-8.04825	-1.33426	-9.81437
51	-1.15661	-11.9185	-0.792241	-9.5287	0.0456381	-12.2695		51	-0.796737	-11.1399	-2.25869	-8.73541	-1.23977	-10.3849
51.1	-1.3817	-10.844	0.329873	-8.69121	-1.06431	-10.3314		51.1	-0.443661	-11.0939	-2.27912	-9.45444	-0.993406	-10.8794
51.2	-1.57037	-9.96521	0.80275	-8.06471	-2.15982	-8.84252		51.2	-0.0869511	-10.9622	-2.26473	-10.1421	-0.662209	-11.2271
51.3	-1.67862	-9.34748	0.571257	-7.87366	-3.0037	-8.10422		51.3	0.205506	-10.694	-2.18686	-10.7395	-0.332124	-11.377
51.4	-1.55338	-9.0247	-0.182849	-8.22813	-3.44495	-8.15235		51.4	0.390932	-10.2667	-2.02962	-11.2082	-0.080453	-11.3036
51.5	-0.991258	-8.97396	-1.17692	-9.11227	-3.40837	-8.7843		51.5	0.460313	-9.69873	-1.7996	-11.5388	0.0465813	-11.0133
51.6	0.107825	-9.09313	-2.17282	-10.4318	-2.84589	-9.67013		51.6	0.435	-9.04922	-1.53402	-11.7543	0.042464	-10.5478
51.7	1.59081	-9.2427	-2.99876	-12.0002	-1.73233	-10.5032		51.7	0.352528	-8.40107	-1.29704	-11.9014	-0.0611807	-9.97779
51.8	3.03099	-9.27525	-3.51317	-13.5607	-0.147132	-11.113		51.8	0.249726	-7.83469	-1.15991	-12.0328	-0.207544	-9.3891
51.9	3.9397	-9.04953	-3.60303	-14.872	1.63246	-11.4717		51.9	0.149922	-7.40476	-1.1706	-12.189	-0.333157	-8.86259
52	4.02187	-8.4532	-3.23884	-15.7344	3.15023	-11.5813		52	0.0625905	-7.13295	-1.33266	-12.391	-0.388098	-8.45187
52.1	3.27536	-7.42856	-2.50349	-16.0215	3.93581	-11.3626		52.1	-0.011496	-7.01192	-1.60679	-12.639	-0.349983	-8.16899
52.2	1.94036	-6.06143	-1.54185	-15.7287	3.74908	-10.6525		52.2	-0.0771749	-7.01281	-1.93099	-12.9154	-0.226422	-7.98639
52.3	0.388014	-4.60788	-0.545207	-14.9853	2.68552	-9.35539		52.3	-0.149114	-7.09292	-2.24271	-13.1926	-0.0465361	-7.85033
52.4	-1.02287	-3.46188	0.232498	-14.0385	1.11472	-7.58831		52.4	-0.259249	-7.20402	-2.49498	-13.437	0.152366	-7.69861
52.5	-2.05659	-3.00993	0.513428	-13.1605	-0.450892	-5.69309		52.5	-0.455187	-7.30227	-2.66303	-13.606	0.330676	-7.47715
52.6	-2.63818	-3.43241	0.10084	-12.5252	-1.58432	-4.13919		52.6	-0.785967	-7.35661	-2.74603	-13.6521	0.443798	-7.15068
52.7	-2.85328	-4.60962	-0.973969	-12.1844	-2.08977	-3.31873		52.7	-1.27714	-7.35435	-2.76729	-13.5345	0.444333	-6.70445
52.8	-2.86632	-6.22325	-2.42504	-12.1256	-1.99832	-3.34911		52.8	-1.91303	-7.30389	-2.769	-13.2335	0.296773	-6.14142
52.9	-2.82984	-7.9077	-3.85748	-12.2801	-1.51186	-4.03368		52.9	-2.63644	-7.23537	-2.79799	-12.7616	-0.00251159	-5.48156
53	-2.79516	-9.36263	-4.94019	-12.5717	-0.903157	-4.99994		53	-3.36391	-7.19738	-2.88929	-12.1666	-0.413175	-4.76421
53.1	-2.77635	-10.3865	-5.48215	-12.9412	-0.386892	-5.83943		53.1	-4.01098	-7.24512	-3.05737	-11.5206	-0.859891	-4.05167
53.2	-2.86355	-10.8628	-5.46537	-13.2664	-0.0270418	-6.20495		53.2	-4.51689	-7.42026	-3.29415	-10.8988	-1.25685	-3.42176
53.3	-3.22313	-10.7634	-5.02976	-13.306	0.185386	-5.9054		53.3	-4.85838	-7.72892	-3.56848	-10.3544	-1.53523	-2.94813
53.4	-4.03244	-10.1664	-4.40966	-12.7839	0.190745	-4.95316		53.4	-5.05066	-8.13403	-3.8303	-9.90418	-1.6636	-2.67789
53.5	-5.31902	-9.23681	-3.87468	-11.561	-0.138029	-3.52714		53.5	-5.13844	-8.56773	-4.01969	-9.531	-1.65316	-2.61523
53.6	-6.87041	-8.1918	-3.63215	-9.75446	-0.876058	-1.90031		53.6	-5.17813	-8.9559	-4.08296	-9.20007	-1.54795	-2.71871
53.7	-8.27597	-7.28822	-3.73163	-7.71308	-1.93762	-0.363538		53.7	-5.21744	-9.23861	-3.98878	-8.87364	-1.40606	-2.91457
53.8	-9.09173	-6.78281	-4.05551	-5.90578	-3.04547	0.832195		53.8	-5.28265	-9.38026	-3.73636	-8.52301	-1.27744	-3.12078
53.9	-9.0599	-6.87292	-4.39929	-4.747	-3.8451	1.46071		53.9	-5.38239	-9.37158	-3.35537	-8.13306	-1.19106	-3.26982
54	-8.21236	-7.5854	-4.57046	-4.41371	-4.06274	1.35316		54	-5.51407	-9.22643	-2.90126	-7.6996	-1.15541	-3.32705
54.1	-6.82828	-8.70911	-4.43112	-4.78458	-3.61782	0.463404		54.1	-5.66589	-8.97661	-2.44436	-7.22776	-1.16943	-3.30035
54.2	-5.32534	-9.89674	-3.93744	-5.50655	-2.6331	-1.09901		54.2	-5.81709	-8.66404	-2.05224	-6.737	-1.22907	-3.23274
54.3	-4.13044	-10.8053	-3.11882	-6.18127	-1.40691	-3.0739		54.3	-5.93514	-8.33425	-1.77044	-6.26533	-1.32396	-3.18384
54.4	-3.52795	-11.2086	-2.04953	-6.55863	-0.301164	-5.07806		54.4	-5.9787	-8.03048	-1.60785	-5.86505	-1.43006	-3.21155
54.5	-3.53467	-11.0292	-0.823976	-6.57629	0.413763	-6.67871		54.5	-5.90811	-7.78599	-1.53657	-5.58792	-1.50604	-3.35484
54.6	-3.93831	-10.3159	0.433699	-6.3195	0.674761	-7.53916		54.6	-5.70098	-7.61372	-1.50719	-5.46672	-1.49859	-3.62323
54.7	-4.49084	-9.21507	1.53658	-5.94261	0.565204	-7.53357		54.7	-5.36628	-7.49765	-1.47174	-5.49937	-1.35856	-3.99644
54.8	-5.01479	-7.91898	2.23765	-5.57224	0.219132	-6.81242		54.8	-4.94602	-7.38914	-1.39849	-5.64408	-1.06148	-4.42999
54.9	-5.4445	-6.61569	2.30195	-5.24512	-0.26524	-5.7511		54.9	-4.50458	-7.21539	-1.2762	-5.82999	-0.622537	-4.86452
55	-5.7935	-5.44971	1.63632	-4.96326	-0.828631	-4.75595		55	-4.11017	-6.90096	-1.11295	-5.9792	-0.0976358	-5.23533
55.1	-6.03933	-4.56009	0.380963	-4.76543	-1.42225	-4.12182		55.1	-3.81309	-6.39239	-0.930704	-6.03004	0.431904	-5.4822
55.2	-6.05958	-4.07268	-1.11065	-4.75642	-1.94178	-3.99834		55.2	-3.62868	-5.67846	-0.75922	-5.95366	0.886303	-5.56076
55.3	-5.67032	-4.03541	-2.42051	-5.04325	-2.16774	-4.33612		55.3	-3.53441	-4.79704	-0.631741	-5.75624	1.21308	-5.45609
55.4	-4.75481	-4.35965	-3.23202	-5.65266	-1.81103	-4.92616		55.4	-3.48236	-3.82723	-0.581344	-5.4709	1.40054	-5.19277
55.5	-3.40191	-4.80975	-3.45294	-6.46075	-0.664925	-5.51242		55.5	-3.41946	-2.87105	-0.634923	-5.14487	1.47538	-4.83308
55.6	-1.91541	-5.02809	-3.15406	-7.20714	1.20533	-5.90973		55.6	-3.30339	-2.02878	-0.804671	-4.82669	1.48976	-4.4621
55.7	-0.707919	-4.63165	-2.49149	-7.57408	3.39926	-6.03372		55.7	-3.11163	-1.37552	-1.07829	-4.55716	1.50252	-4.1628
55.8	-0.123215	-3.3638	-1.65594	-7.32118	5.30551	-5.84045		55.8	-2.84383	-0.946202	-1.41383	-4.36458	1.5613	-3.99316
55.9	-0.275044	-1.25115	-0.839193	-6.3708	6.36907	-5.29576		55.9	-2.5187	-0.733827	-1.74588	-4.26287	1.69235	-3.97492
56	-0.995495	1.33161	-0.203599	-4.88283	6.31788	-4.40939		56	-2.16893	-0.695227	-2.00356	-4.25054	1.9	-4.09469
56.1	-1.92534	3.77548	0.117621	-3.20247	5.25404	-3.29876		56.1	-1.83659	-0.760977	-2.13283	-4.30841	2.17054	-4.30978
56.2	-2.64981	5.4576	0.0327731	-1.7255	3.60064	-2.20222		56.2	-1.56725	-0.851272	-2.1122	-4.39821	2.47344	-4.56167
56.3	-2.86905	5.93916	-0.477148	-0.77699	1.94706	-1.42439		56.3	-1.40304	-0.896538	-1.95802	-4.46637	2.76043	-4.79233
56.4	-2.51763	5.10354	-1.34913	-0.533684	0.809546	-1.22688		56.4	-1.37445	-0.856483	-1.71844	-4.45898	2.96804	-4.95828
56.5	-1.75483	3.1865	-2.41394	-0.990125	0.43601	-1.72437		56.5	-1.49265	-0.731774	-1.46218	-4.34296	3.0287	-5.03768
56.6	-0.891984	0.682652	-3.4022	-1.97135	0.734059	-2.86717		56.6	-1.74216	-0.566328	-1.26101	-4.12233	2.89033	-5.03128
56.7	-0.266243	-1.83933	-4.0085	-3.23418	1.3992	-4.4459		56.7	-2.07991	-0.440177	-1.16962	-3.84035	2.53907	-4.95999
56.8	-0.0931896	-3.90389	-3.99963	-4.55578	2.10783	-6.15793		56.8	-2.44619	-0.448963	-1.20933	-3.56648	2.01132	-4.86137
56.9	-0.409865	-5.19043	-3.30822	-5.74017	2.65735	-7.65487		56.9	-2.78496	-0.674338	-1.36463	-3.36818	1.38597	-4.78595
57	-1.09154	-5.57042	-2.06971	-6.56992	2.9816	-8.61829		57	-3.06405	-1.15664	-1.59164	-3.28387	0.759015	-4.78788
57.1	-1.96313	-5.12918	-0.611057	-6.81125	3.06788	-8.84729		57.1	-3.28611	-1.87608	-1.83405	-3.3111	0.212376	-4.90781
57.2	-2.9159	-4.12881	0.619986	-6.33517	2.86438	-8.33362		57.2	-3.48419	-2.75198	-2.03826	-3.41233	-0.210927	-5.15381
57.3	-3.92495	-2.90804	1.20232	-5.23483	2.23654	-7.25957		57.3	-3.70378	-3.66622	-2.16128	-3.53286	-0.51411	-5.4929
57.4	-4.94944	-1.81907	0.928457	-3.82343	1.04698	-5.92483		57.4	-3.98289	-4.49975	-2.17638	-3.62008	-0.735476	-5.85802
57.5	-5.86496	-1.21925	-0.102384	-2.5275	-0.665909	-4.62858		57.5	-4.33767	-5.16812	-2.07773	-3.63635	-0.925646	-6.16994
57.6	-6.50194	-1.4005	-1.51423	-1.71499	-2.60262	-3.61924		57.6	-4.75863	-5.6416	-1.8862	-3.56154	-1.12697	-6.36554
57.7	-6.75459	-2.49977	-2.84376	-1.51167	-4.31304	-3.12721		57.7	-5.21717	-5.943	-1.65154	-3.38884	-1.36705	-6.41814
57.8	-6.6698	-4.42373	-3.74153	-1.76928	-5.40426	-3.33168		57.8	-5.67659	-6.13108	-1.44455	-3.12345	-1.66466	-6.34409
57.9	-6.42484	-6.77276	-4.08814	-2.18837	-5.69222	-4.24093		57.9	-6.10351	-6.27566	-1.33951	-2.78995	-2.03293	-6.19508
58	-6.23644	-8.95114	-3.94866	-2.49794	-5.24909	-5.60639		58	-6.47305	-6.43499	-1.39062	-2.44097	-2.4749	-6.03704
58.1	-6.25056	-10.4386	-3.44052	-2.58274	-4.34457	-6.99141		58.1	-6.76279	-6.64544	-1.61224	-2.15439	-2.97408	-5.92574
58.2	-6.49972	-10.9834	-2.6706	-2.47273	-3.32721	-7.9314		58.2	-6.94358	-6.92254	-1.96968	-2.01602	-3.48411	-5.8894
58.3	-6.92337	-10.6797	-1.72519	-2.24808	-2.49883	-8.16978		58.3	-6.9796	-7.26427	-2.38623	-2.0926	-3.9286	-5.92468
58.4	-7.42244	-9.88844	-0.752522	-1.96235	-2.02327	-7.77122		58.4	-6.83918	-7.65088	-2.76706	-2.40448	-4.22009	-6.00687
58.5	-7.88848	-9.02767	-0.0103751	-1.61982	-1.97349	-7.05212		58.5	-6.5123	-8.0437	-3.03062	-2.91211	-4.29309	-6.10376
58.6	-8.21994	-8.38784	0.210567	-1.22868	-2.40202	-6.396		58.6	-6.02407	-8.38494	-3.13102	-3.5285	-4.1299	-6.18129
58.7	-8.34926	-8.02826	-0.284086	-0.900314	-3.27911	-6.08504		58.7	-5.43158	-8.60386	-3.06432	-4.15061	-3.76569	-6.2004
58.8	-8.24516	-7.83782	-1.47995	-0.878565	-4.44551	-6.16066		58.8	-4.80652	-8.63544	-2.85685	-4.69127	-3.27278	-6.11771
58.9	-7.84161	-7.70648	-3.14749	-1.4634	-5.62175	-6.44149		58.9	-4.21212	-8.4436	-2.54829	-5.09742	-2.73514	-5.89602
59	-6.99838	-7.61875	-4.87409	-2.88258	-6.43395	-6.64182		59	-3.68622	-8.0352	-2.17946	-5.35284	-2.2259	-5.51935
59.1	-5.56173	-7.62843	-6.15287	-5.12518	-6.50941	-6.52458		59.1	-3.23487	-7.45795	-1.78591	-5.46991	-1.79157	-5.00496
59.2	-3.47786	-7.79156	-6.57661	-7.82957	-5.62122	-6.02585		59.2	-2.83872	-6.78163	-1.3996	-5.4787	-1.44332	-4.40272
59.3	-0.944868	-8.07841	-5.99475	-10.3446	-3.84352	-5.26643		59.3	-2.46702	-6.07397	-1.05137	-5.41916	-1.15897	-3.7806
59.4	1.54525	-8.30083	-4.55051	-11.9903	-1.53891	-4.44516		59.4	-2.09401	-5.38465	-0.768439	-5.33624	-0.892783	-3.20358
59.5	3.40261	-8.14543	-2.60767	-12.3452	0.787414	-3.65659		59.5	-1.70687	-4.74168	-0.567094	-5.27161	-0.588039	-2.71336
59.6	4.20111	-7.30955	-0.561055	-11.3796	2.6871	-2.83512		59.6	-1.30496	-4.15793	-0.44247	-5.25128	-0.194711	-2.31865
59.7	3.86839	-5.69	1.29685	-9.40236	3.89089	-1.83765		59.7	-0.893754	-3.63808	-0.36551	-5.27649	0.314924	-2.00233
59.8	2.6898	-3.49581	2.82956	-6.92499	4.31256	-0.588127		59.8	-0.482517	-3.17774	-0.290678	-5.3218	0.940369	-1.73669
59.9	1.1731	-1.17007	4.01981	-4.46281	4.05635	0.813238		59.9	-0.088593	-2.75992	-0.173226	-5.33693	1.65058	-1.49562
60	-0.188828	0.817673	4.84192	-2.39756	3.42148	2.06838		60	0.255025	-2.35553	0.0105776	-5.25636	2.38166	-1.25812
60.1	-1.10351	2.1418	5.16746	-0.950123	2.81068	2.80478		60.1	0.497058	-1.92691	0.253895	-5.0173	3.04273	-1.00761
60.2	-1.54723	2.69066	4.79945	-0.21031	2.55163	2.75725		60.2	0.58094	-1.43881	0.5245	-4.58368	3.53893	-0.732228
60.3	-1.63861	2.54278	3.63343	-0.129902	2.77862	1.93781		60.3	0.474042	-0.873759	0.778769	-3.96349	3.80301	-0.428387
60.4	-1.51673	1.89534	1.83452	-0.554671	3.40748	0.624913		60.4	0.194165	-0.245797	0.977571	-3.21022	3.82044	-0.109051
60.5	-1.25473	0.99965	-0.171626	-1.30713	4.21828	-0.783091		60.5	-0.186081	0.393161	1.09437	-2.40927	3.6362	0.190597
60.6	-0.850571	0.119298	-1.87535	-2.23373	5.0108	-1.9257		60.6	-0.560532	0.962049	1.11616	-1.65466	3.34028	0.417455
60.7	-0.301673	-0.515777	-2.8774	-3.13977	5.63966	-2.54367		60.7	-0.824843	1.3774	1.04256	-1.02404	3.04046	0.514373
60.8	0.279784	-0.753727	-3.02822	-3.75552	5.91891	-2.48706		60.8	-0.91189	1.58556	0.886664	-0.561538	2.82822	0.437857
60.9	0.636701	-0.505122	-2.44021	-3.7655	5.61703	-1.76717		60.9	-0.810509	1.58278	0.67791	-0.274247	2.74912	0.176477
61	0.48112	0.219385	-1.39447	-2.97318	4.59191	-0.584904		61	-0.560803	1.4162	0.463697	-0.138496	2.79109	-0.236856
61.1	-0.272014	1.305	-0.227935	-1.44689	2.95035	0.720137		61.1	-0.232284	1.16612	0.305186	-0.111754	2.89576	-0.726856
61.2	-1.3553	2.52992	0.771966	0.460198	1.08369	1.77212		61.2	0.0992604	0.919777	0.263783	-0.147963	2.98446	-1.19732
61.3	-2.26309	3.55274	1.42452	2.2366	-0.444892	2.25889		61.3	0.369969	0.748833	0.381116	-0.208287	2.99025	-1.56347
61.4	-2.49727	3.98109	1.66725	3.42609	-1.1398	2.01894		61.4	0.537055	0.694917	0.661124	-0.262281	2.88197	-1.77886
61.5	-1.80347	3.56518	1.57847	3.79559	-0.784416	1.05947		61.5	0.581219	0.762784	1.06409	-0.283598	2.66858	-1.84666
61.6	-0.306708	2.36865	1.3695	3.39965	0.448281	-0.487524		61.6	0.505028	0.924571	1.51662	-0.252229	2.38945	-1.81508
61.7	1.53465	0.770363	1.29311	2.48639	2.07684	-2.37508		61.7	0.332189	1.13237	1.9332	-0.163362	2.10241	-1.76158
61.8	3.14149	-0.690056	1.52585	1.35764	3.52423	-4.22188		61.8	0.108608	1.33112	2.23912	-0.0377314	1.86932	-1.76844
61.9	4.03759	-1.56063	2.10476	0.2443	4.33092	-5.57275		61.9	-0.10101	1.47071	2.38678	0.0763146	1.74092	-1.89898
62	3.99765	-1.64509	2.92957	-0.745448	4.28658	-6.06008		62	-0.227672	1.51461	2.36529	0.112615	1.74484	-2.18393
62.1	3.08532	-1.0107	3.82919	-1.58018	3.50578	-5.5997		62.1	-0.222939	1.44562	2.20204	0.00778541	1.88146	-2.61858
62.2	1.58573	0.0830735	4.5885	-2.22503	2.37754	-4.44467		62.2	-0.081095	1.27252	1.95433	-0.276096	2.1264	-3.16656
62.3	-0.0997786	1.27304	4.97502	-2.59611	1.38318	-3.07826		62.3	0.152875	1.03491	1.69499	-0.736523	2.43616	-3.76996
62.4	-1.59692	2.23461	4.81564	-2.6065	0.894495	-2.00686		62.4	0.39765	0.796032	1.49208	-1.32948	2.75438	-4.36063
62.5	-2.65848	2.77892	4.05374	-2.24479	1.03933	-1.57751		62.5	0.565619	0.62256	1.38975	-1.98381	3.02237	-4.86954
62.6	-3.16418	2.8736	2.76031	-1.62977	1.65451	-1.88385		62.6	0.594707	0.562627	1.39716	-2.62265	3.19511	-5.23915
62.7	-3.08239	2.59239	1.11588	-1.0344	2.4091	-2.80399		62.7	0.466955	0.629431	1.49046	-3.1852	3.25383	-5.43982
62.8	-2.42525	2.05135	-0.593332	-0.829776	3.01687	-4.12407		62.8	0.208623	0.798075	1.62592	-3.63892	3.20942	-5.48046
62.9	-1.27485	1.35696	-2.00337	-1.32191	3.40628	-5.6169		62.9	-0.124053	1.01398	1.75472	-3.97992	3.0958	-5.4069
63	0.148259	0.610033	-2.78642	-2.58938	3.71909	-7.05679		63	-0.46469	1.20878	1.83031	-4.22785	2.95433	-5.28553
63.1	1.48021	-0.058248	-2.74166	-4.40117	4.12619	-8.23889		63.1	-0.75382	1.32186	1.81343	-4.4187	2.81788	-5.17957
63.2	2.3577	-0.495713	-1.87092	-6.28472	4.62518	-8.98196		63.2	-0.951012	1.31982	1.68043	-4.5976	2.70106	-5.12812
63.3	2.54877	-0.580367	-0.370157	-7.72398	5.00422	-9.13886		63.3	-1.03904	1.20199	1.43238	-4.81067	2.60001	-5.13803
63.4	2.02915	-0.248506	1.41918	-8.37385	5.01343	-8.65845		63.4	-1.02134	0.992457	1.10086	-5.09854	2.50095	-5.18883
63.5	0.969711	0.44561	3.11188	-8.20567	4.52245	-7.6334		63.5	-0.918246	0.72762	0.745281	-5.48844	2.39282	-5.24232
63.6	-0.354058	1.30632	4.40756	-7.469	3.57598	-6.26353		63.6	-0.768158	0.443697	0.438461	-5.98298	2.27467	-5.25143
63.7	-1.65785	2.02535	5.11921	-6.5425	2.35497	-4.80951		63.7	-0.631152	0.167896	0.241448	-6.54899	2.15346	-5.16731
63.8	-2.7055	2.30089	5.11422	-5.79482	1.10084	-3.53648		63.8	-0.583658	-0.0849658	0.179561	-7.11678	2.03454	-4.94795
63.9	-3.32948	2.00537	4.30146	-5.46949	0.0579292	-2.64341		63.9	-0.701072	-0.312384	0.232317	-7.59226	1.91174	-4.56918
64	-3.45204	1.23837	2.7141	-5.63747	-0.602826	-2.20358		64	-1.02931	-0.52194	0.341181	-7.88415	1.76646	-4.03327
64.1	-3.09332	0.231442	0.598814	-6.22871	-0.823351	-2.17528		64.1	-1.56149	-0.726327	0.430539	-7.93636	1.57819	-3.37262
64.2	-2.35771	-0.783083	-1.58207	-7.13858	-0.644739	-2.44106		64.2	-2.23355	-0.941071	0.432104	-7.74924	1.33955	-2.6466
64.3	-1.41155	-1.62863	-3.28461	-8.2581	-0.183592	-2.79327		64.3	-2.94625	-1.1888	0.305151	-7.37615	1.06446	-1.92745
64.4	-0.530891	-2.2343	-4.10006	-9.44157	0.400531	-2.95883		64.4	-3.59955	-1.50156	0.0439517	-6.89653	0.785456	-1.28303
64.5	-0.0961458	-2.63728	-3.94255	-10.4518	0.956313	-2.69407		64.5	-4.12205	-1.91452	-0.327194	-6.38546	0.54209	-0.766497
64.6	-0.467455	-2.94169	-3.05544	-10.9744	1.38459	-1.88781		64.6	-4.48664	-2.44853	-0.763744	-5.89255	0.369409	-0.412918
64.7	-1.84778	-3.25608	-1.88957	-10.6725	1.63139	-0.617687		64.7	-4.70906	-3.09352	-1.20527	-5.4339	0.28947	-0.239598
64.8	-4.09985	-3.6207	-0.890972	-9.36334	1.65647	0.871527		64.8	-4.83328	-3.8067	-1.57673	-4.99953	0.306231	-0.242718
64.9	-6.68927	-3.9703	-0.351825	-7.17232	1.42466	2.24924		64.9	-4.91246	-4.52412	-1.79642	-4.56883	0.40413	-0.39449
65	-8.87638	-4.23101	-0.343552	-4.54288	0.947302	3.20344		65	-4.99215	-5.17864	-1.79493	-4.12422	0.549587	-0.647546
65.1	-10.0868	-4.45983	-0.739021	-2.03137	0.336958	3.567		65.1	-5.10019	-5.7166	-1.54221	-3.65389	0.695029	-0.945121
65.2	-10.1364	-4.87136	-1.32851	-0.0521404	-0.220684	3.32181		65.2	-5.24559	-6.11115	-1.06809	-3.14844	0.787764	-1.23748
65.3	-9.23654	-5.71397	-1.90191	1.2192	-0.561227	2.51754		65.3	-5.41928	-6.36453	-0.458984	-2.59982	0.782813	-1.49832
65.4	-7.85584	-7.05279	-2.30214	1.837	-0.580601	1.20132		65.4	-5.59285	-6.50049	0.1704	-2.00755	0.653737	-1.73398
65.5	-6.48666	-8.66396	-2.39172	2.00221	-0.258128	-0.590035		65.5	-5.72117	-6.55272	0.71442	-1.38816	0.397858	-1.97931
65.6	-5.44116	-10.1188	-2.01327	1.91487	0.342852	-2.69645		65.6	-5.7485	-6.55559	1.10575	-0.783153	0.0333459	-2.2816
65.7	-4.79822	-10.9578	-1.02066	1.68445	1.06146	-4.78371		65.7	-5.62259	-6.53906	1.32504	-0.254785	-0.404794	-2.67891
65.8	-4.44799	-10.8953	0.624174	1.32959	1.64942	-6.47725		65.8	-5.31205	-6.52782	1.39425	0.131131	-0.868081	-3.18566
65.9	-4.19435	-9.9285	2.71417	0.856935	1.82777	-7.49983		65.9	-4.81879	-6.53892	1.36004	0.329863	-1.30029	-3.78805
66	-3.88328	-8.33598	4.7754	0.334655	1.39291	-7.76337		66	-4.17833	-6.57471	1.27557	0.333322	-1.6481	-4.45032
66.1	-3.48373	-6.54167	6.25468	-0.114997	0.316363	-7.39319		66.1	-3.452	-6.61407	1.19003	0.169248	-1.87631	-5.12492
66.2	-3.04684	-4.94863	6.75697	-0.383314	-1.23798	-6.70027		66.2	-2.71234	-6.60943	1.14215	-0.110589	-1.98185	-5.76017
66.3	-2.64892	-3.82952	6.1929	-0.444727	-2.96536	-6.05844		66.3	-2.02428	-6.49731	1.15716	-0.448298	-1.99951	-6.30292
66.4	-2.31239	-3.30492	4.76299	-0.387416	-4.56532	-5.75648		66.4	-1.43295	-6.22036	1.24307	-0.796594	-1.99352	-6.69949
66.5	-1.95932	-3.33964	2.83705	-0.381093	-5.7919	-5.88285		66.5	-0.958834	-5.75434	1.38672	-1.12627	-2.03655	-6.90671
66.6	-1.41009	-3.77934	0.824744	-0.611733	-6.45122	-6.36552		66.6	-0.598386	-5.12804	1.55197	-1.42305	-2.186	-6.9093
66.7	-0.49091	-4.41959	-0.925158	-1.16445	-6.40023	-7.03716		66.7	-0.330331	-4.42312	1.68337	-1.67995	-2.46717	-6.73002
66.8	0.800968	-5.06839	-2.17495	-1.97256	-5.57579	-7.69161		66.8	-0.126896	-3.75096	1.71989	-1.89073	-2.86674	-6.42814
66.9	2.21125	-5.54032	-2.78272	-2.8414	-4.10029	-8.14627		66.9	0.0379519	-3.21542	1.61565	-2.05027	-3.33859	-6.08628
67	3.33763	-5.63521	-2.71581	-3.53802	-2.35538	-8.28181		67	0.185785	-2.88089	1.35902	-2.16119	-3.82215	-5.78954
67.1	3.84134	-5.14674	-2.04701	-3.90405	-0.880796	-8.02534		67.1	0.331743	-2.75778	0.979507	-2.24115	-4.26435	-5.60234
67.2	3.56582	-3.95573	-0.931341	-3.91882	-0.15639	-7.33181		67.2	0.483847	-2.80548	0.538724	-2.32432	-4.63714	-5.55187
67.3	2.61886	-2.19652	0.428827	-3.68964	-0.388565	-6.21914		67.3	0.641987	-2.94928	0.111711	-2.45271	-4.94007	-5.62557
67.4	1.32939	-0.310656	1.78863	-3.36075	-1.47924	-4.82772		67.4	0.7947	-3.10608	-0.234816	-2.6589	-5.19339	-5.78503
67.5	0.108935	1.0884	2.85794	-3.03772	-3.13049	-3.42951		67.5	0.914232	-3.20726	-0.460133	-2.94707	-5.42958	-5.98476
67.6	-0.735952	1.49818	3.33506	-2.72634	-4.96486	-2.36784		67.6	0.957298	-3.21089	-0.558562	-3.28789	-5.69012	-6.18754
67.7	-1.08087	0.768133	3.00331	-2.3775	-6.62864	-1.95174		67.7	0.875337	-3.10448	-0.557671	-3.62816	-6.02491	-6.37098
67.8	-0.970568	-0.854615	1.89187	-2.00074	-7.90409	-2.3487		67.8	0.631889	-2.90326	-0.508744	-3.91314	-6.48389	-6.52616
67.9	-0.565546	-2.85582	0.305307	-1.74265	-8.75541	-3.5178		67.9	0.219001	-2.64625	-0.472339	-4.11102	-7.09744	-6.6526
68	-0.063147	-4.64033	-1.30042	-1.85847	-9.30284	-5.20047		68	-0.336519	-2.39396	-0.502122	-4.22499	-7.85686	-6.75646
68.1	0.375974	-5.74954	-2.49624	-2.5701	-9.71498	-7.0094		68.1	-0.976927	-2.22249	-0.631321	-4.28915	-8.70829	-6.85269
68.2	0.636808	-6.00527	-3.0539	-3.88627	-10.0984	-8.59368		68.2	-1.62975	-2.20719	-0.869767	-4.35245	-9.56683	-6.96952
68.3	0.621941	-5.49933	-3.00565	-5.51078	-10.4665	-9.761		68.3	-2.23086	-2.39812	-1.20582	-4.45949	-10.3419	-7.14703
68.4	0.241215	-4.48141	-2.59845	-6.95839	-10.8294	-10.4843		68.4	-2.74294	-2.79842	-1.61005	-4.63748	-10.9605	-7.42829
68.5	-0.592363	-3.25944	-2.1598	-7.75714	-11.2671	-10.8102		68.5	-3.16154	-3.35851	-2.03779	-4.89534	-11.3843	-7.84159
68.6	-1.92737	-2.11958	-1.95096	-7.68602	-11.903	-10.7843		68.6	-3.50814	-3.99129	-2.43137	-5.22729	-11.6169	-8.38034
68.7	-3.68145	-1.266	-2.09693	-6.90189	-12.7856	-10.4313		68.7	-3.81589	-4.60052	-2.73063	-5.61302	-11.6983	-8.99543
68.8	-5.6025	-0.857763	-2.55332	-5.84156	-13.791	-9.79092		68.8	-4.11654	-5.10985	-2.88838	-6.01489	-11.6903	-9.60589
68.9	-7.32111	-1.04077	-3.12773	-5.00965	-14.6306	-8.96781		68.9	-4.43441	-5.48293	-2.88584	-6.37732	-11.6549	-10.1246
69	-8.47922	-1.93644	-3.62476	-4.76571	-14.9838	-8.20515		69	-4.7854	-5.72692	-2.74057	-6.63624	-11.6369	-10.4855
69.1	-8.88946	-3.55637	-3.92425	-5.18048	-14.655	-7.84549		69.1	-5.17485	-5.88068	-2.50171	-6.73948	-11.6574	-10.6597
69.2	-8.59636	-5.71679	-4.01399	-6.06345	-13.6465	-8.21086		69.2	-5.59383	-5.99562	-2.23459	-6.66648	-11.7135	-10.6574
69.3	-7.85218	-8.02331	-3.9366	-7.1099	-12.17	-9.39405		69.3	-6.01569	-6.11809	-1.99969	-6.4382	-11.7822	-10.5179
69.4	-6.97309	-9.98921	-3.68754	-8.02078	-10.582	-11.1105		69.4	-6.3953	-6.27792	-1.83466	-6.11629	-11.8231	-10.296
69.5	-6.20235	-11.2115	-3.19539	-8.55811	-9.28817	-12.8051		69.5	-6.67517	-6.48732	-1.74868	-5.78572	-11.7849	-10.047
69.6	-5.67646	-11.5145	-2.37656	-8.5745	-8.61966	-13.8957		69.6	-6.80119	-6.74839	-1.72673	-5.52431	-11.6172	-9.8174
69.7	-5.46697	-10.9826	-1.25715	-8.01969	-8.70132	-14.0187		69.7	-6.7425	-7.05684	-1.74033	-5.37297	-11.2859	-9.64101
69.8	-5.59087	-9.89735	-0.026795	-6.97169	-9.40931	-13.1441		69.8	-6.50854	-7.39801	-1.7607	-5.3211	-10.7869	-9.54007
69.9	-5.98383	-8.61921	1.00681	-5.64148	-10.4465	-11.5562		69.9	-6.1516	-7.73793	-1.76577	-5.31267	-10.1538	-9.52124
70	-6.5008	-7.45332	1.53532	-4.26978	-11.4208	-9.72074		70	-5.7503	-8.02152	-1.74068	-5.27253	-9.4531	-9.56633
70.1	-6.93037	-6.56345	1.39484	-3.07754	-11.9976	-8.11294		70.1	-5.3832	-8.18242	-1.67412	-5.13932	-8.77157	-9.62242
70.2	-7.04579	-5.97655	0.645732	-2.28469	-11.9624	-7.03799		70.2	-5.10576	-8.16342	-1.55798	-4.88883	-8.19284	-9.60683
70.3	-6.68516	-5.67945	-0.489313	-2.06634	-11.2528	-6.55187		70.3	-4.94265	-7.93637	-1.39174	-4.53964	-7.77278	-9.43483
70.4	-5.82364	-5.70412	-1.72365	-2.45788	-9.93469	-6.52771		70.4	-4.8901	-7.51508	-1.18926	-4.14365	-7.5205	-9.05453
70.5	-4.60485	-6.1014	-2.78458	-3.26878	-8.15853	-6.79231		70.5	-4.92187	-6.95348	-0.983522	-3.76847	-7.39535	-8.47202
70.6	-3.34377	-6.84063	-3.47399	-4.12793	-6.14909	-7.25179		70.6	-4.99468	-6.32822	-0.820589	-3.47762	-7.3233	-7.75286
70.7	-2.41121	-7.71517	-3.7109	-4.62241	-4.21956	-7.88507		70.7	-5.05605	-5.71277	-0.745019	-3.3142	-7.22356	-6.99899
70.8	-2.06739	-8.37734	-3.49785	-4.49805	-2.74381	-8.612		70.8	-5.05479	-5.15651	-0.782093	-3.29264	-7.03214	-6.31417
70.9	-2.3557	-8.4521	-2.88249	-3.79888	-2.06059	-9.16442		70.9	-4.9514	-4.67771	-0.923486	-3.40212	-6.7162	-5.77374
71	-3.13568	-7.70033	-1.96211	-2.85151	-2.33152	-9.12899		71	-4.72686	-4.27078	-1.12462	-3.61493	-6.27575	-5.40725
71.1	-4.20021	-6.12928	-0.861504	-2.08455	-3.44095	-8.18649		71.1	-4.38721	-3.92018	-1.31821	-3.89154	-5.74006	-5.19907
71.2	-5.30902	-4.04968	0.246724	-1.82638	-4.99946	-6.34009		71.2	-3.96421	-3.60819	-1.43431	-4.18218	-5.1601	-5.1015
71.3	-6.21655	-1.96714	1.12103	-2.19636	-6.49212	-3.99307		71.3	-3.51284	-3.31424	-1.41735	-4.43082	-4.59966	-5.05304
71.4	-6.70466	-0.353193	1.5127	-3.0753	-7.4765	-1.79285		71.4	-3.10194	-3.01192	-1.23874	-4.58606	-4.12844	-4.99359
71.5	-6.63419	0.56531	1.2579	-4.19353	-7.7138	-0.328342		71.5	-2.7948	-2.67114	-0.902822	-4.61321	-3.81214	-4.87165
71.6	-5.96249	0.837213	0.376545	-5.27495	-7.19225	0.0857871		71.6	-2.62506	-2.26903	-0.44333	-4.50511	-3.69563	-4.64878
71.7	-4.74312	0.686266	-0.868355	-6.13088	-6.04976	-0.533408		71.7	-2.58127	-1.80447	0.0858589	-4.28523	-3.7831	-4.30809
71.8	-3.11314	0.354295	-2.02448	-6.69534	-4.50987	-1.88262		71.8	-2.60966	-1.30772	0.623349	-3.99824	-4.02901	-3.86796
71.9	-1.27169	-0.0163235	-2.64534	-6.98711	-2.8557	-3.49892		71.9	-2.63389	-0.835606	1.11743	-3.69195	-4.34856	-3.38813
72	0.505756	-0.375603	-2.46295	-7.00724	-1.39348	-4.89315		72	-2.57972	-0.453984	1.538	-3.40343	-4.64372	-2.95718
72.1	1.84967	-0.706893	-1.43536	-6.68465	-0.407285	-5.70403		72.1	-2.40085	-0.211142	1.8788	-3.15329	-4.83247	-2.66583
72.2	2.38048	-0.962116	0.251829	-5.90787	-0.147807	-5.78154		72.2	-2.09496	-0.116779	2.15305	-2.94417	-4.87014	-2.57456
72.3	1.87759	-1.04728	2.23663	-4.5895	-0.771969	-5.17887		72.3	-1.70384	-0.138047	2.38899	-2.76361	-4.75738	-2.69217
72.4	0.474305	-0.87936	4.10046	-2.78476	-2.23886	-4.09626		72.4	-1.29727	-0.214159	2.62744	-2.59228	-4.53417	-2.97569
72.5	-1.32294	-0.479734	5.49837	-0.760068	-4.23082	-2.8202		72.5	-0.951448	-0.27909	2.91533	-2.41344	-4.26571	-3.34799
72.6	-2.83829	-0.00731628	6.25484	1.07985	-6.24099	-1.68235		72.6	-0.729188	-0.282809	3.29212	-2.21981	-4.02902	-3.72052
72.7	-3.54754	0.325533	6.43731	2.3555	-7.76383	-0.971852		72.7	-0.667132	-0.200108	3.7715	-2.01413	-3.89806	-4.01523
72.8	-3.27933	0.358301	6.28819	2.82028	-8.45883	-0.860258		72.8	-0.772955	-0.0273416	4.33069	-1.80417	-3.92389	-4.18159
72.9	-2.26834	0.0786276	6.04035	2.42606	-8.20822	-1.38726		72.9	-1.0291	0.222629	4.91113	-1.59863	-4.11805	-4.20869
73	-1.01634	-0.362975	5.78327	1.35857	-7.13247	-2.44147		73	-1.39372	0.525212	5.42996	-1.40593	-4.44603	-4.1262
73.1	-0.0556179	-0.714751	5.52361	-0.00581238	-5.55949	-3.79211		73.1	-1.79756	0.848317	5.80222	-1.23791	-4.83525	-3.99505
73.2	0.277455	-0.728592	5.3115	-1.28081	-3.91921	-5.14821		73.2	-2.14819	1.15695	5.96996	-1.11583	-5.19225	-3.88937
73.3	-0.083533	-0.266614	5.27068	-2.23462	-2.62842	-6.24328		73.3	-2.35146	1.41641	5.92245	-1.07321	-5.42676	-3.87416
73.4	-0.964697	0.623039	5.53716	-2.83933	-2.02606	-6.86646		73.4	-2.34269	1.59643	5.69579	-1.14708	-5.47341	-3.98562
73.5	-2.05818	1.76022	6.12494	-3.19869	-2.28356	-6.89267		73.5	-2.11157	1.67543	5.3559	-1.36014	-5.30365	-4.22137
73.6	-3.07067	2.9207	6.86093	-3.41787	-3.29488	-6.327		73.6	-1.70628	1.64441	4.97082	-1.70333	-4.93014	-4.54678
73.7	-3.84875	3.8739	7.40447	-3.51298	-4.69407	-5.35386		73.7	-1.2159	1.51333	4.58932	-2.12759	-4.4045	-4.91041
73.8	-4.3488	4.43701	7.38479	-3.40871	-5.98307	-4.30183		73.8	-0.738427	1.31474	4.23638	-2.55312	-3.80846	-5.25561
73.9	-4.48482	4.53067	6.58025	-3.0516	-6.7645	-3.55193		73.9	-0.349939	1.09739	3.923	-2.89547	-3.23632	-5.52948
74	-4.0831	4.19954	5.08816	-2.51412	-6.84094	-3.38236		74	-0.0855331	0.909068	3.65508	-3.0952	-2.77167	-5.68887
74.1	-2.9813	3.53147	3.29291	-2.06017	-6.22562	-3.83771		74.1	0.0626111	0.776282	3.43214	-3.13444	-2.4655	-5.70451
74.2	-1.17392	2.58062	1.64515	-2.01584	-5.02372	-4.71496		74.2	0.134732	0.693275	3.242	-3.03535	-2.32445	-5.56682
74.3	1.09087	1.33559	0.476696	-2.54224	-3.35521	-5.69002		74.3	0.184181	0.627333	3.05612	-2.84614	-2.31037	-5.29449
74.4	3.34228	-0.2018	-0.109065	-3.47867	-1.41414	-6.50383		74.4	0.257509	0.534119	2.83311	-2.62408	-2.35266	-4.93652
74.5	5.05721	-1.87008	-0.197299	-4.39213	0.477127	-7.04195		74.5	0.383098	0.376597	2.53156	-2.42403	-2.37314	-4.55929
74.6	5.84866	-3.29736	0.0403125	-4.80794	1.92442	-7.25567		74.6	0.571567	0.140112	2.12922	-2.29343	-2.31149	-4.22383
74.7	5.58794	-4.05791	0.455811	-4.46142	2.59385	-7.09731		74.7	0.821546	-0.164415	1.63701	-2.26827	-2.13948	-3.96632
74.8	4.43929	-3.91626	0.968958	-3.40119	2.33969	-6.50174		74.8	1.12082	-0.507121	1.10014	-2.36434	-1.86153	-3.78807
74.9	2.79591	-2.98594	1.52158	-1.94791	1.28564	-5.41416		74.9	1.44381	-0.850252	0.580892	-2.57037	-1.50842	-3.65634
75	1.14252	-1.67773	2.03833	-0.550211	-0.230581	-3.90255		75	1.75179	-1.15721	0.135181	-2.84406	-1.12613	-3.51723
75.1	-0.124062	-0.497983	2.37715	0.377284	-1.78678	-2.23682		75.1	1.99756	-1.39714	-0.203157	-3.11631	-0.765432	-3.31688
75.2	-0.811601	0.175593	2.33366	0.576441	-3.00244	-0.807053		75.2	2.13565	-1.54478	-0.425346	-3.30727	-0.474835	-3.02098
75.3	-0.935665	0.24282	1.73474	-0.0170124	-3.64299	0.0858044		75.3	2.13588	-1.58148	-0.541966	-3.34931	-0.292792	-2.62213
75.4	-0.644782	-0.146346	0.564561	-1.29294	-3.64611	0.349046		75.4	1.995	-1.50394	-0.574723	-3.21199	-0.238008	-2.13628
75.5	-0.0991415	-0.739935	-0.98274	-2.98086	-3.05877	0.0757535		75.5	1.74294	-1.33761	-0.55072	-2.91545	-0.302832	-1.59747
75.6	0.602908	-1.29534	-2.54652	-4.68482	-2.03942	-0.521706		75.6	1.43873	-1.14097	-0.501705	-2.52171	-0.452683	-1.05151
75.7	1.40764	-1.63369	-3.73905	-6.0167	-0.838105	-1.14289		75.7	1.1541	-0.992532	-0.462875	-2.11031	-0.631848	-0.551158
75.8	2.25436	-1.68676	-4.28417	-6.7128	0.273258	-1.47293		75.8	0.951969	-0.963251	-0.463245	-1.75025	-0.778912	-0.151979
75.9	3.00419	-1.49828	-4.1066	-6.64417	1.10824	-1.30895		75.9	0.868751	-1.08979	-0.515325	-1.47922	-0.843182	0.0950133
76	3.43838	-1.17432	-3.30052	-5.78855	1.58493	-0.659789		76	0.909426	-1.36008	-0.605545	-1.29611	-0.799367	0.158093
76.1	3.34626	-0.825636	-2.0916	-4.19327	1.68059	0.276686		76.1	1.05179	-1.71593	-0.691589	-1.16594	-0.654312	0.0401062
76.2	2.66212	-0.551981	-0.754165	-2.05784	1.40846	1.21745		76.2	1.25613	-2.07369	-0.70954	-1.03372	-0.442295	-0.217399
76.3	1.56379	-0.46959	0.448354	0.233317	0.822396	1.9042		76.3	1.47663	-2.35425	-0.589376	-0.839504	-0.212219	-0.545299
76.4	0.416309	-0.71518	1.28906	2.23219	0.0463833	2.18405		76.4	1.67025	-2.50666	-0.27709	-0.534866	-0.0157891	-0.865973
76.5	-0.399429	-1.39274	1.62907	3.59249	-0.706112	2.00416		76.5	1.80247	-2.51974	0.243	-0.101127	0.104638	-1.11364
76.6	-0.640324	-2.48816	1.51529	4.17325	-1.21445	1.37187		76.6	1.85185	-2.42039	0.939003	0.443496	0.125687	-1.25204
76.7	-0.272186	-3.82884	1.15298	4.05724	-1.32317	0.296324		76.7	1.81246	-2.25986	1.73967	1.05043	0.0474904	-1.28339
76.8	0.567413	-5.0929	0.843399	3.49011	-1.04193	-1.16448		76.8	1.69745	-2.09477	2.55564	1.65463	-0.108555	-1.2422
76.9	1.60852	-5.87387	0.87091	2.78941	-0.536504	-2.81282		76.9	1.54266	-1.97133	3.30497	2.18645	-0.305853	-1.17867
77	2.53813	-5.83922	1.42957	2.23064	-0.038697	-4.29178		77	1.40536	-1.91577	3.93467	2.57794	-0.497227	-1.14037
77.1	3.10378	-4.91585	2.60735	2.00878	0.265184	-5.22527		77.1	1.35212	-1.93275	4.42936	2.77217	-0.628896	-1.15892
77.2	3.19242	-3.33092	4.32613	2.19799	0.280535	-5.3757		77.2	1.43721	-2.00603	4.8078	2.737	-0.64475	-1.24244
77.3	2.85062	-1.51765	6.29501	2.68874	0.00782966	-4.73201		77.3	1.67983	-2.10049	5.11045	2.47627	-0.496169	-1.37842
77.4	2.2471	0.0552317	8.09298	3.2419	-0.480269	-3.49565		77.4	2.05224	-2.16646	5.38234	2.03357	-0.158145	-1.54073
77.5	1.5848	1.04223	9.32714	3.60501	-1.05608	-2.00591		77.5	2.48667	-2.14688	5.65626	1.48661	0.357749	-1.69648
77.6	1.04894	1.30822	9.7649	3.62737	-1.54453	-0.608713		77.6	2.89747	-1.98818	5.9463	0.930361	0.999728	-1.80786
77.7	0.806977	0.924263	9.43819	3.25239	-1.76913	0.420122		77.7	3.20659	-1.65693	6.24912	0.452576	1.69025	-1.83388
77.8	1.01224	0.118836	8.61315	2.46192	-1.57277	0.927824		77.8	3.36512	-1.15674	6.55046	0.110736	2.34828	-1.73839
77.9	1.75687	-0.840606	7.65566	1.24415	-0.82992	0.902107		77.9	3.36395	-0.535432	6.82694	-0.0806161	2.91096	-1.50494
78	3.01046	-1.71539	6.88185	-0.364612	0.552879	0.484444		78	3.23281	0.125176	7.03997	-0.149627	3.34361	-1.1467
78.1	4.54085	-2.32092	6.4341	-2.20024	2.57226	-0.127723		78.1	3.02985	0.732999	7.13574	-0.152159	3.64051	-0.707592
78.2	5.93146	-2.51423	6.25114	-3.93333	5.0403	-0.755117		78.2	2.82345	1.21199	7.05927	-0.146254	3.81996	-0.252831
78.3	6.74502	-2.15542	6.17199	-5.1251	7.55575	-1.27589		78.3	2.67267	1.51971	6.77526	-0.170983	3.91604	0.147786
78.4	6.71148	-1.13087	6.08366	-5.39899	9.59047	-1.59713		78.4	2.61417	1.65073	6.28432	-0.238616	3.96799	0.43972
78.5	5.82229	0.538313	5.99134	-4.63223	10.6969	-1.60666		78.5	2.65782	1.63015	5.6278	-0.343061	4.00666	0.595831
78.6	4.30354	2.62931	5.99369	-3.02188	10.65	-1.18963		78.6	2.78723	1.50243	4.87516	-0.471035	4.04419	0.619736
78.7	2.51831	4.72309	6.12971	-1.02235	9.52692	-0.323144		78.7	2.96466	1.31704	4.10147	-0.604119	4.07296	0.540854
78.8	0.874365	6.31449	6.22879	0.835602	7.62014	0.864813		78.8	3.1367	1.11908	3.368	-0.713447	4.07126	0.400625
78.9	-0.257843	7.00207	5.95431	2.15494	5.32793	2.08921		78.9	3.24057	0.944963	2.7133	-0.757674	4.00568	0.23746
79	-0.658244	6.62524	4.99499	2.78912	3.05845	2.99892		79	3.21733	0.8197	2.15446	-0.692094	3.83295	0.0792194
79.1	-0.316151	5.28637	3.26489	2.82151	1.15311	3.31483		79.1	3.02974	0.752657	1.69361	-0.488385	3.50888	-0.0580398
79.2	0.590374	3.26961	0.981132	2.45526	-0.172952	2.95699		79.2	2.67383	0.733856	1.32319	-0.154819	3.00615	-0.168442
79.3	1.7909	0.958377	-1.39597	1.85179	-0.887178	2.04518		79.3	2.18064	0.73185	1.02488	0.257139	2.33223	-0.255393
79.4	3.00701	-1.24691	-3.35672	1.07683	-1.13107	0.826499		79.4	1.60887	0.697735	0.765503	0.66518	1.53746	-0.335818
79.5	4.02856	-3.03289	-4.53962	0.199498	-1.08368	-0.413171		79.5	1.03062	0.575235	0.498093	0.98028	0.710494	-0.443758
79.6	4.68161	-4.20593	-4.81325	-0.614421	-0.858857	-1.48178		79.6	0.513588	0.317373	0.177294	1.13116	-0.0421578	-0.62485
79.7	4.77609	-4.67533	-4.24813	-1.11647	-0.561897	-2.28936		79.7	0.103686	-0.0937862	-0.218205	1.08229	-0.624352	-0.923664
79.8	4.14579	-4.4504	-3.06609	-1.08538	-0.364164	-2.81782		79.8	-0.186815	-0.634714	-0.671933	0.839583	-0.977309	-1.36717
79.9	2.74255	-3.65396	-1.58335	-0.47029	-0.468943	-3.08852		79.9	-0.380373	-1.24471	-1.13157	0.443939	-1.09447	-1.95064
80	0.694453	-2.47504	-0.125212	0.545535	-0.990546	-3.15273		80	-0.523301	-1.84322	-1.52496	-0.0429826	-1.0202	-2.63118
80.1	-1.67269	-1.16496	1.01253	1.60429	-1.86619	-3.0753		80.1	-0.669508	-2.35037	-1.77977	-0.554636	-0.835075	-3.33574
80.2	-3.89786	-0.0416496	1.58186	2.30447	-2.81421	-2.97388		80.2	-0.866656	-2.70508	-1.8437	-1.03093	-0.630492	-3.98164
80.3	-5.52668	0.546819	1.44772	2.33483	-3.40845	-3.02461		80.3	-1.14841	-2.87828	-1.70295	-1.4251	-0.482701	-4.49871
80.4	-6.27122	0.339429	0.676125	1.54257	-3.26816	-3.40171		80.4	-1.53124	-2.87827	-1.38958	-1.71005	-0.438981	-4.84575
80.5	-6.09397	-0.675208	-0.494697	0.00477549	-2.27716	-4.21503		80.5	-2.01158	-2.74779	-0.973464	-1.88402	-0.516796	-5.01537
80.6	-5.19637	-2.1937	-1.75906	-1.971	-0.672345	-5.45032		80.6	-2.56187	-2.55303	-0.543106	-1.97361	-0.703869	-5.0316
80.7	-3.94872	-3.74464	-2.81886	-3.93682	1.06671	-6.92022		80.7	-3.13001	-2.36881	-0.18145	-2.02915	-0.953851	-4.93853
80.8	-2.74593	-4.88843	-3.42278	-5.45616	2.41569	-8.25432		80.8	-3.64807	-2.26254	0.0566759	-2.11289	-1.19091	-4.78523
80.9	-1.89514	-5.35185	-3.35064	-6.24286	2.97418	-9.02049		80.9	-4.04571	-2.28485	0.157872	-2.2814	-1.32835	-4.61437
81	-1.56062	-5.0718	-2.4828	-6.24526	2.59073	-8.93517		81	-4.26727	-2.46328	0.150329	-2.56425	-1.29257	-4.45595
81.1	-1.78277	-4.19115	-0.96395	-5.62408	1.38137	-7.96371		81.1	-4.28942	-2.79619	0.0908494	-2.94925	-1.04707	-4.32292
81.2	-2.47967	-3.03286	0.78768	-4.64459	-0.340442	-6.31276		81.2	-4.12901	-3.24866	0.0469177	-3.3814	-0.610174	-4.21024
81.3	-3.48412	-1.98768	2.26077	-3.57197	-2.1817	-4.36526		81.3	-3.83689	-3.75728	0.077259	-3.77649	-0.054569	-4.09537
81.4	-4.57881	-1.36438	3.06796	-2.63933	-3.74215	-2.56538		81.4	-3.48106	-4.24686	0.218781	-4.04711	0.513456	-3.93881
81.5	-5.51266	-1.31875	3.08207	-2.02965	-4.61386	-1.23562		81.5	-3.12477	-4.65145	0.482296	-4.13244	0.986941	-3.69175
81.6	-6.06442	-1.84741	2.46478	-1.89385	-4.49891	-0.48235		81.6	-2.80863	-4.9326	0.852905	-4.01764	1.29143	-3.31147
81.7	-6.06544	-2.8543	1.59512	-2.3192	-3.32707	-0.248087		81.7	-2.54173	-5.08799	1.29301	-3.73629	1.40476	-2.78234
81.8	-5.43923	-4.1982	0.884292	-3.2041	-1.25798	-0.382182		81.8	-2.302	-5.14769	1.74637	-3.35687	1.35779	-2.13288
81.9	-4.27442	-5.70115	0.570719	-4.24051	1.35938	-0.712344		81.9	-2.04611	-5.16329	2.14555	-2.95961	1.21783	-1.43558
82	-2.79968	-7.14511	0.700881	-5.01169	4.01874	-1.10913		82	-1.72389	-5.19161	2.42613	-2.6135	1.06531	-0.790056
82.1	-1.30519	-8.30723	1.19193	-5.17401	6.17712	-1.44893		82.1	-1.29514	-5.27491	2.54214	-2.36201	0.969347	-0.294525
82.2	-0.0448652	-8.99804	1.91118	-4.59579	7.37926	-1.55356		82.2	-0.742764	-5.42608	2.48052	-2.21833	0.970573	-0.0143457
82.3	0.860631	-9.07165	2.72068	-3.42156	7.37691	-1.25022		82.3	-0.0787957	-5.62681	2.26856	-2.16845	1.075	0.0389717
82.4	1.42561	-8.52422	3.4815	-1.98526	6.24309	-0.455415		82.4	0.654809	-5.83682	1.96741	-2.18104	1.25579	-0.0936078
82.5	1.79138	-7.53007	4.05907	-0.673259	4.34226	0.740839		82.5	1.39258	-6.00949	1.65367	-2.21678	1.46401	-0.339755
82.6	2.18032	-6.36675	4.35647	0.207299	2.17571	2.0204		82.6	2.05465	-6.10556	1.39487	-2.23476	1.64227	-0.623553
82.7	2.78939	-5.33694	4.30324	0.50823	0.211443	2.91891		82.7	2.56254	-6.10124	1.23111	-2.19984	1.73513	-0.889298
82.8	3.69505	-4.67254	3.80591	0.259829	-1.21153	3.01016		82.8	2.85869	-5.98866	1.17036	-2.0896	1.69577	-1.11164
82.9	4.80898	-4.44907	2.75985	-0.36938	-1.97183	2.11126		82.9	2.92127	-5.77337	1.19235	-1.90225	1.49256	-1.29118
83	5.90635	-4.55749	1.21316	-1.12939	-2.16086	0.39778		83	2.76972	-5.47389	1.25858	-1.66136	1.11911	-1.44621
83.1	6.70865	-4.77677	-0.535272	-1.79137	-1.96683	-1.65899		83.1	2.45904	-5.12642	1.32312	-1.41033	0.603959	-1.60869
83.2	6.95863	-4.88905	-2.03756	-2.24365	-1.54044	-3.48947		83.2	2.06264	-4.78807	1.3429	-1.19566	0.010496	-1.82056
83.3	6.47767	-4.7827	-2.86881	-2.50139	-0.959153	-4.66685		83.3	1.651	-4.52743	1.28678	-1.05015	-0.579629	-2.12936
83.4	5.18983	-4.48753	-2.80445	-2.62489	-0.296676	-5.07265		83.4	1.27173	-4.40343	1.14063	-0.983741	-1.09291	-2.57688
83.5	3.19485	-4.12475	-1.89971	-2.61044	0.320662	-4.89985		83.5	0.937353	-4.44596	0.907087	-0.984728	-1.48624	-3.18158
83.6	0.760072	-3.78733	-0.461914	-2.36641	0.69018	-4.49211		83.6	0.626058	-4.64474	0.603111	-1.02766	-1.7555	-3.92209
83.7	-1.73577	-3.48511	1.07463	-1.8268	0.564216	-4.16132		83.7	0.294117	-4.95125	0.260646	-1.08229	-1.93091	-4.73367
83.8	-3.88163	-3.21608	2.31792	-1.0789	-0.171571	-4.08451		83.8	-0.103992	-5.2949	-0.071397	-1.12084	-2.06086	-5.52381
83.9	-5.32638	-3.09116	3.00841	-0.328234	-1.37827	-4.3156		83.9	-0.597495	-5.60928	-0.334977	-1.12397	-2.1925	-6.20212
84	-5.87813	-3.3196	3.05681	0.227758	-2.71196	-4.85207		84	-1.18807	-5.8533	-0.483772	-1.0844	-2.35969	-6.7104
84.1	-5.57221	-4.09336	2.52751	0.488521	-3.78903	-5.70499		84.1	-1.84745	-6.0186	-0.506982	-1.00613	-2.58017	-7.03898
84.2	-4.65634	-5.42215	1.57446	0.455629	-4.38353	-6.86704		84.2	-2.52216	-6.12359	-0.441712	-0.899764	-2.86024	-7.22158
84.3	-3.50402	-7.08975	0.386307	0.19052	-4.51093	-8.25953		84.3	-3.13941	-6.19766	-0.366766	-0.779924	-3.19936	-7.31403
84.4	-2.50263	-8.71609	-0.864348	-0.221553	-4.36593	-9.66981		84.4	-3.62018	-6.2664	-0.377418	-0.667956	-3.59184	-7.36906
84.5	-1.94795	-9.88328	-2.01598	-0.669005	-4.19356	-10.7866		84.5	-3.8955	-6.34863	-0.550239	-0.598489	-4.02051	-7.42057
84.6	-1.95888	-10.2911	-2.88489	-1.02473	-4.18092	-11.3211		84.6	-3.92353	-6.45906	-0.91396	-0.616477	-4.44731	-7.48386
84.7	-2.48318	-9.90197	-3.2677	-1.18256	-4.39875	-11.1336		84.7	-3.70156	-6.60701	-1.4425	-0.763956	-4.81609	-7.5631
84.8	-3.33118	-8.92511	-3.06479	-1.11874	-4.80908	-10.2997		84.8	-3.27193	-6.78751	-2.06944	-1.06277	-5.06786	-7.65488
84.9	-4.25085	-7.69909	-2.43214	-0.912925	-5.2886	-9.07524		84.9	-2.71805	-6.9712	-2.71203	-1.50219	-5.16302	-7.74976
85	-4.99225	-6.56758	-1.75921	-0.693229	-5.72025	-7.77113		85	-2.14813	-7.10375	-3.29479	-2.03843	-5.09886	-7.83232
85.1	-5.30347	-5.74677	-1.53038	-0.587616	-6.06184	-6.64435		85.1	-1.67159	-7.12274	-3.76339	-2.60806	-4.91169	-7.88116
85.2	-4.97832	-5.29336	-2.08079	-0.706972	-6.3515	-5.83523		85.2	-1.37392	-6.98222	-4.0907	-3.14899	-4.66371	-7.86764
85.3	-3.92037	-5.18507	-3.39986	-1.18547	-6.59711	-5.36789		85.3	-1.29744	-6.6743	-4.27657	-3.61665	-4.4212	-7.76098
85.4	-2.21218	-5.36255	-5.10864	-2.13259	-6.69135	-5.2373		85.4	-1.43273	-6.23803	-4.34375	-3.99212	-4.23169	-7.53841
85.5	-0.108261	-5.73111	-6.66724	-3.58605	-6.44083	-5.43147		85.5	-1.72518	-5.75032	-4.3341	-4.28416	-4.11005	-7.19453
85.6	1.97747	-6.15971	-7.64959	-5.40812	-5.6585	-5.87589		85.6	-2.09492	-5.30169	-4.30576	-4.52327	-4.03908	-6.74583
85.7	3.53783	-6.4424	-7.86721	-7.24227	-4.32967	-6.46509		85.7	-2.46295	-4.96977	-4.32372	-4.74897	-3.9835	-6.23079
85.8	4.11638	-6.34668	-7.37941	-8.62766	-2.69824	-7.10852		85.8	-2.77193	-4.79936	-4.44079	-4.99303	-3.90598	-5.70255
85.9	3.44483	-5.745	-6.39174	-9.22803	-1.2017	-7.6972		85.9	-2.99578	-4.79464	-4.67593	-5.26848	-3.77522	-5.21665
86	1.5563	-4.70088	-5.17798	-9.00525	-0.295163	-8.02977		86	-3.14228	-4.9263	-4.99981	-5.56943	-3.56673	-4.81853
86.1	-1.20246	-3.48142	-4.0241	-8.17186	-0.243326	-7.8566		86.1	-3.24818	-5.14667	-5.34098	-5.87812	-3.26283	-4.53376
86.2	-4.24783	-2.46666	-3.15815	-7.05203	-0.971861	-7.00297		86.2	-3.36962	-5.40576	-5.6132	-6.17213	-2.85772	-4.3622
86.3	-6.93044	-2.00017	-2.7208	-5.9894	-2.11312	-5.47507		86.3	-3.56889	-5.66439	-5.74982	-6.42669	-2.36404	-4.27439
86.4	-8.76881	-2.27511	-2.78589	-5.24731	-3.19222	-3.5057		86.4	-3.90163	-5.90157	-5.72644	-6.6094	-1.81747	-4.21762
86.5	-9.58767	-3.28262	-3.3701	-4.95566	-3.86421	-1.54408		86.5	-4.40263	-6.11454	-5.56284	-6.67929	-1.27669	-4.13455
86.6	-9.50361	-4.80207	-4.42231	-5.06201	-3.97069	-0.0951109		86.6	-5.06817	-6.31548	-5.31023	-6.59803	-0.813139	-3.98106
86.7	-8.79766	-6.48728	-5.7566	-5.37583	-3.49738	0.489239		86.7	-5.84727	-6.5236	-5.03152	-6.3486	-0.491646	-3.73645
86.8	-7.79405	-7.98501	-7.03629	-5.70375	-2.51746	0.123628		86.8	-6.64777	-6.75517	-4.78514	-5.94904	-0.350598	-3.40553
86.9	-6.77859	-9.03969	-7.88084	-5.95481	-1.18534	-0.994217		86.9	-7.3597	-7.0215	-4.61252	-5.45067	-0.385759	-3.01596
87	-5.9848	-9.58955	-8.02748	-6.18349	0.289769	-2.45134		87	-7.88752	-7.33433	-4.52985	-4.92303	-0.548177	-2.61291
87.1	-5.59981	-9.7592	-7.43122	-6.46023	1.70133	-3.74443		87.1	-8.17741	-7.70883	-4.52918	-4.43308	-0.759904	-2.25448
87.2	-5.76479	-9.76324	-6.26974	-6.69208	2.85083	-4.46652		87.2	-8.23052	-8.15639	-4.58682	-4.02555	-0.940203	-2.00325
87.3	-6.53948	-9.78016	-4.86848	-6.59626	3.53473	-4.46354		87.3	-8.09742	-8.66816	-4.66964	-3.71335	-1.02968	-1.91092
87.4	-7.77644	-9.85841	-3.57284	-5.86081	3.55068	-3.85587		87.4	-7.85872	-9.2054	-4.73621	-3.48023	-1.00429	-1.9976
87.5	-9.12828	-9.88475	-2.6413	-4.38748	2.76714	-2.95004		87.5	-7.60213	-9.7095	-4.7371	-3.29402	-0.880444	-2.2386
87.6	-10.1637	-9.6816	-2.20323	-2.43547	1.19611	-2.07158		87.6	-7.40316	-10.1232	-4.62209	-3.12285	-0.70989	-2.56719
87.7	-10.5466	-9.22862	-2.24342	-0.533007	-0.892898	-1.40714		87.7	-7.31063	-10.4104	-4.35713	-2.94437	-0.564666	-2.89317
87.8	-10.1754	-8.79945	-2.61874	0.79806	-3.00443	-1.00474		87.8	-7.33813	-10.5668	-3.94133	-2.74736	-0.515199	-3.13174
87.9	-9.17582	-8.83323	-3.14672	1.27714	-4.57121	-0.909711		87.9	-7.46165	-10.6155	-3.41423	-2.52647	-0.61127	-3.22962
88	-7.83342	-9.6087	-3.70077	0.938704	-5.1782	-1.20405		88	-7.62672	-10.5918	-2.84843	-2.28084	-0.870858	-3.17876
88.1	-6.50599	-10.9752	-4.19375	0.0599614	-4.71328	-1.93615		88.1	-7.76212	-10.5283	-2.33071	-2.02287	-1.27708	-3.0123
88.2	-5.5299	-12.4156	-4.50176	-0.992594	-3.43255	-3.01762		88.2	-7.79411	-10.4478	-1.93765	-1.78771	-1.78076	-2.78524
88.3	-5.14147	-13.3718	-4.43744	-1.89646	-1.8654	-4.19217		88.3	-7.66386	-10.367	-1.71489	-1.63351	-2.30481	-2.55075
88.4	-5.41524	-13.5196	-3.80153	-2.4658	-0.597968	-5.09671		88.4	-7.34144	-10.3048	-1.66549	-1.62712	-2.75388	-2.34426
88.5	-6.22109	-12.8684	-2.53193	-2.66959	-0.0486423	-5.41809		88.5	-6.83271	-10.2849	-1.75062	-1.8175	-3.03039	-2.18069
88.6	-7.24595	-11.6987	-0.812235	-2.60579	-0.344405	-5.04989		88.6	-6.17969	-10.3241	-1.90366	-2.21007	-3.0587	-2.06284
88.7	-8.08472	-10.4166	0.93329	-2.42827	-1.34344	-4.1153		88.7	-5.45421	-10.4076	-2.05272	-2.75682	-2.80718	-1.98965
88.8	-8.406	-9.35658	2.18735	-2.28451	-2.71166	-2.87982		88.8	-4.74399	-10.4746	-2.1407	-3.36755	-2.30182	-1.95449
88.9	-8.06658	-8.68377	2.53147	-2.30669	-4.05488	-1.63666		88.9	-4.12996	-10.433	-2.13414	-3.93956	-1.62545	-1.93648
89	-7.08334	-8.41167	1.8136	-2.59844	-5.02794	-0.603583		89	-3.66039	-10.1967	-2.02519	-4.39313	-0.902299	-1.89801
89.1	-5.56212	-8.48493	0.21394	-3.23952	-5.35809	0.130467		89.1	-3.33433	-9.72733	-1.83125	-4.69388	-0.267183	-1.7943
89.2	-3.64717	-8.82672	-1.80143	-4.27875	-4.86704	0.560269		89.2	-3.10364	-9.05157	-1.59374	-4.85507	0.173094	-1.59043
89.3	-1.51537	-9.34433	-3.65041	-5.67197	-3.50461	0.709163		89.3	-2.8946	-8.25233	-1.37719	-4.92159	0.371392	-1.28074
89.4	0.554899	-9.89473	-4.84518	-7.20661	-1.3741	0.596253		89.4	-2.63737	-7.43868	-1.25836	-4.94821	0.35039	-0.896903
89.5	2.15776	-10.218	-5.15275	-8.49669	1.27139	0.239591		89.5	-2.291	-6.70997	-1.3062	-4.98137	0.1892	-0.496703
89.6	2.89785	-9.97356	-4.64235	-9.10532	4.01992	-0.311979		89.6	-1.85358	-6.13025	-1.55693	-5.05208	-0.00579012	-0.142367
89.7	2.60508	-8.90003	-3.58918	-8.78548	6.32006	-0.897962		89.7	-1.35354	-5.71927	-1.99703	-5.17528	-0.136503	0.120847
89.8	1.47667	-6.95945	-2.34175	-7.65066	7.58026	-1.28206		89.8	-0.830755	-5.45781	-2.56184	-5.35125	-0.141942	0.275921
89.9	0.0132121	-4.43574	-1.20476	-6.10543	7.36442	-1.25466		89.9	-0.323557	-5.30036	-3.15265	-5.56804	-0.0107948	0.3319
90	-1.21985	-1.88386	-0.399756	-4.6367	5.61932	-0.726373		90	0.134053	-5.18777	-3.66561	-5.80027	0.219113	0.314318
90.1	-1.86157	0.0674552	-0.12017	-3.59666	2.7731	0.168033		90.1	0.506712	-5.0604	-4.02268	-6.00789	0.475017	0.256148
90.2	-1.84807	0.963672	-0.511855	-3.12215	-0.405675	1.10716		90.2	0.753781	-4.87306	-4.191	-6.14237	0.670511	0.190888
90.3	-1.35766	0.689387	-1.62547	-3.16946	-3.08464	1.75351		90.3	0.838461	-4.6079	-4.18603	-6.16276	0.726402	0.146676
90.4	-0.648601	-0.56142	-3.32916	-3.63032	-4.65827	1.90842		90.4	0.747019	-4.28516	-4.06182	-6.05722	0.582787	0.143867
90.5	0.0947515	-2.36992	-5.29437	-4.37897	-4.93377	1.59481		90.5	0.50266	-3.96384	-3.89266	-5.85726	0.208432	0.192247
90.6	0.82069	-4.23884	-7.07024	-5.29815	-4.14735	0.999598		90.6	0.162033	-3.72716	-3.75292	-5.62958	-0.385828	0.285092
90.7	1.53902	-5.73502	-8.23013	-6.2838	-2.79843	0.348059		90.7	-0.205858	-3.66003	-3.69917	-5.44807	-1.13722	0.396521
90.8	2.21724	-6.57089	-8.5064	-7.18751	-1.44965	-0.16842		90.8	-0.542935	-3.82253	-3.75763	-5.36466	-1.93581	0.485631
90.9	2.68804	-6.66141	-7.87161	-7.80823	-0.516683	-0.428619		90.9	-0.816469	-4.23011	-3.91893	-5.39182	-2.65005	0.504586
91	2.6848	-6.15959	-6.51185	-7.95823	-0.181215	-0.400267		91	-1.02119	-4.84521	-4.1419	-5.50339	-3.16731	0.411784
91.1	1.99447	-5.38705	-4.76067	-7.55313	-0.423938	-0.155342		91.1	-1.17407	-5.5831	-4.36575	-5.64883	-3.42976	0.186993
91.2	0.603246	-4.7314	-3.04129	-6.70251	-1.17007	0.19183		91.2	-1.30257	-6.33331	-4.52384	-5.77279	-3.45005	-0.156162
91.3	-1.25625	-4.51122	-1.76662	-5.70595	-2.34411	0.510486		91.3	-1.4349	-6.98565	-4.55697	-5.8296	-3.30167	-0.568048
91.4	-3.18558	-4.87646	-1.21347	-4.91496	-3.78236	0.680403		91.4	-1.59905	-7.4552	-4.42462	-5.7917	-3.08924	-0.976456
91.5	-4.77748	-5.81824	-1.42812	-4.56496	-5.19343	0.612223		91.5	-1.82567	-7.70225	-4.11581	-5.64951	-2.9116	-1.30758
91.6	-5.71709	-7.19813	-2.19859	-4.68745	-6.21159	0.26021		91.6	-2.14506	-7.74168	-3.65684	-5.40433	-2.83355	-1.50508
91.7	-5.86992	-8.81279	-3.14175	-5.09851	-6.52278	-0.404134		91.7	-2.57679	-7.63868	-3.10834	-5.06354	-2.87334	-1.54443
91.8	-5.34188	-10.3892	-3.9107	-5.49326	-6.02026	-1.4096		91.8	-3.11579	-7.48824	-2.54985	-4.64035	-3.00815	-1.43737
91.9	-4.44692	-11.5805	-4.31736	-5.59475	-4.8673	-2.71429		91.9	-3.72193	-7.3836	-2.06016	-4.15787	-3.19129	-1.22317
92	-3.54217	-12.0642	-4.31292	-5.27665	-3.4296	-4.08012		92	-4.3238	-7.38947	-1.69898	-3.65401	-3.36819	-0.952845
92.1	-2.89834	-11.6511	-3.89246	-4.59608	-2.13589	-5.09365		92.1	-4.83491	-7.52544	-1.49213	-3.17953	-3.47977	-0.67462
92.2	-2.69568	-10.3523	-3.04428	-3.73477	-1.32244	-5.34812		92.2	-5.17589	-7.76576	-1.42638	-2.78655	-3.46167	-0.423758
92.3	-3.03192	-8.43869	-1.82052	-2.88091	-1.12736	-4.62949		92.3	-5.29598	-8.05262	-1.45618	-2.51073	-3.25357	-0.217696
92.4	-3.89049	-6.40543	-0.427747	-2.11578	-1.47163	-3.00944		92.4	-5.188	-8.31509	-1.51822	-2.35694	-2.81745	-0.0550771
92.5	-5.1223	-4.81981	0.818207	-1.3941	-2.12608	-0.837367		92.5	-4.89609	-8.48548	-1.55196	-2.2984	-2.15651	0.0803494
92.6	-6.47495	-4.1039	1.62265	-0.613922	-2.80851	1.39135		92.6	-4.50881	-8.50707	-1.51648	-2.28934	-1.32548	0.217794
92.7	-7.61954	-4.38084	1.81288	0.243916	-3.29458	3.24122		92.7	-4.13359	-8.34023	-1.39609	-2.28343	-0.421717	0.398436
92.8	-8.23728	-5.48671	1.37937	1.01244	-3.43116	4.44012		92.8	-3.859	-7.97126	-1.19509	-2.25102	0.441283	0.667384
92.9	-8.08569	-7.04302	0.475299	1.36377	-3.06701	4.92166		92.9	-3.72626	-7.41987	-0.929983	-2.18749	1.1669	1.05497
93	-7.05286	-8.5966	-0.648965	0.974711	-2.03637	4.77513		93	-3.72189	-6.74156	-0.628892	-2.10845	1.70175	1.55574
93.1	-5.22707	-9.75316	-1.7201	-0.226066	-0.244722	4.18347		93.1	-3.78761	-6.02034	-0.331936	-2.0382	2.04522	2.12098
93.2	-2.94187	-10.2801	-2.48279	-1.95056	2.22055	3.37674		93.2	-3.83977	-5.34581	-0.0870329	-2.00018	2.24049	2.67077
93.3	-0.754678	-10.0948	-2.77216	-3.69224	5.02448	2.56246		93.3	-3.79111	-4.78086	0.0618651	-2.01143	2.35361	3.11999
93.4	0.71387	-9.17982	-2.53848	-4.94444	7.60472	1.93243		93.4	-3.57201	-4.33927	0.0892214	-2.08066	2.45235	3.40569
93.5	1.03681	-7.55298	-1.86423	-5.39288	9.34371	1.66131		93.5	-3.14562	-3.98753	-0.000786112	-2.20727	2.59133	3.50427
93.6	0.221202	-5.30793	-0.900299	-5.04379	9.80369	1.85782		93.6	-2.51709	-3.66563	-0.172592	-2.37797	2.80328	3.43246
93.7	-1.28562	-2.69053	0.193908	-4.1966	8.90591	2.50888		93.7	-1.7321	-3.30999	-0.367584	-2.56386	3.09279	3.23507
93.8	-2.82412	-0.119865	1.22609	-3.25249	6.95646	3.41934		93.8	-0.868107	-2.87097	-0.521791	-2.71942	3.4341	2.96676
93.9	-3.81287	1.90836	2.00397	-2.5404	4.51659	4.26096		93.9	-0.0220743	-2.32198	-0.584681	-2.78669	3.77218	2.67823
94	-3.9186	3.02838	2.34283	-2.23458	2.1923	4.71693		94	0.706311	-1.66274	-0.532545	-2.70871	4.03234	2.40879
94.1	-3.06327	3.1988	2.10352	-2.30707	0.451321	4.62732		94.1	1.23597	-0.916043	-0.375805	-2.44754	4.13768	2.1836
94.2	-1.39754	2.68709	1.28326	-2.57104	-0.447433	4.01965		94.2	1.52869	-0.121108	-0.154086	-1.99826	4.03138	2.01459
94.3	0.773609	1.87571	0.0925268	-2.76625	-0.445795	3.06718		94.3	1.60454	0.670061	0.0754304	-1.39446	3.69826	1.89889
94.4	3.06549	1.09154	-1.10783	-2.65801	0.308453	2.02049		94.4	1.53728	1.39429	0.254361	-0.704928	3.17761	1.81514
94.5	5.10746	0.559042	-1.93549	-2.14769	1.49049	1.08447		94.5	1.42645	1.98216	0.33495	-0.0175588	2.55769	1.72211
94.6	6.60226	0.420393	-2.14622	-1.28079	2.73525	0.360387		94.6	1.36202	2.36911	0.285766	0.584243	1.95093	1.56415
94.7	7.32969	0.736301	-1.71809	-0.168757	3.71103	-0.129904		94.7	1.39813	2.51212	0.0966523	1.04256	1.45945	1.28779
94.8	7.15547	1.45388	-0.833776	1.09957	4.17801	-0.396995		94.8	1.54258	2.40776	-0.219779	1.33769	1.14406	0.862057
94.9	6.06235	2.41374	0.181786	2.48924	4.01143	-0.451562		94.9	1.76175	2.09938	-0.627312	1.49041	1.00999	0.291425
95	4.2215	3.41906	0.997059	3.94555	3.21731	-0.310702		95	1.99272	1.66506	-1.06579	1.54976	1.01129	-0.384849
95.1	2.00332	4.27006	1.36329	5.32013	1.94165	-0.0344634		95.1	2.1616	1.19438	-1.46029	1.57225	1.06954	-1.10395
95.2	-0.106575	4.75898	1.17759	6.3292	0.492701	0.237641		95.2	2.20217	0.766417	-1.7401	1.59999	1.09886	-1.79752
95.3	-1.66293	4.68576	0.469708	6.64149	-0.734894	0.276281		95.3	2.07329	0.435214	-1.86022	1.64662	1.02957	-2.41115
95.4	-2.38083	3.88766	-0.642214	6.03403	-1.40901	-0.176546		95.4	1.76786	0.22005	-1.81769	1.70098	0.824054	-2.91615
95.5	-2.21036	2.31129	-1.98884	4.53881	-1.39884	-1.27864		95.5	1.31323	0.101468	-1.65305	1.73953	0.480699	-3.31058
95.6	-1.35713	0.134198	-3.37536	2.47686	-0.84495	-2.97658		95.6	0.767341	0.0267051	-1.43793	1.73714	0.0315056	-3.61569
95.7	-0.192797	-2.21401	-4.58524	0.361726	-0.0869569	-4.98382		95.7	0.212656	-0.0733708	-1.25407	1.66961	-0.467837	-3.87004
95.8	0.863314	-4.18462	-5.35057	-1.29823	0.473487	-6.86934		95.8	-0.252179	-0.259395	-1.16852	1.51188	-0.949526	-4.11985
95.9	1.47331	-5.31447	-5.42326	-2.18862	0.542818	-8.20511		95.9	-0.529561	-0.564596	-1.21597	1.24141	-1.34481	-4.40889
96	1.46342	-5.3997	-4.66422	-2.29469	0.0526123	-8.7235		96	-0.54508	-0.986029	-1.38962	0.846133	-1.59358	-4.76809
96.1	0.874459	-4.53892	-3.1499	-1.86532	-0.869493	-8.41123		96.1	-0.270958	-1.48531	-1.64659	0.334721	-1.65572	-5.20618
96.2	-0.0847669	-3.09876	-1.21243	-1.22355	-2.00324	-7.50055		96.2	0.260111	-1.9954	-1.92325	-0.25702	-1.52041	-5.70459
96.3	-1.12652	-1.59549	0.652656	-0.625523	-3.10178	-6.34479		96.3	0.957459	-2.4315	-2.15223	-0.867979	-1.21169	-6.21775
96.4	-1.95043	-0.534675	1.93896	-0.209234	-3.92526	-5.31691		96.4	1.69369	-2.70624	-2.27626	-1.42472	-0.785226	-6.67984
96.5	-2.27418	-0.247413	2.29187	-0.0484303	-4.31082	-4.72085		96.5	2.34109	-2.75332	-2.25826	-1.86198	-0.313062	-7.01712
96.6	-1.83984	-0.748669	1.63613	-0.192317	-4.17729	-4.69831		96.6	2.80789	-2.55247	-2.09067	-2.14266	0.136235	-7.16434
96.7	-0.493997	-1.76936	0.190304	-0.652457	-3.50245	-5.22438		96.7	3.06105	-2.14312	-1.80058	-2.26836	0.516895	-7.08056
96.8	1.73951	-2.8943	-1.58865	-1.3995	-2.28744	-6.14093		96.8	3.12893	-1.61758	-1.44672	-2.27581	0.816524	-6.76097
96.9	4.55348	-3.72881	-3.19096	-2.3648	-0.563707	-7.20994		96.9	3.08516	-1.09651	-1.10871	-2.22035	1.05307	-6.2406
97	7.36524	-3.98578	-4.23357	-3.4181	1.56541	-8.19668		97	3.01906	-0.699434	-0.870481	-2.15514	1.26216	-5.58669
97.1	9.47409	-3.52601	-4.53483	-4.35227	3.83912	-8.90018		97.1	3.00432	-0.515383	-0.798971	-2.11978	1.48328	-4.88158
97.2	10.3056	-2.35936	-4.09734	-4.92571	5.85109	-9.13422		97.2	3.07983	-0.580318	-0.922818	-2.13684	1.74748	-4.20383
97.3	9.6487	-0.66615	-3.06943	-4.95665	7.18183	-8.71038		97.3	3.24721	-0.868257	-1.21867	-2.21289	2.06809	-3.6094
97.4	7.74265	1.20057	-1.73623	-4.40973	7.55109	-7.48645		97.4	3.47766	-1.30117	-1.61277	-2.34075	2.43808	-3.11663
97.5	5.16703	2.77425	-0.418932	-3.43515	6.94472	-5.44505		97.5	3.71758	-1.77742	-2.00237	-2.50283	2.83118	-2.70403
97.6	2.62731	3.61969	0.592301	-2.31535	5.63651	-2.77221		97.6	3.89457	-2.20345	-2.2896	-2.67112	3.20724	-2.32262
97.7	0.719398	3.45847	1.0819	-1.35182	4.07393	0.122927		97.7	3.92701	-2.51827	-2.41389	-2.80323	3.52134	-1.9163
97.8	-0.24924	2.21143	0.90006	-0.75673	2.68508	2.70521		97.8	3.74456	-2.70397	-2.36962	-2.8435	3.73104	-1.44191
97.9	-0.335411	0.0301264	0.00323844	-0.622406	1.75572	4.48632		97.9	3.3146	-2.78193	-2.2008	-2.73777	3.79998	-0.881143
98	0.157143	-2.69938	-1.45275	-0.915584	1.38969	5.17696		98	2.66163	-2.79828	-1.97875	-2.45767	3.70397	-0.244272
98.1	0.895061	-5.42964	-3.09059	-1.50218	1.52497	4.78842		98.1	1.86802	-2.808	-1.77653	-2.02057	3.43737	0.429837
98.2	1.64342	-7.60691	-4.40782	-2.22193	1.97916	3.6561		98.2	1.05297	-2.86134	-1.65028	-1.49168	3.0188	1.08095
98.3	2.2389	-8.84492	-4.98704	-2.94769	2.5053	2.31592		98.3	0.338369	-2.99473	-1.62861	-0.965776	2.49387	1.6392
98.4	2.51473	-9.01196	-4.69253	-3.51343	2.89057	1.25963		98.4	-0.186359	-3.22512	-1.71215	-0.536492	1.92878	2.03853
98.5	2.29099	-8.24612	-3.70166	-3.64544	3.05236	0.766459		98.5	-0.489323	-3.5433	-1.87678	-0.268994	1.39412	2.22775
98.6	1.45183	-6.88579	-2.43825	-3.04935	3.00119	0.854792		98.6	-0.601126	-3.90739	-2.076	-0.184075	0.946226	2.18182
98.7	0.0559364	-5.31105	-1.36368	-1.62072	2.73737	1.3363		98.7	-0.598254	-4.24499	-2.24282	-0.256278	0.615513	1.91357
98.8	-1.62627	-3.80401	-0.760027	0.409533	2.2069	1.92662		98.8	-0.570585	-4.47111	-2.29709	-0.422904	0.401552	1.47886
98.9	-3.18584	-2.52463	-0.659633	2.50498	1.31895	2.32565		98.9	-0.592838	-4.51564	-2.16382	-0.605413	0.276663	0.968584
99	-4.20716	-1.57281	-0.923188	4.03441	0.0661649	2.3585		99	-0.711701	-4.34779	-1.79941	-0.734514	0.19755	0.48328
99.1	-4.40555	-1.06708	-1.36778	4.53066	-1.37287	2.00383		99.1	-0.944418	-3.98783	-1.21364	-0.767184	0.118686	0.100758
99.2	-3.75334	-1.14247	-1.83912	3.86267	-2.6617	1.34358		99.2	-1.28233	-3.50227	-0.473847	-0.691294	0.00449812	-0.146011
99.3	-2.52308	-1.78935	-2.20642	2.23212	-3.45283	0.444572		99.3	-1.69517	-2.98569	0.313866	-0.525583	-0.164971	-0.26788
99.4	-1.18126	-2.731	-2.30485	0.0918149	-3.54021	-0.657858		99.4	-2.13599	-2.53314	1.03758	-0.317207	-0.396332	-0.304153
99.5	-0.200408	-3.52787	-1.93583	-1.98419	-2.93703	-1.85505		99.5	-2.54712	-2.21344	1.615	-0.136171	-0.68519	-0.303923
99.6	0.134951	-3.81382	-0.919276	-3.45506	-1.88162	-2.90386		99.6	-2.87151	-2.05712	2.01425	-0.063328	-1.0132	-0.309906
99.7	-0.221158	-3.45645	0.812808	-4.01824	-0.733418	-3.49768		99.7	-3.06541	-2.06048	2.25202	-0.170987	-1.34111	-0.349941
99.8	-1.12561	-2.5762	3.10428	-3.69688	0.180037	-3.46175		99.8	-3.1074	-2.19653	2.37696	-0.499455	-1.60809	-0.433917
99.9	-2.31277	-1.48765	5.55034	-2.77732	0.638476	-2.84677		99.9	-3.00497	-2.42621	2.44838	-1.039	-1.74522	-0.557275
100	-3.50555	-0.590295	7.58943	-1.65756	0.56411	-1.87915		100	-2.79797	-2.70288	2.52141	-1.72679	-1.70078	-0.70669
100.1	-4.50358	-0.230114	8.6986	-0.696349	0.00959513	-0.812135		100.1	-2.5515	-2.97268	2.63768	-2.46353	-1.46762	-0.860361
100.2	-5.20292	-0.552806	8.60152	-0.103041	-0.88078	0.149815		100.2	-2.33773	-3.17989	2.8181	-3.14257	-1.09659	-0.981006
100.3	-5.53748	-1.45092	7.37788	0.0282719	-1.90938	0.858697		100.3	-2.2129	-3.27841	3.05714	-3.68383	-0.686111	-1.01557
100.4	-5.45866	-2.65362	5.42355	-0.382389	-2.83882	1.23459		100.4	-2.20054	-3.2442	3.3223	-4.05687	-0.354187	-0.911433
100.5	-4.92261	-3.86103	3.28213	-1.42066	-3.36749	1.24602		100.5	-2.28715	-3.08328	3.55754	-4.28437	-0.200922	-0.642166
100.6	-3.89958	-4.83746	1.46424	-3.07899	-3.21974	0.89805		100.6	-2.42772	-2.83182	3.69053	-4.42472	-0.279119	-0.226871
100.7	-2.46591	-5.47742	0.291036	-5.13787	-2.26502	0.261427		100.7	-2.56164	-2.54832	3.64585	-4.54683	-0.584179	0.271339
100.8	-0.88646	-5.7705	-0.126313	-7.16183	-0.617493	-0.536237		100.8	-2.63415	-2.2964	3.36447	-4.70988	-1.06069	0.7652
100.9	0.436561	-5.72909	0.1374	-8.66176	1.30201	-1.26883		100.9	-2.61149	-2.12328	2.82529	-4.951	-1.62329	1.16895
101	1.11099	-5.31195	0.860846	-9.31157	2.85477	-1.60638		101	-2.48615	-2.0439	2.05812	-5.28104	-2.18231	1.41886
101.1	0.940858	-4.40584	1.75878	-9.1097	3.43789	-1.24541		101.1	-2.27537	-2.03976	1.14062	-5.6882	-2.66625	1.4865
101.2	0.00973768	-2.94615	2.57186	-8.32575	2.70568	-0.0847525		101.2	-2.01723	-2.07074	0.176804	-6.14524	-3.03608	1.3838
101.3	-1.33735	-1.07834	3.07987	-7.32271	0.723872	1.67368		101.3	-1.76208	-2.09095	-0.73326	-6.61226	-3.29098	1.15539
101.4	-2.61094	0.818377	3.07359	-6.40412	-2.06276	3.56232		101.4	-1.56619	-2.06044	-1.52142	-7.03507	-3.46691	0.864066
101.5	-3.40226	2.24336	2.34465	-5.77277	-5.00599	5.00784		101.5	-1.48813	-1.94944	-2.16736	-7.34807	-3.62711	0.573559
101.6	-3.54547	2.79497	0.7669	-5.54916	-7.46221	5.54887		101.6	-1.57901	-1.74009	-2.69602	-7.48799	-3.84793	0.331162
101.7	-3.12025	2.35282	-1.57652	-5.75666	-9.00016	4.98456		101.7	-1.86542	-1.43224	-3.16144	-7.41612	-4.19966	0.15706
101.8	-2.37274	1.11927	-4.34331	-6.30701	-9.49363	3.4363		101.8	-2.33301	-1.04863	-3.62387	-7.13637	-4.7243	0.0403144
101.9	-1.61972	-0.482416	-6.99607	-7.02475	-9.10775	1.29979		101.9	-2.92175	-0.636847	-4.13013	-6.69758	-5.41615	-0.0564729
102	-1.14906	-1.97748	-9.00696	-7.7413	-8.19649	-0.887155		102	-3.54069	-0.267662	-4.70337	-6.17637	-6.21607	-0.184864
102.1	-1.1211	-2.99725	-10.0475	-8.3218	-7.17218	-2.64842		102.1	-4.09493	-0.0229011	-5.34323	-5.65302	-7.02295	-0.394528
102.2	-1.59254	-3.34237	-10.1166	-8.60844	-6.35831	-3.70652		102.2	-4.5145	0.0257046	-6.02981	-5.19209	-7.72219	-0.716743
102.3	-2.57261	-2.95039	-9.51662	-8.39993	-5.9432	-4.04056		102.3	-4.77477	-0.158316	-6.72691	-4.83026	-8.22066	-1.15309
102.4	-4.01084	-1.91861	-8.69628	-7.5165	-6.01896	-3.85933		102.4	-4.8969	-0.55518	-7.38418	-4.57013	-8.473	-1.67055
102.5	-5.75543	-0.536922	-8.03835	-5.94009	-6.59677	-3.49596		102.5	-4.93413	-1.0881	-7.93889	-4.38237	-8.49017	-2.2038
102.6	-7.51245	0.792275	-7.72405	-3.90609	-7.61699	-3.25351		102.6	-4.95392	-1.64512	-8.32344	-4.21699	-8.32511	-2.66617
102.7	-8.89753	1.6883	-7.74551	-1.85208	-8.90669	-3.25177		102.7	-5.01728	-2.11465	-8.47876	-4.01952	-8.04763	-2.97231
102.8	-9.58122	1.8703	-7.98627	-0.24916	-10.1607	-3.42806		102.8	-5.16112	-2.41689	-8.37376	-3.74604	-7.72293	-3.06479
102.9	-9.41232	1.21478	-8.30587	0.571263	-11.0112	-3.64905		102.9	-5.39085	-2.52182	-8.01993	-3.37218	-7.39957	-2.93447
103	-8.47009	-0.252043	-8.59191	0.513103	-11.1634	-3.80397		103	-5.68596	-2.44983	-7.47211	-2.89439	-7.10536	-2.62249
103.1	-7.03539	-2.30997	-8.77712	-0.253046	-10.5366	-3.85552		103.1	-6.00834	-2.25956	-6.81251	-2.33126	-6.85088	-2.20491
103.2	-5.47856	-4.50333	-8.82895	-1.35058	-9.29592	-3.7891		103.2	-6.30584	-2.03199	-6.12613	-1.72601	-6.63424	-1.76646
103.3	-4.17836	-6.26471	-8.66312	-2.35718	-7.75397	-3.51632		103.3	-6.51533	-1.84998	-5.48049	-1.14553	-6.44329	-1.37406
103.4	-3.45666	-7.11654	-8.11382	-2.94517	-6.19413	-2.87566		103.4	-6.57334	-1.77501	-4.91505	-0.669041	-6.25548	-1.06256
103.5	-3.4498	-6.86274	-6.98379	-2.95001	-4.77656	-1.76812		103.5	-6.43546	-1.83186	-4.44097	-0.366455	-6.03884	-0.834686
103.6	-4.06506	-5.6204	-5.21118	-2.37564	-3.58781	-0.272454		103.6	-6.09364	-2.00583	-4.04676	-0.27355	-5.75915	-0.671939
103.7	-5.05447	-3.76138	-2.99175	-1.38571	-2.69931	1.32836		103.7	-5.58372	-2.24969	-3.70544	-0.37769	-5.39283	-0.547786
103.8	-6.13798	-1.77338	-0.73464	-0.199433	-2.17063	2.65517		103.8	-4.98011	-2.49543	-3.38112	-0.621224	-4.94133	-0.435475
103.9	-7.07292	-0.107766	1.09662	0.964894	-2.03228	3.39231		103.9	-4.37588	-2.66658	-3.03483	-0.920596	-4.44064	-0.310187
104	-7.63012	0.918351	2.15174	1.88921	-2.26021	3.41322		104	-3.85656	-2.69259	-2.63204	-1.19373	-3.95605	-0.146108
104.1	-7.57225	1.17549	2.27964	2.35179	-2.77287	2.81148		104.1	-3.47895	-2.52658	-2.15038	-1.38353	-3.56005	0.0839837
104.2	-6.74153	0.737605	1.57408	2.16013	-3.40392	1.79938		104.2	-3.25769	-2.16145	-1.58618	-1.46825	-3.30611	0.400843
104.3	-5.16849	-0.17421	0.335353	1.23789	-3.9341	0.620424		104.3	-3.16205	-1.63593	-0.960865	-1.45832	-3.21444	0.807951
104.4	-3.08673	-1.26913	-1.04391	-0.272706	-4.15198	-0.485071		104.4	-3.12894	-1.02423	-0.324714	-1.38594	-3.27269	1.28498
104.5	-0.912464	-2.2754	-2.1839	-2.01954	-3.93329	-1.31746		104.5	-3.0856	-0.414923	0.251257	-1.2945	-3.4453	1.78967
104.6	0.849058	-2.96282	-2.79246	-3.56882	-3.33566	-1.73976		104.6	-2.97174	0.112387	0.695398	-1.22776	-3.68655	2.2723
104.7	1.80174	-3.16155	-2.70495	-4.57622	-2.65163	-1.67408		104.7	-2.75233	0.50437	0.957326	-1.22015	-3.95158	2.69547
104.8	1.79303	-2.75216	-1.92969	-4.89627	-2.2985	-1.06616		104.8	-2.42124	0.744852	1.02491	-1.28986	-4.20505	3.04731
104.9	0.940932	-1.68115	-0.640642	-4.57731	-2.56392	0.122449		104.9	-2.00097	0.857776	0.929739	-1.43394	-4.42401	3.34209
105	-0.416986	-0.0574148	0.928146	-3.79733	-3.43705	1.87029		105	-1.53917	0.898524	0.73931	-1.62727	-4.59414	3.6095
105.1	-1.83072	1.8172	2.51662	-2.77642	-4.63571	4.04517		105.1	-1.10111	0.937558	0.535552	-1.82527	-4.70824	3.88279
105.2	-2.88695	3.53615	3.83078	-1.71952	-5.76681	6.3413		105.2	-0.758039	1.04335	0.389473	-1.9699	-4.77026	4.18894
105.3	-3.32838	4.73788	4.58032	-0.821243	-6.52223	8.30737		105.3	-0.575805	1.26606	0.341598	-1.99979	-4.80327	4.5406
105.4	-3.1189	5.20288	4.55865	-0.251019	-6.8006	9.53313		105.4	-0.598615	1.62592	0.394677	-1.86483	-4.85224	4.93237
105.5	-2.40798	4.89033	3.71814	-0.0701525	-6.67604	9.84892		105.5	-0.830854	2.10873	0.519709	-1.54289	-4.97418	5.33938
105.6	-1.4443	3.98043	2.24558	-0.220188	-6.34123	9.37371		105.6	-1.22788	2.66812	0.670038	-1.05107	-5.21525	5.71957
105.7	-0.485553	2.83806	0.533803	-0.560094	-5.98255	8.42439		105.7	-1.70239	3.23259	0.796791	-0.445717	-5.58901	6.01771
105.8	0.278313	1.86821	-0.957641	-0.934864	-5.66515	7.35756		105.8	-2.14761	3.71855	0.861153	0.190676	-6.07091	6.17023
105.9	0.705521	1.40118	-1.88981	-1.20584	-5.34353	6.44531		105.9	-2.46735	4.05281	0.838682	0.772334	-6.60861	6.11211
106	0.663704	1.62421	-2.14799	-1.22086	-4.98859	5.8249		106	-2.6028	4.19597	0.721786	1.23315	-7.14003	5.78773
106.1	0.0112524	2.51702	-1.85778	-0.780759	-4.71313	5.49319		106.1	-2.54658	4.15495	0.522585	1.54052	-7.61375	5.16886
106.2	-1.30024	3.84225	-1.28156	0.27477	-4.76579	5.34266		106.2	-2.33972	3.97825	0.272631	1.69691	-8.0009	4.27236
106.3	-3.09901	5.24485	-0.666907	1.90412	-5.40858	5.17929		106.3	-2.05278	3.73858	0.0220187	1.733	-8.29628	3.16517
106.4	-4.94772	6.34818	-0.14936	3.78486	-6.74988	4.78918		106.4	-1.76313	3.50926	-0.166013	1.69465	-8.51269	1.95038
106.5	-6.27364	6.84381	0.22512	5.39465	-8.65238	4.00224		106.5	-1.53574	3.3391	-0.229612	1.63088	-8.67157	0.740558
106.6	-6.6278	6.58009	0.4535	6.24139	-10.7561	2.71522		106.6	-1.4114	3.2364	-0.129985	1.58684	-8.79701	-0.369727
106.7	-5.85255	5.62511	0.546154	6.09086	-12.578	0.882291		106.7	-1.40363	3.1712	0.130009	1.59868	-8.91616	-1.32113
106.8	-4.13334	4.25093	0.529385	5.0575	-13.6699	-1.46927		106.8	-1.49927	3.09005	0.504084	1.68646	-9.05775	-2.09439
106.9	-1.9313	2.83867	0.444357	3.50566	-13.8201	-4.17947		106.9	-1.65947	2.93481	0.917045	1.84616	-9.24162	-2.70487
107	0.18836	1.73402	0.3311	1.83753	-13.1038	-6.93319		107	-1.81903	2.66158	1.29212	2.04514	-9.46437	-3.1895
107.1	1.75903	1.1286	0.298243	0.362497	-11.8221	-9.28902		107.1	-1.8945	2.25529	1.57582	2.2257	-9.69156	-3.5921
107.2	2.51602	0.991892	0.521602	-0.72209	-10.3549	-10.8025		107.2	-1.80426	1.73193	1.74943	2.32038	-9.8623	-3.94875
107.3	2.42134	1.08755	1.16439	-1.30435	-9.04225	-11.1933		107.3	-1.49684	1.13137	1.82608	2.27183	-9.90472	-4.27709
107.4	1.62819	1.09222	2.22746	-1.30873	-8.11495	-10.4505		107.4	-0.974619	0.507348	1.83925	2.05101	-9.75641	-4.57107
107.5	0.410526	0.7599	3.46226	-0.733558	-7.69076	-8.81622		107.5	-0.300371	-0.0818159	1.82878	1.67089	-9.38197	-4.80172
107.6	-0.920434	0.0216134	4.46947	0.286274	-7.75051	-6.70012		107.6	0.418758	-0.581949	1.83117	1.18799	-8.78611	-4.92354
107.7	-2.05975	-1.01501	4.87235	1.4941	-8.11438	-4.55334		107.7	1.0657	-0.949577	1.87363	0.686118	-8.01837	-4.88577
107.8	-2.70112	-2.12786	4.51852	2.60189	-8.49996	-2.74544		107.8	1.55027	-1.15786	1.9706	0.248811	-7.16146	-4.64681
107.9	-2.58335	-3.06471	3.54135	3.34429	-8.62796	-1.50153		107.9	1.83113	-1.20235	2.12289	-0.0641354	-6.30863	-4.18708
108	-1.56483	-3.65219	2.28436	3.51374	-8.31126	-0.883808		108	1.91785	-1.10421	2.31598	-0.229172	-5.53817	-3.5166
108.1	0.278329	-3.86141	1.15381	2.95943	-7.47089	-0.792535		108.1	1.85825	-0.905612	2.51852	-0.259984	-4.89681	-2.67543
108.2	2.60413	-3.7645	0.448865	1.6408	-6.13113	-0.995473		108.2	1.71719	-0.656829	2.68325	-0.199324	-4.39545	-1.728
108.3	4.83443	-3.43569	0.27563	-0.22073	-4.3907	-1.20584		108.3	1.55442	-0.401847	2.75725	-0.104737	-4.01383	-0.752608
108.4	6.37264	-2.87715	0.586747	-2.1184	-2.44845	-1.18874		108.4	1.41128	-0.168141	2.69904	-0.032155	-3.70707	0.172009
108.5	6.86462	-1.99874	1.25125	-3.47433	-0.618273	-0.827095		108.5	1.30929	0.0369298	2.49633	-0.0228683	-3.41531	0.97908
108.6	6.3064	-0.702075	2.09285	-3.92856	0.747344	-0.117196		108.6	1.25293	0.224027	2.17814	-0.0954012	-3.07926	1.6254
108.7	4.96311	0.977691	2.92006	-3.48256	1.39442	0.882251		108.7	1.2303	0.414991	1.81086	-0.246093	-2.65608	2.09878
108.8	3.23313	2.79694	3.58074	-2.44312	1.27567	2.10921		108.8	1.21326	0.633602	1.48023	-0.454545	-2.12982	2.41811
108.9	1.50291	4.36803	3.96477	-1.24589	0.548196	3.49737		108.9	1.15878	0.897948	1.26615	-0.68697	-1.51429	2.62542
109	0.0232684	5.31686	3.96475	-0.273139	-0.519013	4.91304		109	1.01568	1.21786	1.21916	-0.894912	-0.848005	2.7693
109.1	-1.13894	5.42691	3.48551	0.299259	-1.62753	6.13114		109.1	0.738115	1.59391	1.34666	-1.01722	-0.185532	2.88721
109.2	-2.02281	4.7329	2.47264	0.500328	-2.47573	6.90226		109.2	0.305231	2.01623	1.61349	-0.996635	0.413682	2.99639
109.3	-2.65425	3.50782	1.02345	0.444148	-2.79058	7.02009		109.3	-0.265231	2.46273	1.95484	-0.805248	0.898811	3.09748
109.4	-3.01788	2.16564	-0.536981	0.261037	-2.40164	6.43409		109.4	-0.920134	2.8961	2.29812	-0.460781	1.24116	3.18366
109.5	-3.08586	1.11853	-1.72525	0.040134	-1.30581	5.30206		109.5	-1.58778	3.26419	2.58454	-0.0227534	1.44279	3.24733
109.6	-2.87288	0.65169	-2.07937	-0.199394	0.318407	3.92709		109.6	-2.19688	3.5089	2.78246	0.429634	1.53444	3.27857
109.7	-2.49108	0.841693	-1.35499	-0.437487	2.15273	2.6405		109.7	-2.69175	3.58514	2.88642	0.827133	1.56475	3.25668
109.8	-2.15433	1.57713	0.355086	-0.575596	3.85599	1.65341		109.8	-3.04151	3.48348	2.90968	1.13369	1.5854	3.14517
109.9	-2.11451	2.62825	2.61636	-0.438498	5.13091	1.0089		109.9	-3.24216	3.24389	2.8803	1.35331	1.63822	2.9001
110	-2.52459	3.74384	4.81178	0.129282	5.79594	0.650321		110	-3.31245	2.94865	2.84187	1.51836	1.74426	2.49122
110.1	-3.32522	4.71334	6.38963	1.13518	5.79876	0.529744		110.1	-3.28834	2.69526	2.85448	1.66874	1.89679	1.92235
110.2	-4.26873	5.36845	7.08693	2.38161	5.20159	0.637943		110.2	-3.21723	2.56162	2.98505	1.83656	2.06238	1.23806
110.3	-5.04357	5.55547	6.96205	3.51791	4.17518	0.965265		110.3	-3.14877	2.58083	3.28618	2.03853	2.19164	0.511428
110.4	-5.39169	5.13776	6.28464	4.20802	2.95244	1.41319		110.4	-3.12356	2.73515	3.77125	2.27622	2.23659	-0.180158
110.5	-5.17964	4.09301	5.34814	4.31436	1.79084	1.73712		110.5	-3.16319	2.96902	4.39819	2.54231	2.16655	-0.777618
110.6	-4.44289	2.63986	4.36023	3.96556	0.899335	1.60165		110.6	-3.2632	3.21381	5.07436	2.82507	1.97679	-1.25409
110.7	-3.38787	1.24378	3.46527	3.46043	0.378872	0.74684		110.7	-3.38855	3.41137	5.68396	3.11035	1.68612	-1.61436
110.8	-2.33378	0.40796	2.83219	3.10503	0.175169	-0.819748		110.8	-3.47705	3.52788	6.12796	3.38032	1.32901	-1.88483
110.9	-1.61295	0.425259	2.68692	3.05692	0.117315	-2.76847		110.9	-3.45496	3.55504	6.35691	3.61073	0.945874	-2.10144
111	-1.44546	1.23595	3.24313	3.29707	0.0243615	-4.61285		111	-3.26047	3.50263	6.3819	3.77201	0.577666	-2.30217
111.1	-1.8541	2.49206	4.58222	3.6945	-0.204167	-5.9187		111.1	-2.86586	3.38979	6.26247	3.83725	0.264534	-2.52247
111.2	-2.6573	3.74209	6.52108	4.08094	-0.541718	-6.4549		111.2	-2.28887	3.24066	6.08119	3.79431	0.0432566	-2.79268
111.3	-3.54656	4.62748	8.57851	4.32404	-0.872123	-6.22972		111.3	-1.59081	3.08828	5.91623	3.65686	-0.057021	-3.13479
111.4	-4.1912	5.00312	10.1399	4.3695	-1.07325	-5.45951		111.4	-0.86028	2.97624	5.82498	3.46283	-0.0240222	-3.55328
111.5	-4.28536	4.93553	10.7184	4.2741	-1.08537	-4.47125		111.5	-0.188131	2.95086	5.83972	3.2593	0.129883	-4.02299
111.6	-3.61885	4.60904	10.1644	4.15095	-0.940006	-3.58912		111.6	0.358484	3.04333	5.96727	3.08385	0.366126	-4.48491
111.7	-2.14919	4.20545	8.70383	4.04624	-0.71736	-3.03201		111.7	0.754173	3.25466	6.18846	2.9517	0.630742	-4.85941
111.8	-0.0188053	3.82242	6.81457	3.87701	-0.460781	-2.88265		111.8	1.01944	3.55094	6.45729	2.85582	0.872372	-5.07449
111.9	2.43956	3.45011	5.0566	3.49076	-0.121664	-3.10712		111.9	1.20795	3.87399	6.70362	2.77541	1.05619	-5.09486
112	4.76537	3.02029	3.8802	2.78793	0.413477	-3.62837		112	1.38366	4.15878	6.84311	2.68834	1.16859	-4.93975
112.1	6.47531	2.54727	3.48032	1.87128	1.24772	-4.4027		112.1	1.59909	4.35239	6.79775	2.58224	1.21177	-4.67977
112.2	7.23931	2.18849	3.79698	1.0159	2.35182	-5.3771		112.2	1.88258	4.42852	6.52257	2.45847	1.19611	-4.41252
112.3	6.98365	2.20826	4.61079	0.505472	3.51573	-6.38347		112.3	2.23727	4.39048	6.02579	2.32848	1.13784	-4.2285
112.4	5.90458	2.8159	5.6335	0.477762	4.395	-7.10573		112.4	2.64301	4.2654	5.37125	2.20428	1.05947	-4.18349
112.5	4.39294	4.00059	6.59249	0.858616	4.67363	-7.1863		112.5	3.05761	4.09091	4.65966	2.09138	0.990076	-4.2876
112.6	2.89656	5.46186	7.25712	1.42688	4.22503	-6.42481		112.6	3.42404	3.90104	3.99651	1.99279	0.961463	-4.51119
112.7	1.7592	6.7279	7.43059	1.93007	3.14921	-4.9591		112.7	3.68254	3.71827	3.46047	1.91952	0.997607	-4.7992
112.8	1.13297	7.33342	6.9536	2.21436	1.70663	-3.28192		112.8	3.78604	3.55725	3.08148	1.897	1.09989	-5.08716
112.9	1.005	7.03349	5.75008	2.27731	0.192334	-2.03513		112.9	3.71265	3.43352	2.83706	1.96185	1.23761	-5.3142
113	1.27286	5.9218	3.9003	2.2198	-1.13835	-1.68646		113	3.47257	3.36601	2.66768	2.14435	1.34814	-5.43092
113.1	1.8385	4.35637	1.69465	2.15972	-2.06372	-2.33131		113.1	3.106	3.3693	2.5003	2.44698	1.35338	-5.4092
113.2	2.61224	2.80916	-0.408729	2.16275	-2.41772	-3.70595		113.2	2.67578	3.43757	2.26902	2.83474	1.18888	-5.25398
113.3	3.42925	1.64278	-1.93274	2.23162	-2.11969	-5.35902		113.3	2.25616	3.53297	1.92843	3.24427	0.831819	-5.00879
113.4	4.08022	0.977637	-2.56962	2.37028	-1.20378	-6.83301		113.4	1.91821	3.58806	1.45776	3.60526	0.312628	-4.74993
113.5	4.37565	0.71531	-2.29809	2.63129	0.153666	-7.77884		113.5	1.71345	3.52498	0.859915	3.86267	-0.296138	-4.56581
113.6	4.19903	0.712666	-1.38627	3.10798	1.61713	-8.00254		113.6	1.6616	3.28315	0.160557	3.99293	-0.903354	-4.5275
113.7	3.51786	0.916955	-0.27494	3.89035	2.75481	-7.48797		113.7	1.74779	2.84627	-0.59076	4.00715	-1.42514	-4.6591
113.8	2.39379	1.3996	0.600824	4.97387	3.12671	-6.38699		113.8	1.92991	2.25371	-1.32203	3.94284	-1.80356	-4.92212
113.9	1.00776	2.24434	0.951515	6.16057	2.44087	-5.00787		113.9	2.15299	1.58932	-1.94887	3.85136	-2.01705	-5.22755
114	-0.330185	3.36887	0.679027	7.09735	0.719135	-3.74469		114	2.36348	0.953874	-2.39556	3.78491	-2.0837	-5.46964
114.1	-1.22891	4.43773	-0.156473	7.43974	-1.67497	-2.93756		114.1	2.51854	0.431862	-2.61945	3.78606	-2.05641	-5.56255
114.2	-1.35214	4.93721	-1.409	6.99541	-4.15262	-2.78563		114.2	2.59292	0.0690372	-2.62744	3.87812	-2.00998	-5.46357
114.3	-0.584375	4.3895	-2.90617	5.80294	-6.12399	-3.29482		114.3	2.57964	-0.132155	-2.47461	4.0583	-2.02157	-5.18101
114.4	0.877659	2.61674	-4.4585	4.14446	-7.17346	-4.30782		114.4	2.48653	-0.201865	-2.24414	4.29823	-2.14856	-4.76699
114.5	2.59825	-0.0934987	-5.81879	2.45615	-7.16371	-5.51914		114.5	2.33209	-0.188959	-2.01748	4.55039	-2.41024	-4.29992
114.6	4.10108	-3.04018	-6.68154	1.18403	-6.24084	-6.50632		114.6	2.14502	-0.151437	-1.8476	4.75656	-2.78167	-3.86227
114.7	5.06508	-5.37281	-6.75591	0.664596	-4.7676	-6.87882		114.7	1.96541	-0.149609	-1.74525	4.85838	-3.19678	-3.52155
114.8	5.41685	-6.44614	-5.89918	1.03006	-3.19679	-6.44681		114.8	1.83889	-0.235541	-1.68017	4.81408	-3.56088	-3.31699
114.9	5.2483	-6.06506	-4.21481	2.18238	-1.95381	-5.2854		114.9	1.80085	-0.437034	-1.59733	4.61429	-3.77591	-3.25306
115	4.69371	-4.52524	-2.06848	3.79662	-1.33045	-3.6764		115	1.85534	-0.743668	-1.43951	4.28918	-3.76884	-3.30476
115.1	3.85451	-2.44262	0.0284525	5.43331	-1.40072	-2.02956		115.1	1.96447	-1.09978	-1.16601	3.90455	-3.51608	-3.42848
115.2	2.79281	-0.469772	1.6199	6.71013	-2.00522	-0.740409		115.2	2.05807	-1.41076	-0.759529	3.54445	-3.05184	-3.57318
115.3	1.57345	0.932072	2.46685	7.39474	-2.83142	-0.0623494		115.3	2.06131	-1.56598	-0.2243	3.28349	-2.45741	-3.68766
115.4	0.3377	1.55483	2.61312	7.39513	-3.55944	-0.0479422		115.4	1.92486	-1.47451	0.416509	3.16318	-1.8365	-3.72985
115.5	-0.659527	1.43068	2.34082	6.70491	-3.93017	-0.594845		115.5	1.64407	-1.10085	1.12142	3.18125	-1.28664	-3.68034
115.6	-1.14311	0.783489	2.05774	5.40735	-3.74884	-1.53025		115.6	1.25889	-0.485088	1.83291	3.2974	-0.87504	-3.55271
115.7	-0.97683	-0.0565173	2.0873	3.70104	-2.93648	-2.65802		115.7	0.835807	0.266327	2.48318	3.45001	-0.625791	-3.3931
115.8	-0.302689	-0.775044	2.52663	1.91275	-1.55463	-3.8164		115.8	0.44456	1.01795	3.00609	3.57578	-0.51935	-3.26675
115.9	0.50315	-1.11677	3.24043	0.45673	0.144253	-4.88885		115.9	0.139606	1.65019	3.3522	3.62859	-0.504377	-3.23979
116	1.00688	-0.897116	4.004	-0.318762	1.76809	-5.75477		116	-0.0482088	2.09288	3.50174	3.59013	-0.517607	-3.35924
116.1	0.932583	-0.0219492	4.64037	-0.291777	2.93189	-6.25401		116.1	-0.111358	2.33714	3.46924	3.46654	-0.504411	-3.64015
116.2	0.278657	1.46156	5.07498	0.410826	3.39167	-6.23627		116.2	-0.0612876	2.42472	3.29825	3.27492	-0.433529	-4.06386
116.3	-0.672264	3.31205	5.30193	1.49114	3.10675	-5.66461		116.3	0.0743143	2.42855	3.04666	3.03528	-0.301135	-4.5869
116.4	-1.48305	5.09506	5.33939	2.63928	2.22965	-4.70926		116.4	0.252095	2.43014	2.76705	2.77239	-0.12765	-5.15457
116.5	-1.77555	6.32791	5.15543	3.6243	1.04044	-3.73344		116.5	0.415261	2.4968	2.48933	2.52287	0.0477607	-5.71401
116.6	-1.4029	6.71255	4.67465	4.32056	-0.144303	-3.13741		116.6	0.500623	2.66316	2.21719	2.33576	0.173954	-6.22528
116.7	-0.490516	6.22289	3.81541	4.6943	-1.07591	-3.21803		116.7	0.456779	2.92688	1.93605	2.26247	0.195129	-6.66652
116.8	0.661659	5.083	2.57063	4.77954	-1.62564	-4.06028		116.8	0.264483	3.2566	1.62621	2.33659	0.0635911	-7.03336
116.9	1.71927	3.68266	1.06734	4.60915	-1.78088	-5.51586		116.9	-0.0517881	3.60402	1.26837	2.55661	-0.246677	-7.33466
117	2.42465	2.42097	-0.439884	4.13715	-1.62643	-7.26532		117	-0.430511	3.91374	0.844987	2.88393	-0.730393	-7.58911
117.1	2.64293	1.62	-1.66388	3.32119	-1.30875	-8.93974		117.1	-0.795401	4.13134	0.342979	3.25262	-1.3481	-7.82424
117.2	2.36275	1.45759	-2.41252	2.23591	-0.980918	-10.2451		117.2	-1.08378	4.21264	-0.241128	3.58745	-2.03328	-8.07554
117.3	1.63071	1.91667	-2.66358	1.16542	-0.766869	-11.0409		117.3	-1.26786	4.13592	-0.897795	3.82079	-2.70999	-8.38006
117.4	0.474318	2.77164	-2.53912	0.520152	-0.791187	-11.3495		117.4	-1.35796	3.91357	-1.60241	3.90656	-3.31348	-8.76257
117.5	-1.04803	3.70829	-2.25273	0.666856	-1.19465	-11.3176		117.5	-1.39009	3.59307	-2.31548	3.83063	-3.80618	-9.22386
117.6	-2.76588	4.48848	-2.02679	1.71672	-2.0919	-11.1251		117.6	-1.40658	3.2452	-2.98459	3.61394	-4.18283	-9.73638
117.7	-4.36973	5.00899	-2.07936	3.42164	-3.50648	-10.8769		117.7	-1.44094	2.94029	-3.55065	3.30537	-4.46444	-10.2513
117.8	-5.5057	5.24319	-2.55711	5.27271	-5.29128	-10.5797		117.8	-1.51169	2.72335	-3.95992	2.96756	-4.68884	-10.7145
117.9	-5.92448	5.16083	-3.45916	6.67849	-7.10943	-10.2335		117.9	-1.62449	2.60307	-4.18145	2.66454	-4.8991	-11.0828
118	-5.57474	4.6942	-4.62788	7.18323	-8.5412	-9.93658		118	-1.7757	2.55528	-4.22308	2.44836	-5.13195	-11.3346
118.1	-4.6123	3.79076	-5.82395	6.60604	-9.27444	-9.88617		118.1	-1.95735	2.53725	-4.13372	2.34531	-5.41037	-11.4689
118.2	-3.3074	2.54799	-6.82301	5.08248	-9.21881	-10.2361		118.2	-2.15943	2.50605	-3.98926	2.34562	-5.74136	-11.4982
118.3	-1.94909	1.26404	-7.4475	3.02967	-8.52035	-10.9794		118.3	-2.36608	2.43463	-3.8694	2.40394	-6.11306	-11.4393
118.4	-0.770784	0.309105	-7.55953	1.01067	-7.47887	-11.9307		118.4	-2.55264	2.31574	-3.832	2.45051	-6.49227	-11.3097
118.5	0.0776049	-0.100528	-7.05232	-0.466137	-6.41301	-12.8146		118.5	-2.68785	2.15469	-3.89698	2.40951	-6.82699	-11.1286
118.6	0.516461	-0.00531473	-5.89028	-1.13372	-5.59569	-13.3889		118.6	-2.74404	1.95924	-4.04441	2.2184	-7.05226	-10.9236
118.7	0.507043	0.376221	-4.20587	-1.0141	-5.20091	-13.5279		118.7	-2.71006	1.73593	-4.22696	1.84164	-7.1019	-10.7307
118.8	0.072331	0.807542	-2.37172	-0.353913	-5.26706	-13.2194		118.8	-2.59992	1.49446	-4.39251	1.28099	-6.92792	-10.5839
118.9	-0.725309	1.15117	-0.893347	0.484017	-5.71412	-12.5287		118.9	-2.45154	1.25832	-4.50489	0.578175	-6.52309	-10.4977
119	-1.8046	1.38621	-0.207826	1.17069	-6.39366	-11.538		119	-2.31568	1.07068	-4.55199	-0.191929	-5.93038	-10.454
119.1	-3.0387	1.55748	-0.501337	1.51158	-7.11012	-10.3498		119.1	-2.24197	0.9821	-4.54366	-0.940614	-5.23455	-10.4047
119.2	-4.21954	1.68724	-1.617	1.45855	-7.64125	-9.11356		119.2	-2.26605	1.02291	-4.50442	-1.59391	-4.53864	-10.2888
119.3	-5.06446	1.75055	-3.13153	1.01971	-7.78221	-8.04607		119.3	-2.40157	1.1795	-4.46655	-2.11536	-3.93349	-10.0545
119.4	-5.32498	1.68647	-4.58564	0.172762	-7.33601	-7.39165		119.4	-2.63801	1.39559	-4.46908	-2.51298	-3.47365	-9.67811
119.5	-4.92816	1.44685	-5.66042	-1.13207	-6.13508	-7.30101		119.5	-2.94491	1.59619	-4.55601	-2.8299	-3.16442	-9.1695
119.6	-4.05202	1.05581	-6.27357	-2.85264	-4.1519	-7.73831		119.6	-3.27995	1.71652	-4.765	-3.12522	-2.96495	-8.56666
119.7	-3.05232	0.679917	-6.53834	-4.76461	-1.65904	-8.47093		119.7	-3.60058	1.72044	-5.10881	-3.45287	-2.80591	-7.92396
119.8	-2.30257	0.600797	-6.62465	-6.48573	0.80173	-9.14287		119.8	-3.87303	1.60267	-5.56024	-3.84377	-2.61419	-7.2973
119.9	-2.05445	1.04214	-6.68127	-7.64517	2.61019	-9.39866		119.9	-4.07664	1.38116	-6.05218	-4.2988	-2.33534	-6.73388
120	-2.35848	1.95788	-6.78046	-8.0764	3.31012	-9.00847		120	-4.20605	1.08662	-6.49561	-4.79355	-1.94727	-6.26439
120.1	-3.07451	2.97111	-6.91571	-7.85394	2.80863	-7.94862		120.1	-4.27375	0.754776	-6.80838	-5.29043	-1.46245	-5.89713
120.2	-3.94187	3.57294	-7.09539	-7.2256	1.40433	-6.41519		120.2	-4.31286	0.421991	-6.94155	-5.74588	-0.918732	-5.6139
120.3	-4.70088	3.40485	-7.36803	-6.52147	-0.338789	-4.74247		120.3	-4.37404	0.123068	-6.88959	-6.10925	-0.368252	-5.37165
120.4	-5.18868	2.42191	-7.75867	-6.0345	-1.80996	-3.2795		120.4	-4.51274	-0.112836	-6.68422	-6.32248	0.129769	-5.11433
120.5	-5.37839	0.874174	-8.21658	-5.92393	-2.56339	-2.29361		120.5	-4.77023	-0.267491	-6.37568	-6.331	0.514616	-4.78952
120.6	-5.35691	-0.850946	-8.56773	-6.1613	-2.45485	-1.87543		120.6	-5.15765	-0.339936	-6.01188	-6.10393	0.735509	-4.36513
120.7	-5.26592	-2.37943	-8.57067	-6.56484	-1.65327	-1.95978		120.7	-5.64724	-0.353641	-5.62533	-5.65306	0.765571	-3.83904
120.8	-5.23875	-3.44966	-8.03966	-6.89907	-0.512775	-2.36858		120.8	-6.17714	-0.358321	-5.23146	-5.03575	0.613983	-3.23868
120.9	-5.37045	-3.95418	-6.93407	-6.98844	0.600602	-2.87013		120.9	-6.66993	-0.415587	-4.83629	-4.33816	0.328469	-2.61359
121	-5.72936	-3.90678	-5.39547	-6.72306	1.46101	-3.23104		121	-7.05741	-0.573522	-4.44451	-3.65075	-0.0173136	-2.02632
121.1	-6.36492	-3.39522	-3.70239	-6.00444	2.02214	-3.27338		121.1	-7.30196	-0.843711	-4.06035	-3.04401	-0.347139	-1.54034
121.2	-7.28603	-2.56352	-2.16901	-4.75702	2.3313	-2.92659		121.2	-7.4044	-1.19081	-3.68264	-2.55054	-0.606318	-1.20741
121.3	-8.42944	-1.57334	-1.02848	-2.99754	2.39049	-2.21667		121.3	-7.39751	-1.5427	-3.30153	-2.16054	-0.775568	-1.0555
121.4	-9.63844	-0.551638	-0.353684	-0.904264	2.09614	-1.25626		121.4	-7.32926	-1.8171	-2.899	-1.83106	-0.869736	-1.08009
121.5	-10.6256	0.367809	-0.0533616	1.17902	1.31279	-0.199317		121.5	-7.24481	-1.94999	-2.45736	-1.50615	-0.925265	-1.24489
121.6	-11.0628	0.962571	0.014546	2.84914	0.0331956	0.807462		121.6	-7.17501	-1.91671	-1.97023	-1.13829	-0.984272	-1.49152
121.7	-10.736	0.984356	-0.0625356	3.78251	-1.54363	1.618		121.7	-7.13371	-1.73895	-1.45368	-0.702647	-1.08304	-1.75708
121.8	-9.6616	0.286222	-0.255535	3.83211	-3.06967	2.03499		121.8	-7.11954	-1.47492	-0.949137	-0.200622	-1.24642	-1.99516
121.9	-8.0993	-1.02028	-0.564627	3.08889	-4.20269	1.84657		121.9	-7.11868	-1.19873	-0.51307	0.343485	-1.48768	-2.19346
122	-6.44225	-2.49582	-0.94692	1.86756	-4.74484	0.917241		122	-7.10864	-0.977516	-0.196557	0.888648	-1.80918	-2.37823
122.1	-5.07153	-3.56018	-1.2798	0.595544	-4.68721	-0.697011		122.1	-7.06097	-0.853584	-0.02507	1.38414	-2.20188	-2.60263
122.2	-4.21812	-3.79059	-1.37367	-0.322819	-4.16425	-2.71153		122.2	-6.94191	-0.838542	0.0099913	1.77656	-2.64217	-2.9264
122.3	-3.92132	-3.11011	-1.0598	-0.637903	-3.39883	-4.67714		122.3	-6.71743	-0.92005	-0.0549366	2.01818	-3.0882	-3.3938
122.4	-4.07937	-1.81367	-0.289526	-0.311187	-2.65639	-6.15243		122.4	-6.36678	-1.07061	-0.170387	2.08146	-3.48087	-4.01852
122.5	-4.53661	-0.427861	0.741785	0.506907	-2.1919	-6.88307		122.5	-5.89731	-1.2501	-0.28758	1.97285	-3.75495	-4.78028
122.6	-5.12959	0.534488	1.64314	1.54598	-2.17683	-6.91751		122.6	-5.35219	-1.40741	-0.366686	1.73648	-3.85938	-5.62925
122.7	-5.71475	0.788377	2.01767	2.52677	-2.6403	-6.60213		122.7	-4.80222	-1.48462	-0.380108	1.4441	-3.77688	-6.49302
122.8	-6.19423	0.365408	1.67834	3.26332	-3.44336	-6.41449		122.8	-4.32292	-1.42803	-0.312549	1.17456	-3.53192	-7.28684
122.9	-6.47559	-0.45667	0.746272	3.66627	-4.34475	-6.7415		122.9	-3.96925	-1.20515	-0.163017	0.990671	-3.18469	-7.92567
123	-6.40551	-1.31763	-0.432443	3.67365	-5.09443	-7.72069		123	-3.75795	-0.820728	0.0510079	0.923009	-2.81271	-8.3391
123.1	-5.82217	-1.93728	-1.45746	3.2033	-5.48634	-9.20208		123.1	-3.66718	-0.322703	0.291207	0.964997	-2.48839	-8.48544
123.2	-4.66458	-2.19173	-2.01602	2.25473	-5.36256	-10.8196		123.2	-3.64968	0.20972	0.502185	1.07901	-2.25916	-8.366
123.3	-3.08169	-2.08879	-1.97774	1.00278	-4.62621	-12.1425		123.3	-3.65114	0.691425	0.623359	1.21272	-2.13684	-8.03071
123.4	-1.46909	-1.68993	-1.40733	-0.235756	-3.31894	-12.8144		123.4	-3.6262	1.05759	0.608426	1.31812	-2.09876	-7.56824
123.5	-0.31198	-1.02635	-0.483708	-1.13826	-1.66712	-12.6491		123.5	-3.54825	1.28094	0.444941	1.36597	-2.0999	-7.0787
123.6	0.0487146	-0.0581605	0.583877	-1.49337	-0.0384345	-11.6485		123.6	-3.41228	1.37537	0.164178	1.34914	-2.09065	-6.64013
123.7	-0.42984	1.29317	1.59511	-1.25853	1.15809	-9.94277		123.7	-3.22948	1.38372	-0.167762	1.27731	-2.03257	-6.28547
123.8	-1.47936	2.97494	2.35863	-0.554723	1.63647	-7.72538		123.8	-3.02166	1.35802	-0.47565	1.16994	-1.90605	-5.99873
123.9	-2.67517	4.67583	2.70971	0.390985	1.34919	-5.19936		123.9	-2.82095	1.34406	-0.701174	1.05517	-1.71172	-5.73147
124	-3.62372	5.94108	2.52682	1.30028	0.498008	-2.64653		124	-2.67037	1.37228	-0.817179	0.972191	-1.46968	-5.42592
124.1	-4.10427	6.37532	1.77044	1.96188	-0.576812	-0.452537		124.1	-2.62059	1.45407	-0.83034	0.966268	-1.21962	-5.03711
124.2	-4.11253	5.79694	0.487933	2.2987	-1.54463	0.978946		124.2	-2.7173	1.58176	-0.772329	1.07509	-1.01932	-4.54729
124.3	-3.80445	4.33138	-1.13611	2.35945	-2.19614	1.40459		124.3	-2.98083	1.73036	-0.683679	1.31575	-0.93206	-3.97084
124.4	-3.40328	2.39368	-2.7553	2.24066	-2.48313	0.853575		124.4	-3.38975	1.86106	-0.599669	1.67886	-1.00731	-3.34756
124.5	-3.08669	0.507489	-3.96465	2.0422	-2.45602	-0.385215		124.5	-3.88199	1.92576	-0.544026	2.12946	-1.26144	-2.73
124.6	-2.94261	-0.893708	-4.48783	1.84102	-2.19385	-1.867		124.6	-4.37293	1.87296	-0.527638	2.61602	-1.66707	-2.17443
124.7	-2.99341	-1.5549	-4.26635	1.72262	-1.79087	-3.17728		124.7	-4.7834	1.6585	-0.548492	3.08587	-2.15852	-1.7381
124.8	-3.26241	-1.45755	-3.42954	1.79259	-1.37154	-4.00776		124.8	-5.06227	1.26172	-0.592494	3.49929	-2.65002	-1.4736
124.9	-3.81823	-0.801171	-2.23975	2.15404	-1.11163	-4.20972		124.9	-5.19687	0.69761	-0.634848	3.83897	-3.06094	-1.41642
125	-4.72576	0.0819137	-0.991552	2.85267	-1.221	-3.8156		125	-5.21046	0.0194825	-0.641871	4.1086	-3.33604	-1.5692
125.1	-5.9492	0.836278	0.0997225	3.85548	-1.8356	-3.01459		125.1	-5.15052	-0.686453	-0.574838	4.32377	-3.45407	-1.89099
125.2	-7.26357	1.19555	0.944463	5.03472	-2.94638	-2.05335		125.2	-5.07253	-1.31975	-0.39929	4.50061	-3.42526	-2.30248
125.3	-8.31932	1.04172	1.5298	6.16676	-4.35858	-1.14996		125.3	-5.02478	-1.7949	-0.0983586	4.64914	-3.27917	-2.70763
125.4	-8.77587	0.39556	1.8737	7.01298	-5.7377	-0.498153		125.4	-5.04033	-2.0673	0.319382	4.77262	-3.05312	-3.02125
125.5	-8.45735	-0.670876	2.00411	7.43277	-6.71814	-0.307749		125.5	-5.13284	-2.14393	0.819891	4.87096	-2.78481	-3.19154
125.6	-7.41587	-2.06946	1.96168	7.41907	-7.00631	-0.702934		125.6	-5.29436	-2.07771	1.34832	4.94214	-2.50612	-3.2089
125.7	-5.91197	-3.64879	1.8068	7.07495	-6.48772	-1.67439		125.7	-5.49542	-1.94597	1.83725	4.98053	-2.23807	-3.10456
125.8	-4.33533	-5.15285	1.65105	6.54552	-5.25339	-3.04983		125.8	-5.68769	-1.82308	2.22272	4.97395	-1.98877	-2.93703
125.9	-3.09356	-6.20396	1.62749	5.95653	-3.55126	-4.49143		125.9	-5.81151	-1.76006	2.46235	4.90254	-1.75216	-2.77067
126	-2.47863	-6.43464	1.84822	5.36578	-1.70625	-5.59072		126	-5.80838	-1.77527	2.54897	4.7406	-1.50917	-2.65386
126.1	-2.59145	-5.68391	2.36053	4.76571	0.000251939	-6.03406		126.1	-5.63595	-1.85665	2.51222	4.46639	-1.22732	-2.60691
126.2	-3.35106	-4.12338	3.13694	4.14142	1.38685	-5.71676		126.2	-5.27912	-1.9695	2.40812	4.07765	-0.864588	-2.62399
126.3	-4.5154	-2.19629	4.02081	3.51277	2.36744	-4.76194		126.3	-4.75804	-2.06622	2.3009	3.60055	-0.382133	-2.68126
126.4	-5.73921	-0.429155	4.71694	2.93264	2.94697	-3.47232		126.4	-4.12901	-2.09147	2.24537	3.08475	0.235993	-2.7429
126.5	-6.68042	0.781977	4.88234	2.44514	3.18525	-2.234		126.5	-3.4758	-1.98892	2.27522	2.59002	0.964907	-2.76924
126.6	-7.08685	1.28797	4.31323	2.04231	3.1264	-1.36167		126.6	-2.88756	-1.71334	2.40032	2.17156	1.7369	-2.72081
126.7	-6.8306	1.15323	3.08215	1.6387	2.80139	-0.987547		126.7	-2.43061	-1.24435	2.60911	1.86846	2.45794	-2.56073
126.8	-5.89604	0.57776	1.57216	1.10244	2.29532	-1.02888		126.8	-2.12779	-0.601281	2.87474	1.69649	3.03873	-2.2625
126.9	-4.33228	-0.187898	0.319839	0.373211	1.84509	-1.25508		126.9	-1.95334	0.151401	3.16171	1.64734	3.42351	-1.82488
127	-2.25324	-0.876822	-0.239978	-0.441855	1.80781	-1.4403		127	-1.84413	0.916313	3.42969	1.69546	3.60267	-1.28244
127.1	0.0826264	-1.2487	0.0509428	-1.09768	2.46403	-1.47176		127.1	-1.72026	1.59273	3.63527	1.80627	3.60735	-0.702627
127.2	2.23602	-1.10007	1.06009	-1.33588	3.79	-1.35574		127.2	-1.50892	2.10675	3.73859	1.94197	3.49125	-0.167827
127.3	3.6888	-0.326207	2.46925	-0.991284	5.38523	-1.15063		127.3	-1.16148	2.42931	3.71628	2.06815	3.30952	0.250247
127.4	4.08811	1.03612	3.93346	-0.0388836	6.63619	-0.851058		127.4	-0.661939	2.57665	3.5768	2.1611	3.10532	0.513984
[truncated: 723 more rows]

## Sheet: 10
20180420_c1
raw								filter
[truncated: 1,999 more rows]

## Sheet: 20
20180420_c1
[truncated: 2,000 more rows]

## Sheet: 30
20180420_c1
[truncated: 2,000 more rows]

[truncated: 1 more sheets: Fig 5d]
