# Supplementary material for: Visualizing synaptic plasticity in vivo by large-scale imaging of endogenous AMPA receptors
Source: eLife. 2021 Oct 18;10:e66809. doi: 10.7554/eLife.66809 (PMC8616579; doi:10.7554/eLife.66809)
Supplement: Figure 6—source data 1. [file elife-66809-fig6-data1.xlsx]

## Sheet: s3_20A
	Baseline1							Baseline2									Bleach0							Bleach2							Bleach5							Bleach10							Bleach20
Sp1	Red	AVG	AVG-Bg	Norm B	Norm CNT	Norm 0		Red	AVG	AVG-Bg	Norm B	Norm CNT	Norm 0		Baseline T		Red	AVG	AVG-Bg	Norm B	Norm CNT	Norm 0		Red	AVG	AVG-Bg	Norm B	Norm CNT	Norm 0		Red	AVG	AVG-Bg	Norm B	Norm CNT	Norm 0		Red	AVG	AVG-Bg	Norm B	Norm CNT	Norm 0		Red	AVG	AVG-Bg	Norm B	Norm CNT
8	420.544	498.157	469.816	0.83868	0.798961	0.220119	9	607.777	669.66	650.554	1.16132	1.22207	1.86148		560.185	8	257.062	326.556	312.868	0.558509	0.903552	0.625852	8		#DIV/0!	#DIV/0!	#DIV/0!	#DIV/0!	#DIV/0!	8	355.527	487.315	469.595	0.838285	0.89219	0.58178	8	390.852	613.014	578.461	1.03262	0.925921	0.712628	7	398.27	707.757	664.703	1.18658	0.898424
9	592.956						10	715.062								9	353.121						9							9	562.691						9	625.484						8	673.832
10	480.971						11	686.141								10	369.484						10							10	543.727						10	822.707						9	1051.17
	Green							Green									Green							Green							Green							Green							Green
8	255.066	276.972	194.331	0.891275	0.882167	0.542897	9	310.848	326.734	241.744	1.10873	1.12029	1.46664		218.038	8	242.5	268.423	156.632	0.718373	0.742218	0	4		#DIV/0!	#DIV/0!	#DIV/0!	#DIV/0!	#DIV/0!	8	233.586	265.963	159.774	0.732783	0.701051	-0.159697	8	227.203	270.973	183.799	0.842968	0.835742	0.362804	7	297.859	349.571	257.95	1.18305	1.02449
9	297.387						10	330.371								9	272.871						5							9	286.695						9	263.824						8	348.738
10	278.464						11	338.984								10	289.898						6							10	277.609						10	321.891						9	402.117
Sp2	Red							Red									Red							Red							Red							Red							Red
8	317.191	284.963	256.623	1.06092	1.01067	1.02974	8	222.676	246.259	227.153	0.939084	0.988212	0.967149		241.888	7	181.488	228.756	215.069	0.889127	1.43842	2.22183	5		#DIV/0!	#DIV/0!	#DIV/0!	#DIV/0!	#DIV/0!	8	308.715	283.612	265.892	1.09924	1.16992	1.47355	8	419.984	410.463	375.91	1.55407	1.39348	2.09658	8	452.023	425.048	381.994	1.57922	1.19572
9	319.586						9	292.16								8	266.457						6							9	314.711						9	459.246						9	473.547
10	218.113						10	223.941								9	238.324						7							10	227.41						10	352.16						10	349.574
	Green							Green									Green							Green							Green							Green							Green
8	285.934	304.714	222.073	0.976753	0.966772	0.907397	8	304.496	317.634	232.644	1.02325	1.03392	1.09453		227.358	7	236.27	252.884	141.093	0.620578	0.641176	0	5		#DIV/0!	#DIV/0!	#DIV/0!	#DIV/0!	#DIV/0!	8	254.211	254.592	148.403	0.652729	0.624464	-0.0465762	8	270.301	282.623	195.449	0.859652	0.852283	0.588329	8	279.34	308.858	217.236	0.955481	0.827422
9	326.75						9	328.648								8	262.027						6							9	271.961						9	301.641						9	327.492
10	301.457						10	319.758								9	260.355						7							10	237.605						10	275.926						10	319.742
Sp3	Red							Red									Red							Red							Red							Red							Red
7	287.44	343.794	315.453	1.01285	0.964884	0.924419	8	356.386	326.554	307.448	0.987148	1.03879	1.08349		311.451	7	215.198	231.137	217.449	0.698182	1.12951	1.27875	3		#DIV/0!	#DIV/0!	#DIV/0!	#DIV/0!	#DIV/0!	7	280.271	285.973	268.253	0.861301	0.916687	0.820685	7	347.599	308.018	273.464	0.878034	0.787304	0.542215	7	392.222	385.043	341.99	1.09805	0.831398
8	416.005						9	366.536								8	266.019						4							8	319.435						8	337.807						8	455.251
9	327.937						10	256.739								9	212.193						5							9	258.213						9	238.647						9	307.657
	Green							Green									Green							Green							Green							Green							Green
7	364.053	359	276.359	1.0194	1.00899	1.01934	8	363.039	350.829	265.839	0.980597	0.990826	0.980256		271.099	7	242.517	252.269	140.478	0.518181	0.535381	0	3		#DIV/0!	#DIV/0!	#DIV/0!	#DIV/0!	#DIV/0!	7	258.068	276.034	169.845	0.626505	0.599375	0.137734	7	267.024	253.303	166.129	0.612798	0.607545	0.155319	7	258.705	267.089	175.467	0.647243	0.560496
8	381.227						9	353.391								8	272.092						4							8	280.937						8	265.507						8	289.406
9	331.72						10	336.058								9	242.198						5							9	289.097						9	227.377						9	253.155
Sp4	Red							Red									Red							Red							Red							Red							Red
8	298.966	322.035	293.695	1.07158	1.02083	1.0546	8	274.992	273.564	254.459	0.928421	0.976991	0.939685		274.077	8	213.485	234.335	220.647	0.805057	1.30242	1.79275	3		#DIV/0!	#DIV/0!	#DIV/0!	#DIV/0!	#DIV/0!	8	316.61	317.705	299.985	1.09453	1.16491	1.43229	8	263.674	342.323	307.77	1.12293	1.0069	1.01808	8	468.989	449.962	406.908	1.48465	1.12411
9	357.587						9	300.383								9	268.307						4							9	359.538						9	387.818						9	509.352
10	309.553						10	245.318								10	221.212						5							10	276.966						10	375.477						10	371.545
	Green							Green									Green							Green							Green							Green							Green
8	323.833	333.13	250.489	1.02977	1.01925	1.05046	8	338.625	320.995	236.005	0.970227	0.980348	0.948484		243.247	8	252.258	257.41	145.62	0.59865	0.618521	0	3		#DIV/0!	#DIV/0!	#DIV/0!	#DIV/0!	#DIV/0!	8	291.193	279.713	173.524	0.713367	0.682476	0.16765	8	229.045	247.463	160.289	0.658958	0.65331	0.0911939	8	286.299	303.199	211.578	0.869807	0.75323
9	355.917						9	326.432								9	270.356						4							9	286.114						9	259.716						9	332.011
10	319.64						10	297.928								10	249.617						5							10	261.833						10	253.629						10	291.288
Sp5	Red							Red									Red							Red							Red							Red							Red
5	365.142	495.026	466.685	1.02549	0.976921	0.942296	6	498.281	462.593	443.488	0.974513	1.02549	1.06374		455.087	5	207.295	263.019	249.331	0.547877	0.886352	0.715848	4		#DIV/0!	#DIV/0!	#DIV/0!	#DIV/0!	#DIV/0!	6	478.356	416.12	398.4	0.875437	0.931732	0.82931	6	500.537	467.414	432.86	0.95116	0.852875	0.632147	6	603.676	547.044	503.99	1.10746	0.838521
6	581.445						7	517.673								6	293.498						5							7	460.434						7	511.523						7	607.189
7	538.491						8	371.826								7	288.263						6							8	309.569						8	390.181						8	430.267
	Green							Green									Green							Green							Green							Green							Green
5	356.641	394.626	311.985	1.00831	0.998002	0.995004	6	411.057	391.836	306.846	0.991695	1.00204	1.0051		309.416	5	262.075	291.489	179.698	0.580766	0.600043	0	4		#DIV/0!	#DIV/0!	#DIV/0!	#DIV/0!	#DIV/0!	6	323.452	319.732	213.543	0.690148	0.660262	0.150564	6	314.651	319.56	232.386	0.751048	0.74461	0.361457	6	371.534	360.154	268.532	0.867869	0.751553
6	414.836						7	419								6	311.224						5							7	334.302						7	342.573						7	374.964
7	412.402						8	345.452								7	301.167						6							8	301.441						8	301.456						8	333.964
Sp6	Red							Red									Red							Red							Red							Red							Red
6	373.269	526.536	498.195	0.984351	0.937732	0.832548	7	546.904	533.142	514.036	1.01565	1.06878	1.18497		506.116	6	326.808	427.136	413.449	0.816906	1.32158	1.86481	5		#DIV/0!	#DIV/0!	#DIV/0!	#DIV/0!	#DIV/0!	6	326.046	469.721	452.001	0.893078	0.950507	0.866902	7	644.815	629.155	594.602	1.17483	1.05344	1.1437	7	732.964	724.721	681.668	1.34686	1.01978
7	625.262						8	612.861								7	491.055						6							7	551.365						8	690.651						8	828.464
8	581.077						9	439.661								8	463.546						7							8	531.752						9	552						9	612.736
	Green							Green									Green							Green							Green							Green							Green
6	317.733	349.632	266.991	1.04642	1.03572	1.09607	7	338.865	328.296	243.305	0.953584	0.963532	0.901928		255.148	6	247.615	266.912	155.121	0.607965	0.628146	0	5		#DIV/0!	#DIV/0!	#DIV/0!	#DIV/0!	#DIV/0!	6	250.536	272.823	166.634	0.653087	0.624806	-0.008981	7	296.781	278.901	191.727	0.751433	0.744992	0.314226	7	327.476	318.063	226.442	0.887491	0.768544
7	379.351						8	359.577								7	280.724						6							7	290.166						8	291.863						8	355.171
8	351.812						9	286.445								8	272.397						7							8	277.767						9	248.058						9	271.543
Sp7	Red							Red									Red							Red							Red							Red							Red
6		#DIV/0!	#DIV/0!	#DIV/0!	#DIV/0!	#DIV/0!	6		#DIV/0!	#DIV/0!	#DIV/0!	#DIV/0!	#DIV/0!		#DIV/0!	5		#DIV/0!	#DIV/0!	#DIV/0!	#DIV/0!	#DIV/0!	4		#DIV/0!	#DIV/0!	#DIV/0!	#DIV/0!	#DIV/0!	4		#DIV/0!	#DIV/0!	#DIV/0!	#DIV/0!	#DIV/0!	120		#DIV/0!	#DIV/0!	#DIV/0!	#DIV/0!	#DIV/0!	4		#DIV/0!	#DIV/0!	#DIV/0!	#DIV/0!
7							7									6							5							5							150							5
8							8									7							6							6							180							6
	Green							Green									Green							Green							Green							Green							Green
6		#DIV/0!	#DIV/0!	#DIV/0!	#DIV/0!	#DIV/0!	6		#DIV/0!	#DIV/0!	#DIV/0!	#DIV/0!	#DIV/0!		#DIV/0!	5		#DIV/0!	#DIV/0!	#DIV/0!	#DIV/0!	#DIV/0!	4		#DIV/0!	#DIV/0!	#DIV/0!	#DIV/0!	#DIV/0!	4		#DIV/0!	#DIV/0!	#DIV/0!	#DIV/0!	#DIV/0!	120		#DIV/0!	#DIV/0!	#DIV/0!	#DIV/0!	#DIV/0!	4		#DIV/0!	#DIV/0!	#DIV/0!	#DIV/0!
7							7									6							5							5							150							5
8							8									7							6							6							180							6
Sp8	Red							Red									Red							Red							Red							Red							Red
5		#DIV/0!	#DIV/0!	#DIV/0!	#DIV/0!	#DIV/0!	5		#DIV/0!	#DIV/0!	#DIV/0!	#DIV/0!	#DIV/0!		#DIV/0!	3		#DIV/0!	#DIV/0!	#DIV/0!	#DIV/0!	#DIV/0!	3		#DIV/0!	#DIV/0!	#DIV/0!	#DIV/0!	#DIV/0!	2		#DIV/0!	#DIV/0!	#DIV/0!	#DIV/0!	#DIV/0!	90		#DIV/0!	#DIV/0!	#DIV/0!	#DIV/0!	#DIV/0!	3		#DIV/0!	#DIV/0!	#DIV/0!	#DIV/0!
6							6									4							4							3							120							4
7							7									5							5							4							150							5
	Green							Green									Green							Green							Green							Green							Green
5		#DIV/0!	#DIV/0!	#DIV/0!	#DIV/0!	#DIV/0!	5		#DIV/0!	#DIV/0!	#DIV/0!	#DIV/0!	#DIV/0!		#DIV/0!	3		#DIV/0!	#DIV/0!	#DIV/0!	#DIV/0!	#DIV/0!	3		#DIV/0!	#DIV/0!	#DIV/0!	#DIV/0!	#DIV/0!	2		#DIV/0!	#DIV/0!	#DIV/0!	#DIV/0!	#DIV/0!	90		#DIV/0!	#DIV/0!	#DIV/0!	#DIV/0!	#DIV/0!	3		#DIV/0!	#DIV/0!	#DIV/0!	#DIV/0!
6							6									4							4							3							120							4
7							7									5							5							4							150							5
Sp9	Red							Red									Red							Red							Red							Red							Red
5		#DIV/0!	#DIV/0!	#DIV/0!	#DIV/0!	#DIV/0!	5		#DIV/0!	#DIV/0!	#DIV/0!	#DIV/0!	#DIV/0!		#DIV/0!	3		#DIV/0!	#DIV/0!	#DIV/0!	#DIV/0!	#DIV/0!	3		#DIV/0!	#DIV/0!	#DIV/0!	#DIV/0!	#DIV/0!	2		#DIV/0!	#DIV/0!	#DIV/0!	#DIV/0!	#DIV/0!	60		#DIV/0!	#DIV/0!	#DIV/0!	#DIV/0!	#DIV/0!	2		#DIV/0!	#DIV/0!	#DIV/0!	#DIV/0!
6							6									4							4							3							90							3
7							7									5							5							4							120							4
	Green							Green									Green							Green							Green							Green							Green
5		#DIV/0!	#DIV/0!	#DIV/0!	#DIV/0!	#DIV/0!	5		#DIV/0!	#DIV/0!	#DIV/0!	#DIV/0!	#DIV/0!		#DIV/0!	3		#DIV/0!	#DIV/0!	#DIV/0!	#DIV/0!	#DIV/0!	3		#DIV/0!	#DIV/0!	#DIV/0!	#DIV/0!	#DIV/0!	2		#DIV/0!	#DIV/0!	#DIV/0!	#DIV/0!	#DIV/0!	60		#DIV/0!	#DIV/0!	#DIV/0!	#DIV/0!	#DIV/0!	2		#DIV/0!	#DIV/0!	#DIV/0!	#DIV/0!
6							6									4							4							3							90							3
7							7									5							5							4							120							4
Sp10	Red							Red									Red							Red							Red							Red							Red
															#DIV/0!
	Green							Green									Green							Green							Green							Green							Green
															#DIV/0!
		AVG RED	#DIV/0!	AVG GRN	#DIV/0!				AVG RED	#DIV/0!	AVG GRN	#DIV/0!						AVG RED	#DIV/0!	AVG GRN	#DIV/0!				AVG RED	#DIV/0!	AVG GRN	#DIV/0!				AVG RED	#DIV/0!	AVG GRN	#DIV/0!				AVG RED	#DIV/0!	AVG GRN	#DIV/0!				AVG RED	#DIV/0!	AVG GRN	#DIV/0!
		AVG RED0	#DIV/0!	AVG GRN0	#DIV/0!				AVG RED0	#DIV/0!	AVG GRN0	#DIV/0!						AVG RED0	#DIV/0!	AVG GRN0	#DIV/0!				AVG RED0	#DIV/0!	AVG GRN0	#DIV/0!				AVG RED0	#DIV/0!	AVG GRN0	#DIV/0!				AVG RED0	#DIV/0!	AVG GRN0	#DIV/0!				AVG RED0	#DIV/0!	AVG GRN0	#DIV/0!
bg1	Red	AVG	AVG Total				bg1	Red	AVG	AVG Total						bg1	Red	AVG	AVG Total				bg1	Red	AVG	AVG Total				bg1	Red	AVG	AVG Total				bg1	Red	AVG	AVG Total				bg1	Red	AVG	AVG Total
5	16.9398	18.7994	28.3405				5	9.85648	9.84645	19.1057						5	6.87963	6.46682	13.6872				3		#DIV/0!	#DIV/0!				5	9.52315	10.6366	17.7202				5	26.3704	23.6111	34.5535				5	27.5463	32.4267	43.0538
6	20.1528						6	10.4028								6	5.80556						4							6	11.4537						6	26.6065						6	29.213
7	17.5833						7	9.97222								7	4.26852						5							7	8.22685						7	21.7546						7	31.7222
8	16.162						8	8.37963								8	5.9537						6							8	9.46296						8	22.3287						8	35
9	22.4537						9	8.79167								9	8.03704						7							9	12.1574						9	20.5694						9	35.6806
10	19.5046						10	11.6759								10	7.85648						8							10	12.9954						10	24.037						10	35.3981
	Green							Green									Green							Green							Green							Green							Green
5	47.8472	49.2646	82.6409				5	45.8611	49.1975	84.9905						5	70.537	72.2222	111.791				3		#DIV/0!	#DIV/0!				5	67.963	69.2616	106.189				5	60.2269	49.3141	87.1739				5	40.838	55.5108	91.6217
6	46.4213						6	49.25								6	70.6296						4							6	72.1898						6	46.7546						6	59.4954
7	62.7222						7	50.5093								7	77.8611						5							7	75.0185						7	37.3981						7	61.7361
8	46.2315						8	50.6528								8	70.9954						6							8	66.8472						8	44.1065						8	58.6806
9	48.4398						9	49.8194								9	67.6481						7							9	64.0648						9	52.9167						9	54.3102
10	43.9259						10	49.0926								10	75.662						8							10	69.4861						10	54.4815						10	58.0046
bg2	Red						bg2	Red								bg2	Red						bg2	Red						bg2	Red						bg2	Red						bg2	Red
5	49.213	43.946					5	33.2546	32.7924							5	25.6389	24.9136					3		#DIV/0!					5	33.7315	29.8434					5	57.4815	52.4522					5	69.7685	60.0239
6	48.1389						6	37.9815								6	23.9398						4							6	31.8889						6	54.5556						6	65.3333
7	44.7361						7	36.7454								7	24.9907						5							7	28.7963						7	49.7361						7	61.3889
8	39.8287						8	36.0185								8	29.1574						6							8	29.3009						8	52.7222						8	53.9907
9	40.3519						9	29.4537								9	25.6343						7							9	28.9074						9	52.537						9	55.1204
10	41.4074						10	23.3009								10	20.1204						8							10	26.4352						10	47.6806						10	54.5417
	Green							Green									Green							Green							Green							Green							Green
5	157	141.542					5	167.866	154.282							5	184.088	184.721					3		#DIV/0!					5	194.107	177.465					5	177.509	160.962					5	170.273	159.855
6	148.37						6	163.634								6	166.079						4							6	188.088						6	159.778						6	164.514
7	141.199						7	141.625								7	170.708						5							7	182.81						7	144.236						7	161.278
8	134.838						8	152.486								8	206.143						6							8	175.19						8	151.278						8	145.268
9	122.417						9	145.366								9	201.838						7							9	161.407						9	174.963						9	154.074
10	145.426						10	154.713								10	179.472						8							10	163.19						10	158.009						10	163.722
bg3	Red						bg3	Red								bg3	Red						bg3	Red						bg3	Red						bg3	Red						bg3	Red
5	23.2824	22.2762					5	15.6481	14.6782							5	8.63889	9.68133					3		#DIV/0!					5	12.8519	12.6806					5	28.1389	27.5972					5	45.1944	36.7106
6	25.5926						6	14.9722								6	10.9398						4							6	11.9444						6	28.3333						6	41.1898
7	21.5093						7	18.0093								7	10.7639						5							7	13.8704						7	28.0046						7	35.5046
8	20.6944						8	14.5278								8	11.0417						6							8	14.6852						8	28.4167						8	33.9028
9	20.0694						9	12.6481								9	8.14352						7							9	12.3241						9	25.8889						9	30.8935
10	22.5093						10	12.2639								10	8.56019						8							10	10.4074						10	26.8009						10	33.5787
	Green							Green									Green							Green							Green							Green							Green
5	54.0602	57.1165					5	56.6204	51.4923							5	76.5972	78.4282					3		#DIV/0!					5	77.9769	71.8403					5	56.2037	51.2454					5	68.4769	59.4992
6	65.1991						6	41.4722								6	82.5509						4							6	74.037						6	47.5278						6	58.5648
7	59.0324						7	48.7546								7	82.9167						5							7	74.9213						7	45.3333						7	63.0926
8	56.4722						8	54.4676								8	76.1898						6							8	67.0694						8	48.662						8	62.1065
9	55.338						9	53.8889								9	75.7593						7							9	68.3426						9	52.3565						9	52.6991
10	52.5972						10	53.75								10	76.5556						8							10	68.6944						10	57.3889						10	52.0556
	Baseline1							Baseline2									Bleach0							Bleach2							Bleach5							Bleach10							Bleach20
cnt1	Red	AVG	AVG-Bg	AVG total	Norm B		cnt1	Red	AVG	AVG-Bg	AVG total	Norm B			Baseline T	cnt1	Red	AVG	AVG-Bg	AVG total	Norm B		cnt1	Red	AVG	AVG-Bg	AVG total	Norm B		cnt1	Red	AVG	AVG-Bg	AVG total	Norm B		cnt1	Red	AVG	AVG-Bg	AVG total	Norm B		cnt1	Red	AVG	AVG-Bg	AVG total	Norm B
4	245.22	281.646	253.305	241.636	1.04971		4	221.661	253.261	234.156	218.749	0.950286			230.192	4	188.551	194.009	180.321	142.288	0.618126		6		#DIV/0!	#DIV/0!	#DIV/0!	#DIV/0!		4	185.559	229.11	211.39	216.284	0.939581		4	251.653	294.054	259.501	256.72	1.11524		4	348.992	409.269	366.215	304.022	1.32073
5	337.242						5	266.263								5	212.835						7							5	265.453						5	325.017						5	440.818
6	262.475						6	271.86								6	180.64						8							6	236.318						6	305.492						6	437.996
	Green							Green									Green							Green							Green							Green							Green
4	390.564	379.692	297.051	236.498	1.01032		4	345.352	355.42	270.429	231.665	0.989676			234.081	4	369.343	375.791	264	226.561	0.967873		6		#DIV/0!	#DIV/0!	#DIV/0!	#DIV/0!		4	394.669	379.34	273.151	244.677	1.04526		4	353.034	355.958	268.784	236.105	1.00865		4	439.199	431.421	339.799	270.31	1.15477
5	381.839						5	382.958								5	403.246						7							5	403.203						5	374.843						5	437.14
6	366.674						6	337.949								6	354.784						8							6	340.148						6	339.996						6	417.924
cnt2	Red						cnt2	Red								cnt2	Red						cnt2	Red						cnt2	Red						cnt2	Red						cnt2	Red
7	248.915	232.733	204.392				7	198.339	193.093	173.988						6	121.89	149.945	136.258				4		#DIV/0!	#DIV/0!				6	107.924	159.429	141.709				7	246.271	265.641	231.088				7	278.148	286.256	243.202
8	248.72						8	223.047								7	165.551						5							7	182.258						8	280.225						8	319.318
9	200.564						9	157.894								8	162.394						6							8	188.106						9	270.428						9	261.301
	Green							Green									Green							Green							Green							Green							Green
7	312.076	290.571	207.93				7	313.686	294.921	209.93						6	352.636	355.04	243.249				4		#DIV/0!	#DIV/0!				6	348.013	357.283	251.094				7	320.932	315.086	227.912				7	368.483	360.278	268.657
8	286.229						8	282.805								7	365.318						5							7	371.492						8	325.699						8	355.157
9	273.407						9	288.271								8	347.165						6							8	352.343						9	298.627						9	357.195
cnt3	Red						cnt3	Red								cnt3	Red						cnt3	Red						cnt3	Red						cnt3	Red						cnt3	Red
5	271.44	267.375	239.035				5	153.493	194.818	175.712						5	104.826	122.823	109.135				4		#DIV/0!	#DIV/0!				5	153.261	187.828	170.108				5	174.541	232.396	197.842				5	246.72	294.746	251.692
6	288.512						6	221.792								6	147.077						5							6	222.758						6	270.657						6	326.937
7	242.174						7	209.169								7	116.565						6							7	187.464						7	251.99						7	310.58
	Green							Green									Green							Green							Green							Green							Green
5	374.676	405.515	322.874				5	412.155	448.776	363.786						5	443.879	412.042	300.251				4		#DIV/0!	#DIV/0!				5	394.454	436.219	330.03				5	407.71	406.23	319.056				5	391.478	449.08	357.459
6	456.121						6	483.343								6	425.498						5							6	447.99						6	423.362						6	504.034
7	385.749						7	450.831								7	366.749						6							7	466.213						7	387.618						7	451.729
cnt4	Red						cnt4	Red								cnt4	Red						cnt4	Red						cnt4	Red						cnt4	Red						cnt4	Red
5	192.425	238.894	210.553				5	235.174	255.541	236.436						5	149.99	128.979	115.292				5		#DIV/0!	#DIV/0!				4	336.266	389.026	371.306				4	301.841	336.68	302.126				5	302.101	331.884	288.83
6	332.7						6	296.126								6	141.058						6							5	448.256						5	391.435						6	404.372
7	191.556						7	235.324								7	95.889						7							6	382.556						6	316.763						7	289.179
	Green							Green									Green							Green							Green							Green							Green
5	253.86	293.348	210.707				5	247.826	255.578	170.588						5	290.536	289.792	178.002				5		#DIV/0!	#DIV/0!				4	336.512	328.657	222.468				4	293.295	299.327	212.153				5	317.256	303.401	211.779
6	324.227						6	271.396								6	303.435						6							5	337.111						5	310.101						6	304.01
7	301.957						7	247.512								7	275.406						7							6	312.348						6	294.584						7	288.937
cnt5	Red						cnt5	Red								cnt5	Red						cnt5	Red						cnt5	Red						cnt5	Red						cnt5	Red
3	364.303	364.971	336.63				3	278.228	323.044	303.938						3	186.627	195.403	181.716				5		#DIV/0!	#DIV/0!				3	288.496	316.753	299.033				3	277.298	303.305	268.752				3	438.193	447.025	403.971
4	437.702						4	373.509								4	222.57						6							4	385.623						4	352.899						4	532.934
5	292.908						5	317.395								5	177.013						7							5	276.14						5	279.719						5	369.947
	Green							Green									Green							Green							Green							Green							Green
3	267.36	326.44	243.799				3	308.746	338.986	253.995						3	314.232	349.114	237.323				5		#DIV/0!	#DIV/0!				3	321.851	359.652	253.463				3	284.842	308.009	220.835				3	323.303	365.053	273.431
4	372.965						4	351.895								4	366.228						6							4	379.509						4	330.912						4	375.961
5	338.996						5	356.316								5	366.882						7							5	377.596						5	308.272						5	395.895
cnt6	Red						cnt6	Red								cnt6	Red						cnt6	Red						cnt6	Red						cnt6	Red						cnt6	Red
3	321.847	280.528	252.187				3	221.329	209.168	190.063						3	93.6065	96.4429	82.7557				7		#DIV/0!	#DIV/0!				3	140.009	155.082	137.362				3	295.398	303.367	268.814				3	360.06	337.693	294.639
4	314						4	216.491								4	101.583						8							4	180.903						4	343.403						4	377.236
5	205.736						5	189.685								5	94.1389						9							5	144.333						5	271.301						5	275.782
	Green							Green									Green							Green							Green							Green							Green
3	324.833	355.342	272.701				3	306.954	334.866	249.875						3	317.532	358.544	246.754				7		#DIV/0!	#DIV/0!				3	301.449	344.366	238.177				3	302	345.383	258.209				3	345.37	351.23	259.608
4	355.319						4	337.106								4	338.944						8							4	359.94						4	344.097						4	345.958
5	385.875						5	360.537								5	419.157						9							5	371.708						5	390.051						5	362.361
cnt7	Red						cnt7	Red								cnt7	Red						cnt7	Red						cnt7	Red						cnt7	Red						cnt7	Red
4	274.199	260.015	231.675				4	225.597	233.248	214.143						3	132.301	158.806	145.118				6		#DIV/0!	#DIV/0!				4	162.111	185.523	167.803				3	231.111	270.56	236.007				3	302.931	349.283	306.229
5	315.583						5	239.421								4	182.019						7							5	188.394						4	273.431						4	369.287
6	190.264						6	234.727								5	162.097						8							6	206.065						5	307.139						5	375.63
	Green							Green									Green							Green							Green							Green							Green
4	275.963	257.744	175.103				4	272.44	271.62	186.63						3	274.449	289.082	177.291				6		#DIV/0!	#DIV/0!				4	268.306	283.996	177.807				3	290.708	285.005	197.831				3	304.68	327.562	235.94
5	260.116						5	268.333								4	289.088						7							5	288.153						4	287.056						4	349.356
6	237.153						6	274.088								5	303.708						8							6	295.528						5	277.25						5	328.648
cnt8	Red						cnt8	Red								cnt8	Red						cnt8	Red						cnt8	Red						cnt8	Red						cnt8	Red
2	201.347	242.702	214.361				2	234.181	234.537	215.431						2	182.676	199.68	185.993				5		#DIV/0!	#DIV/0!				2	228.296	246.546	228.826				2	357.995	349.984	315.431				3	408.528	321.333	278.28
3	310.903						3	251.944								3	212.745						6							3	250.495						3	360.546						4	323.449
4	215.856						4	217.486								4	203.62						7							4	260.847						4	331.412						5	232.023
	Green							Green									Green							Green							Green							Green							Green
2	223.093	242.554	159.913				2	233.671	251.946	166.956						2	297.213	291.415	179.625				5		#DIV/0!	#DIV/0!				2	313.005	312.256	206.067				2	312.394	290.226	203.052				3	338.44	303.702	212.08
3	243.694						3	266.375								3	283.63						6							3	328.764						3	303.681						4	302.009
4	260.875						4	255.792								4	293.403						7							4	295						4	254.602						5	270.657
cnt9	Red						cnt9	Red								cnt9	Red						cnt9	Red						cnt9	Red						cnt9	Red						cnt9	Red
9	292.639	260.926	232.585				9	262.532	243.977	224.871						9	179.264	157.688	144.001				5		#DIV/0!	#DIV/0!				9	268.056	236.742	219.022				8	189.009	265.471	230.917				8	291.134	346.196	303.142
10	316.532						10	273.171								10	180.764						6							10	259.935						9	315.273						9	399.958
11	173.606						11	196.227								11	113.037						7							11	182.236						10	292.13						10	347.495
	Green							Green									Green							Green							Green							Green							Green
9	327.931	321.042	238.401				9	306.25	297.783	212.792						9	316.792	324.344	212.553				5		#DIV/0!	#DIV/0!				9	352.25	356.022	249.833				8	270.606	304.288	217.114				8	327.819	365.654	274.033
10	314.806						10	319.931								10	333.634						6							10	367.926						9	318.713						9	383.931
11	320.389						11	267.167								11	322.606						7							11	347.889						10	323.546						10	385.213
cnt10	Red						cnt10	Red								cnt10	Red						cnt10	Red						cnt10	Red						cnt10	Red						cnt10	Red
	Green							Green									Green							Green							Green							Green							Green
[truncated: 34 more columns]

## Sheet: s4_20A
	Baseline1							Baseline2									Bleach0							Bleach2							Bleach5							Bleach10							Bleach20
Sp1	Red	AVG	AVG-Bg	Norm B	Norm CNT	Norm 0		Red	AVG	AVG-Bg	Norm B	Norm CNT	Norm 0		Baseline T		Red	AVG	AVG-Bg	Norm B	Norm CNT	Norm 0		Red	AVG	AVG-Bg	Norm B	Norm CNT	Norm 0		Red	AVG	AVG-Bg	Norm B	Norm CNT	Norm 0		Red	AVG	AVG-Bg	Norm B	Norm CNT	Norm 0		Red	AVG	AVG-Bg	Norm B	Norm CNT
6	687.793	692.29	621.295	1.1081	1.06982	1.3721	6	547.347	557.193	500.074	0.891898	0.924997	0.600281		560.684	6	684.893	650.188	571.819	1.01986	1.13061	1.69607	4		#DIV/0!	#DIV/0!	#DIV/0!	#DIV/0!	#DIV/0!	6	633.333	674.313	615.097	1.09705	1.11288	1.60156	6	663.297	659.919	595.883	1.06278	0.996544	0.981583	6	740.393	739.522	660.559	1.17813	1.07976
7	780.55						7	626.53								7	717.31						5							7	748.62						7	718.677						7	826.143
8	608.527						8	497.703								8	548.36						6							8	640.987						8	597.783						8	652.03
	Green							Green									Green							Green							Green							Green							Green
6	335.767	316.938	170.086	1.09896	1.06435	1.34293	6	289.09	277.668	139.454	0.901039	0.931328	0.63402		154.77	6	285.857	270.689	115.512	0.746343	0.81236	0	4		#DIV/0!	#DIV/0!	#DIV/0!	#DIV/0!	#DIV/0!	6	297.093	268.942	140.449	0.90747	0.863822	0.27426	6	326.253	297.826	141.899	0.916835	0.847654	0.188091	6	315.777	312.21	147.197	0.951069	0.914602
7	327.44						7	283.267								7	271.497						5							7	280.63						7	298.257						7	321.597
8	287.607						8	260.647								8	254.713						6							8	229.103						8	268.967						8	299.257
Sp2	Red							Red									Red							Red							Red							Red							Red
7	565.241	531.718	460.723	1.02961	0.99404	0.982526	6	354.573	491.344	434.225	0.970391	1.0064	1.01877		447.474	6	305.299	389.46	311.092	0.695218	0.770715	0.32775	5		#DIV/0!	#DIV/0!	#DIV/0!	#DIV/0!	#DIV/0!	6	370.869	448.404	389.188	0.869744	0.882294	0.654893	6	358.774	412.19	348.154	0.778044	0.729555	0.207072	6	532.569	539.175	460.212	1.02847	0.942595
8	608.427						7	543.686								7	446.909						6							7	500.712						7	462.792						7	604.332
9	421.485						8	575.774								8	416.172						7							8	473.631						8	415.004						8	480.624
	Green							Green									Green							Green							Green							Green							Green
7	370.303	369.608	222.757	1.01661	0.984593	0.954826	6	345.964	353.69	215.476	0.983386	1.01644	1.04821		219.116	6	283.416	287.826	132.649	0.60538	0.658929	0	5		#DIV/0!	#DIV/0!	#DIV/0!	#DIV/0!	#DIV/0!	6	258.737	277.011	148.518	0.677805	0.645204	-0.0402397	6	314.493	321.353	165.426	0.754967	0.698	0.114555	6	327.139	308.123	143.11	0.653122	0.628079
8	383.602						7	366.657								7	299.46						6							7	282.398						7	340.31						7	318.084
9	354.92						8	348.449								8	280.602						7							8	289.898						8	309.255						8	279.146
Sp3	Red							Red									Red							Red							Red							Red							Red
7	329.227	421.607	350.612	1.04962	1.01336	1.03074	7	281.546	374.58	317.46	0.950376	0.985645	0.966977		334.036	7	375.912	440.016	361.647	1.08266	1.20023	1.46062	3		#DIV/0!	#DIV/0!	#DIV/0!	#DIV/0!	#DIV/0!	7	288.424	369.274	310.058	0.928218	0.941611	0.865681	7	336.055	374.668	310.633	0.929938	0.871982	0.705505	7	388.197	432.867	353.904	1.05948	0.971017
8	470.034						8	430.277								8	509.74						4							8	410.651						8	424.744						8	498.126
9	465.559						9	411.916								9	434.395						5							9	408.748						9	363.206						9	412.277
	Green							Green									Green							Green							Green							Green							Green
7	388.664	359.848	212.996	1.03825	1.00555	1.01277	7	319.303	335.514	197.3	0.961746	0.994075	0.98637		205.148	7	285.752	261.723	106.545	0.519358	0.565298	0	3		#DIV/0!	#DIV/0!	#DIV/0!	#DIV/0!	#DIV/0!	7	298.08	296.887	168.394	0.82084	0.781359	0.497033	7	325.004	277.186	121.259	0.59108	0.546479	-0.0432899	7	323.155	313.703	148.689	0.72479	0.697
8	351.034						8	342.702								8	266.197						4							8	312.374						8	284.609						8	336.34
9	339.845						9	344.538								9	233.219						5							9	280.206						9	221.945						9	281.613
Sp4	Red							Red									Red							Red							Red							Red							Red
7	673.429	807.881	736.887	0.844145	0.814983	0.297672	9	1064.4	1066.11	1008.99	1.15586	1.19875	1.75445		872.939	9	730.256	705.794	627.426	0.718751	0.796804	0.228663	3		#DIV/0!	#DIV/0!	#DIV/0!	#DIV/0!	#DIV/0!	9	907.42	967.44	908.224	1.04042	1.05543	1.21042	8	810.66	943.238	879.202	1.00718	0.944406	0.788966	8	1125.21	1338.91	1259.95	1.44334	1.32283
8	879.975						10	1156.54								10	750.706						4							10	1058.56						9	1001.02						9	1403.56
9	870.24						11	977.391								11	636.42						5							11	936.336						10	1018.03						10	1487.98
	Green							Green									Green							Green							Green							Green							Green
7	414.475	432.737	285.885	0.944561	0.914809	0.676614	9	451.193	457.658	319.444	1.05544	1.09092	1.34513		302.665	9	346.378	359.993	204.816	0.676708	0.736566	0	3		#DIV/0!	#DIV/0!	#DIV/0!	#DIV/0!	#DIV/0!	9	343.248	374.8	246.307	0.813794	0.774652	0.144576	8	408.26	418.641	262.714	0.868004	0.802508	0.250316	8	412.454	506.485	341.471	1.12822	1.08496
8	438.202						10	479.349								10	376.492						4							10	379.546						9	395.374						9	526.206
9	445.534						11	442.433								11	357.109						5							11	401.605						10	452.29						10	580.794
Sp5	Red							Red									Red							Red							Red							Red							Red
8	454.639	525.681	454.686	1.18882	1.14775	1.78604	7	292.462	367.368	310.249	0.811177	0.84128	0.155615		382.467	7	354.403	409.385	331.017	0.865477	0.959463	0.784347	4		#DIV/0!	#DIV/0!	#DIV/0!	#DIV/0!	#DIV/0!	7	353.055	409.345	350.129	0.915447	0.928656	0.620452	7	391.487	419.266	355.23	0.928786	0.870903	0.313208	7	447.088	498.154	419.191	1.09602	1.00451
9	577.958						8	411.202								8	446.454						5							8	463.416						8	464.387						8	540.248
10	544.445						9	398.441								9	427.298						6							9	411.563						9	401.924						9	507.126
	Green							Green									Green							Green							Green							Green							Green
8	376.929	386.008	239.157	1.0943	1.05983	1.31828	7	307.277	336.154	197.94	0.905704	0.936149	0.660317		218.548	7	312.168	318.223	163.045	0.746038	0.812028	0	4		#DIV/0!	#DIV/0!	#DIV/0!	#DIV/0!	#DIV/0!	7	265.05	275.283	146.79	0.671658	0.639353	-0.918624	7	333.525	324.909	168.982	0.773201	0.714857	-0.516944	7	381.382	359.356	194.342	0.889242	0.855146
9	408.361						8	358.441								8	335.063						5							8	291.748						8	345.504						8	351.105
10	372.735						9	342.744								9	307.437						6							9	269.05						9	295.697						9	345.58
Sp6	Red							Red									Red							Red							Red							Red							Red
6	748.584	754.855	683.861	1.0715	1.03448	1.11484	6	668.204	649.715	592.595	0.928501	0.962958	0.876641		638.228	5	516.734	599.604	521.235	0.816692	0.90538	0.684893	5		#DIV/0!	#DIV/0!	#DIV/0!	#DIV/0!	#DIV/0!	5	682.69	732.949	673.733	1.05563	1.07086	1.23599	5	614.942	645.089	581.053	0.910416	0.853678	0.512714	5	716.442	761.505	682.542	1.06943	0.980141
7	831.467						7	710.401								6	663.796						6							6	791.361						6	700.391						6	823.766
8	684.515						8	570.54								7	618.281						7							7	724.796						7	619.934						7	744.307
	Green							Green									Green							Green							Green							Green							Green
6	425.493	413.568	266.717	1.07279	1.039	1.12989	6	382.734	368.735	230.521	0.927207	0.958375	0.861379		248.619	5	313.679	315.004	159.826	0.642857	0.69972	0	5		#DIV/0!	#DIV/0!	#DIV/0!	#DIV/0!	#DIV/0!	5	344.197	325.759	197.266	0.793448	0.755285	0.185042	5	356.431	349.44	193.513	0.778354	0.719622	0.0662763	5	358.624	387.091	222.078	0.893246	0.858997
7	412.741						7	384.04								6	328.504						6							6	313.748						6	352.033						6	397.073
8	402.471						8	339.431								7	302.829						7							7	319.332						7	339.858						7	405.577
Sp7	Red							Red									Red							Red							Red							Red							Red
9	864.844	899.488	828.493	1.05551	1.01905	1.13508	9	762.435	798.468	741.348	0.944488	0.979538	0.854892		784.921	9	798.889	786.321	707.952	0.901941	0.999887	0.9992	4		#DIV/0!	#DIV/0!	#DIV/0!	#DIV/0!	#DIV/0!	9	910.391	920.715	861.499	1.09756	1.1134	1.80419	9	861.698	912.076	848.04	1.08042	1.01308	1.09277	9	1224.85	1118.73	1039.77	1.32468	1.21408
10	977.651						10	857.464								10	836.79						5							10	1041.42						10	991.349						10	1141.63
11	855.968						11	775.505								11	723.283						6							11	810.33						11	883.181						11	989.717
	Green							Green									Green							Green							Green							Green							Green
9	381.108	377.353	230.502	1.03501	1.00241	1.01709	9	353.095	353.122	214.908	0.96499	0.997428	0.981761		222.705	9	318.095	330.932	175.755	0.789182	0.858989	0	4		#DIV/0!	#DIV/0!	#DIV/0!	#DIV/0!	#DIV/0!	9	322.146	330.275	201.782	0.906053	0.862473	0.0247064	9	382.092	396.937	241.01	1.08219	1.00054	1.0038	9	416.905	428.206	263.192	1.1818	1.13649
10	372.99						10	374.197								10	342.511						5							10	347.689						10	408.667						10	431.575
11	377.962						11	332.073								11	332.19						6							11	320.99						11	400.051						11	436.137
Sp8	Red							Red									Red							Red							Red							Red							Red
7	435.343	398.215	327.22	1.10668	1.06844	1.20698	7	333.056	321.256	264.137	0.893324	0.926475	0.777653		295.678	6	266.917	286.576	208.207	0.704169	0.780638	0.336621	3		#DIV/0!	#DIV/0!	#DIV/0!	#DIV/0!	#DIV/0!	7	378.847	362.386	303.17	1.02534	1.04013	1.12136	6	334.157	374.239	310.203	1.04912	0.983741	0.950831	6	359.088	385.641	306.678	1.0372	0.950599
8	459.102						8	356.458								7	313.231						4							8	417.102						7	411.106						7	423.491
9	300.199						9	274.255								8	279.579						5							9	291.208						8	377.454						8	374.343
	Green							Green									Green							Green							Green							Green							Green
7	330.606	328.787	181.935	1.12871	1.09315	1.28171	7	263.486	278.657	140.443	0.871294	0.900583	0.699351		161.189	6	249.509	254.298	99.1205	0.614932	0.669326	0	3		#DIV/0!	#DIV/0!	#DIV/0!	#DIV/0!	#DIV/0!	7	247.5	241.168	112.675	0.699025	0.665403	-0.0118619	6	285.153	296.614	140.687	0.872807	0.806948	0.416187	6	312.949	300.407	135.394	0.839969	0.807763
8	336.778						8	279.741								7	255.468						4							8	248.579						7	301.384						7	316.167
9	318.977						9	292.745								8	257.917						5							9	227.426						8	303.305						8	272.106
Sp9	Red							Red									Red							Red							Red							Red							Red
6	964.095	918.662	847.667	1.02829	0.992766	0.970862	6	925.044	858.146	801.026	0.97171	1.00777	1.0313		824.347	6	828.927	767.264	688.896	0.835687	0.926438	0.703698	3		#DIV/0!	#DIV/0!	#DIV/0!	#DIV/0!	#DIV/0!	6	1060.9	951.754	892.538	1.08272	1.09834	1.39612	5	874.555	907.175	843.14	1.0228	0.959055	0.835077	5	899.04	936.143	857.18	1.03983	0.953009
7	996.343						7	908.08								7	837.215						4							7	988.861						6	960.807						6	955.281
8	795.547						8	741.314								8	635.65						5							8	805.5						7	886.164						7	954.109
	Green							Green									Green							Green							Green							Green							Green
6	485.876	493.815	346.963	1.00711	0.975393	0.900885	6	471.197	480.275	342.061	0.992885	1.02626	1.10578		344.512	6	393.489	393.112	237.935	0.690642	0.751733	0	3		#DIV/0!	#DIV/0!	#DIV/0!	#DIV/0!	#DIV/0!	6	451.989	410.607	282.114	0.81888	0.779494	0.111818	5	451.011	477.014	321.087	0.932004	0.861678	0.442851	5	408.916	462.428	297.415	0.863293	0.830192
7	500.142						7	481.708								7	413.741						4							7	409.27						6	500.088						6	487.124
8	495.427						8	487.92								8	372.106						5							8	370.562						7	479.942						7	491.245
Sp10	Red							Red									Red							Red							Red							Red							Red
7	318.227	335.095	264.1	1.06918	1.03225	1.07728	7	279.559	287.043	229.923	0.930819	0.965361	0.916984		247.012	7	282.09	298.314	219.945	0.890425	0.98712	0.969131								7	366.305	377.229	318.013	1.28744	1.30602	1.73341	7	361.977	360.184	296.148	1.19892	1.1242	1.29767	6	266.91	364.926	285.963	1.15769	1.06103
8	379.074						8	328.445								8	333.703													8	442.805						8	402.867						7	407.633
9	307.984						9	253.125								9	279.148													9	322.578						9	315.707						8	420.234
	Green							Green									Green							Green							Green							Green							Green
7	357.676	365.931	219.079	1.00504	0.97338	0.936201	7	289.801	355.098	216.884	0.994964	1.02841	1.06809		217.982	7	273.328	271.883	116.705	0.535391	0.582749	0								7	270.66	278.857	150.364	0.689802	0.656623	0.17705	7	320.707	337.509	181.582	0.833016	0.77016	0.449155	6	321.555	324.603	159.59	0.732124	0.704053
8	360.137						8	378.988								8	266.125													8	276.234						8	341.582						7	335.277
9	379.98						9	396.504								9	276.195													9	289.676						9	350.238						8	316.977
		AVG RED	1.01869	AVG GRN	1.01125				AVG RED	0.979918	AVG GRN	0.987997						AVG RED	0.945729	AVG GRN	0.71477				AVG RED	#DIV/0!	AVG GRN	#DIV/0!				AVG RED	1.05496	AVG GRN	0.742367				AVG RED	0.934715	AVG GRN	0.776844				AVG RED	1.04796	AVG GRN	0.851728
		AVG RED0	1.09965	AVG GRN0	1.07055				AVG RED0	0.892954	AVG GRN0	0.924702						AVG RED0	0.802429	AVG GRN0	0				AVG RED0	#DIV/0!	AVG GRN0	#DIV/0!				AVG RED0	1.16785	AVG GRN0	0.0296346				AVG RED0	0.709748	AVG GRN0	0.213538				AVG RED0	1.28366	AVG GRN0	0.615813
bg1	Red	AVG	AVG Total				bg1	Red	AVG	AVG Total						bg1	Red	AVG	AVG Total				bg1	Red	AVG	AVG Total				bg1	Red	AVG	AVG Total				bg1	Red	AVG	AVG Total				bg1	Red	AVG	AVG Total
5	75.2588	60.7131	70.9945				5	57.0549	46.3229	57.1198						5	76.102	65.0503	78.3682				3		#DIV/0!	#DIV/0!				5	53.749	52.4797	59.2161				5	67.7451	59.7503	64.0357				5	84	78.0281	78.963
6	68.3451						6	50.2941								6	67.2314						4							6	53.6392						6	64.6824						6	83.498
7	60.6549						7	43.4157								7	64.4157						5							7	49.6196						7	60.3725						7	83.0431
8	53.8078						8	45.4627								8	66.4667						6							8	53.0706						8	59.3176						8	75.2039
9	52.4784						9	40.5843								9	59.7137						7							9	58.6941						9	59.3843						9	73.5765
10	53.7333						10	41.1255								10	56.3725						8							10	46.1059						10	47						10	68.8471
	Green							Green									Green							Green							Green							Green							Green
5	122.823	111.074	146.852				5	113.592	100.448	138.214						5	136.682	114.816	155.177				3		#DIV/0!	#DIV/0!				5	79.5333	83.9961	128.493				5	100.635	91.7915	155.927				5	124.263	120.465	165.013
6	128.494						6	105.957								6	128.247						4							6	85.4824						6	92.9333						6	136.557
7	117.765						7	87.3529								7	120.337						5							7	98.4314						7	76.3765						7	136.423
8	112.118						8	105.298								8	106.035						6							8	87.6941						8	91.0902						8	116.874
9	86.0824						9	94.5255								9	104.055						7							9	75.4902						9	105.004						9	103.122
10	99.1608						10	95.9608								10	93.5373						8							10	77.3451						10	84.7098						10	105.553
bg2	Red						bg2	Red								bg2	Red						bg2	Red						bg2	Red						bg2	Red						bg2	Red
5	86.451	92.9144					5	71.9569	80.4634							5	92.6196	106.51					3		#DIV/0!					5	72.0863	79.2693					5	65.3412	71.5686					5	89.6745	86.4948
6	85.298						6	80.5529								6	94.298						4							6	70.1373						6	69.9098						6	88.7961
7	90.149						7	72.3294								7	105.863						5							7	69.9647						7	72.0745						7	76.9137
8	101.42						8	75.2745								8	113.075						6							8	77.2431						8	74.8039						8	82.6902
9	94.0196						9	86.3373								9	115.129						7							9	90.9686						9	74.4549						9	89.2627
10	100.149						10	96.3294								10	118.078						8							10	95.2157						10	72.8274						10	91.6314
	Green							Green									Green							Green							Green							Green							Green
5	155.463	163.082					5	136.106	134.278							5	164.263	160.18					3		#DIV/0!					5	140.231	139.67					5	176.028	179.001					5	154.726	166.25
6	168.757						6	140.835								6	156.09						4							6	145.761						6	183.326						6	159.341
7	173.42						7	136.984								7	165.047						5							7	141.302						7	177.6						7	170.682
8	164.486						8	144.643								8	153.4						6							8	141.506						8	172.984						8	163.957
9	168.573						9	128.098								9	156.416						7							9	144.514						9	177.769						9	157.988
10	147.796						10	119.004								10	165.867						8							10	124.706						10	186.298						10	190.804
bg3	Red						bg3	Red								bg3	Red						bg3	Red						bg3	Red						bg3	Red						bg3	Red
5	64.5843	59.3562					5	45.8471	44.5732							5	64.7373	63.5438					3		#DIV/0!					5	50.9882	45.8993					5	67.902	60.7882					5	70.6392	72.366
6	64.3608						6	48.7922								6	65.8824						4							6	45.0902						6	53.3686						6	73.0549
7	63.8941						7	42.5686								7	60.2667						5							7	46.9922						7	59.2941						7	76.5059
8	53.2902						8	44.2941								8	62.9882						6							8	47.9569						8	63.2118						8	77.8863
9	58.4824						9	42.8039								9	60.7255						7							9	42.9176						9	61.7137						9	72.2118
10	51.5255						10	43.1333								10	66.6627						8							10	41.451						10	59.2392						10	63.898
	Green							Green									Green							Green							Green							Green							Green
5	185.345	166.399					5	182.941	179.916							5	203.435	190.536					3		#DIV/0!					5	168.996	161.812					5	206.376	196.989					5	211.102	208.325
6	185.584						6	190.498								6	192.765						4							6	154.329						6	185.91						6	188.804
7	150.243						7	174.416								7	174.71						5							7	154.016						7	177.525						7	189.541
8	148.906						8	176.69								8	172.086						6							8	156.027						8	187.384						8	193.584
9	175.141						9	168.051								9	194.467						7							9	160.365						9	211.035						9	219.643
10	153.173						10	186.898								10	205.753						8							10	177.141						10	213.702						10	247.275
	Baseline1							Baseline2									Bleach0							Bleach2							Bleach5							Bleach10							Bleach20
cnt1	Red	AVG	AVG-Bg	AVG total	Norm B		cnt1	Red	AVG	AVG-Bg	AVG total	Norm B			Baseline T	cnt1	Red	AVG	AVG-Bg	AVG total	Norm B		cnt1	Red	AVG	AVG-Bg	AVG total	Norm B		cnt1	Red	AVG	AVG-Bg	AVG total	Norm B		cnt1	Red	AVG	AVG-Bg	AVG total	Norm B		cnt1	Red	AVG	AVG-Bg	AVG total	Norm B
7	534.135	522.273	451.279	601.277	1.03578		7	485.833	490.19	433.07	559.733	0.964218			580.505	7	532.428	537.483	459.115	523.64	0.902043		6		#DIV/0!	#DIV/0!	#DIV/0!	#DIV/0!		7	579.068	575.617	516.401	572.248	0.985776		7	629.633	585.274	521.239	619.087	1.06646		6	481.849	581.095	502.132	633.39	1.0911
8	618.129						8	581.852								8	611.331						7							8	673.215						8	663.161						7	680.421
9	414.556						9	402.884								9	468.691						8							9	474.569						9	463.029						8	581.016
	Green							Green									Green							Green							Green							Green							Green
7	311.042	318.753	171.902	209.308	1.03252		7	264.087	289.367	151.153	196.123	0.967478			202.715	7	282.016	308.828	153.65	186.241	0.918733		6		#DIV/0!	#DIV/0!	#DIV/0!	#DIV/0!		7	285.486	306.376	177.884	212.958	1.05053		7	346.907	355.706	199.779	219.26	1.08161		6	307.823	356.9	191.887	210.798	1.03987
8	343.383						8	303.36								8	320.637						7							8	310.595						8	374.495						7	367.74
9	301.836						9	300.653								9	323.83						8							9	323.048						9	345.717						8	395.138
cnt2	Red						cnt2	Red								cnt2	Red						cnt2	Red						cnt2	Red						cnt2	Red						cnt2	Red
6	367.041	431.326	360.332				6	349.812	407.237	350.117						6	328.904	402.348	323.98				4		#DIV/0!	#DIV/0!				6	363.072	415.618	356.402				6	417.549	475.033	410.997				6	434.113	456.94	377.977
7	489.348						7	455.761								7	447.932						5							7	463						7	534.154						7	513.915
8	437.59						8	416.137								8	430.208						6							8	420.782						8	473.396						8	422.792
	Green							Green									Green							Green							Green							Green							Green
6	350.683	365.603	218.751				6	317.055	329.931	191.717						6	301.28	315.247	160.069				4		#DIV/0!	#DIV/0!				6	323.502	330.787	202.295				6	379.601	383.253	227.326				6	374.478	375.746	210.733
7	371.805						7	357.997								7	329.631						5							7	348.642						7	398.812						7	386.536
8	374.321						8	314.741								8	314.829						6							8	320.218						8	371.345						8	366.225
cnt3	Red						cnt3	Red								cnt3	Red						cnt3	Red						cnt3	Red						cnt3	Red						cnt3	Red
6	641.348	612.283	541.289				6	589.655	588.009	530.889						5	546.785	587.687	509.319				4		#DIV/0!	#DIV/0!				5	685.567	692.877	633.661				8	758.597	804.597	740.561				5	598.969	648.511	569.548
7	616.14						7	595.526								6	645.512						5							6	715.379						9	870.696						6	703.519
8	579.362						8	578.846								7	570.765						6							7	677.686						10	784.498						7	643.044
	Green							Green									Green							Green							Green							Green							Green
6	453.679	423.885	277.033				6	414.782	394.303	256.089						5	461.747	442.423	287.246				4		#DIV/0!	#DIV/0!				5	467.669	435.104	306.611				8	398.758	408.172	252.245				5	489.993	452.132	287.119
7	413.778						7	409.573								6	461.502						5							6	442.222						9	413.116						6	461.867
8	404.198						8	358.553								7	404.02						6							7	395.42						10	412.642						7	404.536
cnt4	Red						cnt4	Red								cnt4	Red						cnt4	Red						cnt4	Red						cnt4	Red						cnt4	Red
7	541.2	532.378	461.383				6	350.541	510.841	453.721						6	326.451	402.101	323.732				5		#DIV/0!	#DIV/0!				6	419.514	531.411	472.195				6	479.114	562.88	498.844				6	457.639	561.855	482.892
8	590.463						7	572.514								7	448.714						6							7	582.349						7	634.776						7	626.482
9	465.471						8	609.467								8	431.137						7							8	592.369						8	574.749						8	601.443
	Green							Green									Green							Green							Green							Green							Green
7	406.4	363.892	217.04				6	383.11	376.046	237.832						6	427.843	380.962	225.785				5		#DIV/0!	#DIV/0!				6	434.443	411.183	282.69				6	467.49	420.133	264.206				6	452.741	391.767	226.754
8	372.569						7	402.82								7	395.698						6							7	421.933						7	425.69						7	397.98
9	312.706						8	342.208								8	319.345						7							8	377.173						8	367.22						8	324.58
cnt5	Red						cnt5	Red								cnt5	Red						cnt5	Red						cnt5	Red						cnt5	Red						cnt5	Red
9	987.42	946.877	875.883				9	969.918	909.009	851.89						8	800.086	975.712	897.344				5		#DIV/0!	#DIV/0!				9	948.937	917.882	858.666				8	796.376	985.541	921.505				8	865.067	1038.96	960
10	997.705						10	944.863								9	1092.64						6							10	996.851						9	1152.92						9	1163.43
11	855.507						11	812.247								10	1034.41						7							11	807.859						10	1007.33						10	1088.39
	Green							Green									Green							Green							Green							Green							Green
9	328.649	340.076	193.225				9	350.075	360.82	222.606						8	329.333	351.278	196.101				5		#DIV/0!	#DIV/0!				9	355.678	365.025	236.532				8	329.953	371.462	215.535				8	333.714	374.584	209.571
10	349.715						10	365.769								9	361.671						6							10	366.788						9	383.82						9	370.796
11	341.865						11	366.616								10	362.831						7							11	372.608						10	400.612						10	419.243
cnt6	Red						cnt6	Red								cnt6	Red						cnt6	Red						cnt6	Red						cnt6	Red						cnt6	Red
9	802.211	895.647	824.652				9	673.012	741.529	684.409						9	848.281	885.176	806.807				7		#DIV/0!	#DIV/0!				8	699.605	807.838	748.622				9	770.297	879.81	815.774				9	849.52	898.155	819.192
10	969.75						10	760.129								10	927.383						8							9	790.492						10	870.449						10	904.328
11	914.98						11	791.445								11	879.863						9							10	933.418						11	998.684						11	940.617
	Green							Green									Green							Green							Green							Green							Green
9	372.297	379.303	232.452				9	343.137	361.404	223.19						9	353.852	380.967	225.79				7		#DIV/0!	#DIV/0!				8	339.566	372.107	243.614				9	418.277	419.012	263.085				9	383.023	382.561	217.548
10	396.289						10	368.008								10	388.602						8							9	370.312						10	405.793						10	374.602
11	369.324						11	373.066								11	400.449						9							10	406.441						11	432.965						11	390.059
cnt7	Red						cnt7	Red								cnt7	Red						cnt7	Red						cnt7	Red						cnt7	Red						cnt7	Red
6	711.276	683.968	612.973				6	504.618	555.756	498.636						6	500.92	526.117	447.749				6		#DIV/0!	#DIV/0!				6	535.009	604.43	545.214				6	542.867	601.409	537.373				6	649.516	665.8	586.837
7	700.52						7	611.449								7	588.902						7							7	636.316						7	691.258						7	755.991
8	640.107						8	551.2								8	488.529						8							8	641.964						8	570.102						8	591.893
	Green							Green									Green							Green							Green							Green							Green
6	385.498	365.797	218.946				6	308.516	305.076	166.862						6	302.409	300.649	145.472				6		#DIV/0!	#DIV/0!				6	323.787	337.785	209.292				6	393.733	373.755	217.828				6	380.733	359.813	194.8
7	390.458						7	331.436								7	311.809						7							7	359.244						7	377.044						7	372.107
8	321.436						8	275.276								8	287.729						8							8	330.324						8	350.489						8	326.6
cnt8	Red						cnt8	Red								cnt8	Red						cnt8	Red						cnt8	Red						cnt8	Red						cnt8	Red
4	626.692	686.789	615.795				4	488.921	585.003	527.884						4	513.957	478.47	400.102				5		#DIV/0!	#DIV/0!				4	657.129	663.68	604.464				4	624.798	590.74	526.705				3	663.934	811.017	732.054
5	802.593						5	669.023								5	518.573						6							5	735.56						5	649.195						4	911.364
6	631.083						6	597.066								6	402.881						7							6	598.351						6	498.228						5	857.752
	Green							Green									Green							Green							Green							Green							Green
4	334.48	333.974	187.122				4	295.834	292.513	154.299						4	316.719	310.27	155.093				5		#DIV/0!	#DIV/0!				4	308.719	314.325	185.832				4	331.722	327.236	171.309				3	357.03	375.192	210.179
5	342.358						5	300.116								5	321.49						6							5	336.454						5	343.351						4	396.149
6	325.083						6	281.589								6	292.603						7							6	297.801						6	306.636						5	372.397
cnt9	Red						cnt9	Red								cnt9	Red						cnt9	Red						cnt9	Red						cnt9	Red						cnt9	Red
2	678.496	738.899	667.904				2	648.394	764.102	706.983						3	839.887	622.983	544.615				5		#DIV/0!	#DIV/0!				4	699.204	473.823	414.607				2	699.602	662.823	598.788				2	775.883	748.838	669.875
3	838.547						3	850.909								4	639.263						6							5	444.288						3	741.496						3	787.201
4	699.653						4	793.004								5	389.799						7							6	277.978						4	547.372						4	683.431
	Green							Green									Green							Green							Green							Green							Green
2	332.135	314.153	167.302				2	301.062	299.569	161.355						3	354.577	282.144	126.966				5		#DIV/0!	#DIV/0!				4	256.934	200.367	71.8745				2	363.5	317.952	162.025				2	344.818	313.604	148.59
3	331.723						3	319.208								4	279.759						6							5	200.314						3	328.591						3	314.905
4	278.602						4	278.438								5	212.095						7							6	143.854						4	261.766						4	281.088
cnt10	Red						cnt10	Red								cnt10	Red						cnt10	Red						cnt10	Red						cnt10	Red						cnt10	Red
	Green							Green									Green							Green							Green							Green							Green
[truncated: 34 more columns]

## Sheet: s5_20A
	Baseline1							Baseline2									Bleach0							Bleach2							Bleach5							Bleach10							Bleach20
Sp1	Red	AVG	AVG-Bg	Norm B	Norm CNT	Norm 0		Red	AVG	AVG-Bg	Norm B	Norm CNT	Norm 0		Baseline T		Red	AVG	AVG-Bg	Norm B	Norm CNT	Norm 0		Red	AVG	AVG-Bg	Norm B	Norm CNT	Norm 0		Red	AVG	AVG-Bg	Norm B	Norm CNT	Norm 0		Red	AVG	AVG-Bg	Norm B	Norm CNT	Norm 0		Red	AVG	AVG-Bg	Norm B	Norm CNT
6	637.861	724.956	700.478	1.02853	1.03142	1.08098	7	819.577	715.321	661.613	0.971467	0.968752	0.919469		681.046	7	819.577	715.321	662.909	0.973369	1.00512	1.0132	4		#DIV/0!	#DIV/0!	#DIV/0!	#DIV/0!	#DIV/0!	8	739.423	611.808	547.777	0.804318	0.790869	0.461032	7	538.253	710.413	654.466	0.960972	0.723337	0.286989	7	917.051	747.861	672.717	0.987771	0.997673
7	783.777						8	755.954								8	755.954						5							9	641.754						8	766.803						8	794.157
8	753.23						9	570.431								9	570.431						6							10	454.248						9	826.183						9	532.376
	Green							Green									Green							Green							Green							Green							Green
6	335.931	345.492	226.007	0.976457	0.914776	0.780361	7	337.181	341.81	236.905	1.02354	1.09755	1.2514		231.456	7	180.516	188.727	92.497	0.399631	0.611979	0	4		#DIV/0!	#DIV/0!	#DIV/0!	#DIV/0!	#DIV/0!	8	287.589	272.304	172.541	0.745459	0.883454	0.699641	7	289.017	320.397	190.533	0.823193	0.741139	0.332868	7	293.279	273.872	175.735	0.759258	0.982733
7	353.951						8	349.723								8	200.201						5							9	269.197						8	337.278						8	279
8	346.595						9	338.527								9	185.465						6							10	260.126						9	334.896						9	249.339
Sp2	Red							Red									Red							Red							Red							Red							Red
5	585.635	618.915	594.437	1.06196	1.06495	1.36888	6	635.324	578.777	525.07	0.938037	0.935416	0.63318		559.753	6	635.324	578.777	526.365	0.940351	0.971026	0.835435	5		#DIV/0!	#DIV/0!	#DIV/0!	#DIV/0!	#DIV/0!	7		#DIV/0!	#DIV/0!	#DIV/0!	#DIV/0!	#DIV/0!	150		#DIV/0!	#DIV/0!	#DIV/0!	#DIV/0!	#DIV/0!	5	315.067	359.687	284.543	0.508335	0.513432
6	651.225						7	633.013								7	633.013						6							8							180							6	421.213
7	619.886						8	467.994								8	467.994						7							9							210							7	342.781
	Green							Green									Green							Green							Green							Green							Green
5	337.432	351.293	231.808	1.1206	1.04982	1.28294	6	314.832	286.817	181.912	0.879397	0.94298	0.676142		206.86	6	189.705	207.529	111.299	0.538041	0.823935	0	5		#DIV/0!	#DIV/0!	#DIV/0!	#DIV/0!	#DIV/0!	7		#DIV/0!	#DIV/0!	#DIV/0!	#DIV/0!	#DIV/0!	150		#DIV/0!	#DIV/0!	#DIV/0!	#DIV/0!	#DIV/0!	5	195.419	198.174	100.036	0.483593	0.625931
6	361.759						7	287.841								7	220.07						6							8							180							6	211.076
7	354.689						8	257.778								8	212.813						7							9							210							7	188.025
Sp3	Red							Red									Red							Red							Red							Red							Red
7	326.975	454.728	430.25	0.939125	0.941765	0.863101	7	391.73	539.735	486.028	1.06087	1.05791	1.13613		458.139	8	657.438	521.924	469.512	1.02482	1.05825	1.13694	3		#DIV/0!	#DIV/0!	#DIV/0!	#DIV/0!	#DIV/0!	8	340	359.064	295.033	0.643982	0.633214	0.13776	9	364.556	384.596	328.649	0.717357	0.539964	-0.0814514	7	210.787	307.05	231.905	0.50619	0.511264
8	521.457						8	657.438								9	570.038						4							9	410.225						10	447.349						8	355.619
9	515.752						9	570.038								10	338.295						5							10	326.968						11	341.883						9	354.743
	Green							Green									Green							Green							Green							Green							Green
7	291.863	309.197	189.711	1.10065	1.03112	1.07317	7	242.59	259.919	155.014	0.899349	0.964375	0.916253		172.363	8	172.552	160.906	64.6757	0.37523	0.574612	0	3		#DIV/0!	#DIV/0!	#DIV/0!	#DIV/0!	#DIV/0!	8	142.13	147.066	47.3027	0.274437	0.325239	-0.586226	9	204.403	212.731	82.8675	0.480774	0.432851	-0.333253	7	137.933	146.633	48.4953	0.281356	0.364168
8	335.171						8	294.451								9	165.616						4							9	154.482						10	232.562						8	156.048
9	300.556						9	242.717								10	144.549						5							10	144.584						11	201.229						9	145.917
Sp4	Red							Red									Red							Red							Red							Red							Red
7	290.745	319.264	294.786	0.948686	0.951352	0.814106	7	379.409	380.383	326.676	1.05131	1.04838	1.18486		310.731	7	379.409	380.383	327.971	1.05548	1.08991	1.34358	3		#DIV/0!	#DIV/0!	#DIV/0!	#DIV/0!	#DIV/0!	7	447.467	490.01	425.979	1.37089	1.34797	2.32967	90		#DIV/0!	#DIV/0!	#DIV/0!	#DIV/0!	#DIV/0!	7	271.113	274.984	199.84	0.643127	0.649575
8	375.883						8	430.693								8	430.693						4							8	530.942						120							8	313.365
9	291.164						9	331.047								9	331.047						5							9	491.62						150							9	240.474
	Green							Green									Green							Green							Green							Green							Green
7	239.08	245.729	126.243	1.13992	1.06791	1.25951	7	210.734	200.157	95.252	0.860081	0.922268	0.702968		110.748	7	151.475	149.624	53.394	0.482123	0.738304	0	3		#DIV/0!	#DIV/0!	#DIV/0!	#DIV/0!	#DIV/0!	7	153.566	164.989	65.2261	0.588962	0.697987	-0.154057	90		#DIV/0!	#DIV/0!	#DIV/0!	#DIV/0!	#DIV/0!	7	142.562	148.622	50.4841	0.455848	0.59002
8	257.153						8	204.715								8	144.905						4							8	167.522						120							8	151.077
9	240.953						9	185.022								9	152.493						5							9	173.88						150							9	152.226
Sp5	Red							Red									Red							Red							Red							Red							Red
7	335.027	329.237	304.759	0.99375	0.996543	0.991128	7	380.557	362.299	308.592	1.00625	1.00344	1.00882		306.675	7	391.216	370.303	317.891	1.03657	1.07039	1.18063	4		#DIV/0!	#DIV/0!	#DIV/0!	#DIV/0!	#DIV/0!	7	357	333.071	269.04	0.877279	0.86261	0.647421	6	266.413	282.103	226.156	0.737445	0.555084	-0.141774	5	249.232	280.867	205.723	0.670815	0.67754
8	374.604						8	397.743								8	403.872						5							8	377.459						7	298.62						6	303.899
9	278.079						9	308.598								9	315.822						6							9	264.754						8	281.276						7	289.47
	Green							Green									Green							Green							Green							Green							Green
7	365.407	360.616	241.13	1.05311	0.986582	0.965567	7	348.451	321.716	216.811	0.946895	1.01536	1.03941		228.971	7	168.164	187.487	91.2571	0.398554	0.610329	0	4		#DIV/0!	#DIV/0!	#DIV/0!	#DIV/0!	#DIV/0!	7	188.156	194.494	94.7316	0.413728	0.490315	-0.307989	6	219.418	218.475	88.6115	0.386999	0.348424	-0.67212	5	195.967	185.74	87.6029	0.382594	0.495205
8	364.355						8	330.145								8	196.956						5							8	199.377						7	211.156						6	182.787
9	352.085						9	286.552								9	197.341						6							9	195.951						8	224.852						7	178.467
Sp6	Red							Red									Red							Red							Red							Red							Red
9	480.909	610.049	585.571	1.2912	1.29483	1.49683	8	263.621	375.155	321.448	0.708801	0.70682	0.505948		453.509	8	263.621	375.155	322.743	0.711658	0.734872	0.553218	5		#DIV/0!	#DIV/0!	#DIV/0!	#DIV/0!	#DIV/0!	8	222.833	314.294	250.263	0.551836	0.542608	0.229225	9	552.155	605.888	549.941	1.21263	0.912766	0.852998	9	371.061	396.668	321.523	0.708967	0.716075
10	698.849						9	406.297								9	406.297						6							9	347.709						10	689.988						10	429.845
11	650.388						10	455.548								10	455.548						7							10	372.339						11	575.521						11	389.097
	Green							Green									Green							Green							Green							Green							Green
9	375.218	388.684	269.198	1.11068	1.04052	1.06829	8	306.406	320.45	215.545	0.889317	0.953617	0.921838		242.372	8	167.312	160.581	64.3507	0.265504	0.406582	0	5		#DIV/0!	#DIV/0!	#DIV/0!	#DIV/0!	#DIV/0!	8	202.87	220.76	120.997	0.499219	0.591632	0.311838	9	259.188	279.928	150.065	0.61915	0.557434	0.254208	9	185.427	198.237	100.1	0.413001	0.534561
10	395.294						9	313.812								9	163.221						6							9	230.397						10	282.052						10	203.961
11	395.539						10	341.133								10	151.209						7							10	229.012						11	298.545						11	205.324
Sp7	Red							Red									Red							Red							Red							Red							Red
6		#DIV/0!	#DIV/0!	#DIV/0!	#DIV/0!	#DIV/0!	6		#DIV/0!	#DIV/0!	#DIV/0!	#DIV/0!	#DIV/0!		#DIV/0!	7		#DIV/0!	#DIV/0!	#DIV/0!	#DIV/0!	#DIV/0!	4		#DIV/0!	#DIV/0!	#DIV/0!	#DIV/0!	#DIV/0!	4		#DIV/0!	#DIV/0!	#DIV/0!	#DIV/0!	#DIV/0!	120		#DIV/0!	#DIV/0!	#DIV/0!	#DIV/0!	#DIV/0!	4		#DIV/0!	#DIV/0!	#DIV/0!	#DIV/0!
7							7									8							5							5							150							5
8							8									9							6							6							180							6
	Green							Green									Green							Green							Green							Green							Green
6		#DIV/0!	#DIV/0!	#DIV/0!	#DIV/0!	#DIV/0!	6		#DIV/0!	#DIV/0!	#DIV/0!	#DIV/0!	#DIV/0!		#DIV/0!	7		#DIV/0!	#DIV/0!	#DIV/0!	#DIV/0!	#DIV/0!	4		#DIV/0!	#DIV/0!	#DIV/0!	#DIV/0!	#DIV/0!	4		#DIV/0!	#DIV/0!	#DIV/0!	#DIV/0!	#DIV/0!	120		#DIV/0!	#DIV/0!	#DIV/0!	#DIV/0!	#DIV/0!	4		#DIV/0!	#DIV/0!	#DIV/0!	#DIV/0!
7							7									8							5							5							150							5
8							8									9							6							6							180							6
Sp8	Red							Red									Red							Red							Red							Red							Red
5		#DIV/0!	#DIV/0!	#DIV/0!	#DIV/0!	#DIV/0!	5		#DIV/0!	#DIV/0!	#DIV/0!	#DIV/0!	#DIV/0!		#DIV/0!	3		#DIV/0!	#DIV/0!	#DIV/0!	#DIV/0!	#DIV/0!	3		#DIV/0!	#DIV/0!	#DIV/0!	#DIV/0!	#DIV/0!	2		#DIV/0!	#DIV/0!	#DIV/0!	#DIV/0!	#DIV/0!	90		#DIV/0!	#DIV/0!	#DIV/0!	#DIV/0!	#DIV/0!	3		#DIV/0!	#DIV/0!	#DIV/0!	#DIV/0!
6							6									4							4							3							120							4
7							7									5							5							4							150							5
	Green							Green									Green							Green							Green							Green							Green
5		#DIV/0!	#DIV/0!	#DIV/0!	#DIV/0!	#DIV/0!	5		#DIV/0!	#DIV/0!	#DIV/0!	#DIV/0!	#DIV/0!		#DIV/0!	3		#DIV/0!	#DIV/0!	#DIV/0!	#DIV/0!	#DIV/0!	3		#DIV/0!	#DIV/0!	#DIV/0!	#DIV/0!	#DIV/0!	2		#DIV/0!	#DIV/0!	#DIV/0!	#DIV/0!	#DIV/0!	90		#DIV/0!	#DIV/0!	#DIV/0!	#DIV/0!	#DIV/0!	3		#DIV/0!	#DIV/0!	#DIV/0!	#DIV/0!
6							6									4							4							3							120							4
7							7									5							5							4							150							5
Sp9	Red							Red									Red							Red							Red							Red							Red
5		#DIV/0!	#DIV/0!	#DIV/0!	#DIV/0!	#DIV/0!	5		#DIV/0!	#DIV/0!	#DIV/0!	#DIV/0!	#DIV/0!		#DIV/0!	3		#DIV/0!	#DIV/0!	#DIV/0!	#DIV/0!	#DIV/0!	3		#DIV/0!	#DIV/0!	#DIV/0!	#DIV/0!	#DIV/0!	2		#DIV/0!	#DIV/0!	#DIV/0!	#DIV/0!	#DIV/0!	60		#DIV/0!	#DIV/0!	#DIV/0!	#DIV/0!	#DIV/0!	2		#DIV/0!	#DIV/0!	#DIV/0!	#DIV/0!
6							6									4							4							3							90							3
7							7									5							5							4							120							4
	Green							Green									Green							Green							Green							Green							Green
5		#DIV/0!	#DIV/0!	#DIV/0!	#DIV/0!	#DIV/0!	5		#DIV/0!	#DIV/0!	#DIV/0!	#DIV/0!	#DIV/0!		#DIV/0!	3		#DIV/0!	#DIV/0!	#DIV/0!	#DIV/0!	#DIV/0!	3		#DIV/0!	#DIV/0!	#DIV/0!	#DIV/0!	#DIV/0!	2		#DIV/0!	#DIV/0!	#DIV/0!	#DIV/0!	#DIV/0!	60		#DIV/0!	#DIV/0!	#DIV/0!	#DIV/0!	#DIV/0!	2		#DIV/0!	#DIV/0!	#DIV/0!	#DIV/0!
6							6									4							4							3							90							3
7							7									5							5							4							120							4
Sp10	Red							Red									Red							Red							Red							Red							Red
															#DIV/0!
	Green							Green									Green							Green							Green							Green							Green
															#DIV/0!
		AVG RED	#DIV/0!	AVG GRN	#DIV/0!				AVG RED	#DIV/0!	AVG GRN	#DIV/0!						AVG RED	#DIV/0!	AVG GRN	#DIV/0!				AVG RED	#DIV/0!	AVG GRN	#DIV/0!				AVG RED	#DIV/0!	AVG GRN	#DIV/0!				AVG RED	#DIV/0!	AVG GRN	#DIV/0!				AVG RED	#DIV/0!	AVG GRN	#DIV/0!
		AVG RED0	#DIV/0!	AVG GRN0	#DIV/0!				AVG RED0	#DIV/0!	AVG GRN0	#DIV/0!						AVG RED0	#DIV/0!	AVG GRN0	#DIV/0!				AVG RED0	#DIV/0!	AVG GRN0	#DIV/0!				AVG RED0	#DIV/0!	AVG GRN0	#DIV/0!				AVG RED0	#DIV/0!	AVG GRN0	#DIV/0!				AVG RED0	#DIV/0!	AVG GRN0	#DIV/0!
bg1	Red	AVG	AVG Total				bg1	Red	AVG	AVG Total						bg1	Red	AVG	AVG Total				bg1	Red	AVG	AVG Total				bg1	Red	AVG	AVG Total				bg1	Red	AVG	AVG Total				bg1	Red	AVG	AVG Total
5	39.6424	27.3189	24.478				5	55.9201	50.9676	53.7074						5	55.9201	50.9676	52.412				3		#DIV/0!	#DIV/0!				5	73.6979	65.6117	64.0311				5	63.6944	58.6117	55.947				5	87.2049	77.7153	75.1445
6	34.2917						6	54.7743								6	54.7743						4							6	68.6701						6	65.5729						6	82.4618
7	24.4653						7	54.3368								7	54.3368						5							7	64.2396						7	56.6076						7	80.1181
8	25.7917						8	46.7847								8	46.7847						6							8	64.5625						8	49.2014						8	74.2292
9	22.5417						9	49.5312								9	49.5312						7							9	61.309						9	57.9653						9	73.5903
10	17.1806						10	44.4583								10	44.4583						8							10	61.191						10	58.6285						10	68.6875
	Green							Green									Green							Green							Green							Green							Green
5	124.451	126.834	119.485				5	110.483	109.518	104.905						5	105.358	103.541	96.2301				3		#DIV/0!	#DIV/0!				5	105.889	107.269	99.7629				5	118.184	124.988	129.864				5	101.062	91.6505	98.1375
6	124.312						6	113.469								6	101.17						4							6	113.319						6	136.135						6	87.1181
7	117.621						7	114.962								7	104.181						5							7	99.2049						7	136.413						7	89.3264
8	127.309						8	98.6701								8	95.7396						6							8	101.257						8	112.316						8	103.694
9	134.007						9	102.108								9	99.1806						7							9	117.194						9	127.028						9	85.625
10	133.306						10	117.417								10	115.618						8							10	106.75						10	119.851						10	83.0764
bg2	Red						bg2	Red								bg2	Red						bg2	Red						bg2	Red						bg2	Red						bg2	Red
5	22.8472	23.6991					5	49.3611	45.5168							5	49.3611	45.5168					3		#DIV/0!					5	58.3924	60.8767					5	52.1146	56.0706					5	78.2292	74.0642
6	20.5729						6	44.2465								6	44.2465						4							6	56.2361						6	53.7882						6	73.9618
7	28.1806						7	40.1806								7	40.1806						5							7	62.3125						7	56.8646						7	70.9965
8	26.441						8	44.6389								8	44.6389						6							8	60.5764						8	57.1493						8	71.1076
9	22.9028						9	48.1875								9	48.1875						7							9	64.7431						9	61.0382						9	75.6076
10	21.25						10	46.4861								10	46.4861						8							10	63						10	55.4688						10	74.4826
	Green							Green									Green							Green							Green							Green							Green
5	127.955	118.446					5	95.9618	95.9502							5	78.75	75.4033					3		#DIV/0!					5	78.75	87.3802					5	126.264	133.485					5	103.722	101.153
6	115.083						6	88.3785								6	69.6146						4							6	87.9757						6	129.806						6	102.826
7	101.108						7	104.746								7	72.0694						5							7	91.6562						7	126.181						7	102.24
8	108.677						8	99.559								8	71.4236						6							8	82.7257						8	147.121						8	96.3229
9	133.639						9	94.4826								9	74.3681						7							9	96.9583						9	140.656						9	104.583
10	124.215						10	92.5729								10	86.1944						8							10	86.2153						10	130.882						10	97.2222
bg3	Red						bg3	Red								bg3	Red						bg3	Red						bg3	Red						bg3	Red						bg3	Red
5	20.7604	22.4161					5	83.5208	64.6377							5	82.1562	60.7517					3		#DIV/0!					5	85.8264	65.6047					5	45.9201	53.1586					5	77.0278	73.6539
6	16.2847						6	74.4583								6	74.5556						4							6	79.8715						6	48.9306						6	73.9132
7	20.0903						7	74.4306								7	64.6319						5							7	66.0139						7	47.5625						7	74.5069
8	26.3646						8	59.8021								8	52.7812						6							8	56.3194						8	51.1979						8	74.7465
9	23.1979						9	46.5521								9	47.4549						7							9	54.5						9	61.3681						9	72.9097
10	27.7986						10	49.0625								10	42.9306						8							10	51.0972						10	63.9722						10	68.8194
	Green							Green									Green							Green							Green							Green							Green
5	92.108	113.175					5	116.278	109.247							5	135.375	109.746					3		#DIV/0!					5	124.833	104.639					5	126.431	131.119					5	99.6597	101.609
6	111.01						6	120.806								6	129.771						4							6	114.062						6	121.167						6	95.4097
7	106.073						7	100.229								7	108.569						5							7	103.635						7	114.892						7	100.01
8	113.653						8	113.653								8	95.4028						6							8	96.6528						8	132.379						8	104.045
9	122.247						9	105.056								9	104.104						7							9	91.2118						9	149.406						9	108.229
10	133.962						10	99.4583								10	85.2535						8							10	97.441						10	142.438						10	102.302
	Baseline1							Baseline2									Bleach0							Bleach2							Bleach5							Bleach10							Bleach15
cnt1	Red	AVG	AVG-Bg	AVG total	Norm B		cnt1	Red	AVG	AVG-Bg	AVG total	Norm B			Baseline T	cnt1	Red	AVG	AVG-Bg	AVG total	Norm B		cnt1	Red	AVG	AVG-Bg	AVG total	Norm B		cnt1	Red	AVG	AVG-Bg	AVG total	Norm B		cnt1	Red	AVG	AVG-Bg	AVG total	Norm B		cnt1	Red	AVG	AVG-Bg	AVG total	Norm B
7	190.388	233.589	209.111	361.831	0.997198		7	238.782	234.465	180.758	363.865	1.0028			362.848	7	238.782	234.465	182.053	351.386	0.96841		6		#DIV/0!	#DIV/0!	#DIV/0!	#DIV/0!		8	279.652	276.365	212.334	369.019	1.01701		8	351.267	317.799	261.852	482.054	1.32853		7	340.085	333.097	257.953	359.247	0.990074
8	283.024						8	263.152								8	263.152						7							9	312.17						9	343.03						8	382.218
9	227.355						9	201.461								9	201.461						8							10	237.273						10	259.1						9	276.988
	Green							Green									Green							Green							Green							Green							Green
7	210.521	218.511	99.0257	212.409	1.06743		7	198.091	192.628	87.7234	185.574	0.932572			198.991	7	147.991	139.94	43.7103	129.944	0.653014		6		#DIV/0!	#DIV/0!	#DIV/0!	#DIV/0!		8	190.109	179.319	79.5563	167.909	0.8438		8	238.188	228.999	99.1352	221.022	1.11071		7	180.542	174.013	75.8755	153.74	0.772598
8	213.267						8	205.642								8	138.167						7							9	176.388						9	233.815						8	174.703
9	231.745						9	174.151								9	133.664						8							10	171.461						10	214.994						9	166.794
cnt2	Red						cnt2	Red								cnt2	Red						cnt2	Red						cnt2	Red						cnt2	Red						cnt2	Red
8	684.15	720.134	695.656				8	746.933	776.468	722.76						7	403.064	657.905	605.493				4		#DIV/0!	#DIV/0!				7	496.609	737.812	673.781				9	1104.19	1082.66	1026.71				7	515.157	583.361	508.216
9	790.388						9	823.719								8	746.933						5							8	784.026						10	1179.03						8	666.545
10	685.865						10	758.751								9	823.719						6							9	932.8						11	964.749						9	568.38
	Green							Green									Green							Green							Green							Green							Green
8	363.946	402.93	283.445				8	326.732	354.206	249.301						7	188.839	231.338	135.108				4		#DIV/0!	#DIV/0!				7	224.938	276.73	176.967				9	451.105	490.511	360.647				7	251.59	271.323	173.185
9	411.605						9	364.161								8	218.073						5							8	282.545						10	521.253						8	283.3
10	433.24						10	371.725								9	287.103						6							9	322.708						11	499.174						9	279.079
cnt3	Red						cnt3	Red								cnt3	Red						cnt3	Red						cnt3	Red						cnt3	Red						cnt3	Red
7	188.97	246.416	221.938				8	303.811	262.635	208.928						7	210.113	266.405	213.993				4		#DIV/0!	#DIV/0!				7	199.229	245.692	181.661				8	292.963	285.047	229.1				7	267.78	250.666	175.521
8	277.927						9	285.29								8	303.811						5							8	268.216						9	312.485						8	267.162
9	272.351						10	198.805								9	285.29						6							9	269.631						10	249.692						9	217.055
	Green							Green									Green							Green							Green							Green							Green
7	296.393	316.453	196.968				8	272.378	282.328	177.423						7	241.588	242.666	146.435				4		#DIV/0!	#DIV/0!				7	224.817	231.735	131.972				8	331.409	327.19	197.326				7	219.207	225.042	126.904
8	337.668						9	292.061								8	245.076						5							8	243.28						9	322.954						8	229.518
9	315.299						10	282.546								9	241.332						6							9	227.107						10	327.207						9	226.399
cnt4	Red						cnt4	Red								cnt4	Red						cnt4	Red						cnt4	Red						cnt4	Red						cnt4	Red
8	241.265	312.726	288.248				8	245.165	331.706	277.999						8	245.165	331.706	279.294				5		#DIV/0!	#DIV/0!				9	341.326	311.925	247.894				9	384.668	374.563	318.616				7	279.671	337.479	262.334
9	354.921						9	378.021								9	378.021						6							10	341.823						10	418.146						8	376.689
10	341.991						10	371.933								10	371.933						7							11	252.625						11	320.875						9	356.076
	Green							Green									Green							Green							Green							Green							Green
8	302.68	304.018	184.533				8	247.869	278.769	173.864						8	155.549	178.032	81.8015				5		#DIV/0!	#DIV/0!				9	251.628	252.696	152.933				9	266.774	280.093	150.23				7	234.168	231.439	133.301
9	306.665						9	298.479								9	184.305						6							10	268.128						10	309.643						8	247.152
10	302.71						10	289.96								10	194.241						7							11	238.332						11	263.863						9	212.997
cnt5	Red						cnt5	Red								cnt5	Red						cnt5	Red						cnt5	Red						cnt5	Red						cnt5	Red
9	580.634	510.238	485.76				8	471.146	570.829	517.122						8	495.466	598.247	545.835				5		#DIV/0!	#DIV/0!				8	593.884	668.77	604.739				9	785.482	770.85	714.903				8	763.341	672.617	597.472
10	576.531						9	650.302								9	671.162						6							9	752.863						10	872.872						9	725.985
11	373.549						10	591.04								10	628.113						7							10	659.564						11	654.195						10	528.524
	Green							Green									Green							Green							Green							Green							Green
9	463.735	454.151	334.666				8	294.771	366.136	261.231						8	248.165	295.759	199.529				5		#DIV/0!	#DIV/0!				8	326.564	345.984	246.221				9	402.759	426.707	296.844				8	328.216	316.502	218.364
10	489.768						9	407.326								9	318.799						6							9	348.372						10	458.924						9	333.448
11	408.951						10	396.311								10	320.314						7							10	363.015						11	418.439						10	287.841
cnt6	Red						cnt6	Red								cnt6	Red						cnt6	Red						cnt6	Red						cnt6	Red						cnt6	Red
8	156.08	171.604	147.126				8	204.521	204.421	150.714						8	204.521	204.421	152.009				7		#DIV/0!	#DIV/0!				8	256.076	270.105	206.074				8	244.021	288.514	232.567				7	247.646	289.117	213.973
9	212.872						9	219.076								9	219.076						8							9	295.417						9	321.521						8	313.75
10	145.861						10	189.667								10	189.667						9							10	258.823						10	300						9	305.955
	Green							Green									Green							Green							Green							Green							Green
8	237.705	242.537	123.052				8	195.059	206.433	101.528						8	187.754	201.797	105.567				7		#DIV/0!	#DIV/0!				8	194.264	207.451	107.688				8	241.75	240.994	111.13				7	193.389	199.985	101.847
9	255.611						9	208.566								9	210.115						8							9	209.295						9	240.49						8	204.24
10	234.295						10	215.674								10	207.524						9							10	218.795						10	240.743						9	202.326
cnt7	Red						cnt7	Red								cnt7	Red						cnt7	Red						cnt7	Red						cnt7	Red						cnt7	Red
10	508.934	619.926	595.448				11	733.837	645.205	591.497						11	691	608.61	556.198				6		#DIV/0!	#DIV/0!				10	528.236	627.602	563.571				11	932.212	798.511	742.564				9	507.069	596.517	521.373
11	729.594						12	707.062								12	669.257						7							11	713.667						12	886.108						10	679.66
12	621.25						13	494.715								13	465.573						8							12	640.903						13	577.212						11	602.823
	Green							Green									Green							Green							Green							Green							Green
10	321.17	362.969	243.483				11	338.444	328.885	223.98						11	211.774	233.972	137.742				6		#DIV/0!	#DIV/0!				10	244.816	290.779	191.016				11	384.281	399.179	269.316				9	240.226	264.782	166.645
11	392.17						12	352.701								12	234.743						7							11	333.632						12	426.583						10	274.458
12	375.566						13	295.51								13	255.399						8							12	293.889						13	386.674						11	279.663
cnt8	Red						cnt8	Red								cnt8	Red						cnt8	Red						cnt8	Red						cnt8	Red						cnt8	Red
12	400.448	440.152	415.674				12	381.417	458.531	404.824						12	381.417	458.531	406.119				5		#DIV/0!	#DIV/0!				12	453.611	490.276	426.245				12	543.608	614.584	558.637				11	455.514	558.377	483.233
13	523.542						13	557.351								13	557.351						6							13	568.253						13	706.587						12	635.962
14	396.465						14	436.826								14	436.826						7							14	448.965						14	593.556						13	583.656
	Green							Green									Green							Green							Green							Green							Green
12	452.802	430.539	311.054				12	376.948	387.342	282.437						12	296.167	326.893	230.663				5		#DIV/0!	#DIV/0!				12	367.118	382.714	282.951				12	483.611	493.579	363.715				11	340.875	379.075	280.938
13	457.903						13	420.483								13	334.365						6							13	406.497						13	518.733						12	404.438
14	380.913						14	364.594								14	350.146						7							14	374.528						14	478.392						13	391.913
cnt9	Red						cnt9	Red								cnt9	Red						cnt9	Red						cnt9	Red						cnt9	Red						cnt9	Red
10	177.649	221.999	197.521				10	272.542	273.89	220.183						10	272.542	273.89	221.478				5		#DIV/0!	#DIV/0!				10	236.552	268.899	204.868				10	265.948	309.483	253.536				9	257.521	288.289	213.145
11	264.146						11	301.625								11	301.625						6							11	275.649						11	331.139						10	309.903
12	224.201						12	247.503								12	247.503						7							12	294.497						12	331.361						11	297.444
	Green							Green									Green							Green							Green							Green							Green
10	266.26	254.938	135.452				10	230.931	217.58	112.675						10	172.76	185.17	88.94				5		#DIV/0!	#DIV/0!				10	241.826	241.637	141.874				10	273.562	270.723	140.86				9	194.069	204.738	106.601
11	265.833						11	221.257								11	189.101						6							11	245.691						11	274.712						10	215.274
12	232.719						12	200.552								12	193.649						7							12	237.392						12	263.896						11	204.871
cnt10	Red						cnt10	Red								cnt10	Red						cnt10	Red						cnt10	Red						cnt10	Red						cnt10	Red
	Green							Green									Green							Green							Green							Green							Green
[truncated: 34 more columns]

## Sheet: s6_20A
	Baseline1							Baseline2									Bleach0							Bleach2							Bleach5							Bleach10							Bleach20
Sp1	Red	AVG	AVG-Bg	Norm B	Norm CNT	Norm 0		Red	AVG	AVG-Bg	Norm B	Norm CNT	Norm 0		Baseline T		Red	AVG	AVG-Bg	Norm B	Norm CNT	Norm 0		Red	AVG	AVG-Bg	Norm B	Norm CNT	Norm 0		Red	AVG	AVG-Bg	Norm B	Norm CNT	Norm 0		Red	AVG	AVG-Bg	Norm B	Norm CNT	Norm 0		Red	AVG	AVG-Bg	Norm B	Norm CNT
8	216.155	247.286	229.464	0.986468	0.956822	0.915726	9	318.161	292.14	235.759	1.01353	1.04594	1.08966		232.612	8	262.194	260.406	224.278	0.964172	0.869435	0.745166	4		#DIV/0!	#DIV/0!	#DIV/0!	#DIV/0!	#DIV/0!	8	343.921	340.174	250.747	1.07796	0.895247	0.795545	8	468.345	498.509	466.964	2.00748	1.78123	2.52479	8	258.133	278.405	249.964	1.0746	0.993425
9	290.673						10	318.282								9	290.188						5							9	370.585						9	527.533						9	289.136
10	235.03						11	239.976								10	228.836						6							10	306.015						10	499.648						10	287.945
	Green							Green									Green							Green							Green							Green							Green
8	355.07	378.272	248.926	0.993172	0.976597	0.954322	9	386.764	408.451	252.348	1.00683	1.02421	1.04726		250.637	8	285.242	279.999	140.018	0.558649	0.487646	0	4		#DIV/0!	#DIV/0!	#DIV/0!	#DIV/0!	#DIV/0!	8	250.982	262.46	137.072	0.546892	0.537104	0.0965293	8	325.827	361.763	213.183	0.850564	0.760721	0.53298	8	217.318	231.288	91.5703	0.36535	0.391524
9	386.2						10	413.712								9	291.088						5							9	262.667						9	364.215						9	223.342
10	393.545						11	424.876								10	263.667						6							10	273.73						10	395.248						10	253.203
Sp2	Red							Red									Red							Red							Red							Red							Red
7	124.992	135.776	117.954	1.11228	1.07886	1.34006	7	146.378	150.52	94.1392	0.887715	0.9161	0.638188		106.047	7	138.286	131.112	94.9836	0.895677	0.807671	0.170591	5		#DIV/0!	#DIV/0!	#DIV/0!	#DIV/0!	#DIV/0!	6	180.887	191.557	102.131	0.963074	0.799831	0.136783	6	116.017	106.863	75.318	0.710235	0.630188	-0.594789	6	154.16	180.521	152.081	1.43409	1.32576
8	160.723						8	165.706								8	146.592						6							7	206.135						7	113.979						7	201.933
9	121.613						9	139.475								9	108.458						7							8	187.651						8	90.5924						8	185.471
	Green							Green									Green							Green							Green							Green							Green
7	313.265	326.776	197.43	1.1213	1.10259	1.4424	7	317.546	310.817	154.714	0.878698	0.89387	0.542319		176.072	7	314.063	294.916	154.935	0.879952	0.768113	0	5		#DIV/0!	#DIV/0!	#DIV/0!	#DIV/0!	#DIV/0!	6	274.046	292.227	166.839	0.947558	0.930598	0.700708	6	280.37	268.727	120.146	0.682369	0.610292	-0.680594	6	268.529	277.09	137.372	0.780204	0.836099
8	365.685						8	315.618								8	313.748						6							7	299.185						7	276.718						7	289.849
9	301.378						9	299.286								9	256.937						7							8	303.45						8	249.092						8	272.891
Sp3	Red							Red									Red							Red							Red							Red							Red
7	196.211	188.978	171.156	0.97185	0.942643	0.905866	7	252.548	237.452	181.071	1.02815	1.06103	1.10015		176.114	7	160.301	193.6	157.472	0.894149	0.806293	0.682091	3		#DIV/0!	#DIV/0!	#DIV/0!	#DIV/0!	#DIV/0!	8	184.819	203.114	113.688	0.645536	0.536116	0.238683	9	215.355	187.431	155.887	0.885148	0.785388	0.647783	8	138.651	126.311	97.8708	0.555725	0.513746
8	197.566						8	249.277								8	214.699						4							9	225.657						10	197.831						9	135
9	173.157						9	210.53								9	205.801						5							10	198.867						11	149.108						10	105.283
	Green							Green									Green							Green							Green							Green							Green
7	361.428	347.639	218.293	0.986063	0.969606	0.950117	7	390.584	380.566	224.464	1.01394	1.03144	1.05161		221.378	7	264.753	239.062	99.0815	0.447566	0.390682	0	3		#DIV/0!	#DIV/0!	#DIV/0!	#DIV/0!	#DIV/0!	8	217.024	221.221	95.8329	0.432892	0.425144	0.0565574	9	231.193	230.643	82.0622	0.370688	0.331533	-0.0970747	8	199.729	196.066	56.349	0.254537	0.272772
8	331.916						8	391.072								8	241.741						4							9	223.705						10	230.386						9	176.41
9	349.572						9	360.042								9	210.693						5							10	222.934						11	230.349						10	212.06
Sp4	Red							Red									Red							Red							Red							Red							Red
7	193.417	210.195	192.373	0.937355	0.909184	0.779654	7	247.544	274.466	218.086	1.06265	1.09662	1.23444		205.229	8	306.375	276.66	240.532	1.17202	1.05686	1.13795	3		#DIV/0!	#DIV/0!	#DIV/0!	#DIV/0!	#DIV/0!	8	392.606	367.229	277.802	1.35362	1.12418	1.30129	7	326.242	283.415	251.871	1.22726	1.08895	1.21581	7	289.545	267.562	239.121	1.16514	1.07713
8	241.462						8	299.478								9	322.523						4							9	391.072						8	294.14						8	295.413
9	195.705						9	276.377								10	201.083						5							10	318.008						9	229.864						9	217.727
	Green							Green									Green							Green							Green							Green							Green
7	357.424	342.309	212.964	1.02486	1.00775	1.01881	7	337.152	358.735	202.633	0.975142	0.991979	0.980539		207.798	8	289.731	279.921	139.94	0.673441	0.587849	0	3		#DIV/0!	#DIV/0!	#DIV/0!	#DIV/0!	#DIV/0!	8	297.591	288.787	163.398	0.786333	0.772258	0.447431	7	323.349	304.927	156.346	0.752395	0.672921	0.20641	7	305.481	289.029	149.312	0.718542	0.770019
8	340.212						8	356.534								9	281.402						4							9	301.182						8	323.159						8	301.651
9	329.292						9	382.519								10	268.629						5							10	267.587						9	268.273						9	259.955
Sp5	Red							Red									Red							Red							Red							Red							Red
6	175.459	229.06	211.238	1.06655	1.0345	1.07275	7	271.053	241.256	184.876	0.933447	0.963295	0.922603		198.057	6	134.066	153.655	117.527	0.593397	0.535092	0.0196896	4		#DIV/0!	#DIV/0!	#DIV/0!	#DIV/0!	#DIV/0!	6	271.148	258.721	169.294	0.854773	0.709887	0.388266	6	211.137	205.047	173.503	0.876023	0.777292	0.530395	6	223.189	225.959	197.519	0.997281	0.921947
7	276.534						8	267.097								7	175.776						5							7	272.044						7	232.426						7	261.934
8	235.188						9	185.619								8	151.123						6							8	232.97						8	171.579						8	192.754
	Green							Green									Green							Green							Green							Green							Green
6	331.881	373.978	244.632	1.00295	0.986211	0.970923	7	395.709	399.296	243.193	0.99705	1.01427	1.03008		243.913	6	286.372	286.891	146.91	0.602305	0.525754	0	4		#DIV/0!	#DIV/0!	#DIV/0!	#DIV/0!	#DIV/0!	6	290.451	291.031	165.643	0.679107	0.666951	0.297731	6	311.907	325.569	176.989	0.725623	0.648977	0.25983	6	298.325	302.057	162.34	0.665566	0.713248
7	403.909						8	407.906								7	298.172						5							7	298.391						7	348.986						7	325.418
8	386.144						9	394.272								8	276.128						6							8	284.251						8	315.814						8	282.429
Sp6	Red							Red									Red							Red							Red							Red							Red
7	180.923	241.522	223.7	0.935148	0.907043	0.848244	8	301.318	311.108	254.728	1.06485	1.0989	1.16146		239.214	7	191.338	204.897	168.769	0.705514	0.636192	0.406068	5		#DIV/0!	#DIV/0!	#DIV/0!	#DIV/0!	#DIV/0!	7	348.169	313.808	224.381	0.937994	0.779002	0.639211	7	276.464	269.88	238.335	0.996325	0.884036	0.810683	7	233.722	246.757	218.317	0.912643	0.843703
8	261.167						9	341.185								8	215.619						6							8	329.977						8	301.291						8	276.189
9	282.477						10	290.821								9	207.735						7							9	263.278						9	231.884						9	230.361
	Green							Green									Green							Green							Green							Green							Green
7	478.093	484.469	355.123	1.02944	1.01226	1.02002	8	506.348	490.913	334.81	0.970558	0.987316	0.979293		344.967	7	286.225	293.103	153.122	0.443874	0.387459	0	5		#DIV/0!	#DIV/0!	#DIV/0!	#DIV/0!	#DIV/0!	7	267.424	276.45	151.062	0.437904	0.430066	0.0695569	7	353.129	318.532	169.952	0.492661	0.440622	0.0867906	7	293.318	277.313	137.595	0.398865	0.427441
8	493.517						9	488.907								8	294.695						6							8	284.192						8	314.109						8	287.848
9	481.797						10	477.483								9	298.387						7							9	277.735						9	288.358						9	250.772
Sp7	Red							Red									Red							Red							Red							Red							Red
9	253.92	269.274	251.452	0.964179	0.935203	0.777737	9	290.442	326.516	270.135	1.03582	1.06894	1.23648		260.793	9	562.931	500.777	464.649	1.78167	1.60661	3.08075	4		#DIV/0!	#DIV/0!	#DIV/0!	#DIV/0!	#DIV/0!	8	757.737	739.033	649.606	2.49088	2.06867	4.66568	8	442.989	519.596	488.051	1.87141	1.66049	3.26558	9	421.639	384.295	355.854	1.36451	1.26143
10	317.956						10	369.62								10	563.85						5							9	820.387						9	577.945						10	419.785
11	235.945						11	319.485								11	375.551						6							10	638.974						10	537.854						11	311.46
	Green							Green									Green							Green							Green							Green							Green
9	329.339	339.714	210.368	0.994993	0.978387	0.925865	9	368.642	368.588	212.485	1.00501	1.02236	1.0767		211.427	9	314.339	311.579	171.598	0.81162	0.708465	0	4		#DIV/0!	#DIV/0!	#DIV/0!	#DIV/0!	#DIV/0!	8	345.223	344.292	218.904	1.03536	1.01683	1.05774	8	334.42	346.505	197.924	0.936137	0.837255	0.441764	9	278.949	298.186	158.469	0.74952	0.803217
10	349.372						10	381.931								10	315.471						5							9	365.832						9	361.084						10	310.047
11	340.431						11	355.19								11	304.927						6							10	321.821						10	344.011						11	305.562
Sp8	Red							Red									Red							Red							Red							Red							Red
6	251.515	320.591	302.769	1.07592	1.04358	1.29851	7	309.591	316.423	260.043	0.924084	0.953632	0.682398		281.406	6	225.639	233.677	197.548	0.702004	0.633027	-1.51361	3		#DIV/0!	#DIV/0!	#DIV/0!	#DIV/0!	#DIV/0!	6	414.558	375.03	285.604	1.01492	0.842886	-0.0761658	6	326.515	315.169	283.625	1.00788	0.894291	0.27594	6	363.978	329.933	301.493	1.07138	0.990448
7	366.124						8	348.697								7	255.139						4							7	406.847						7	365.241						7	367.237
8	344.135						9	290.982								8	220.252						5							8	303.686						8	253.752						8	258.584
	Green							Green									Green							Green							Green							Green							Green
6	323.803	333.255	203.91	1.00963	0.992781	0.950551	7	349.431	356.122	200.019	0.990369	1.00747	1.05116		201.965	6	329.912	337.573	197.592	0.978351	0.854005	0	3		#DIV/0!	#DIV/0!	#DIV/0!	#DIV/0!	#DIV/0!	6	293.139	311.063	185.675	0.919345	0.90289	0.334838	6	357.288	349.795	201.215	0.996288	0.891052	0.253756	6	321.197	318.735	179.017	0.886381	0.949882
7	331.102						8	370.252								7	345.31						4							7	332.128						7	370.102						7	321.741
8	344.861						9	348.683								8	337.496						5							8	307.923						8	321.996						8	313.266
Sp9	Red							Red									Red							Red							Red							Red							Red
5		#DIV/0!	#DIV/0!	#DIV/0!	#DIV/0!	#DIV/0!	5		#DIV/0!	#DIV/0!	#DIV/0!	#DIV/0!	#DIV/0!		#DIV/0!	3		#DIV/0!	#DIV/0!	#DIV/0!	#DIV/0!	#DIV/0!	3		#DIV/0!	#DIV/0!	#DIV/0!	#DIV/0!	#DIV/0!	2		#DIV/0!	#DIV/0!	#DIV/0!	#DIV/0!	#DIV/0!	60		#DIV/0!	#DIV/0!	#DIV/0!	#DIV/0!	#DIV/0!	2		#DIV/0!	#DIV/0!	#DIV/0!	#DIV/0!
6							6									4							4							3							90							3
7							7									5							5							4							120							4
	Green							Green									Green							Green							Green							Green							Green
5		#DIV/0!	#DIV/0!	#DIV/0!	#DIV/0!	#DIV/0!	5		#DIV/0!	#DIV/0!	#DIV/0!	#DIV/0!	#DIV/0!		#DIV/0!	3		#DIV/0!	#DIV/0!	#DIV/0!	#DIV/0!	#DIV/0!	3		#DIV/0!	#DIV/0!	#DIV/0!	#DIV/0!	#DIV/0!	2		#DIV/0!	#DIV/0!	#DIV/0!	#DIV/0!	#DIV/0!	60		#DIV/0!	#DIV/0!	#DIV/0!	#DIV/0!	#DIV/0!	2		#DIV/0!	#DIV/0!	#DIV/0!	#DIV/0!
6							6									4							4							3							90							3
7							7									5							5							4							120							4
Sp10	Red							Red									Red							Red							Red							Red							Red
															#DIV/0!
	Green							Green									Green							Green							Green							Green							Green
															#DIV/0!
		AVG RED	#DIV/0!	AVG GRN	#DIV/0!				AVG RED	#DIV/0!	AVG GRN	#DIV/0!						AVG RED	#DIV/0!	AVG GRN	#DIV/0!				AVG RED	#DIV/0!	AVG GRN	#DIV/0!				AVG RED	#DIV/0!	AVG GRN	#DIV/0!				AVG RED	#DIV/0!	AVG GRN	#DIV/0!				AVG RED	#DIV/0!	AVG GRN	#DIV/0!
		AVG RED0	#DIV/0!	AVG GRN0	#DIV/0!				AVG RED0	#DIV/0!	AVG GRN0	#DIV/0!						AVG RED0	#DIV/0!	AVG GRN0	#DIV/0!				AVG RED0	#DIV/0!	AVG GRN0	#DIV/0!				AVG RED0	#DIV/0!	AVG GRN0	#DIV/0!				AVG RED0	#DIV/0!	AVG GRN0	#DIV/0!				AVG RED0	#DIV/0!	AVG GRN0	#DIV/0!
bg1	Red	AVG	AVG Total				bg1	Red	AVG	AVG Total						bg1	Red	AVG	AVG Total				bg1	Red	AVG	AVG Total				bg1	Red	AVG	AVG Total				bg1	Red	AVG	AVG Total				bg1	Red	AVG	AVG Total
5	17.3264	16.1748	17.822				5	56.7569	52.9595	56.3804						5	37.5069	32.3107	36.1285				3		#DIV/0!	#DIV/0!				5	94.0799	89.0116	89.4267				5	30.2049	25.3947	31.5447				5	22.6632	22.3727	28.4404
6	19.8542						6	54.2118								6	34.875						4							6	89.5799						6	24						6	21.9583
7	17.4583						7	50.2222								7	28.9201						5							7	90.1389						7	21.9444						7	22.7014
8	14.6354						8	51.9757								8	28.6528						6							8	90.6562						8	24.4236						8	21.4861
9	13.9618						9	52.8333								9	33.4826						7							9	85.3854						9	26.2639						9	21.8854
10	13.8125						10	51.7569								10	30.4271						8							10	84.2292						10	25.5312						10	23.5417
	Green							Green									Green							Green							Green							Green							Green
5	220.115	172.16	129.346				5	230.271	194.642	156.102						5	201.281	182.549	139.981				3		#DIV/0!	#DIV/0!				5	223.149	169.457	125.388				5	223.083	177.825	148.58				5	167.795	156.503	139.717
6	182.799						6	191								6	184.208						4							6	174.833						6	196						6	161.569
7	170.799						7	178.441								7	177.944						5							7	151.226						7	166.576						7	153.306
8	141.115						8	189.292								8	181.392						6							8	139.108						8	150.872						8	143.059
9	153.997						9	185.351								9	160.993						7							9	150.51						9	155.566						9	147.972
10	164.135						10	193.497								10	189.476						8							10	177.917						10	174.854						10	165.319
bg2	Red						bg2	Red								bg2	Red						bg2	Red						bg2	Red						bg2	Red						bg2	Red
5	17.7465	14.9155					5	58.6493	56.4022							5	39.0764	33.8999					3		#DIV/0!					5	89.9062	86.5104					5	28.5694	29.9132					5	29.8854	29.2951
6	14.316						6	57.3646								6	31.4028						4							6	85.8542						6	33.9201						6	31.3611
7	13.2153						7	57.4826								7	27.875						5							7	84.6771						7	36.434						7	29.4722
8	15.4236						8	55.191								8	32.8819						6							8	87.0729						8	30.6354						8	30.059
9	13.2743						9	53.5243								9	35.2674						7							9	88.2917						9	26.5347						9	29.0903
10	15.5174						10	56.2014								10	36.8958						8							10	83.2604						10	23.3854						10	25.9028
	Green							Green									Green							Green							Green							Green							Green
5	96.0312	83.4485					5	109.052	112.9							5	95.0694	88.1991					3		#DIV/0!					5	70.3681	72.6134					5	102.031	99.4711					5	119.844	106.879
6	85.9444						6	113.101								6	86.6562						4							6	82.9618						6	113.688						6	108.021
7	83.7847						7	111.694								7	93.25						5							7	70.6701						7	111.885						7	103.729
8	83.3472						8	117.576								8	91.5799						6							8	69.3229						8	99.2465						8	102.719
9	71.9583						9	114.621								9	83.5						7							9	66.0243						9	89.3785						9	108.295
10	79.625						10	111.358								10	79.1389						8							10	76.3333						10	80.5972						10	98.6667
bg3	Red						bg3	Red								bg3	Red						bg3	Red						bg3	Red						bg3	Red						bg3	Red
5	26.3542	22.3756					5	65.7292	59.7795							5	45.6979	42.1748					3		#DIV/0!					5	96.7257	92.7581					5	39.8333	39.3264					5	38.5625	33.6534
6	21.0243						6	61.3889								6	40.3889						4							6	95.8576						6	38.7569						6	36.3681
7	25.4549						7	59.3542								7	39.1875						5							7	93.4722						7	40.6111						7	35.2014
8	19.8403						8	58.1701								8	40.4444						6							8	86.3333						8	40.3056						8	33.3333
9	19.6146						9	57.0694								9	44.1632						7							9	92.4167						9	38.1806						9	30.0625
10	21.9653						10	56.9653								10	43.1667						8							10	91.7431						10	38.2708						10	28.3924
	Green							Green									Green							Green							Green							Green							Green
5	128.333	132.429					5	153.941	160.764							5	148.875	149.194					3		#DIV/0!					5	142.212	134.094					5	183.965	168.445					5	165.639	155.77
6	142.375						6	154.948								6	138.715						4							6	125.236						6	172.042						6	152.132
7	133.354						7	165.208								7	144.611						5							7	138.535						7	157.076						7	162.094
8	135.177						8	171.399								8	151.146						6							8	143.302						8	148.656						8	157.243
9	124.559						9	167.031								9	156.42						7							9	138.444						9	170.504						9	146.358
10	130.774						10	152.059								10	155.399						8							10	116.833						10	178.427						10	151.153
	Baseline1							Baseline2									Bleach0							Bleach2							Bleach5							Bleach10							Bleach15
cnt1	Red	AVG	AVG-Bg	AVG total	Norm B		cnt1	Red	AVG	AVG-Bg	AVG total	Norm B			Baseline T	cnt1	Red	AVG	AVG-Bg	AVG total	Norm B		cnt1	Red	AVG	AVG-Bg	AVG total	Norm B		cnt1	Red	AVG	AVG-Bg	AVG total	Norm B		cnt1	Red	AVG	AVG-Bg	AVG total	Norm B		cnt1	Red	AVG	AVG-Bg	AVG total	Norm B
9	256.454	296.911	279.089	280.711	1.03098		10	358.932	318.108	261.728	263.838	0.969016			272.275	9	280.942	320.784	284.655	301.943	1.10896		6		#DIV/0!	#DIV/0!	#DIV/0!	#DIV/0!		9	362.089	381.054	291.627	327.845	1.2041		9	264.549	274.936	243.392	306.859	1.12702		9	268.669	320.099	291.659	294.523	1.08171
10	351.212						11	342.676								10	363.877						7							10	432.369						10	317.007						10	363.898
11	283.068						12	252.717								11	317.532						8							11	348.703						11	243.253						11	327.73
	Green							Green									Green							Green							Green							Green							Green
9	342.973	363.755	234.41	313.698	1.01697		10	395.092	405.474	249.372	303.227	0.983027			308.462	9	353.409	370.103	230.123	353.375	1.1456		6		#DIV/0!	#DIV/0!	#DIV/0!	#DIV/0!		9	331.512	335.985	210.597	314.084	1.01823		9	343.686	372.079	223.498	344.893	1.1181		9	290.464	342.637	202.92	287.841	0.933148
10	375.488						11	417.754								10	374.925						7							10	347.495						10	382.208						10	360.829
11	372.805						12	403.577								11	381.976						8							11	328.949						11	390.341						11	376.618
cnt2	Red						cnt2	Red								cnt2	Red						cnt2	Red						cnt2	Red						cnt2	Red						cnt2	Red
12	275.219	271.657	253.835				12	251.778	304.796	248.416						12	295.194	280.108	243.98				4		#DIV/0!	#DIV/0!				11	349.387	391.368	301.941				11	285.956	301.793	270.248				11	257.073	303.7	275.259
13	289.533						13	325.846								13	307.283						5							12	439.06						12	330.013						12	340.905
14	250.219						14	336.764								14	237.848						6							13	385.657						13	289.41						13	313.121
	Green							Green									Green							Green							Green							Green							Green
12	437.848	449.78	320.434				12	457.059	476.548	320.445						12	473.775	488.859	348.879				4		#DIV/0!	#DIV/0!				11	412.314	444.799	319.411				11	431.81	469.928	321.348				11	375.702	430.694	290.977
13	445.521						13	490.053								13	491.927						5							12	442.876						12	470.854						12	443.381
14	465.971						14	482.531								14	500.876						6							13	479.206						13	507.121						13	473
cnt3	Red						cnt3	Red								cnt3	Red						cnt3	Red						cnt3	Red						cnt3	Red						cnt3	Red
12	417.58	429.064	411.242				11	323.192	373.382	317.002						13	481.708	555.797	519.669				4		#DIV/0!	#DIV/0!				11	493.598	524.331	434.904				12	530.185	574.837	543.293				11	345.16	403.471	375.031
13	492.345						12	436.345								14	599.947						5							12	515.58						13	606.331						12	426.858
14	377.267						13	360.609								15	585.737						6							13	563.815						14	587.996						13	438.395
	Green							Green									Green							Green							Green							Green							Green
12	452.708	546.926	417.581				11	405.772	462.64	306.538						13	631.196	780.403	640.423				4		#DIV/0!	#DIV/0!				11	405.181	494.525	369.137				12	556.043	706.961	558.381				11	363.249	465.389	325.672
13	594.801						12	491.363								14	843.701						5							12	485.833						13	733.324						12	469.808
14	593.27						13	490.786								15	866.313						6							13	592.562						14	831.516						13	563.11
cnt4	Red						cnt4	Red								cnt4	Red						cnt4	Red						cnt4	Red						cnt4	Red						cnt4	Red
12	296.248	268.669	250.847				11	219.655	289.976	233.596						12	349.693	330.161	294.033				5		#DIV/0!	#DIV/0!				11	332.08	398.878	309.452				11	311.832	384.811	353.266				12	394.651	374.822	346.382
13	311.176						12	333.202								13	371.807						6							12	446.021						12	436.588						13	368.76
14	198.584						13	317.071								14	268.983						7							13	418.534						13	406.013						14	361.055
	Green							Green									Green							Green							Green							Green							Green
12	588.521	550.328	420.982				11	412.66	537.482	381.38						12	653.319	620.954	480.973				5		#DIV/0!	#DIV/0!				11	484.319	584.643	459.255				11	568.109	728.529	579.949				12	735.534	708.122	568.405
13	600.504						12	603.458								13	690.42						6							12	609.861						12	806.613						13	702.403
14	461.958						13	596.328								14	519.122						7							13	659.748						13	810.866						14	686.429
cnt5	Red						cnt5	Red								cnt5	Red						cnt5	Red						cnt5	Red						cnt5	Red						cnt5	Red
11	221.445	227.345	209.523				11	232.193	259.223	202.842						11	212.891	220.514	184.386				5		#DIV/0!	#DIV/0!				11	333.992	321.444	232.017				11	247.576	231.948	200.404				12	270.311	283.592	255.152
12	263.702						12	282.227								12	236.298						6							12	351.374						12	254.5						13	288.584
13	196.887						13	263.248								13	212.353						7							13	278.966						13	193.769						14	291.882
	Green							Green									Green							Green							Green							Green							Green
11	441.5	416.805	287.46				11	439.067	431.172	275.07						11	469.139	461.995	322.014				5		#DIV/0!	#DIV/0!				11	465.605	410.525	285.137				11	376.21	396.866	248.285				12	340.433	341.783	202.066
12	424.126						12	440.546								12	483.374						6							12	409.084						12	409.164						13	343.349
13	384.79						13	413.903								13	433.471						7							13	356.887						13	405.223						14	341.567
cnt6	Red						cnt6	Red								cnt6	Red						cnt6	Red						cnt6	Red						cnt6	Red						cnt6	Red
6	430.497	482.695	464.873				7	516.507	511.084	454.704						6	492.584	574.414	538.285				7		#DIV/0!	#DIV/0!				6	556.383	631.907	542.481				6	536.94	544.965	513.421				6	514.658	479.604	451.164
7	545.185						8	559.762								7	652.04						8							7	710.279						7	620.406						7	535.044
8	472.403						9	456.983								8	578.617						9							8	629.06						8	477.55						8	389.111
	Green							Green									Green							Green							Green							Green							Green
6	419.04	424.037	294.691				7	474.94	463.65	307.548						6	434.594	459.943	319.962				7		#DIV/0!	#DIV/0!				6	424.775	439.649	314.261				6	484.238	470.421	321.84				6	407.681	390.94	251.222
7	450.96						8	485.279								7	467.07						8							7	450.765						7	498.091						7	410.393
8	402.111						9	430.732								8	478.164						9							8	443.406						8	428.933						8	354.745
cnt7	Red						cnt7	Red								cnt7	Red						cnt7	Red						cnt7	Red						cnt7	Red						cnt7	Red
2	179.113	207.859	190.037				2	211.235	258.919	202.539						2	197.609	209.688	173.559				6		#DIV/0!	#DIV/0!				2	340.47	310.42	220.994				2	198.553	191.63	160.086				2	189.228	186.629	158.189
3	224.719						3	271.818								3	231.934						7							3	323.43						3	201.474						3	202.467
4	219.745						4	293.705								4	199.52						8							4	267.361						4	174.864						4	168.192
	Green							Green									Green							Green							Green							Green							Green
2	521.371	510.842	381.497				2	523.109	559.448	403.346						2	525.397	507.997	368.016				6		#DIV/0!	#DIV/0!				2	503.927	483.943	358.555				2	528.003	519.863	371.283				2	463.44	451.14	311.423
3	530.772						3	571.798								3	505.818						7							3	503.798						3	548.06						3	481.493
4	480.384						4	583.437								4	492.775						8							4	444.103						4	483.526						4	408.487
cnt8	Red						cnt8	Red								cnt8	Red						cnt8	Red						cnt8	Red						cnt8	Red						cnt8	Red
7	247.292	256.584	238.762				7	218.375	270.899	214.519						7	366.729	346.826	310.698				5		#DIV/0!	#DIV/0!				7	477.333	465.852	376.425				7	297.913	273.345	241.8				6	231.042	278.423	249.982
8	282.708						8	303.566								8	363.59						6							8	525.66						8	299.865						7	316.573
9	239.753						9	290.757								9	310.16						7							9	394.562						9	222.257						8	287.653
	Green							Green									Green							Green							Green							Green							Green
7	392.118	386.039	256.694				7	410.795	408.026	251.924						7	433.851	433.632	293.651				5		#DIV/0!	#DIV/0!				7	439.358	418.38	292.992				7	458.076	425.62	277.04				6	379.639	375.961	236.243
8	397.566						8	423.215								8	451.865						6							8	431.073						8	442.403						7	390.17
9	368.434						9	390.069								9	415.181						7							9	384.708						9	376.382						8	358.073
cnt9	Red						cnt9	Red								cnt9	Red						cnt9	Red						cnt9	Red						cnt9	Red						cnt9	Red
3	212.534	246.011	228.189				3	244.03	295.581	239.201						3	199.009	204.348	168.22				5		#DIV/0!	#DIV/0!				2	284.466	330.192	240.765				3	271.829	267.365	235.82				3	251.591	276.327	247.887
4	272.226						4	320.253								4	226.823						6							3	359.735						4	304.857						4	312.424
5	253.274						5	322.46								5	187.213						7							4	346.375						5	225.409						5	264.966
	Green							Green									Green							Green							Green							Green							Green
3	358.643	338.88	209.534				3	382.863	389.521	233.419						3	311.771	316.319	176.338				5		#DIV/0!	#DIV/0!				2	319.692	342.803	217.415				3	378.162	350.992	202.411				3	348.457	341.36	201.642
4	353.052						4	399.348								4	325.482						6							3	348.567						4	357.369						4	352.006
5	304.945						5	386.354								5	311.704						7							4	360.149						5	317.445						5	323.616
cnt10	Red						cnt10	Red								cnt10	Red						cnt10	Red						cnt10	Red						cnt10	Red						cnt10	Red
	Green							Green									Green							Green							Green							Green							Green
[truncated: 34 more columns]

## Sheet: s7_20A
	Baseline1							Baseline2									Bleach0							Bleach2							Bleach5							Bleach10							Bleach20
Sp1	Red	AVG	AVG-Bg	Norm B	Norm CNT	Norm 0		Red	AVG	AVG-Bg	Norm B	Norm CNT	Norm 0		Baseline T		Red	AVG	AVG-Bg	Norm B	Norm CNT	Norm 0		Red	AVG	AVG-Bg	Norm B	Norm CNT	Norm 0		Red	AVG	AVG-Bg	Norm B	Norm CNT	Norm 0		Red	AVG	AVG-Bg	Norm B	Norm CNT	Norm 0		Red	AVG	AVG-Bg	Norm B	Norm CNT
7	275.913	308.981	258.328	0.997763	0.95499	0.882597	7	282.259	298.383	259.486	1.00224	1.04923	1.12841		258.907	7	380.645	490.048	438.614	1.6941	2.2199	4.18195	4		#DIV/0!	#DIV/0!	#DIV/0!	#DIV/0!	#DIV/0!	7	438.526	481.663	429.666	1.65954	1.76363	2.99182	8	327.122	335.311	294.001	1.13555	1.26063	1.67982	8	500.145	474.587	439.989	1.69941	1.25156
8	327.32						8	321.198								8	549.701						5							8	504.82						9	360.355						9	533.828
9	323.709						9	291.692								9	539.799						6							9	501.642						10	318.456						10	389.788
	Green							Green									Green							Green							Green							Green							Green
7	289.238	278.944	109.216	1.07215	0.971317	0.925185	7	283.921	296.417	94.5175	0.927852	1.03533	1.09215		101.867	7	240.119	259.024	65.9094	0.647014	0.616617	0	4		#DIV/0!	#DIV/0!	#DIV/0!	#DIV/0!	#DIV/0!	7	243.68	242.111	64.742	0.635555	0.601724	-0.038846	8	197.945	190.37	37.2594	0.365766	0.409159	-0.541126	8	301.805	312.638	132.148	1.29726	0.914347
8	276.974						8	308.119								8	262.555						5							8	231.073						9	190.276						9	334.346
9	270.619						9	297.209								9	274.398						6							9	251.581						10	182.889						10	301.762
Sp2	Red							Red									Red							Red							Red							Red							Red
7	182.056	184.871	134.218	1.03243	0.988175	0.989839	7	166.611	164.682	125.785	0.967565	1.01293	1.01111		130.001	6	151.747	151.803	100.369	0.772059	1.01169	1.01004	5		#DIV/0!	#DIV/0!	#DIV/0!	#DIV/0!	#DIV/0!	6	200.906	185.941	133.944	1.03033	1.09496	1.08159	6	121.17	129.162	87.8522	0.67578	0.750218	0.785366	6	275.319	259.692	225.094	1.73148	1.27517
8	211.483						8	171.097								7	168.267						6							7	205.035						7	136.083						7	290.08
9	161.073						9	156.337								8	135.396						7							8	151.882						8	130.233						8	213.677
	Green							Green									Green							Green							Green							Green							Green
7	231.653	232.366	62.6385	1.29371	1.17204	1.14784	7	244.535	236.096	34.1969	0.706288	0.788099	0.817917		48.4177	6	169.847	184.795	-8.31951	-0.171828	-0.163755	0	5		#DIV/0!	#DIV/0!	#DIV/0!	#DIV/0!	#DIV/0!	6	191.392	180.002	2.63291	0.0543791	0.0514845	0.184953	6	135.458	142.944	-10.1663	-0.209971	-0.234881	-0.0611175	6	279.028	280.159	99.6687	2.05852	1.45091
8	247.816						8	228.149								7	193.278						6							7	190.104						7	142.438						7	291.167
9	217.629						9	235.604								8	191.26						7							8	158.51						8	150.938						8	270.281
Sp3	Red							Red									Red							Red							Red							Red							Red
5	429.149	443.455	392.802	1.11725	1.06936	1.11218	5	303.137	349.251	310.354	0.882746	0.924137	0.877296		351.578	6	422.893	425.64	374.206	1.06436	1.39471	1.63842	3		#DIV/0!	#DIV/0!	#DIV/0!	#DIV/0!	#DIV/0!	5	512.61	513.849	461.852	1.31365	1.39605	1.64059	5	536.921	509.448	468.139	1.33154	1.47821	1.77347	5	601.418	537.645	503.047	1.43083	1.05375
6	506.637						6	396.704								7	475.427						4							6	569.887						6	576.616						6	602.921
7	394.579						7	347.912								8	378.601						5							7	459.049						7	414.808						7	408.595
	Green							Green									Green							Green							Green							Green							Green
5	488.238	507.077	337.35	1.05772	0.958248	0.932468	5	496.088	502.43	300.53	0.942278	1.05142	1.08318		318.94	6	302.021	320.87	127.755	0.400562	0.381743	0	3		#DIV/0!	#DIV/0!	#DIV/0!	#DIV/0!	#DIV/0!	5	325.518	353.305	175.936	0.551625	0.522263	0.227283	5	375.567	386.638	233.527	0.732197	0.819063	0.707343	5	445.256	462.333	281.843	0.883687	0.62285
6	555.415						6	514.122								7	340.994						4							6	375.912						6	417.259						6	475.93
7	477.579						7	497.079								8	319.594						5							7	358.485						7	367.088						7	465.814
Sp4	Red							Red									Red							Red							Red							Red							Red
5	351.412	377.673	327.02	1.12369	1.07552	1.07635	5	247.067	293.923	255.026	0.876308	0.917398	0.916488		291.023	6	142.765	128.722	77.2867	0.265569	0.347995	0.340816	3		#DIV/0!	#DIV/0!	#DIV/0!	#DIV/0!	#DIV/0!	5	214.53	194.959	142.962	0.491241	0.522052	0.516789	4	149.939	193.221	151.912	0.521992	0.57949	0.57486	4	239.201	286.388	251.79	0.865191	0.637184
6	447.503						6	333.332								7	142.207						4							6	220.073						5	227.515						5	333.171
7	334.104						7	301.369								8	101.192						5							7	150.274						6	202.21						6	286.793
	Green							Green									Green							Green							Green							Green							Green
5	521.454	537.026	367.299	1.12458	1.01882	1.01903	5	464.146	487.82	285.921	0.87542	0.976822	0.976566		326.61	6	178.677	196.847	3.73269	0.0114286	0.0108917	0	3		#DIV/0!	#DIV/0!	#DIV/0!	#DIV/0!	#DIV/0!	5	249.521	218.184	40.8146	0.124964	0.118312	0.108604	4	255.338	243.753	90.6423	0.277525	0.310449	0.302856	4	316.549	293.696	113.206	0.34661	0.244301
6	595.774						6	541.189								7	220.53						4							6	229.979						5	238.753						5	300.649
7	493.851						7	458.125								8	191.335						5							7	175.052						6	237.168						6	263.89
Sp5	Red							Red									Red							Red							Red							Red							Red
6	438.692	473.086	422.433	1.19514	1.1439	1.15917	6	284.851	323.384	284.487	0.804863	0.842603	0.825899		353.46	7	207.329	250.745	199.31	0.563882	0.738897	0.711185	4		#DIV/0!	#DIV/0!	#DIV/0!	#DIV/0!	#DIV/0!	7	473.405	426.086	374.089	1.05836	1.12475	1.13798	6	327.25	415.944	374.634	1.0599	1.17665	1.1954	6	186.659	215.047	180.449	0.51052	0.375981
7	571.192						7	381.14								8	287.582						5							8	465.216						7	499.305						7	245.027
8	409.375						8	304.162								9	257.323						6							9	339.637						8	421.277						8	213.454
	Green							Green									Green							Green							Green							Green							Green
6	523.415	538.111	368.383	1.04082	0.942935	0.936878	6	526.777	541.388	339.489	0.959181	1.07029	1.07774		353.936	7	216.32	228.748	35.6334	0.100677	0.0959475	0	4		#DIV/0!	#DIV/0!	#DIV/0!	#DIV/0!	#DIV/0!	7	254.585	255.518	78.1489	0.220799	0.209046	0.125102	6	205.305	251.973	98.8619	0.279321	0.312459	0.23949	6	259.549	266.221	85.7307	0.242221	0.170725
7	591.137						7	585.369								8	252.095						5							8	277.619						7	259.75						7	279.244
8	499.78						8	512.018								9	217.829						6							9	234.351						8	290.863						8	259.869
Sp6	Red							Red									Red							Red							Red							Red							Red
6	333.601	363.928	313.275	1.04746	1.00255	1.00227	7	361.628	323.785	284.888	0.952542	0.997207	0.997522		299.081	8	125.567	118.353	66.9178	0.223745	0.293189	0.373059	5		#DIV/0!	#DIV/0!	#DIV/0!	#DIV/0!	#DIV/0!	7	314.79	279.997	228.001	0.762337	0.810152	0.831604	6	188.625	256.077	214.768	0.718091	0.79719	0.820107	6	202.674	258.628	224.03	0.749061	0.551658
7	412.878						8	360.058								9	132.229						6							8	305.162						7	292.598						7	289.268
8	345.305						9	249.668								10	97.2622						7							9	220.04						8	287.009						8	283.942
	Green							Green									Green							Green							Green							Green							Green
6	290.354	330.529	160.802	1.03283	0.935697	0.942963	7	353.72	352.479	150.579	0.96717	1.0792	1.07025		155.691	8	146.213	172.303	-20.812	-0.133675	-0.127395	0	5		#DIV/0!	#DIV/0!	#DIV/0!	#DIV/0!	#DIV/0!	7	197.659	203.923	26.5532	0.170551	0.161473	0.256226	6	212.216	218.655	65.5446	0.420992	0.470937	0.530721	6	267.622	268.536	88.0457	0.565516	0.398593
7	346.841						8	384.134								9	177.296						6							8	213.71						7	229.659						7	256.32
8	354.393						9	319.582								10	193.399						7							9	200.399						8	214.091						8	281.665
Sp7	Red							Red									Red							Red							Red							Red							Red
6		#DIV/0!	#DIV/0!	#DIV/0!	#DIV/0!	#DIV/0!	6		#DIV/0!	#DIV/0!	#DIV/0!	#DIV/0!	#DIV/0!		#DIV/0!	5		#DIV/0!	#DIV/0!	#DIV/0!	#DIV/0!	#DIV/0!	4		#DIV/0!	#DIV/0!	#DIV/0!	#DIV/0!	#DIV/0!	4		#DIV/0!	#DIV/0!	#DIV/0!	#DIV/0!	#DIV/0!	120		#DIV/0!	#DIV/0!	#DIV/0!	#DIV/0!	#DIV/0!	4		#DIV/0!	#DIV/0!	#DIV/0!	#DIV/0!
7							7									6							5							5							150							5
8							8									7							6							6							180							6
	Green							Green									Green							Green							Green							Green							Green
6		#DIV/0!	#DIV/0!	#DIV/0!	#DIV/0!	#DIV/0!	6		#DIV/0!	#DIV/0!	#DIV/0!	#DIV/0!	#DIV/0!		#DIV/0!	5		#DIV/0!	#DIV/0!	#DIV/0!	#DIV/0!	#DIV/0!	4		#DIV/0!	#DIV/0!	#DIV/0!	#DIV/0!	#DIV/0!	4		#DIV/0!	#DIV/0!	#DIV/0!	#DIV/0!	#DIV/0!	120		#DIV/0!	#DIV/0!	#DIV/0!	#DIV/0!	#DIV/0!	4		#DIV/0!	#DIV/0!	#DIV/0!	#DIV/0!
7							7									6							5							5							150							5
8							8									7							6							6							180							6
Sp8	Red							Red									Red							Red							Red							Red							Red
5		#DIV/0!	#DIV/0!	#DIV/0!	#DIV/0!	#DIV/0!	5		#DIV/0!	#DIV/0!	#DIV/0!	#DIV/0!	#DIV/0!		#DIV/0!	3		#DIV/0!	#DIV/0!	#DIV/0!	#DIV/0!	#DIV/0!	3		#DIV/0!	#DIV/0!	#DIV/0!	#DIV/0!	#DIV/0!	2		#DIV/0!	#DIV/0!	#DIV/0!	#DIV/0!	#DIV/0!	90		#DIV/0!	#DIV/0!	#DIV/0!	#DIV/0!	#DIV/0!	5		#DIV/0!	#DIV/0!	#DIV/0!	#DIV/0!
6							6									4							4							3							120							6
7							7									5							5							4							150							7
	Green							Green									Green							Green							Green							Green							Green
5		#DIV/0!	#DIV/0!	#DIV/0!	#DIV/0!	#DIV/0!	5		#DIV/0!	#DIV/0!	#DIV/0!	#DIV/0!	#DIV/0!		#DIV/0!	3		#DIV/0!	#DIV/0!	#DIV/0!	#DIV/0!	#DIV/0!	3		#DIV/0!	#DIV/0!	#DIV/0!	#DIV/0!	#DIV/0!	2		#DIV/0!	#DIV/0!	#DIV/0!	#DIV/0!	#DIV/0!	90		#DIV/0!	#DIV/0!	#DIV/0!	#DIV/0!	#DIV/0!	5		#DIV/0!	#DIV/0!	#DIV/0!	#DIV/0!
6							6									4							4							3							120							6
7							7									5							5							4							150							7
Sp9	Red							Red									Red							Red							Red							Red							Red
5		#DIV/0!	#DIV/0!	#DIV/0!	#DIV/0!	#DIV/0!	5		#DIV/0!	#DIV/0!	#DIV/0!	#DIV/0!	#DIV/0!		#DIV/0!	3		#DIV/0!	#DIV/0!	#DIV/0!	#DIV/0!	#DIV/0!	3		#DIV/0!	#DIV/0!	#DIV/0!	#DIV/0!	#DIV/0!	2		#DIV/0!	#DIV/0!	#DIV/0!	#DIV/0!	#DIV/0!	60		#DIV/0!	#DIV/0!	#DIV/0!	#DIV/0!	#DIV/0!	2		#DIV/0!	#DIV/0!	#DIV/0!	#DIV/0!
6							6									4							4							3							90							3
7							7									5							5							4							120							4
	Green							Green									Green							Green							Green							Green							Green
5		#DIV/0!	#DIV/0!	#DIV/0!	#DIV/0!	#DIV/0!	5		#DIV/0!	#DIV/0!	#DIV/0!	#DIV/0!	#DIV/0!		#DIV/0!	3		#DIV/0!	#DIV/0!	#DIV/0!	#DIV/0!	#DIV/0!	3		#DIV/0!	#DIV/0!	#DIV/0!	#DIV/0!	#DIV/0!	2		#DIV/0!	#DIV/0!	#DIV/0!	#DIV/0!	#DIV/0!	60		#DIV/0!	#DIV/0!	#DIV/0!	#DIV/0!	#DIV/0!	2		#DIV/0!	#DIV/0!	#DIV/0!	#DIV/0!
6							6									4							4							3							90							3
7							7									5							5							4							120							4
Sp10	Red							Red									Red							Red							Red							Red							Red
															#DIV/0!
	Green							Green									Green							Green							Green							Green							Green
															#DIV/0!
		AVG RED	#DIV/0!	AVG GRN	#DIV/0!				AVG RED	#DIV/0!	AVG GRN	#DIV/0!						AVG RED	#DIV/0!	AVG GRN	#DIV/0!				AVG RED	#DIV/0!	AVG GRN	#DIV/0!				AVG RED	#DIV/0!	AVG GRN	#DIV/0!				AVG RED	#DIV/0!	AVG GRN	#DIV/0!				AVG RED	#DIV/0!	AVG GRN	#DIV/0!
		AVG RED0	#DIV/0!	AVG GRN0	#DIV/0!				AVG RED0	#DIV/0!	AVG GRN0	#DIV/0!						AVG RED0	#DIV/0!	AVG GRN0	#DIV/0!				AVG RED0	#DIV/0!	AVG GRN0	#DIV/0!				AVG RED0	#DIV/0!	AVG GRN0	#DIV/0!				AVG RED0	#DIV/0!	AVG GRN0	#DIV/0!				AVG RED0	#DIV/0!	AVG GRN0	#DIV/0!
bg1	Red	AVG	AVG Total				bg1	Red	AVG	AVG Total						bg1	Red	AVG	AVG Total				bg1	Red	AVG	AVG Total				bg1	Red	AVG	AVG Total				bg1	Red	AVG	AVG Total				bg1	Red	AVG	AVG Total
5	61.1633	54.6372	50.653				5	39.7867	36.5056	38.897						5	66.8533	58.6156	51.4348				3		#DIV/0!	#DIV/0!				5	64.92	59.54	51.9967				5	45.8767	44.6128	41.3098				5	42.44	42.5433	34.598
6	62.1967						6	36.5767								6	57.4067						4							6	60.9167						6	46.9433						6	43.7
7	59.0333						7	37.9467								7	57.52						5							7	57.4133						7	46.97						7	37.83
8	49.5933						8	35.3467								8	55.1367						6							8	63.1667						8	46.3933						8	38.8067
9	48.8067						9	39.28								9	57.0567						7							9	57.3867						9	39.9933						9	47.4933
10	47.03						10	30.0967								10	57.72						8							10	53.4367						10	41.5						10	44.99
	Green							Green									Green							Green							Green							Green							Green
5	174.077	164.242	169.727				5	186.047	212.833	201.899						5	190.247	197.192	193.115				3		#DIV/0!	#DIV/0!				5	184.027	178.919	177.369				5	143.54	146.889	153.111				5	279.097	257.329	180.49
6	146.347						6	197.053								6	199.303						4							6	185.57						6	151.123						6	267.023
7	185.203						7	213.88								7	208.5						5							7	174.44						7	156.63						7	276.32
8	166.113						8	228.747								8	199.017						6							8	184.663						8	136.147						8	253.78
9	152.613						9	225.107								9	193.74						7							9	179.733						9	146.42						9	238.823
10	161.097						10	226.167								10	192.347						8							10	165.08						10	147.473						10	228.93
bg2	Red						bg2	Red								bg2	Red						bg2	Red						bg2	Red						bg2	Red						bg2	Red
5	48.7567	46.6583					5	40.0467	39.9706							5	54.62	49.7056					3		#DIV/0!					5	56.2867	51.5806					5	40.8067	41.4561					5	32.2667	29.5056
6	50.62						6	42.1433								6	49.2367						4							6	52.39						6	46.3867						6	28.9967
7	45.92						7	42.47								7	44.5933						5							7	54.94						7	43.6533						7	30.4667
8	47.79						8	38.8367								8	52.8067						6							8	44.9433						8	42.2233						8	31.72
9	48.6167						9	37.4833								9	49.5167						7							9	50.8467						9	42.4367						9	27.5133
10	38.2467						10	38.8433								10	47.46						8							10	50.0767						10	33.23						10	26.07
	Green							Green									Green							Green							Green							Green							Green
5	166.877	172.187					5	208.51	204.461							5	242.293	243.432					3		#DIV/0!					5	202.913	220.087					5	186.117	170.111					5	129.643	139.532
6	177.617						6	208.547								6	250.307						4							6	206.403						6	161.217						6	138.397
7	151.607						7	195.497								7	232.737						5							7	206.617						7	155.18						7	137.227
8	163.577						8	205.25								8	237.897						6							8	210.68						8	158.993						8	137.593
9	197.563						9	206.61								9	255.363						7							9	242.307						9	170.873						9	143.56
10	175.883						10	202.353								10	241.997						8							10	251.6						10	188.287						10	150.77
bg3	Red						bg3	Red								bg3	Red						bg3	Red						bg3	Red						bg3	Red						bg3	Red
5	50.2867	50.6633					5	46.66	40.215							5	51	45.9833					3		#DIV/0!					5	46.1233	44.8694					5	38.29	37.8605					5	35.08	31.745
6	49.6467						6	42.95								6	49.1967						4							6	52.8733						6	40.18						6	33.73
7	47.4233						7	38.6733								7	47.9067						5							7	49.2967						7	37.5233						7	35.9267
8	58.76						8	33.7967								8	39.8733						6							8	42.6933						8	42.4533						8	28.1533
9	48.29						9	38.3867								9	42.11						7							9	39.4667						9	34.0967						9	27.8167
10	49.5733						10	40.8233								10	45.8133						8							10	38.7633						10	34.62						10	29.7633
	Green							Green									Green							Green							Green							Green							Green
5	146	172.753					5	164.373	188.403							5	136.087	138.719					3		#DIV/0!					5	104.387	133.103					5	127.79	142.332					5	144.827	144.609
6	151.727						6	175.533								6	134.937						4							6	127.093						6	115.543						6	149.687
7	171.623						7	180.333								7	126.97						5							7	134.27						7	149.683						7	142.19
8	196.687						8	183.99								8	134.363						6							8	131.353						8	142.22						8	144.777
9	186.333						9	209.133								9	147.9						7							9	147.003						9	151.837						9	145.017
10	184.147						10	217.057								10	152.06						8							10	154.51						10	166.92						10	141.16
	Baseline1							Baseline2									Bleach0							Bleach2							Bleach5							Bleach10							Bleach15
cnt1	Red	AVG	AVG-Bg	AVG total	Norm B		cnt1	Red	AVG	AVG-Bg	AVG total	Norm B			Baseline T	cnt1	Red	AVG	AVG-Bg	AVG total	Norm B		cnt1	Red	AVG	AVG-Bg	AVG total	Norm B		cnt1	Red	AVG	AVG-Bg	AVG total	Norm B		cnt1	Red	AVG	AVG-Bg	AVG total	Norm B		cnt1	Red	AVG	AVG-Bg	AVG total	Norm B
5	226.684	216.925	166.272	213.048	1.04479		4	169.354	173.975	135.078	194.781	0.955211			203.914	4	164.361	180.104	128.67	155.615	0.76314		6		#DIV/0!	#DIV/0!	#DIV/0!	#DIV/0!		4	222.231	212.518	160.521	191.879	0.94098		5	180.823	171.193	129.883	183.681	0.900778		4	311.87	302.622	268.024	276.882	1.35784
6	243.244						5	181.873								5	197.085						7							5	226.592						6	178.389						5	337.041
7	180.848						6	170.699								6	178.867						8							6	188.731						7	154.367						6	258.956
	Green							Green									Green							Green							Green							Green							Green
5	247	238.342	68.6145	191.191	1.10381		4	234.715	233.513	31.6135	155.229	0.896192			173.21	4	268.737	268.338	75.2229	181.749	1.0493		6		#DIV/0!	#DIV/0!	#DIV/0!	#DIV/0!		4	239.68	246.49	69.1209	182.948	1.05622		5	207.873	206.553	53.442	154.84	0.893945		4	304.329	301.565	121.075	245.747	1.41878
6	242.396						5	236.687								5	284.351						7							5	260.902						6	212.063						5	299.339
7	225.63						6	229.136								6	251.924						8							6	238.889						7	199.721						6	301.029
cnt2	Red						cnt2	Red								cnt2	Red						cnt2	Red						cnt2	Red						cnt2	Red						cnt2	Red
5	195.73	199.545	148.892				5	175.02	183.889	144.992						5	190.58	207.723	156.289				4		#DIV/0!	#DIV/0!				4	185.43	227.809	175.812				5	169.623	192.374	151.065				5	214.28	234.189	199.591
6	203.983						6	195.757								6	214.397						5							5	260.033						6	206.12						6	263.39
7	198.923						7	180.89								7	218.193						6							6	237.963						7	201.38						7	224.897
	Green							Green									Green							Green							Green							Green							Green
5	282.447	276.72	106.993				5	273.237	275.029	73.1298						5	355.183	360.642	167.527				4		#DIV/0!	#DIV/0!				4	286.627	299.831	122.462				5	249.36	256.542	103.431				5	345.61	364.178	183.688
6	265.97						6	272.907								6	368.44						5							5	297.563						6	254.073						6	386.12
7	281.743						7	278.943								7	358.303						6							6	315.303						7	266.193						7	360.803
cnt3	Red						cnt3	Red								cnt3	Red						cnt3	Red						cnt3	Red						cnt3	Red						cnt3	Red
4	197.147	258.844	208.191				4	207.123	243.48	204.583						5	194.713	178.39	126.955				4		#DIV/0!	#DIV/0!				4	207.583	251.74	199.743				5	243.9	229.289	187.979				4	249.283	301.6	267.002
5	297.463						5	283.033								6	201.913						5							5	289.663						6	253.17						5	338.807
6	281.923						6	240.283								7	138.543						6							6	257.973						7	190.797						6	316.71
	Green							Green									Green							Green							Green							Green							Green
4	270.947	296.903	127.176				4	274.057	303.38	101.481						5	312.913	337.357	144.242				4		#DIV/0!	#DIV/0!				4	282.913	322.288	144.918				5	287.113	283.706	130.595				4	425.667	441.352	260.862
5	305.273						5	318.37								6	353.86						5							5	361.987						6	307.077						5	452.29
6	314.49						6	317.713								7	345.297						6							6	321.963						7	256.927						6	446.1
cnt4	Red						cnt4	Red								cnt4	Red						cnt4	Red						cnt4	Red						cnt4	Red						cnt4	Red
4	277.403	272.254	221.601				4	218.023	222.799	183.902						4	135.393	144.963	93.5285				5		#DIV/0!	#DIV/0!				4	224.78	201.556	149.559				3	197.103	220.428	179.118				3	234.013	246.677	212.079
5	305.12						5	251.253								5	168.303						6							5	230.157						4	237.287						4	275.567
6	234.24						6	199.12								6	131.193						7							6	149.73						5	226.893						5	230.45
	Green							Green									Green							Green							Green							Green							Green
4	477.663	470.025	300.298				4	444.217	412.298	210.399						4	421.797	399.939	206.824				5		#DIV/0!	#DIV/0!				4	408.693	381.655	204.286				3	330.543	354.96	201.849				3	396.32	385.205	204.715
5	516.91						5	419.957								5	378.82						6							5	392.01						4	370.033						4	399.027
6	415.503						6	372.72								6	399.2						7							6	344.263						5	364.303						5	360.267
cnt5	Red						cnt5	Red								cnt5	Red						cnt5	Red						cnt5	Red						cnt5	Red						cnt5	Red
9	350.03	324.52	273.867				9	289.123	270.683	231.786						9	153.053	176.36	124.925				5		#DIV/0!	#DIV/0!				9	237.513	249.728	197.731				9	225.643	235.475	194.166				9	348.693	335.698	301.1
10	355.717						10	294.867								10	202.183						6							10	281.663						10	273.66						10	380.857
11	267.813						11	228.06								11	173.843						7							11	230.007						11	207.123						11	277.543
	Green							Green									Green							Green							Green							Green							Green
9	486.247	538.659	368.932				9	507.61	526.638	324.738						9	317.68	379.803	186.689				5		#DIV/0!	#DIV/0!				9	336.043	422.408	245.038				9	353.553	380.87	227.759				9	480.967	523.762	343.272
10	546.76						10	552.723								10	406.9						6							10	443.11						10	400.76						10	552.07
11	582.97						11	519.58								11	414.83						7							11	488.07						11	388.297						11	538.25
cnt6	Red						cnt6	Red								cnt6	Red						cnt6	Red						cnt6	Red						cnt6	Red						cnt6	Red
11	227.29	262.271	211.618				11	222.917	210.58	171.683						12	195.53	173.225	121.79				7		#DIV/0!	#DIV/0!				11	188.15	211.102	159.106				11	218.507	236.32	195.01				11	208.98	256.694	222.096
12	310.793						12	234.6								13	189.357						8							12	228.727						12	260.473						12	296.85
13	248.73						13	174.223								14	134.787						9							13	216.43						13	229.98						13	264.253
	Green							Green									Green							Green							Green							Green							Green
11	438.913	425.78	256.052				11	402.303	404.292	202.393						12	395.85	387.531	194.416				7		#DIV/0!	#DIV/0!				11	351.29	376.177	198.807				11	327.683	355.23	202.119				11	418.617	415.4	234.91
12	433.783						12	422.103								13	414.3						8							12	399.713						12	363.537						12	432.32
13	404.643						13	388.47								14	352.443						9							13	377.527						13	374.47						13	395.263
cnt7	Red						cnt7	Red								cnt7	Red						cnt7	Red						cnt7	Red						cnt7	Red						cnt7	Red
12	207.403	278.636	227.983				12	243.7	266.218	227.321						12	205.95	279.472	228.038				6		#DIV/0!	#DIV/0!				12	278.453	322.261	270.264				11	139.87	188.535	147.226				13	487.947	446.41	411.812
13	302.183						13	293.3								13	314.117						7							13	351.423						12	194.043						14	497.703
14	326.323						14	261.653								14	318.35						8							14	336.907						13	231.693						15	353.58
	Green							Green									Green							Green							Green							Green							Green
12	280.233	316.372	146.645				12	328.84	342.931	141.032						12	353.753	410.943	217.828				6		#DIV/0!	#DIV/0!				12	339.22	381.248	203.878				11	231.633	270.38	117.269				13	491.393	498.245	317.755
13	344.073						13	361.49								13	428.463						7							13	386.663						12	291.707						14	502.87
14	324.81						14	338.463								14	450.613						8							14	417.86						13	287.8						15	500.473
cnt8	Red						cnt8	Red								cnt8	Red						cnt8	Red						cnt8	Red						cnt8	Red						cnt8	Red
10	228.947	233.177	182.524				9	251.013	250.426	211.529						10	301.13	310.032	258.597				5		#DIV/0!	#DIV/0!				10	273.553	280.567	228.57				10	281.287	297.501	256.192				11	389.593	379.135	344.537
11	273.13						10	270.193								11	327.023						6							11	296.657						11	302.857						12	409.673
12	197.453						11	230.073								12	301.943						7							12	271.49						12	308.36						13	338.14
	Green							Green									Green							Green							Green							Green							Green
10	254.843	242.108	72.3804				9	270.527	278.155	76.2555						10	349.413	339.455	146.341				5		#DIV/0!	#DIV/0!				10	278.21	297.716	120.346				10	248.633	259.288	106.177				11	361.28	373.897	193.407
11	242.347						10	284.457								11	343.98						6							11	303.557						11	259.61						12	362.503
12	229.133						11	279.48								12	324.973						7							12	311.38						12	269.62						13	397.907
cnt9	Red						cnt9	Red								cnt9	Red						cnt9	Red						cnt9	Red						cnt9	Red						cnt9	Red
12	323.513	327.131	276.478				11	248.347	281.053	242.156						12	197.497	213.181	161.747				5		#DIV/0!	#DIV/0!				12	242.027	237.604	185.608				11	201.24	253.806	212.496				12	307.68	300.296	265.698
13	349.48						12	313.19								13	244.75						6							13	257.473						12	270.827						13	318.457
14	308.4						13	281.623								14	197.297						7							14	213.313						13	289.35						14	274.75
	Green							Green									Green							Green							Green							Green							Green
12	429.473	443.351	273.624				11	417.683	437.922	236.023						12	479.453	489.761	296.646				5		#DIV/0!	#DIV/0!				12	480.4	515.047	337.677				11	385.813	404.031	250.92				12	490.85	532.527	352.037
13	452.83						12	417.62								13	469.67						6							13	522.543						12	418.6						13	542.627
14	447.75						13	478.463								14	520.16						7							14	542.197						13	407.68						14	564.103
cnt10	Red						cnt10	Red								cnt10	Red						cnt10	Red						cnt10	Red						cnt10	Red						cnt10	Red
	Green							Green									Green							Green							Green							Green							Green
[truncated: 34 more columns]

## Sheet: s8_20A
	Baseline1							Baseline2									Bleach0							Bleach2							Bleach5							Bleach10							Bleach20
Sp1	Red	AVG	AVG-Bg	Norm B	Norm CNT	Norm 0		Red	AVG	AVG-Bg	Norm B	Norm CNT	Norm 0		Baseline T		Red	AVG	AVG-Bg	Norm B	Norm CNT	Norm 0		Red	AVG	AVG-Bg	Norm B	Norm CNT	Norm 0		Red	AVG	AVG-Bg	Norm B	Norm CNT	Norm 0		Red	AVG	AVG-Bg	Norm B	Norm CNT	Norm 0		Red	AVG	AVG-Bg	Norm B	Norm CNT
8	379.456	345.951	308.503	1.02567	0.993224	0.989863	7	232.08	305.663	293.062	0.974331	1.00723	1.01082		300.783	7	306.365	348.366	287.547	0.955995	0.961385	0.942231	4		#DIV/0!	#DIV/0!	#DIV/0!	#DIV/0!	#DIV/0!	7	377.303	336.187	301.22	1.00145	1.04287	1.06414	7	304.832	328.942	293.405	0.975471	0.983116	0.974742	7	317.131	363.062	307.092	1.02098	0.860499
9	386.682						8	354								8	400.321						5							8	375.077						8	365.011						8	422.73
10	271.715						9	330.909								9	338.412						6							9	256.182						9	316.982						9	349.325
	Green							Green									Green							Green							Green							Green							Green
8	312.763	298.469	208.26	1.0012	1.01427	1.02135	7	286.252	314.605	207.763	0.998804	0.98609	0.979189		208.011	7	175.062	177.352	77.1379	0.370835	0.331565	0	4		#DIV/0!	#DIV/0!	#DIV/0!	#DIV/0!	#DIV/0!	7	206.617	189.966	97.5016	0.468732	0.453984	0.183143	7	182.898	180.507	101.015	0.485624	0.512553	0.270764	7	231.515	207.192	92.0926	0.442728	0.396472
9	308.639						8	334.423								8	179.241						5							8	202.518						8	180.869						8	205.744
10	274.004						9	323.139								9	177.752						6							9	160.763						9	177.756						9	184.317
Sp2	Red							Red									Red							Red							Red							Red							Red
9	186.422	220.253	182.805	1.07963	1.04547	1.09256	9	142.48	168.441	155.84	0.920375	0.951455	0.901193		169.323	9	296.266	304.712	243.893	1.4404	1.44853	1.91291	5		#DIV/0!	#DIV/0!	#DIV/0!	#DIV/0!	#DIV/0!	9	274.367	269.508	234.541	1.38517	1.44246	1.90057	9	175.148	184.923	149.386	0.882256	0.889171	0.774423	9	201.875	214.165	158.196	0.934285	0.787433
10	237.84						10	197.27								10	327.719						6							10	300.219						10	199.617						10	232.203
11	236.496						11	165.574								11	290.152						7							11	233.938						11	180.004						11	208.418
	Green							Green									Green							Green							Green							Green							Green
9	253.449	269.674	179.466	0.943913	0.956243	0.910939	9	305.773	307.635	200.793	1.05609	1.04264	1.08679		190.13	9	189.816	208.385	108.172	0.568936	0.508688	0	5		#DIV/0!	#DIV/0!	#DIV/0!	#DIV/0!	#DIV/0!	9	231.359	248.076	155.611	0.818447	0.792696	0.57806	9	220.426	211.475	131.983	0.694175	0.732668	0.455882	9	230.887	226.613	111.514	0.586514	0.525234
10	276.59						10	325.348								10	206.703						6							10	245.688						10	218.316						10	218.641
11	278.984						11	291.785								11	228.637						7							11	267.18						11	195.684						11	230.312
Sp3	Red							Red									Red							Red							Red							Red							Red
7	232.367	241.181	203.733	1.03871	1.00585	1.01798	7	194.988	201.15	188.549	0.961291	0.993753	0.980804		196.141	7	245.281	233.306	172.487	0.879401	0.88436	0.644638	3		#DIV/0!	#DIV/0!	#DIV/0!	#DIV/0!	#DIV/0!	7	250.367	246.063	211.095	1.07624	1.12076	1.37108	7	232.805	242.419	206.882	1.05476	1.06303	1.19369	7	301.699	285.228	229.258	1.16884	0.985125
8	263.809						8	216.32								8	252.949						4							8	264.137						8	257.98						8	298.555
9	227.367						9	192.141								9	201.688						5							9	223.684						9	236.473						9	255.43
	Green							Green									Green							Green							Green							Green							Green
7	204.781	239.18	148.971	1.00864	1.02181	1.06703	7	246.121	253.262	146.42	0.991363	0.978743	0.934676		147.695	7	214.812	211.647	111.433	0.754481	0.674585	0	3		#DIV/0!	#DIV/0!	#DIV/0!	#DIV/0!	#DIV/0!	7	212.457	209.314	116.849	0.791151	0.766258	0.281713	7	188.887	183.965	104.473	0.707354	0.746578	0.221234	7	235.93	224.09	108.99	0.737939	0.660838
8	246.191						8	251.766								8	223.391						4							8	211.402						8	195.574						8	224.644
9	266.566						9	261.898								9	196.738						5							9	204.082						9	167.434						9	211.695
Sp4	Red							Red									Red							Red							Red							Red							Red
8	335.848	295.772	258.325	1.04852	1.01535	1.03404	7	213.578	247.017	234.416	0.951477	0.983608	0.963664		246.37	7	311.91	348.689	287.87	1.16844	1.17503	1.38799	3		#DIV/0!	#DIV/0!	#DIV/0!	#DIV/0!	#DIV/0!	7	382.645	346.611	311.644	1.26494	1.31726	1.70326	7	296.672	318.358	282.821	1.14795	1.15695	1.34791	7	296.758	352.142	296.172	1.20214	1.01319
9	323.141						8	277.402								8	394.848						4							8	396.305						8	357.023						8	397.398
10	228.328						9	250.07								9	339.309						5							9	260.883						9	301.379						9	362.27
	Green							Green									Green							Green							Green							Green							Green
8	343.359	334.431	244.222	0.994643	1.00764	1.01692	7	326.352	353.695	246.853	1.00536	0.992559	0.983506		245.538	7	252.453	250.945	150.732	0.613883	0.548875	0	3		#DIV/0!	#DIV/0!	#DIV/0!	#DIV/0!	#DIV/0!	7	229.285	226.053	133.589	0.544067	0.526948	-0.048605	7	210.906	195.256	115.765	0.471473	0.497617	-0.113623	7	274.746	268.055	152.955	0.622939	0.557853
9	355.914						8	367.441								8	260.281						4							8	236.734						8	198.981						8	275.019
10	304.02						9	367.293								9	240.102						5							9	212.141						9	175.883						9	254.398
Sp5	Red							Red									Red							Red							Red							Red							Red
8	166.992	202.337	164.889	1.08914	1.05469	1.11291	8	121.066	150.5	137.899	0.91086	0.941619	0.879464		151.394	8	233.559	235.382	174.562	1.15303	1.15953	1.32938	4		#DIV/0!	#DIV/0!	#DIV/0!	#DIV/0!	#DIV/0!	8	247.723	322.384	287.417	1.89847	1.97699	3.01715	8	260.289	275.029	239.492	1.58191	1.59431	2.22704	8	229.215	275.776	219.806	1.45188	1.22367
9	225.621						9	174.715								9	260.898						5							9	383.945						9	311.746						9	308.039
10	214.398						10	155.719								10	211.688						6							10	335.484						10	253.051						10	290.074
	Green							Green									Green							Green							Green							Green							Green
8	247.922	256.342	166.134	0.938381	0.950639	0.898086	8	294.59	294.794	187.952	1.06162	1.0481	1.09932		177.043	8	192.133	202.32	102.107	0.576733	0.515659	0	4		#DIV/0!	#DIV/0!	#DIV/0!	#DIV/0!	#DIV/0!	8	257.992	244.358	151.894	0.857947	0.830953	0.650976	8	216.441	214.286	134.795	0.761366	0.803585	0.594469	8	234.461	250.324	135.225	0.763795	0.683993
9	254.113						9	301.738								9	197.344						5							9	225.215						9	211.43						9	251.184
10	266.992						10	288.055								10	217.484						6							10	249.867						10	214.988						10	265.328
Sp6	Red							Red									Red							Red							Red							Red							Red
8	233.867	239.012	201.564	1.1008	1.06598	1.12931	8	188.875	177.25	164.649	0.899198	0.929563	0.861959		183.106	8	202.492	202.667	141.847	0.774671	0.779039	0.566965	5		#DIV/0!	#DIV/0!	#DIV/0!	#DIV/0!	#DIV/0!	7	144.941	162.236	127.268	0.695052	0.723798	0.458705	7	206.336	225.005	189.468	1.03474	1.04285	1.08399	8	263.133	247.986	192.016	1.04866	0.88383
9	244.457						9	179.117								9	202.644						6							8	177.633						8	249.965						9	258.184
10	238.711						10	163.758								10	202.863						7							9	164.133						9	218.715						10	222.641
	Green							Green									Green							Green							Green							Green							Green
8	373.348	384.646	294.437	0.960833	0.973384	0.947839	8	442.215	425.284	318.442	1.03917	1.02594	1.05083		306.44	8	253.469	268.064	167.85	0.547743	0.489739	0	5		#DIV/0!	#DIV/0!	#DIV/0!	#DIV/0!	#DIV/0!	7	298.742	285.872	193.408	0.631145	0.611287	0.238207	7	297.805	279.694	200.202	0.653316	0.689544	0.391573	8	349.73	321.663	206.563	0.674074	0.603646
9	389.07						9	426.328								9	263.664						6							8	294.137						8	288.562						9	315.832
10	391.52						10	407.309								10	287.059						7							9	264.738						9	252.715						10	299.426
Sp7	Red							Red									Red							Red							Red							Red							Red
8	261.984	313.89	276.443	1.14043	1.10435	1.19939	8	175.34	220.965	208.364	0.859575	0.888602	0.787144		242.403	9	227.523	220.116	159.296	0.657154	0.66086	0.351983	4		#DIV/0!	#DIV/0!	#DIV/0!	#DIV/0!	#DIV/0!	9	284.324	335.141	300.173	1.23832	1.28954	1.55324	9	278.852	261.938	226.401	0.933984	0.941305	0.887847	9	349.352	336.422	280.452	1.15697	0.975114
9	345.898						9	243.574								10	237.797						5							10	371.969						10	287.676						10	352.508
10	333.789						10	243.98								11	195.027						6							11	349.129						11	219.285						11	307.406
	Green							Green									Green							Green							Green							Green							Green
8	432.305	443.12	352.911	1.05062	1.06435	1.12295	8	417.215	425.745	318.903	0.949378	0.937293	0.880181		335.907	9	268.574	279.287	179.073	0.533103	0.476649	0	4		#DIV/0!	#DIV/0!	#DIV/0!	#DIV/0!	#DIV/0!	9	303.012	309.883	217.419	0.647259	0.626893	0.287081	9	282.727	276.656	197.164	0.586961	0.619509	0.272971	9	341.066	332.658	217.558	0.647673	0.580004
9	466.863						9	440.312								10	288.02						5							10	322.961						10	277.664						10	328.723
10	430.191						10	419.707								11	281.266						6							11	303.676						11	269.578						11	328.184
Sp8	Red							Red									Red							Red							Red							Red							Red
9	147.672	152.359	114.912	1.06758	1.03381	1.0619	9	119.906	112.965	100.364	0.932423	0.96391	0.933917		107.638	8	113.828	125.668	64.8485	0.60247	0.605867	0.278319	3		#DIV/0!	#DIV/0!	#DIV/0!	#DIV/0!	#DIV/0!	9	119.352	118.887	83.9195	0.779648	0.811893	0.655565	8	126.652	160.096	124.559	1.15721	1.16628	1.30446	8	181.484	182.464	126.494	1.17518	0.990465
10	165.164						10	122.93								9	136.648						4							10	133.121						9	180.77						9	204.016
11	144.242						11	96.059								10	126.527						5							11	104.188						10	172.867						10	161.891
	Green							Green									Green							Green							Green							Green							Green
9	259.387	256.967	166.759	0.982914	0.995754	0.992225	9	247.312	279.398	172.556	1.01709	1.00414	1.00758		169.658	8	180.469	186.336	86.1222	0.507624	0.453868	0	3		#DIV/0!	#DIV/0!	#DIV/0!	#DIV/0!	#DIV/0!	9	180.227	178.176	85.7114	0.505202	0.489306	0.0648895	8	164.227	178.923	99.4313	0.58607	0.618568	0.301576	8	251.211	265.904	150.804	0.888873	0.796002
10	260.172						10	273.531								9	189.34						4							10	179.769						9	187.328						9	274.305
11	251.344						11	317.352								10	189.199						5							11	174.531						10	185.215						10	272.195
Sp9	Red							Red									Red							Red							Red							Red							Red
9	161.336	206.982	169.534	1.07361	1.03965	1.0608	10	172.922	158.888	146.287	0.926392	0.957675	0.935095		157.91	9	171.953	183.443	122.623	0.776537	0.780915	0.664036	3		#DIV/0!	#DIV/0!	#DIV/0!	#DIV/0!	#DIV/0!	10	167.637	171.264	136.297	0.863129	0.898827	0.844853	9	187.332	200.322	164.785	1.04353	1.05171	1.0793	9	316.441	321.897	265.927	1.68404	1.41934
10	228.582						11	179.59								10	197.012						4							11	181.172						10	219.211						10	345.023
11	231.027						12	124.152								11	181.363						5							12	164.984						11	194.422						11	304.227
	Green							Green									Green							Green							Green							Green							Green
9	234.598	257.419	167.211	0.93939	0.95166	0.925872	10	319.969	295.63	188.788	1.06061	1.04711	1.07224		177.999	9	156.117	169.473	69.259	0.389097	0.347893	0	3		#DIV/0!	#DIV/0!	#DIV/0!	#DIV/0!	#DIV/0!	10	204.578	184.152	91.6879	0.515102	0.498896	0.231561	9	158.09	173.206	93.7138	0.526484	0.555678	0.318637	9	255.195	239.366	124.266	0.698127	0.625186
10	276.711						11	306.312								10	169.062						4							11	172.484						10	172.75						10	240.18
11	260.949						12	260.609								11	183.238						5							12	175.394						11	188.777						11	222.723
Sp10	Red							Red									Red							Red							Red							Red							Red
															#DIV/0!
	Green							Green									Green							Green							Green							Green							Green
															#DIV/0!
		AVG RED	1.03982	AVG GRN	0.992861				AVG RED	0.957491	AVG GRN	1.00696						AVG RED	0.939502	AVG GRN	0.483058				AVG RED	#DIV/0!	AVG GRN	#DIV/0!				AVG RED	1.18049	AVG GRN	0.621914				AVG RED	1.09875	AVG GRN	0.641811				AVG RED	1.01541	AVG GRN	0.603248
		AVG RED0	1.07764	AVG GRN0	0.989247				AVG RED0	0.917118	AVG GRN0	1.01048						AVG RED0	0.897607	AVG GRN0	0				AVG RED0	#DIV/0!	AVG GRN0	#DIV/0!				AVG RED0	1.39651	AVG GRN0	0.274114				AVG RED0	1.20816	AVG GRN0	0.301498				AVG RED0	1.01715	AVG GRN0	0.214267
bg1	Red	AVG	AVG Total				bg1	Red	AVG	AVG Total						bg1	Red	AVG	AVG Total				bg1	Red	AVG	AVG Total				bg1	Red	AVG	AVG Total				bg1	Red	AVG	AVG Total				bg1	Red	AVG	AVG Total
5	33.2578	30.2624	37.4477				5	7.46484	8.40104	12.6011						5	49.5859	51.5456	60.8194				3		#DIV/0!	#DIV/0!				5	31.2656	28.0781	34.9672				5	32.0234	30.5599	35.5371				5	48.7305	49.5312	55.9698
6	34.0977						6	8.90234								6	53.8047						4							6	27.457						6	31.8867						6	51.9609
7	28.4219						7	8.28906								7	54.0977						5							7	24.8789						7	30.9609						7	48.8359
8	29.8633						8	6.80469								8	49.8242						6							8	28.5117						8	31.4961						8	49.9844
9	29.2227						9	9.39453								9	50.4531						7							9	29.2344						9	30.0547						9	50.4141
10	26.7109						10	9.55078								10	51.5078						8							10	27.1211						10	26.9375						10	47.2617
	Green							Green									Green							Green							Green							Green							Green
5	77.4609	76.7773	90.2086				5	91.4531	89.36	106.842						5	79.8281	83.2494	100.214				3		#DIV/0!	#DIV/0!				5	82.6914	73.5313	92.4644				5	73.3477	67.5273	79.4919				5	89.9414	91.3138	115.1
6	85.3047						6	86.1562								6	97.2227						4							6	74.625						6	65.2852						6	91.4805
7	72.7305						7	91.4297								7	92.8828						5							7	60.9688						7	56.5898						7	100.043
8	82.5195						8	86.6523								8	76.6016						6							8	85.1367						8	60.6641						8	100.387
9	77.543						9	84.0156								9	80.3438						7							9	75.0469						9	75.4961						9	86.418
10	65.1055						10	96.4531								10	72.6172						8							10	62.7188						10	73.7812						10	79.6133
bg2	Red						bg2	Red								bg2	Red						bg2	Red						bg2	Red						bg2	Red						bg2	Red
5	43.7773	43.1452					5	17.5703	16.0521							5	63.3086	63.7773					3		#DIV/0!					5	38.6953	37.2292					5	40.5859	37.9258					5	54.9648	57.11
6	40.0781						6	17.0977								6	65.5586						4							6	37.6172						6	37.7656						6	56.5273
7	46.4531						7	16.9805								7	60.1445						5							7	36.0156						7	38.1758						7	58.2812
8	40.9883						8	13.168								8	60.3398						6							8	36.3438						8	37.6797						8	55.5508
9	44.5938						9	12.9531								9	64.4531						7							9	35.7578						9	35.5977						9	55.9922
10	42.9805						10	18.543								10	68.8594						8							10	38.9453						10	37.75						10	61.3438
	Green							Green									Green							Green							Green							Green							Green
5	123.805	111.958					5	146.484	135.388							5	133.312	132.952					3		#DIV/0!					5	124.852	114.416					5	110.863	96.3612					5	150.059	149.149
6	109.578						6	136.277								6	132.277						4							6	109.844						6	105.262						6	138.551
7	110.012						7	124.285								7	136.961						5							7	113.457						7	78.383						7	140.598
8	111.941						8	126.75								8	139.176						6							8	108.863						8	85.441						8	144.812
9	101.254						9	134.344								9	122.273						7							9	112.73						9	92.812						9	139.969
10	115.16						10	144.188								10	133.711						8							10	116.75						10	105.406						10	180.902
bg3	Red						bg3	Red								bg3	Red						bg3	Red						bg3	Red						bg3	Red						bg3	Red
5	42.1953	38.9355					5	15.1367	13.3503							5	69.7852	67.1354					3		#DIV/0!					5	40.4258	39.5944					5	38.3359	38.1257					5	66.7773	61.2682
6	42.3008						6	12.6016								6	65.8281						4							6	39.9102						6	35.8203						6	64.9531
7	38.418						7	13.6758								7	67						5							7	38.1953						7	38.4219						7	58.1719
8	36.1133						8	11.8984								8	65.5						6							8	38.1406						8	38.4961						8	58.3711
9	38.7461						9	12.2148								9	66.5312						7							9	42.1719						9	38.332						9	62.6953
10	35.8398						10	14.5742								10	68.168						8							10	38.7227						10	39.3477						10	56.6406
	Green							Green									Green							Green							Green							Green							Green
5	94.8945	81.89					5	101.543	95.778							5	88.3047	84.4401					3		#DIV/0!					5	89.1094	89.446					5	67.1289	74.5872					5	109.129	104.837
6	86.2305						6	97.668								6	77.9648						4							6	86.9258						6	71.8125						6	103.359
7	77.7773						7	94.8281								7	75.4023						5							7	88.5195						7	68.9023						7	98.0352
8	85.3672						8	86.0703								8	82.5						6							8	88.2656						8	70.7578						8	112.856
9	74.1953						9	94.3867								9	87.6211						7							9	86.7422						9	76.3867						9	109.996
10	72.875						10	100.172								10	94.8477						8							10	97.1133						10	92.5352						10	95.6445
	Baseline1							Baseline2									Bleach0							Bleach2							Bleach5							Bleach10							Bleach15
cnt1	Red	AVG	AVG-Bg	AVG total	Norm B		cnt1	Red	AVG	AVG-Bg	AVG total	Norm B			Baseline T	cnt1	Red	AVG	AVG-Bg	AVG total	Norm B		cnt1	Red	AVG	AVG-Bg	AVG total	Norm B		cnt1	Red	AVG	AVG-Bg	AVG total	Norm B		cnt1	Red	AVG	AVG-Bg	AVG total	Norm B		cnt1	Red	AVG	AVG-Bg	AVG total	Norm B
9	280.824	319.815	282.367	245.228	1.03267		9	258.008	300.892	288.291	229.713	0.967334			237.471	9	327.531	326.108	265.289	236.139	0.994393		6		#DIV/0!	#DIV/0!	#DIV/0!	#DIV/0!		10	290.523	286.817	251.85	228.039	0.960284		9	320.758	310.943	275.406	235.624	0.992223		9	387.062	426.134	370.164	281.758	1.18649
10	352.496						10	335.289								10	361.188						7							11	327.074						10	348.449						10	473.172
11	326.125						11	309.379								11	289.605						8							12	242.855						11	263.621						11	418.168
	Green							Green									Green							Green							Green							Green							Green
9	302.938	311.259	221.051	219.954	0.987106		9	366.984	351.167	244.325	225.7	1.01289			222.827	9	358.441	330.672	230.458	249.218	1.11844		6		#DIV/0!	#DIV/0!	#DIV/0!	#DIV/0!		10	281.656	279.185	186.72	230.065	1.03249		9	285.164	283.582	204.09	211.12	0.947462		9	418.227	399.534	284.434	248.824	1.11667
10	324.082						10	360.988								10	330.379						7							11	290.324						10	294.277						10	428.219
11	306.758						11	325.527								11	303.195						8							12	265.574						11	271.305						11	352.156
cnt2	Red						cnt2	Red								cnt2	Red						cnt2	Red						cnt2	Red						cnt2	Red						cnt2	Red
10	159.984	195.135	157.688				10	136.66	157.442	144.841						10	179.867	194.724	133.905				4		#DIV/0!	#DIV/0!				11	168.762	162.724	127.757				10	171.184	181.359	145.822				10	236.277	241.11	185.141
11	215.621						11	182.312								11	214.207						5							12	175.727						11	222.23						11	260.777
12	209.801						12	153.355								12	190.098						6							13	143.684						12	150.664						12	226.277
	Green							Green									Green							Green							Green							Green							Green
10	284.648	303.66	213.452				10	330.277	354.799	247.957						10	343.379	367.962	267.749				4		#DIV/0!	#DIV/0!				11	324.055	333.969	241.504				10	287.918	299.27	219.778				10	376.066	379.772	264.672
11	310.453						11	374.285								11	392.473						5							12	351.156						11	313.891						11	389.801
12	315.879						12	359.836								12	368.035						6							13	326.695						12	296						12	373.449
cnt3	Red						cnt3	Red								cnt3	Red						cnt3	Red						cnt3	Red						cnt3	Red						cnt3	Red
9	160.691	193.784	156.336				9	131.93	151.612	139.011						9	153.641	162.694	101.875				4		#DIV/0!	#DIV/0!				9	154.988	177.428	142.461				9	179.23	178.642	143.105				8	178.434	210.518	154.549
10	206.594						10	168.461								10	173.098						5							10	194.555						10	190.137						9	234.543
11	214.066						11	154.445								11	161.344						6							11	182.742						11	166.559						10	218.578
	Green							Green									Green							Green							Green							Green							Green
9	340.75	356.763	266.554				9	384.883	394.279	287.437						9	400.008	394.835	294.621				4		#DIV/0!	#DIV/0!				9	364.371	335.577	243.112				9	299.172	308.237	228.745				8	408.637	417.882	302.782
10	370.73						10	403.676								10	389.98						5							10	327.816						10	304.797						9	420.719
11	358.809						8									11	394.516						6							11	314.543						11	320.742						10	424.289
cnt4	Red						cnt4	Red								cnt4	Red						cnt4	Red						cnt4	Red						cnt4	Red						cnt4	Red
9	196.688	190.229	152.782				9	139.863	125.066	112.465						9	241.871	217.293	156.474				5		#DIV/0!	#DIV/0!				9	160.43	162.117	127.15				8	138.785	167.771	132.234				8	165.672	197.613	141.644
10	211.312						10	143.402								10	234.117						6							10	177.434						9	191.543						9	220.066
11	162.688						11	91.934								11	175.891						7							11	148.488						10	172.984						10	207.102
	Green							Green									Green							Green							Green							Green							Green
9	371.492	366.676	276.467				9	335.906	342.944	236.102						9	379.359	385.005	284.791				5		#DIV/0!	#DIV/0!				9	368.457	382.556	290.092				8	340.758	327.168	247.676				8	369.422	369.625	254.525
10	372.223						10	349.82								10	398.355						6							10	400.418						9	334.43						9	370.801
11	356.312						11	343.105								11	377.301						7							11	378.793						10	306.316						10	368.652
cnt5	Red						cnt5	Red								cnt5	Red						cnt5	Red						cnt5	Red						cnt5	Red						cnt5	Red
9	192.898	197.312	159.865				9	152.285	141.319	128.718						9	184.594	175.986	115.166				5		#DIV/0!	#DIV/0!				8	136.199	146.802	111.835				8	138.633	155.339	119.801				8	171.73	183.643	127.673
10	215.133						10	156.777								10	185.352						6							9	157.68						9	169.566						9	195.449
11	183.906						11	114.895								11	158.012						7							10	146.527						10	157.816						10	183.75
	Green							Green									Green							Green							Green							Green							Green
9	276.207	274.529	184.32				9	297.117	283.621	176.779						9	329.703	332.352	232.138				5		#DIV/0!	#DIV/0!				8	320.414	305.34	212.875				8	303.102	288.711	209.219				8	308.332	294.996	179.896
10	261.766						10	286.879								10	344.644						6							9	319.105						9	296.172						9	301.066
11	285.613						11	266.867								11	322.707						7							10	276.5						10	266.859						10	275.59
cnt6	Red						cnt6	Red								cnt6	Red						cnt6	Red						cnt6	Red						cnt6	Red						cnt6	Red
9	200.891	283.447	245.999				9	171.055	222.803	210.202						9	241.402	285.058	224.239				7		#DIV/0!	#DIV/0!				9	264.68	323.804	288.836				9	233.852	289.149	253.612				9	305.305	350.38	294.411
10	302.945						10	259.402								10	312.496						8							10	334.602						10	301.574						10	379.715
11	346.504						11	237.953								11	301.277						9							11	372.129						11	332.02						11	366.121
	Green							Green									Green							Green							Green							Green							Green
9	246.856	255.76	165.552				9	257.496	279.329	172.487						9	277.062	279.874	179.66				7		#DIV/0!	#DIV/0!				9	279.519	272.075	179.611				9	235.148	256.525	177.033				9	306.898	309.215	194.115
10	242.305						10	298.504								10	288.137						8							10	278.434						10	271.398						10	307.172
11	278.121						11	281.988								11	274.422						9							11	258.273						11	263.027						11	313.574
cnt7	Red						cnt7	Red								cnt7	Red						cnt7	Red						cnt7	Red						cnt7	Red						cnt7	Red
3	377.426	425.405	387.957				3	315.07	383.84	371.239						3	330.402	351.084	290.265				6		#DIV/0!	#DIV/0!				2	368.434	451.555	416.588				3	471.32	504.005	468.468				3	522.969	557.104	501.135
4	471.18						4	435.277								4	376.078						7							3	508.129						4	570.438						4	628.09
5	427.609						5	401.172								5	346.773						8							4	478.102						5	470.258						5	520.254
	Green							Green									Green							Green							Green							Green							Green
3	360.34	346.679	256.47				3	395.441	388.819	281.977						3	412.645	407.09	306.876				6		#DIV/0!	#DIV/0!				2	436.66	428.957	336.493				3	376.742	372.552	293.06				3	503.891	472.801	357.701
4	349.438						4	397.832								4	402.316						7							3	430.375						4	392.609						4	481.051
5	330.258						5	373.184								5	406.309						8							4	419.836						5	348.305						5	433.461
cnt8	Red						cnt8	Red								cnt8	Red						cnt8	Red						cnt8	Red						cnt8	Red						cnt8	Red
9	417.25	455.958	418.511				9	486.895	463.498	450.897						8	506.617	652.21	591.39				5		#DIV/0!	#DIV/0!				9	464.523	411.98	377.013				9	393.039	407.298	371.761				9	525.926	543.819	487.849
10	510.801						10	525.711								9	728.711						6							10	437.691						10	436.492						10	601.719
11	439.824						11	377.887								10	721.301						7							11	333.727						11	392.363						11	503.812
	Green							Green									Green							Green							Green							Green							Green
9	257.266	254.727	164.518				9	267.844	279.022	172.18						8	306.875	319.326	219.112				5		#DIV/0!	#DIV/0!				9	239.121	240.756	148.292				9	198.008	198.846	119.354				9	278.945	280.012	164.912
10	268.215						10	294.867								9	332.133						6							10	253.781						10	202.945						10	292.231
11	238.699						11	274.355								10	318.969						7							11	229.367						11	195.586						11	268.859
cnt9	Red						cnt9	Red								cnt9	Red						cnt9	Red						cnt9	Red						cnt9	Red						cnt9	Red
3	242.027	282.996	245.548				3	209.203	234.359	221.758						3	316.59	307.471	246.652				5		#DIV/0!	#DIV/0!				2	213.398	243.83	208.863				3	233.121	245.944	210.407				3	318.758	329.224	273.254
4	314.359						4	263.18								4	337.676						6							3	251.652						4	271.258						4	364.359
5	292.602						5	230.695								5	268.148						7							4	266.441						5	233.453						5	304.555
	Green							Green									Green							Green							Green							Green							Green
3	330.969	321.406	231.198				3	321.582	318.896	212.054						3	340.062	327.77	227.556				5		#DIV/0!	#DIV/0!				2	323.395	324.353	231.889				3	289.047	280.615	201.123				3	351.066	351.477	236.377
4	334.465						4	306.871								4	322.824						6							3	337.652						4	272.934						4	352.613
5	298.785						5	328.234								5	320.422						7							4	312.012						5	279.863						5	350.75
cnt10	Red						cnt10	Red								cnt10	Red						cnt10	Red						cnt10	Red						cnt10	Red						cnt10	Red
	Green							Green									Green							Green							Green							Green							Green
[truncated: 34 more columns]

## Sheet: s1_20B
	Baseline1							Baseline2									Bleach0							Bleach2							Bleach5							Bleach10							Bleach20
Sp1	Red	AVG	AVG-Bg	Norm B	Norm CNT	Norm 0		Red	AVG	AVG-Bg	Norm B	Norm CNT	Norm 0		Baseline T		Red	AVG	AVG-Bg	Norm B	Norm CNT	Norm 0		Red	AVG	AVG-Bg	Norm B	Norm CNT	Norm 0		Red	AVG	AVG-Bg	Norm B	Norm CNT	Norm 0		Red	AVG	AVG-Bg	Norm B	Norm CNT	Norm 0		Red	AVG	AVG-Bg	Norm B	Norm CNT
9	441.699	430.245	387.014	0.959194	0.973419	0.942763	9	472.399	459.99	419.942	1.04081	1.02582	1.05559		403.478	9	352.726	342.551	261.883	0.649063	0.82643	0.626251	4		#DIV/0!	#DIV/0!	#DIV/0!	#DIV/0!	#DIV/0!	8	464.315	491.264	361.987	0.897167	0.938098	0.866707	8	365.702	437.455	322.746	0.799909	0.676785	0.304021	8	416.716	466.389	414.67	1.02774	0.81989
10	434.817						10	473.528								10	356.46						5							9	520.787						9	478.738						9	498.002
11	414.218						11	434.042								11	318.467						6							10	488.689						10	467.924						10	484.45
	Green							Green									Green							Green							Green							Green							Green
9	295.477	304.392	204.084	0.970623	0.976918	0.950297	9	335.802	330.82	216.437	1.02938	1.02279	1.04907		210.261	9	192.57	196.517	110.221	0.524212	0.535597	0	4		#DIV/0!	#DIV/0!	#DIV/0!	#DIV/0!	#DIV/0!	8	196.029	214.532	127.864	0.608122	0.601738	0.142422	8	266.765	285.514	144.645	0.687934	0.602303	0.143639	8	311.252	326.336	205.672	0.978177	0.763869
10	317.548						10	340.663								10	200.958						5							9	232.086						9	296.12						9	341.049
11	300.152						11	315.995								11	196.022						6							10	215.482						10	293.658						10	326.707
Sp2	Red							Red									Red							Red							Red							Red							Red
8	261.563	242.572	199.341	1.01285	1.02787	1.04254	7	219.088	234.331	194.284	0.987153	0.972935	0.958689		196.812	7	144.326	140.322	59.6532	0.303097	0.385923	0.0626973	5		#DIV/0!	#DIV/0!	#DIV/0!	#DIV/0!	#DIV/0!	5		#DIV/0!	#DIV/0!	#DIV/0!	#DIV/0!	#DIV/0!	150		#DIV/0!	#DIV/0!	#DIV/0!	#DIV/0!	#DIV/0!	5		#DIV/0!	#DIV/0!	#DIV/0!	#DIV/0!
9	254.496						8	250.372								8	145.355						6							6							180							6
10	211.657						9	233.534								9	131.285						7							7							210							7
	Green							Green									Green							Green							Green							Green							Green
8	598.466	532.348	432.039	0.993709	1.00015	1.00023	7	568.053	551.892	437.51	1.00629	0.999849	0.999769		434.775	7	241.733	233.039	146.744	0.337516	0.344846	0	5		#DIV/0!	#DIV/0!	#DIV/0!	#DIV/0!	#DIV/0!	5		#DIV/0!	#DIV/0!	#DIV/0!	#DIV/0!	#DIV/0!	150		#DIV/0!	#DIV/0!	#DIV/0!	#DIV/0!	#DIV/0!	5		#DIV/0!	#DIV/0!	#DIV/0!	#DIV/0!
9	564.343						8	575.208								8	247.701						6							6							180							6
10	434.235						9	512.416								9	209.683						7							7							210							7
Sp3	Red							Red									Red							Red							Red							Red							Red
8	429.703	513.525	470.294	1.12067	1.13729	1.27164	8	385.047	409.061	369.014	0.879329	0.866664	0.736186		419.654	8	345.373	381.071	300.403	0.715835	0.911448	0.824794	3		#DIV/0!	#DIV/0!	#DIV/0!	#DIV/0!	#DIV/0!	8	356.267	448.186	318.909	0.759934	0.794604	0.593612	9	490.937	552.758	438.049	1.04383	0.883165	0.768834	8	257.38	277.303	225.584	0.537549	0.428835
9	562.294						9	460.163								9	421.677						4							9	480.017						10	597.623						9	302.733
10	548.577						10	381.973								10	376.163						5							10	508.273						11	569.713						10	271.797
	Green							Green									Green							Green							Green							Green							Green
8	453.526	436.732	336.423	0.987216	0.993618	0.987373	8	460.01	459.519	345.136	1.01278	1.0063	1.01247		340.78	8	239.42	251.257	164.961	0.48407	0.494583	0	3		#DIV/0!	#DIV/0!	#DIV/0!	#DIV/0!	#DIV/0!	8	265.523	286.438	199.77	0.586214	0.58006	0.169122	9	372.583	397.987	257.118	0.754499	0.660582	0.32844	8	332.323	346.197	225.533	0.661814	0.516818
9	425.437						9	453.073								9	245.053						4							9	290.057						10	402.64						9	354.827
10	431.232						10	465.473								10	269.297						5							10	303.733						11	418.737						10	351.44
Sp4	Red							Red									Red							Red							Red							Red							Red
7	275.71	330.584	287.353	1.00113	1.01598	1.13487	7	262.39	326.752	286.705	0.998871	0.984484	0.869018		287.029	8	572.233	526.431	445.763	1.55302	1.97741	9.25096	3		#DIV/0!	#DIV/0!	#DIV/0!	#DIV/0!	#DIV/0!	8	491.933	470.141	340.864	1.18756	1.24174	3.04069	7	468.677	494.665	379.956	1.32375	1.12	2.01298	6	225.67	289.111	237.392	0.827066	0.6598
8	366.173						8	370.24								9	595.113						4							9	515.81						8	544.907						7	321.48
9	349.87						9	347.627								10	411.947						5							10	402.68						9	470.41						8	320.183
	Green							Green									Green							Green							Green							Green							Green
7	417.907	386.957	286.648	1.04443	1.05121	1.43227	7	383.56	376.641	262.258	0.955567	0.949449	0.573267		274.453	8	321.357	323.094	236.799	0.862802	0.88154	0	3		#DIV/0!	#DIV/0!	#DIV/0!	#DIV/0!	#DIV/0!	8	244.213	251.381	164.713	0.600149	0.593849	-2.42859	7	349.587	335.787	194.918	0.710205	0.621802	-2.19262	6	325.66	332.633	211.969	0.772334	0.603123
8	388.703						8	387.38								9	342.633						4							9	259.553						8	355.217						7	356.04
9	354.26						9	358.983								10	305.293						5							10	250.377						9	302.557						8	316.2
Sp5	Red							Red									Red							Red							Red							Red							Red
6	352.383	331.635	288.404	1.01212	1.02713	1.06559	6	318.873	321.547	281.499	0.987884	0.973655	0.936296		284.952	6	198.04	186.378	105.709	0.370973	0.472347	-0.27592	4		#DIV/0!	#DIV/0!	#DIV/0!	#DIV/0!	#DIV/0!	5	253.163	292.732	163.455	0.573625	0.599795	0.032263	5	332.557	350.741	236.032	0.828324	0.700826	0.276567	5	301.003	302.901	251.182	0.881489	0.703217
7	362.373						7	347.51								7	195.92						5							6	324.963						6	402.037						6	338.477
8	280.15						8	298.257								8	165.173						6							7	300.07						7	317.63						7	269.223
	Green							Green									Green							Green							Green							Green							Green
6	323.36	321.924	221.616	0.969399	0.975685	0.941205	6	360.057	349.99	235.607	1.0306	1.024	1.05804		228.612	6	184.757	217.516	131.22	0.573987	0.586453	0	4		#DIV/0!	#DIV/0!	#DIV/0!	#DIV/0!	#DIV/0!	5	225.053	228.081	141.413	0.618572	0.612079	0.0619671	5	329.97	304.272	163.403	0.714763	0.625792	0.0951269	5	299.313	303.17	182.506	0.798324	0.623419
7	337.773						7	354.943								7	232.813						5							6	237.84						6	286.053						6	302.237
8	304.64						8	334.97								8	234.977						6							7	221.35						7	296.793						7	307.96
Sp6	Red							Red									Red							Red							Red							Red							Red
8	411.898	389.375	346.144	1.08303	1.0991	1.24783	7	308.694	333.114	293.067	0.916965	0.903758	0.759312		319.605	7	309.319	313.623	232.955	0.728883	0.928062	0.820094	5		#DIV/0!	#DIV/0!	#DIV/0!	#DIV/0!	#DIV/0!	8	592.787	553.207	423.93	1.32642	1.38693	1.96766	8	658.732	653.272	538.563	1.68509	1.42571	2.06465	8	515.542	571.455	519.736	1.62618	1.2973
9	416.495						8	354.88								8	344.12						6							9	583.097						9	690.287						9	610.847
10	339.731						9	335.769								9	287.431						7							10	483.736						10	610.796						10	587.977
	Green							Green									Green							Green							Green							Green							Green
8	306.819	302.725	202.416	1.03706	1.04378	1.1095	7	263.06	302.333	187.95	0.962942	0.956778	0.891907		195.183	7	206.944	200.943	114.647	0.587381	0.600138	0	5		#DIV/0!	#DIV/0!	#DIV/0!	#DIV/0!	#DIV/0!	8	309.245	294.977	208.308	1.06724	1.05604	1.14015	8	362.403	373.335	232.466	1.19101	1.04276	1.10694	8	336.852	366.477	245.813	1.25939	0.983474
9	290.648						8	316.833								8	201.657						6							9	304.12						9	364.606						9	379.958
10	310.708						9	327.106								9	194.227						7							10	271.565						10	392.995						10	382.62
Sp7	Red							Red									Red							Red							Red							Red							Red
7	297.354	299.602	256.371	1.05633	1.072	1.26507	7	274.042	269.075	229.028	0.943668	0.930077	0.742566		242.699	7	350.11	362.923	282.255	1.16298	1.48079	2.77009	4		#DIV/0!	#DIV/0!	#DIV/0!	#DIV/0!	#DIV/0!	8	494.896	464.65	335.373	1.38185	1.44489	2.63793	7	413.351	450.038	335.329	1.38167	1.169	1.62219	7	350.75	368.633	316.913	1.30579	1.04171
8	313.421						8	280.146								8	386.362						5							9	484.115						8	475.008						8	389.008
9	288.031						9	253.037								9	352.298						6							10	414.938						9	461.756						9	366.14
	Green							Green									Green							Green							Green							Green							Green
7	259.649	290.648	190.339	1.04194	1.0487	1.1793	7	287.27	289.397	175.015	0.958055	0.951922	0.822992		182.677	7	200.725	216.526	130.231	0.712901	0.728383	0	4		#DIV/0!	#DIV/0!	#DIV/0!	#DIV/0!	#DIV/0!	8	271.346	272.522	185.853	1.01739	1.00671	1.02469	7	290.64	321.958	181.089	0.991306	0.867912	0.513695	7	322.441	351.845	231.181	1.26552	0.988257
8	292.517						8	294.27								8	234.244						5							9	277.916						8	335.27						8	343.882
9	319.778						9	286.652								9	214.61						6							10	268.303						9	339.963						9	389.213
Sp8	Red							Red									Red							Red							Red							Red							Red
8	407.641	402.054	358.823	1.02009	1.03522	1.0612	8	357.616	384.734	344.687	0.979906	0.965793	0.940566		351.755	8	314.841	305.404	224.736	0.638898	0.813487	0.675942	3		#DIV/0!	#DIV/0!	#DIV/0!	#DIV/0!	#DIV/0!	8	408.638	426.589	297.313	0.845227	0.883788	0.798087	8	551.149	520.732	406.023	1.15428	0.97661	0.95936	8	483.943	488.154	436.435	1.24074	0.989811
9	415.143						9	409.768								9	326.803						4							9	446.533						9	549.797						9	510.422
10	383.378						10	386.819								10	274.568						5							10	424.597						10	461.251						10	470.098
	Green							Green									Green							Green							Green							Green							Green
8	327.527	352.129	251.82	0.981972	0.98834	0.979741	8	343.194	375.45	261.067	1.01803	1.01151	1.02		256.444	8	213.952	192.829	106.533	0.415425	0.424447	0	3		#DIV/0!	#DIV/0!	#DIV/0!	#DIV/0!	#DIV/0!	8	226.59	220.948	134.28	0.523624	0.518127	0.162765	8	302.781	319.701	178.832	0.697353	0.610549	0.323345	8	357.175	355.038	234.374	0.91394	0.713705
9	371.587						9	385.517								9	197.578						4							9	237.013						9	364.867						9	361.606
10	357.273						10	397.638								10	166.956						5							10	199.241						10	291.454						10	346.333
Sp9	Red							Red									Red							Red							Red							Red							Red
5		#DIV/0!	#DIV/0!	#DIV/0!	#DIV/0!	#DIV/0!	5		#DIV/0!	#DIV/0!	#DIV/0!	#DIV/0!	#DIV/0!		#DIV/0!	3		#DIV/0!	#DIV/0!	#DIV/0!	#DIV/0!	#DIV/0!	3		#DIV/0!	#DIV/0!	#DIV/0!	#DIV/0!	#DIV/0!	2		#DIV/0!	#DIV/0!	#DIV/0!	#DIV/0!	#DIV/0!	60		#DIV/0!	#DIV/0!	#DIV/0!	#DIV/0!	#DIV/0!	2		#DIV/0!	#DIV/0!	#DIV/0!	#DIV/0!
6							6									4							4							3							90							3
7							7									5							5							4							120							4
	Green							Green									Green							Green							Green							Green							Green
5		#DIV/0!	#DIV/0!	#DIV/0!	#DIV/0!	#DIV/0!	5		#DIV/0!	#DIV/0!	#DIV/0!	#DIV/0!	#DIV/0!		#DIV/0!	3		#DIV/0!	#DIV/0!	#DIV/0!	#DIV/0!	#DIV/0!	3		#DIV/0!	#DIV/0!	#DIV/0!	#DIV/0!	#DIV/0!	2		#DIV/0!	#DIV/0!	#DIV/0!	#DIV/0!	#DIV/0!	60		#DIV/0!	#DIV/0!	#DIV/0!	#DIV/0!	#DIV/0!	2		#DIV/0!	#DIV/0!	#DIV/0!	#DIV/0!
6							6									4							4							3							90							3
7							7									5							5							4							120							4
Sp10	Red							Red									Red							Red							Red							Red							Red
															#DIV/0!
	Green							Green									Green							Green							Green							Green							Green
															#DIV/0!
		AVG RED	#DIV/0!	AVG GRN	#DIV/0!				AVG RED	#DIV/0!	AVG GRN	#DIV/0!						AVG RED	#DIV/0!	AVG GRN	#DIV/0!				AVG RED	#DIV/0!	AVG GRN	#DIV/0!				AVG RED	#DIV/0!	AVG GRN	#DIV/0!				AVG RED	#DIV/0!	AVG GRN	#DIV/0!				AVG RED	#DIV/0!	AVG GRN	#DIV/0!
		AVG RED0	#DIV/0!	AVG GRN0	#DIV/0!				AVG RED0	#DIV/0!	AVG GRN0	#DIV/0!						AVG RED0	#DIV/0!	AVG GRN0	#DIV/0!				AVG RED0	#DIV/0!	AVG GRN0	#DIV/0!				AVG RED0	#DIV/0!	AVG GRN0	#DIV/0!				AVG RED0	#DIV/0!	AVG GRN0	#DIV/0!				AVG RED0	#DIV/0!	AVG GRN0	#DIV/0!
bg1	Red	AVG	AVG Total				bg1	Red	AVG	AVG Total						bg1	Red	AVG	AVG Total				bg1	Red	AVG	AVG Total				bg1	Red	AVG	AVG Total				bg1	Red	AVG	AVG Total				bg1	Red	AVG	AVG Total
5	68.2235	64.2712	43.2311				5	73.7412	62.3621	40.0475						5	108.69	108.81	80.6684				3		#DIV/0!	#DIV/0!				5	157.475	159.069	129.277				5	161.502	144.907	114.709				5	86.3451	79.4994	51.7192
6	65.502						6	62.3216								6	100.365						4							6	172.518						6	159.478						6	84.4941
7	59.4235						7	62.3176								7	111.373						5							7	166.471						7	146.871						7	87.4275
8	60.2902						8	57.6118								8	113.631						6							8	153.298						8	143.573						8	78.2157
9	70.6902						9	58.0118								9	109.859						7							9	154.761						9	135.071						9	74.0588
10	61.498						10	60.1686								10	108.941						8							10	149.89						10	122.945						10	66.4549
	Green							Green									Green							Green							Green							Green							Green
5	133.604	123.142	100.309				5	160.698	153.049	114.383						5	138.149	118.582	86.2956				3		#DIV/0!	#DIV/0!				5	134.796	120.4	86.6682				5	172.937	175.752	140.869				5	169.416	160.799	120.664
6	125.867						6	164.004								6	122.729						4							6	137.694						6	171.812						6	158.702
7	119.812						7	152.89								7	113.184						5							7	127.553						7	179.561						7	166.216
8	122.224						8	128.969								8	105.471						6							8	107.024						8	190.098						8	163.314
9	120.196						9	135.467								9	107.784						7							9	87.537						9	174.373						9	158.31
10	117.149						10	176.267								10	124.176						8							10	127.796						10	165.729						10	148.835
bg2	Red						bg2	Red								bg2	Red						bg2	Red						bg2	Red						bg2	Red						bg2	Red
5	36.5647	33.8366					5	33.6941	29.7399							5	72.9686	66.6523					3		#DIV/0!					5	113.212	114.205					5	108.447	96.8111					5	43.9059	37.3824
6	36.4706						6	31.0431								6	68.8039						4							6	116.98						6	100.953						6	42.0706
7	31.8039						7	28.8471								7	65.1137						5							7	117.412						7	95.2863						7	37.8667
8	30.8118						8	29.4392								8	64.851						6							8	111.953						8	93.8118						8	37.502
9	35.0353						9	27.0628								9	67.1373						7							9	110.941						9	92.7098						9	31.1725
10	32.3333						10	28.3529								10	61.0392						8							10	114.733						10	89.6588						10	31.7765
	Green							Green									Green							Green							Green							Green							Green
5	93.7961	90.9301					5	101.671	91.6778							5	71.8431	64.6836					3		#DIV/0!					5	74.6157	68.1628					5	125.349	115.359					5	106.478	92.1105
6	97.4706						6	104.482								6	61.4941						4							6	67.7765						6	122.239						6	89.0667
7	94.6549						7	94.6863								7	70.3137						5							7	68.4745						7	117.161						7	91.3922
8	87.1176						8	84.3922								8	64.8196						6							8	63.6863						8	108.882						8	90.8078
9	79.5765						9	79.0941								9	63.8549						7							9	67.0706						9	102.251						9	92.5686
10	92.9647						10	85.7412								10	55.7765						8							10	67.3529						10	116.275						10	82.349
bg3	Red						bg3	Red								bg3	Red						bg3	Red						bg3	Red						bg3	Red						bg3	Red
5	32.7725	31.5856					5	33.4431	28.0405							5	64.4	66.5431					3		#DIV/0!					5	117.533	114.556					5	104.918	102.41					5	39.3255	38.2758
6	34.5725						6	30.5333								6	66.4588						4							6	118.314						6	99.9765						6	37.7216
7	35.5216						7	26.902								7	67.051						5							7	116.498						7	101.765						7	38.0706
8	33.3098						8	26.3608								8	65.2902						6							8	114.612						8	98.5373						8	38.3451
9	28.1922						9	27.5686								9	66.4196						7							9	110.859						9	104.973						9	37.349
10	25.1451						10	23.4353								10	69.6392						8							10	109.522						10	104.29						10	38.8431
	Green							Green									Green							Green							Green							Green							Green
5	89.3922	86.8536					5	93.2902	98.4209							5	64.7961	75.6209					3		#DIV/0!					5	78.0431	71.4418					5	125.204	131.495					5	97.2902	109.082
6	92.7647						6	102.627								6	69.0784						4							6	71.9529						6	146.984						6	108.278
7	87.9725						7	94.3726								7	79.6						5							7	69.6353						7	131.49						7	110.059
8	82.2392						8	102.89								8	82.6941						6							8	82.6274						8	135.294						8	115.071
9	82.4235						9	101.078								9	80.3451						7							9	69.6941						9	130.388						9	120.82
10	86.3294						10	96.2667								10	77.2118						8							10	56.698						10	119.612						10	102.977
	Baseline1							Baseline2									Bleach0							Bleach2							Bleach5							Bleach10							Bleach15
cnt1	Red	AVG	AVG-Bg	AVG total	Norm B		cnt1	Red	AVG	AVG-Bg	AVG total	Norm B			Baseline T	cnt1	Red	AVG	AVG-Bg	AVG total	Norm B		cnt1	Red	AVG	AVG-Bg	AVG total	Norm B		cnt1	Red	AVG	AVG-Bg	AVG total	Norm B		cnt1	Red	AVG	AVG-Bg	AVG total	Norm B		cnt1	Red	AVG	AVG-Bg	AVG total	Norm B
8	470.761	510.537	467.306	331.799	0.985386		8	579.669	557.154	517.106	341.64	1.01461			336.719	8	430.007	460.111	379.443	264.453	0.785382		6		#DIV/0!	#DIV/0!	#DIV/0!	#DIV/0!		8	550.14	577.156	447.879	322.028	0.956368		8	498.58	563.489	448.78	397.977	1.18192		9	595.515	565.886	514.167	422.081	1.25351
9	543.512						9	569.437								9	481.177						7							9	609.881						9	613.986						10	604.433
10	517.338						10	522.355								10	469.15						8							10	571.447						10	577.901						11	497.71
	Green							Green									Green							Green							Green							Green							Green
8	316.399	373.236	272.928	314.57	0.993557		8	402.116	411.486	297.103	318.65	1.00644			316.61	8	344.904	376.129	289.833	309.88	0.978744		6		#DIV/0!	#DIV/0!	#DIV/0!	#DIV/0!		8	341.225	354.887	268.219	319.969	1.01061		8	399.099	445.155	304.286	361.624	1.14217		9	492.365	469.055	348.391	405.437	1.28056
9	392.655						9	430.444								9	399.451						7							9	371.539						9	471.123						10	490.205
10	410.655						10	401.898								10	384.031						8							10	351.898						10	465.242						11	424.594
cnt2	Red						cnt2	Red								cnt2	Red						cnt2	Red						cnt2	Red						cnt2	Red						cnt2	Red
6	384.653	343.645	300.414				5	307.122	350.74	310.693						5	159.955	186.271	105.602				4		#DIV/0!	#DIV/0!				5	297.569	354.432	225.155				5	410.125	464.096	349.387				5	363.295	443.541	391.821
7	385.174						6	393.615								6	207.319						5							6	393.587						6	527.58						6	522.174
8	261.108						7	351.483								7	191.538						6							7	372.139						7	454.583						7	445.153
	Green							Green									Green							Green							Green							Green							Green
6	409.142	414.987	314.678				5	359.938	412.184	297.802						5	312.097	346.392	260.097				4		#DIV/0!	#DIV/0!				5	334.472	339.517	252.849				5	398.778	412.645	271.776				5	374.875	415.434	294.77
7	429.538						6	452.955								6	339.052						5							6	324.993						6	414.955						6	456.417
8	406.281						7	423.66								7	388.028						6							7	359.087						7	424.201						7	415.01
cnt3	Red						cnt3	Red								cnt3	Red						cnt3	Red						cnt3	Red						cnt3	Red						cnt3	Red
4	356.639	401.545	358.314				4	329.38	399.421	359.374						4	282.753	297.776	217.108				4		#DIV/0!	#DIV/0!				4	340.31	392.823	263.547				4	449.384	529.931	415.222				4	339.835	407.444	355.725
5	465.408						5	439.514								5	329.8						5							5	431.031						5	571.91						5	446.882
6	382.588						6	429.369								6	280.776						6							6	407.129						6	568.498						6	435.616
	Green							Green									Green							Green							Green							Green							Green
4	470.09	459.596	359.287				4	451.698	480.193	365.811						4	366.863	393.949	307.653				4		#DIV/0!	#DIV/0!				4	422.71	445.627	358.959				4	560.973	565.418	424.549				4	561.169	583.124	462.46
5	483.678						5	500.733								5	413.788						5							5	492.286						5	581.498						5	598.937
6	425.02						6	488.149								6	401.196						6							6	421.886						6	553.784						6	589.267
cnt4	Red						cnt4	Red								cnt4	Red						cnt4	Red						cnt4	Red						cnt4	Red						cnt4	Red
3	558.655	511.284	468.053				3	546.867	547.137	507.09						3	338.075	323.254	242.585				5		#DIV/0!	#DIV/0!				3	517.863	529.956	400.679				3	678.051	631.849	517.14				3	678.271	670.986	619.266
4	558.231						4	598.016								4	353.188						6							4	574.4						4	657.42						4	748.753
5	416.965						5	496.529								5	278.498						7							5	497.604						5	560.075						5	585.933
	Green							Green									Green							Green							Green							Green							Green
3	521.878	525.042	424.733				3	555.529	557.959	443.577						3	419.043	429.218	342.923				5		#DIV/0!	#DIV/0!				3	475.596	485.975	399.307				3	602.153	579.669	438.8				3	635.008	638.59	517.926
4	546.435						4	573.016								4	444.702						6							4	486.31						4	573.624						4	656.651
5	506.812						5	545.333								5	423.91						7							5	496.02						5	563.231						5	624.11
cnt5	Red						cnt5	Red								cnt5	Red						cnt5	Red						cnt5	Red						cnt5	Red						cnt5	Red
3	242.863	229.848	186.617				3	229.255	228.412	188.364						3	294.808	285.514	204.845				5		#DIV/0!	#DIV/0!				3	325.424	329.141	199.865				3	347.82	334.646	219.937				3	317.302	304.588	252.869
4	240.698						4	238.988								4	307.702						6							4	358.678						4	348.086						4	318.086
5	205.984						5	216.992								5	254.031						7							5	303.322						5	308.031						5	278.376
	Green							Green									Green							Green							Green							Green							Green
3	553.157	539.276	438.967				3	557.835	562.793	448.411						3	575.635	583.729	497.434				5		#DIV/0!	#DIV/0!				3	535.894	565.055	478.387				3	682.627	669.397	528.528				3	783.18	755.076	634.412
4	561.267						4	570.357								4	629.314						6							4	589.196						4	700.725						4	773.584
5	503.404						5	560.188								5	546.239						7							5	570.075						5	624.839						5	708.463
cnt6	Red						cnt6	Red								cnt6	Red						cnt6	Red						cnt6	Red						cnt6	Red						cnt6	Red
7	389.035	413.505	370.274				7	337.582	392.514	352.466						7	391.904	400.418	319.75				7		#DIV/0!	#DIV/0!				7	460.601	495.823	366.546				8	625.701	615.735	501.026				7	552.415	588.038	536.318
8	430.846						8	426.174								8	441.662						8							8	521.852						9	626.797						8	633.994
9	420.633						9	413.785								9	367.688						9							9	505.016						10	594.707						9	577.704
	Green							Green									Green							Green							Green							Green							Green
7	337.842	356.377	256.069				7	324.852	352.161	237.778						7	341.489	358.462	272.166				7		#DIV/0!	#DIV/0!				7	334.058	367.601	280.933				8	494.051	487.837	346.968				7	518.457	529.894	409.23
8	371.547						8	369.714								8	372.331						8							8	393.527						9	483.473						8	554.884
9	359.743						9	361.916								9	361.566						9							9	375.219						10	485.987						9	516.341
cnt7	Red						cnt7	Red								cnt7	Red						cnt7	Red						cnt7	Red						cnt7	Red						cnt7	Red
9	304.833	303.282	260.051				9	249.743	272.53	232.482						8	289.713	303.383	222.715				6		#DIV/0!	#DIV/0!				9	385.007	379.179	249.902				9	426.023	426.31	311.601				9	327.957	349.133	297.414
10	312.457						10	294.393								9	320.18						7							10	384.353						10	433.95						10	359.81
11	292.557						11	273.453								10	300.257						8							11	368.177						11	418.957						11	359.633
	Green							Green									Green							Green							Green							Green							Green
9	324.577	335.121	234.813				9	299.84	321.978	207.595						8	271.98	311.393	225.098				6		#DIV/0!	#DIV/0!				9	293.493	313.282	226.614				9	411.59	417.861	276.992				9	380.247	413.998	293.334
10	343.37						10	315.907								9	323.81						7							10	299.57						10	418.29						10	437.203
11	337.417						11	350.187								10	338.39						8							11	346.783						11	423.703						11	424.543
cnt8	Red						cnt8	Red								cnt8	Red						cnt8	Red						cnt8	Red						cnt8	Red						cnt8	Red
9	275.067	272.799	229.568				10	278.839	260.222	220.175						9	342.69	350.519	269.851				5		#DIV/0!	#DIV/0!				9	413.561	442.881	313.604				9	442.192	438.627	323.918				9	338.863	374.205	322.486
10	284.91						11	273.639								10	364.349						6							10	476.631						10	462						10	410.569
11	258.42						12	228.188								11	344.518						7							11	438.451						11	411.69						11	373.184
	Green							Green									Green							Green							Green							Green							Green
9	221.929	234.673	134.365				10	289.859	293.409	179.026						9	264.588	281.074	194.779				5		#DIV/0!	#DIV/0!				9	280.651	299.846	213.178				9	329.451	345.729	204.86				9	303.373	319.496	198.832
10	231.118						11	298.792								10	291.737						6							10	312.118						10	366.682						10	313.745
11	250.973						12	291.576								11	286.898						7							11	306.769						11	341.055						11	341.369
cnt9	Red						cnt9	Red								cnt9	Red						cnt9	Red						cnt9	Red						cnt9	Red						cnt9	Red
11	417.286	388.824	345.593				11	423.925	427.059	387.011						11	454.671	498.85	418.181				5		#DIV/0!	#DIV/0!				11	558.176	560.348	431.071				11	520.863	609.491	494.782				11	504.906	560.379	508.66
12	424.812						12	478.294								12	551.729						6							12	595.498						12	664.031						12	629.933
13	324.373						13	378.957								13	490.149						7							13	527.369						13	643.58						13	546.298
	Green							Green									Green							Green							Green							Green							Green
11	508.408	495.599	395.29				11	531.043	505.131	390.748						11	470.216	485.235	398.94				5		#DIV/0!	#DIV/0!				11	503.71	487.943	401.274				11	571.318	598.722	457.853				11	600.682	610.244	489.58
12	520.216						12	467.094								12	482.925						6							12	484.749						12	595.506						12	595.667
13	458.173						13	517.255								13	502.565						7							13	475.369						13	629.341						13	634.384
cnt10	Red						cnt10	Red								cnt10	Red						cnt10	Red						cnt10	Red						cnt10	Red						cnt10	Red
	Green							Green									Green							Green							Green							Green							Green
[truncated: 34 more columns]

## Sheet: s2_20B
	Baseline1							Baseline2									Bleach0							Bleach2							Bleach5							Bleach10							Bleach20
Sp1	Red	AVG	AVG-Bg	Norm B	Norm CNT	Norm 0		Red	AVG	AVG-Bg	Norm B	Norm CNT	Norm 0		Baseline T		Red	AVG	AVG-Bg	Norm B	Norm CNT	Norm 0		Red	AVG	AVG-Bg	Norm B	Norm CNT	Norm 0		Red	AVG	AVG-Bg	Norm B	Norm CNT	Norm 0		Red	AVG	AVG-Bg	Norm B	Norm CNT	Norm 0		Red	AVG	AVG-Bg	Norm B	Norm CNT
5	629.64	699.164	631.325	0.989374	0.946298	0.930908	6	694.289	772.731	644.886	1.01063	1.05882	1.07568		638.106	6	229.202	210.877	169.361	0.265412	0.314614	0.118185	4		#DIV/0!	#DIV/0!	#DIV/0!	#DIV/0!	#DIV/0!	4	215.557	240.376	149.356	0.234061	0.239711	0.021815	4	192.89	224.778	139.568	0.218723	0.218617	-0.00532452	4	281.697	353.317	232.714	0.364695	0.331519
6	795.518						7	865.219								7	247.702						5							5	279.724						5	242.759						5	391.772
7	672.333						8	758.684								8	155.728						6							6	225.846						6	238.684						6	386.482
	Green							Green									Green							Green							Green							Green							Green
5	868.311	823.284	599	1.03753	0.973265	0.965603	6	813.908	758.845	555.661	0.962465	1.03052	1.03926		577.331	6	400.031	369.235	122.18	0.21163	0.222756	0	4		#DIV/0!	#DIV/0!	#DIV/0!	#DIV/0!	#DIV/0!	4	396.469	365.365	156.754	0.271515	0.294627	0.0924693	4	317.667	309.534	110.105	0.190715	0.225066	0.00297199	4	397.781	375.493	158.064	0.273784	0.3009
6	850.961						7	746.895								7	371.583						5							5	371.75						5	325.474						5	399.044
7	750.579						8	715.732								8	336.092						6							6	327.877						6	285.461						6	329.654
Sp2	Red							Red									Red							Red							Red							Red							Red
7	333.097	391.08	323.242	1.08298	1.03583	1.04903	8	384.949	401.553	273.708	0.917022	0.960756	0.946294		298.475	7	64.6852	83.2006	41.6841	0.139657	0.165547	-0.141969	5		#DIV/0!	#DIV/0!	#DIV/0!	#DIV/0!	#DIV/0!	5		#DIV/0!	#DIV/0!	#DIV/0!	#DIV/0!	#DIV/0!	150		#DIV/0!	#DIV/0!	#DIV/0!	#DIV/0!	#DIV/0!	5		#DIV/0!	#DIV/0!	#DIV/0!	#DIV/0!
8	459.449						9	484.644								8	92.9769						6							6							180							6
9	380.694						10	335.065								9	91.9398						7							7							210							7
	Green							Green									Green							Green							Green							Green							Green
7	643.107	623.175	398.891	1.00473	0.942495	0.921303	8	696.093	598.318	395.134	0.995268	1.06564	1.08983		397.013	7	351.185	348.625	101.57	0.255836	0.269286	0	5		#DIV/0!	#DIV/0!	#DIV/0!	#DIV/0!	#DIV/0!	5		#DIV/0!	#DIV/0!	#DIV/0!	#DIV/0!	#DIV/0!	150		#DIV/0!	#DIV/0!	#DIV/0!	#DIV/0!	#DIV/0!	5		#DIV/0!	#DIV/0!	#DIV/0!	#DIV/0!
8	621.255						9	559.107								8	350.301						6							6							180							6
9	605.162						10	539.755								9	344.389						7							7							210							7
Sp3	Red							Red									Red							Red							Red							Red							Red
7	357.111	369.361	301.523	1.02757	0.982827	0.971755	8	397.25	413.19	285.345	0.972434	1.01881	1.03094		293.434	8	205.463	194.423	152.906	0.521092	0.617694	0.371182	3		#DIV/0!	#DIV/0!	#DIV/0!	#DIV/0!	#DIV/0!	9	372.491	347.729	256.709	0.874844	0.895963	0.82888	9	323.94	312.096	226.886	0.773211	0.772838	0.626365	9	408.565	373.503	252.9	0.861865	0.783462
8	403.176						9	491.347								9	222.634						4							10	376.829						10	355.264						10	403.176
9	347.796						10	350.972								10	155.171						5							11	293.866						11	257.083						11	308.769
	Green							Green									Green							Green							Green							Green							Green
7	506.069	495.696	271.412	1.03973	0.975327	0.959418	8	435.801	453.853	250.669	0.960268	1.02816	1.04632		261.041	8	288.5	344.278	97.2227	0.372443	0.392023	0	3		#DIV/0!	#DIV/0!	#DIV/0!	#DIV/0!	#DIV/0!	9	320.949	356.765	148.154	0.567551	0.615862	0.368171	9	327.917	358.374	158.945	0.60889	0.718562	0.537091	9	367.282	410.42	192.991	0.739313	0.812535
8	488.597						9	446.977								9	339.264						4							10	362.366						10	378.144						10	389.551
9	492.421						10	478.782								10	405.069						5							11	386.981						11	369.06						11	474.426
Sp4	Red							Red									Red							Red							Red							Red							Red
6	515.304	505.719	437.881	1.07373	1.02698	1.04421	7	516.358	505.591	377.747	0.926273	0.970448	0.951576		407.814	6	278.553	290.254	248.737	0.609928	0.722998	0.546101	3		#DIV/0!	#DIV/0!	#DIV/0!	#DIV/0!	#DIV/0!	7	474.099	473.344	382.324	0.937496	0.960128	0.934665	7	497.362	473.598	388.389	0.952369	0.95191	0.921198	6	553.795	554.09	433.487	1.06295	0.966257
7	535.894						8	522.092								7	304.976						4							8	500.454						8	502.747						7	586.068
8	465.959						9	478.324								8	287.232						5							9	445.478						9	420.686						8	522.406
	Green							Green									Green							Green							Green							Green							Green
6	661.761	633.215	408.932	1.05696	0.991491	0.986056	7	609.13	568.039	364.854	0.943036	1.00971	1.01592		386.893	6	374.587	390.307	143.252	0.370263	0.389728	0	3		#DIV/0!	#DIV/0!	#DIV/0!	#DIV/0!	#DIV/0!	7	385.147	393.597	184.986	0.478132	0.518832	0.211551	7	403.877	399.557	200.129	0.517271	0.610442	0.361664	6	470.993	472.403	254.974	0.659029	0.7243
7	636.307						8	555.962								7	380.976						4							8	374.348						8	402.689						7	472.283
8	601.577						9	539.024								8	415.358						5							9	421.297						9	392.106						8	473.932
Sp5	Red							Red									Red							Red							Red							Red							Red
6	267.099	291.001	223.163	0.979397	0.936756	0.902926	7	354.682	360.397	232.552	1.0206	1.06928	1.10633		227.857	6	127.606	129.785	88.2681	0.387383	0.459197	0.169918	4		#DIV/0!	#DIV/0!	#DIV/0!	#DIV/0!	#DIV/0!	6	233.876	235.452	144.432	0.633871	0.649174	0.461515	5	256.701	249.627	164.417	0.72158	0.721232	0.572117	6	325.307	328.375	207.772	0.91185	0.828899
7	302.19						8	365.745								7	126.029						5							7	246.445						6	258.026						7	324.226
8	303.715						9	360.763								8	135.719						6							8	226.036						7	234.153						8	335.591
	Green							Green									Green							Green							Green							Green							Green
6	660.201	608.669	384.386	0.999395	0.937488	0.90405	7	631.562	588.036	384.852	1.00061	1.07135	1.10952		384.619	6	390.423	374.398	127.343	0.331088	0.348494	0	4		#DIV/0!	#DIV/0!	#DIV/0!	#DIV/0!	#DIV/0!	6	388.314	360.988	152.376	0.396174	0.429898	0.124947	5	431.007	383.445	184.016	0.478438	0.564614	0.331723	6	479.639	449.427	231.998	0.603189	0.66293
7	602.391						8	614.35								7	379.296						5							7	351.142						6	369.142						7	429.135
8	563.416						9	518.197								8	353.474						6							8	343.507						7	350.186						8	439.507
Sp6	Red							Red									Red							Red							Red							Red							Red
8	333.539	305.751	237.913	1.03391	0.988891	0.981408	8	297.461	350.154	222.309	0.966094	1.01217	1.02037		230.111	8	255.344	268.871	227.355	0.988022	1.17118	1.28648	5		#DIV/0!	#DIV/0!	#DIV/0!	#DIV/0!	#DIV/0!	9	366.234	338.299	247.279	1.07461	1.10055	1.16828	8	313.273	357.43	272.22	1.183	1.18243	1.3053	8	430.262	426.162	305.559	1.32788	1.20708
9	315.602						9	383.66								9	311.93						6							10	359.582						9	395.641						9	440.719
10	268.113						10	369.34								10	239.34						7							11	289.082						10	363.375						10	407.504
	Green							Green									Green							Green							Green							Green							Green
8	504.473	475.866	251.583	1.01505	0.952175	0.919963	8	415.051	447.306	244.122	0.984948	1.05459	1.09135		247.852	8	347.082	341.824	94.7694	0.382363	0.402464	0	5		#DIV/0!	#DIV/0!	#DIV/0!	#DIV/0!	#DIV/0!	9	370.356	377.124	168.512	0.67989	0.737764	0.561138	8	317.355	354.669	155.241	0.626344	0.73916	0.563474	8	369.473	368.638	151.209	0.610078	0.670501
9	477.098						9	466.332								9	349.539						6							10	391.699						9	365.305						9	368.707
10	446.027						10	460.535								10	328.852						7							11	369.316						10	381.348						10	367.734
Sp7	Red							Red									Red							Red							Red							Red							Red
7	614.051	721.223	653.384	1.05721	1.01118	1.01812	8	608.639	710.511	582.667	0.942787	0.98775	0.980152		618.025	7	333.839	399.371	357.855	0.579029	0.686371	0.491829	4		#DIV/0!	#DIV/0!	#DIV/0!	#DIV/0!	#DIV/0!	8	779.07	758.128	667.108	1.07942	1.10548	1.1709	8	714.497	765.878	680.668	1.10136	1.10083	1.16337	8	1136.49	1098.98	978.379	1.58307	1.43906
8	806.206						9	828.155								8	444.712						5							9	809.766						9	861.497						9	1203.3
9	743.411						10	694.74								9	419.563						6							10	685.547						10	721.639						10	957.155
	Green							Green									Green							Green							Green							Green							Green
7	735.627	702.267	477.984	1.09964	1.03152	1.05107	8	618.769	594.55	391.365	0.900364	0.964023	0.941707		434.675	7	378.032	405.149	158.094	0.363706	0.382827	0	4		#DIV/0!	#DIV/0!	#DIV/0!	#DIV/0!	#DIV/0!	8	429.332	451.673	243.061	0.55918	0.60678	0.362869	8	445.873	479.507	280.079	0.644341	0.760399	0.611777	8	596.671	573.403	355.974	0.818944	0.900053
8	718.095						9	634.56								8	412.696						5							9	464.304						9	489.848						9	575.06
9	653.079						10	530.32								9	424.718						6							10	461.383						10	502.801						10	548.478
Sp8	Red							Red									Red							Red							Red							Red							Red
5		#DIV/0!	#DIV/0!	#DIV/0!	#DIV/0!	#DIV/0!	5		#DIV/0!	#DIV/0!	#DIV/0!	#DIV/0!	#DIV/0!		#DIV/0!	3		#DIV/0!	#DIV/0!	#DIV/0!	#DIV/0!	#DIV/0!	3		#DIV/0!	#DIV/0!	#DIV/0!	#DIV/0!	#DIV/0!	2		#DIV/0!	#DIV/0!	#DIV/0!	#DIV/0!	#DIV/0!	90		#DIV/0!	#DIV/0!	#DIV/0!	#DIV/0!	#DIV/0!	3		#DIV/0!	#DIV/0!	#DIV/0!	#DIV/0!
6							6									4							4							3							120							4
7							7									5							5							4							150							5
	Green							Green									Green							Green							Green							Green							Green
5		#DIV/0!	#DIV/0!	#DIV/0!	#DIV/0!	#DIV/0!	5		#DIV/0!	#DIV/0!	#DIV/0!	#DIV/0!	#DIV/0!		#DIV/0!	3		#DIV/0!	#DIV/0!	#DIV/0!	#DIV/0!	#DIV/0!	3		#DIV/0!	#DIV/0!	#DIV/0!	#DIV/0!	#DIV/0!	2		#DIV/0!	#DIV/0!	#DIV/0!	#DIV/0!	#DIV/0!	90		#DIV/0!	#DIV/0!	#DIV/0!	#DIV/0!	#DIV/0!	3		#DIV/0!	#DIV/0!	#DIV/0!	#DIV/0!
6							6									4							4							3							120							4
7							7									5							5							4							150							5
Sp9	Red							Red									Red							Red							Red							Red							Red
5		#DIV/0!	#DIV/0!	#DIV/0!	#DIV/0!	#DIV/0!	5		#DIV/0!	#DIV/0!	#DIV/0!	#DIV/0!	#DIV/0!		#DIV/0!	3		#DIV/0!	#DIV/0!	#DIV/0!	#DIV/0!	#DIV/0!	3		#DIV/0!	#DIV/0!	#DIV/0!	#DIV/0!	#DIV/0!	2		#DIV/0!	#DIV/0!	#DIV/0!	#DIV/0!	#DIV/0!	60		#DIV/0!	#DIV/0!	#DIV/0!	#DIV/0!	#DIV/0!	2		#DIV/0!	#DIV/0!	#DIV/0!	#DIV/0!
6							6									4							4							3							90							3
7							7									5							5							4							120							4
	Green							Green									Green							Green							Green							Green							Green
5		#DIV/0!	#DIV/0!	#DIV/0!	#DIV/0!	#DIV/0!	5		#DIV/0!	#DIV/0!	#DIV/0!	#DIV/0!	#DIV/0!		#DIV/0!	3		#DIV/0!	#DIV/0!	#DIV/0!	#DIV/0!	#DIV/0!	3		#DIV/0!	#DIV/0!	#DIV/0!	#DIV/0!	#DIV/0!	2		#DIV/0!	#DIV/0!	#DIV/0!	#DIV/0!	#DIV/0!	60		#DIV/0!	#DIV/0!	#DIV/0!	#DIV/0!	#DIV/0!	2		#DIV/0!	#DIV/0!	#DIV/0!	#DIV/0!
6							6									4							4							3							90							3
7							7									5							5							4							120							4
Sp10	Red							Red									Red							Red							Red							Red							Red
															#DIV/0!
	Green							Green									Green							Green							Green							Green							Green
															#DIV/0!
		AVG RED	#DIV/0!	AVG GRN	#DIV/0!				AVG RED	#DIV/0!	AVG GRN	#DIV/0!						AVG RED	#DIV/0!	AVG GRN	#DIV/0!				AVG RED	#DIV/0!	AVG GRN	#DIV/0!				AVG RED	#DIV/0!	AVG GRN	#DIV/0!				AVG RED	#DIV/0!	AVG GRN	#DIV/0!				AVG RED	#DIV/0!	AVG GRN	#DIV/0!
		AVG RED0	#DIV/0!	AVG GRN0	#DIV/0!				AVG RED0	#DIV/0!	AVG GRN0	#DIV/0!						AVG RED0	#DIV/0!	AVG GRN0	#DIV/0!				AVG RED0	#DIV/0!	AVG GRN0	#DIV/0!				AVG RED0	#DIV/0!	AVG GRN0	#DIV/0!				AVG RED0	#DIV/0!	AVG GRN0	#DIV/0!				AVG RED0	#DIV/0!	AVG GRN0	#DIV/0!
bg1	Red	AVG	AVG Total				bg1	Red	AVG	AVG Total						bg1	Red	AVG	AVG Total				bg1	Red	AVG	AVG Total				bg1	Red	AVG	AVG Total				bg1	Red	AVG	AVG Total				bg1	Red	AVG	AVG Total
5	95.575	75.984	67.8384				5	176.06	147.586	127.845						5	61.034	53.2302	41.5166				3		#DIV/0!	#DIV/0!				5	130.444	102.991	91.02				5	114.53	95.8812	85.2094				5	155.996	139.047	120.603
6	81.429						6	159.825								6	51.746						4							6	118.272						6	106.243						6	150.261
7	78.724						7	148.437								7	56.612						5							7	98.757						7	90.9216						7	143.705
8	71.437						8	141.556								8	55.922						6							8	95.205						8	82.4515						8	134.765
9	66.649						9	126.485								9	48.463						7							9	84.328						9	88.3284						9	125.944
10	62.09						10	133.153								10	45.604						8							10	90.94						10	92.8134						10	123.608
	Green							Green									Green							Green							Green							Green							Green
5	327.877	292.154	224.283				5	314.377	266.136	203.184						5	257.507	284.819	247.055				3		#DIV/0!	#DIV/0!				5	301.045	267.241	208.612				5	258.082	240.044	199.429				5	317.172	285.9	217.429
6	287.627						6	301.907								6	271.519						4							6	264.888						6	239.067						6	300.007
7	293.896						7	261.798								7	290.56						5							7	276.825						7	223.149						7	275.53
8	285.052						8	229.869								8	285.425						6							8	276.44						8	228.265						8	277.989
9	286.119						9	230.019								9	290.063						7							9	228.582						9	239.985						9	273.631
10	272.351						10	258.843								10	313.84						8							10	255.664						10	251.716						10	271.071
bg2	Red						bg2	Red								bg2	Red						bg2	Red						bg2	Red						bg2	Red						bg2	Red
5	109.582	77.4303					5	174.187	125.741							5	81.097	47.2113					3		#DIV/0!					5	132.261	94.9583					5	112.313	86.9776					5	129.817	120.992
6	96.28						6	140.679								6	62.123						4							6	112.418						6	101.459						6	128.328
7	83.892						7	120.153								7	44.213						5							7	95.0821						7	84.6045						7	122.444
8	64.28						8	110.179								8	36.757						6							8	80.4254						8	72.5299						8	115.34
9	55.444						9	113.09								9	32.515						7							9	76.9179						9	75.6082						9	112.847
10	55.104						10	96.16								10	26.563						8							10	72.6455						10	75.3507						10	117.175
	Green							Green									Green							Green							Green							Green							Green
5	237.985	198.348					5	234.601	188.652							5	275.675	243.945					3		#DIV/0!					5	206.56	188.761					5	239.138	187.901					5	227.896	189.74
6	205.638						6	207.619								6	271.25						4							6	202.612						6	195.698						6	203.698
7	181.299						7	181.91								7	251.369						5							7	187.071						7	165.545						7	194.884
8	178.183						8	175.119								8	217.351						6							8	184.362						8	170.105						8	180.287
9	200.052						9	168.369								9	199.757						7							9	167.552						9	171.403						9	156.66
10	186.929						10	164.291								10	248.269						8							10	184.407						10	185.515						10	175.015
bg3	Red						bg3	Red								bg3	Red						bg3	Red						bg3	Red						bg3	Red						bg3	Red
5	55.403	50.1007					5	120.578	110.207							5	25.7239	24.1082					3		#DIV/0!					5	84.2052	75.1107					5	70.1306	72.7693					5	113.075	101.771
6	51.903						6	105.489								6	28.3172						4							6	80.2724						6	68.0634						6	107.802
7	48.8097						7	111.765								7	27.847						5							7	69.8246						7	72.4254						7	98.3881
8	47.9216						8	115.142								8	17.3209						6							8	68.3545						8	72.1791						8	91.6828
9	47.1343						9	107.575								9	23.9366						7							9	72.0299						9	75.0336						9	96.9216
10	49.4328						10	100.694								10	21.5037						8							10	75.9776						10	78.7836						10	102.754
	Green							Green									Green							Green							Green							Green							Green
5	170.642	182.348					5	139.728	154.766							5	208.735	212.401					3		#DIV/0!					5	182.832	169.833					5	142.612	170.341					5	179.683	176.647
6	198.463						6	147.694								6	193.81						4							6	182.276						6	143.108						6	181.381
7	185.362						7	140.698								7	236.317						5							7	164.683						7	156.015						7	180.612
8	181.548						8	163.854								8	215.81						6							8	148.937						8	185.519						8	170.817
9	172.582						9	159.728								9	198.687						7							9	166.705						9	198.903						9	172.216
10	185.493						10	176.896								10	221.045						8							10	173.567						10	195.892						10	175.172
	Baseline1							Baseline2									Bleach0							Bleach2							Bleach5							Bleach10							Bleach15
cnt1	Red	AVG	AVG-Bg	AVG total	Norm B		cnt1	Red	AVG	AVG-Bg	AVG total	Norm B			Baseline T	cnt1	Red	AVG	AVG-Bg	AVG total	Norm B		cnt1	Red	AVG	AVG-Bg	AVG total	Norm B		cnt1	Red	AVG	AVG-Bg	AVG total	Norm B		cnt1	Red	AVG	AVG-Bg	AVG total	Norm B		cnt1	Red	AVG	AVG-Bg	AVG total	Norm B
5	407.373	410.572	342.734	362.401	1.04552		6	398.399	426.732	298.888	330.844	0.954479			346.622	5	132.302	150.014	108.497	292.414	0.84361		6		#DIV/0!	#DIV/0!	#DIV/0!	#DIV/0!		5	259.888	260.961	169.941	338.452	0.976428		5	453.526	483.369	398.16	346.79	1.00048		5	533.776	545.555	424.952	381.31	1.10007
6	486.317						7	476.757								6	164.593						7							6	293.772						6	517.653						6	609.843
7	338.026						8	405.041								7	153.146						8							7	229.224						7	478.929						7	493.045
	Green							Green									Green							Green							Green							Green							Green
5	637.381	600.857	376.574	480.6	1.06603		6	550.578	500.132	296.948	421.059	0.933965			450.83	5	573.664	526.235	279.18	428.312	0.950053		6		#DIV/0!	#DIV/0!	#DIV/0!	#DIV/0!		5	501	486.279	277.667	415.464	0.921554		5	526.354	484.194	284.765	382.021	0.847372		5	546.146	530.919	313.49	410.203	0.909884
6	612.556						7	523.34								6	526.552						7							6	490.843						6	486.739						6	543.593
7	552.634						8	426.478								7	478.489						8							7	466.993						7	439.489						7	503.019
cnt2	Red						cnt2	Red								cnt2	Red						cnt2	Red						cnt2	Red						cnt2	Red						cnt2	Red
7	444.597	436.201	368.363				8	475.638	462.54	334.695						7	269.656	355.4	313.883				4		#DIV/0!	#DIV/0!				7	502.656	511.209	420.189				8	485.413	455.557	370.348				7	496.175	531.382	410.779
8	485.922						9	512.078								8	417.05						5							8	554.659						9	486.397						8	572.263
9	378.084						10	399.903								9	379.494						6							9	476.312						10	394.862						9	525.709
	Green							Green									Green							Green							Green							Green							Green
7	689.947	728.09	503.806				8	584.225	628.572	425.388						7	559.459	625.045	377.99				4		#DIV/0!	#DIV/0!				7	627.459	629.983	421.372				8	595.972	591.712	392.283				7	549.213	592.819	375.39
8	730.619						9	615.741								8	656.95						5							8	633.616						9	607.341						8	603.216
9	763.703						10	685.75								9	658.725						6							9	628.875						10	571.822						9	626.028
cnt3	Red						cnt3	Red								cnt3	Red						cnt3	Red						cnt3	Red						cnt3	Red						cnt3	Red
5	272.491	257.984	190.145				6	321.797	307.857	180.013						5	192.566	211.009	169.492				4		#DIV/0!	#DIV/0!				6	269.403	259.591	168.571				6	293.337	276.682	191.473				5	308.103	346.534	225.931
6	284.141						7	333.856								6	225.491						5							7	277.147						7	293.884						6	366.459
7	217.319						8	267.919								7	214.969						6							8	232.222						8	242.825						7	365.041
	Green							Green									Green							Green							Green							Green							Green
5	391.097	390.028	165.745				6	362.241	358.933	155.749						5	423.522	449.243	202.188				4		#DIV/0!	#DIV/0!				6	349.203	346.224	137.612				6	403.078	367.363	167.935				5	376.3	398.722	181.293
6	391.572						7	378.719								6	477.081						5							7	341.825						7	369.95						6	417.531
7	387.416						8	335.841								7	447.125						6							8	347.644						8	329.062						7	402.334
cnt4	Red						cnt4	Red								cnt4	Red						cnt4	Red						cnt4	Red						cnt4	Red						cnt4	Red
3	265.478	313.002	245.164				5	364.372	343.165	215.32						4	254.197	282.798	241.281				5		#DIV/0!	#DIV/0!				4	389.328	384.309	293.289				4	369.788	392.179	306.97				4	415.172	407.155	286.552
4	345.416						6	355.15								5	316.509						6							5	417.853						5	434.622						5	442.106
5	328.112						7	309.972								6	277.688						7							6	345.747						6	372.128						6	364.188
	Green							Green									Green							Green							Green							Green							Green
3	697.256	617.521	393.237				5	544.931	519.039	315.854						4	626.044	554.243	307.188				5		#DIV/0!	#DIV/0!				4	551.641	506.642	298.03				4	533.006	499.656	300.227				4	549.731	492.956	275.527
4	628.987						6	519.969								5	530.062						6							5	506.253						5	506.131						5	504.247
5	526.319						7	492.216								6	506.622						7							6	462.031						6	459.831						6	424.891
cnt5	Red						cnt5	Red								cnt5	Red						cnt5	Red						cnt5	Red						cnt5	Red						cnt5	Red
1	644.412	663.487	595.649				2	684.703	655.582	527.738						1	474.931	560.794	519.277				5		#DIV/0!	#DIV/0!				2	680.706	584.272	493.252				2	624.438	544.493	459.284				2	725.237	607.144	486.541
2	738.634						3	725.875								2	622.969						6							3	624.053						3	580.366						3	645.341
3	607.416						4	556.169								3	584.481						7							4	448.056						4	428.675						4	450.853
	Green							Green									Green							Green							Green							Green							Green
1	1219.48	1328.29	1104.01				2	1298.3	1228.52	1025.34						1	1086.29	1285.67	1038.61				5		#DIV/0!	#DIV/0!				2	1306.2	1165.13	956.514				2	1152.25	1020.01	820.585				2	1337.84	1116.5	899.075
2	1530.73						3	1370.48								2	1367.39						6							3	1260.45						3	1068.95						3	1178.09
3	1234.66						4	1016.79								3	1403.31						7							4	928.728						4	838.838						4	833.578
cnt6	Red						cnt6	Red								cnt6	Red						cnt6	Red						cnt6	Red						cnt6	Red						cnt6	Red
2	444.231	494.366	426.527				3	537.016	521.315	393.47						3	451.038	421.681	380.165				7		#DIV/0!	#DIV/0!				3	477.534	459.025	368.005				2	397.391	437.749	352.54				2	511.344	547.717	427.114
3	565.188						4	582.603								4	476.172						8							4	501.319						3	488.675						3	595.797
4	473.678						5	444.325								5	337.834						9							5	398.222						4	427.181						4	536.009
	Green							Green									Green							Green							Green							Green							Green
2	848.316	973.943	749.66				3	799.225	842.856	639.672						3	1104.82	1027.5	780.443				7		#DIV/0!	#DIV/0!				3	911.431	884.269	675.657				2	704.775	794.878	595.449				2	841.472	923.899	706.47
3	1092.3						4	984.912								4	1112.73						8							4	979.9						3	881.228						3	1017.67
4	981.216						5	744.431								5	864.944						9							5	761.475						4	798.631						4	912.55
cnt7	Red						cnt7	Red								cnt7	Red						cnt7	Red						cnt7	Red						cnt7	Red						cnt7	Red
6	325.497	373.745	305.907				8	398.282	425.273	297.428						8	311.205	324.747	283.231				6		#DIV/0!	#DIV/0!				7	394.698	401.186	310.166				8	386.55	378.245	293.035				7	422.352	415.524	294.921
7	398.97						9	442.96								9	358.248						7							8	427.054						9	411.674						8	441.956
8	396.768						10	434.577								10	304.789						8							9	381.805						10	336.51						9	382.265
	Green							Green									Green							Green							Green							Green							Green
6	622.899	645.548	421.265				8	536.258	542.544	339.359						8	594.564	591.728	344.673				6		#DIV/0!	#DIV/0!				7	578.648	543.069	334.458				8	523.617	497.391	297.963				7	553.698	532.374	314.945
7	704.443						9	584.433								9	611.617						7							8	587.99						9	527.289						8	564.943
8	609.302						10	506.94								10	569.003						8							9	462.57						10	441.268						9	478.48
cnt8	Red						cnt8	Red								cnt8	Red						cnt8	Red						cnt8	Red						cnt8	Red						cnt8	Red
2	682.108	635.46	567.622				2	509.493	673.582	545.738						2	423.399	538.986	497.47				5		#DIV/0!	#DIV/0!				2	701.623	724.71	633.69				2	537.657	617.869	532.66				2	658.209	714.71	594.107
3	686.388						3	739.463								3	612.067						6							3	811.493						3	647.134						3	786.623
4	537.884						4	771.791								4	581.493						7							4	661.015						4	668.817						4	699.299
	Green							Green									Green							Green							Green							Green							Green
2	501.56	461.331	237.047				2	400.354	447.107	243.923						2	477.127	476.168	229.113				5		#DIV/0!	#DIV/0!				2	461.164	436.249	227.637				2	426.791	438.417	238.988				2	436.519	439.397	221.968
3	476.548						3	478.81								3	502.478						6							3	462.91						3	472.265						3	460.007
4	405.884						4	462.157								4	448.899						7							4	384.672						4	416.194						4	421.664
cnt9	Red						cnt9	Red								cnt9	Red						cnt9	Red						cnt9	Red						cnt9	Red						cnt9	Red
11	256.138	287.337	219.499				11	274.015	312.153	184.308						11	155.653	159.948	118.431				5		#DIV/0!	#DIV/0!				11	255.672	279.985	188.965				11	301.399	301.848	216.639				11	358.709	401.496	280.893
12	327.974						12	360.985								12	174.369						6							12	311.343						12	337.604						12	441.261
13	277.899						13	301.459								13	149.821						7							13	272.94						13	266.541						13	404.519
	Green							Green									Green							Green							Green							Green							Green
11	673.44	598.342	374.059				11	643.944	550.485	347.301						11	618.366	542.478	295.423				5		#DIV/0!	#DIV/0!				11	728.28	618.838	410.227				11	637.638	539.418	339.989				11	691.731	621.093	403.664
12	610.396						12	497.881								12	546.534						6							12	605.205						12	529.668						12	633.16
13	511.19						13	509.631								13	462.534						7							13	523.03						13	450.948						13	538.388
cnt10	Red						cnt10	Red								cnt10	Red						cnt10	Red						cnt10	Red						cnt10	Red						cnt10	Red
	Green							Green									Green							Green							Green							Green							Green
[truncated: 34 more columns]

## Sheet: s3_20B
	Baseline1							Baseline2									Bleach0							Bleach2							Bleach5							Bleach10							Bleach20
Sp1	Red	AVG	AVG-Bg	Norm B	Norm CNT	Norm 0		Red	AVG	AVG-Bg	Norm B	Norm CNT	Norm 0		Baseline T		Red	AVG	AVG-Bg	Norm B	Norm CNT	Norm 0		Red	AVG	AVG-Bg	Norm B	Norm CNT	Norm 0		Red	AVG	AVG-Bg	Norm B	Norm CNT	Norm 0		Red	AVG	AVG-Bg	Norm B	Norm CNT	Norm 0		Red	AVG	AVG-Bg	Norm B	Norm CNT
6	321.37	298.258	251.877	1.01455	1.00644	1.01739	6	312.282	313.723	244.652	0.98545	0.993457	0.982323		248.264	6	337.618	333.747	250.701	1.00981	1.17999	1.48626	4		#DIV/0!	#DIV/0!	#DIV/0!	#DIV/0!	#DIV/0!	5	339.21	426.371	375.946	1.51429	1.40591	2.09659	5	446.555	459.821	416.264	1.6767	1.63258	2.70894	6	363.748	359.651	327.922	1.32086	1.40742
7	353.252						7	353.555								7	379.891						5							6	486.105						6	536.34						7	427.134
8	220.151						8	275.332								8	283.731						6							7	453.798						7	396.567						8	288.071
	Green							Green									Green							Green							Green							Green							Green
6	487.429	434.368	323.155	1.09127	1.06692	1.18079	6	402.197	366.991	269.098	0.908727	0.929954	0.810767		296.127	6	233.769	239.941	153.153	0.517186	0.62984	0	4		#DIV/0!	#DIV/0!	#DIV/0!	#DIV/0!	#DIV/0!	5	369.723	336.27	244.972	0.827253	0.831449	0.544655	5	395.336	360.952	244.186	0.824598	0.91241	0.763372	6	305.714	298.139	192.355	0.649571	0.716423
7	440.298						7	365.672								7	257.219						5							6	344.496						6	363.492						7	293.765
8	375.378						8	333.105								8	228.836						6							7	294.592						7	324.029						8	294.937
Sp2	Red							Red									Red							Red							Red							Red							Red
8	374	389.04	342.659	1.04647	1.0381	1.15335	8	328.8	381.3	312.229	0.953534	0.961282	0.844162		327.444	8	394.258	428.75	345.704	1.05577	1.23369	1.94058	5		#DIV/0!	#DIV/0!	#DIV/0!	#DIV/0!	#DIV/0!	8	497.862	506.523	456.098	1.3929	1.29321	2.18014	8	389.854	470.447	426.891	1.30371	1.2694	2.08433	8	320.55	359.722	327.994	1.00168	1.06732
9	408.862						9	402.875								9	448.188						6							9	564.987						9	538.096						9	408.467
10	384.258						10	412.225								10	443.804						7							10	456.721						10	483.392						10	350.15
	Green							Green									Green							Green							Green							Green							Green
8	427.667	420.683	309.47	1.01179	0.989214	0.956588	8	377.879	400.149	302.256	0.988206	1.01129	1.04544		305.863	8	265.025	275.544	188.756	0.617126	0.751548	0	5		#DIV/0!	#DIV/0!	#DIV/0!	#DIV/0!	#DIV/0!	8	324.667	328.263	236.964	0.77474	0.77867	0.109162	8	334.717	331.435	214.668	0.701845	0.776584	0.100769	8	345.4	319.825	214.042	0.699796	0.771817
9	442.675						9	415.967								9	281.15						6							9	367.638						9	342.188						9	318.792
10	391.708						10	406.6								10	280.458						7							10	292.483						10	317.4						10	295.283
Sp3	Red							Red									Red							Red							Red							Red							Red
8	762.298	764.157	717.776	1.06741	1.05888	1.34745	8	658.121	696.189	627.119	0.932591	0.940168	0.646908		672.447	8	508.492	535.261	452.215	0.672491	0.785823	-0.263949	3		#DIV/0!	#DIV/0!	#DIV/0!	#DIV/0!	#DIV/0!	8	892.004	895.728	845.303	1.25705	1.16708	1.98603	8	684.754	758.198	714.641	1.06275	1.03478	1.20527	9	693.327	695.032	663.304	0.986402	1.05104
9	790.96						9	732.137								9	563.633						4							9	922.754						9	811.468						10	735.411
10	739.214						10	698.31								10	533.657						5							10	872.427						10	778.371						11	656.359
	Green							Green									Green							Green							Green							Green							Green
8	433.984	414.125	302.912	1.08849	1.06419	1.37884	8	346.052	351.556	253.663	0.911515	0.932807	0.603466		278.288	8	277.44	276.58	189.791	0.681997	0.830549	0	3		#DIV/0!	#DIV/0!	#DIV/0!	#DIV/0!	#DIV/0!	8	359.129	373.3	282.001	1.01334	1.01848	1.10908	8	319.746	328.015	211.248	0.7591	0.839936	0.0553951	9	322.536	342.685	236.902	0.851285	0.938898
9	428.121						9	347.871								9	278.331						4							9	360.81						9	318.302						10	354.173
10	380.27						10	360.746								10	273.968						5							10	399.96						10	345.996						11	351.347
Sp4	Red							Red									Red							Red							Red							Red							Red
6	639.563	565.17	518.789	1.00961	1.00153	1.00269	6	566.892	577.987	508.917	0.990394	0.998441	0.99727		513.853	6	318.734	313.318	230.272	0.448129	0.523651	0.165878	3		#DIV/0!	#DIV/0!	#DIV/0!	#DIV/0!	#DIV/0!	6	452.108	451.979	401.554	0.781457	0.725526	0.519376	6	463.883	491.246	447.689	0.87124	0.848317	0.734392	6	442.231	426.335	394.607	0.767938	0.818261
7	596.873						7	630.88								7	330.101						4							7	497.022						7	556.066						7	480.297
8	459.073						8	536.19								8	291.12						5							8	406.807						8	453.788						8	356.478
	Green							Green									Green							Green							Green							Green							Green
6	645.44	640.565	529.352	1.0276	1.00467	1.00818	6	561.449	598.807	500.914	0.972397	0.995111	0.99144		515.133	6	270.832	268.22	181.432	0.352204	0.428921	0	3		#DIV/0!	#DIV/0!	#DIV/0!	#DIV/0!	#DIV/0!	6	383.953	369.571	278.273	0.540195	0.542935	0.199647	6	385.234	412.022	295.256	0.573164	0.6342	0.359458	6	460.082	427.747	321.963	0.62501	0.689335
7	640.104						7	617.649								7	271.725						4							7	363.763						7	417.956						7	440.62
8	636.152						8	617.323								8	262.104						5							8	360.997						8	432.877						8	382.538
Sp5	Red							Red									Red							Red							Red							Red							Red
5	446.813	492.942	446.561	1.03366	1.0254	1.04594	6	483.725	486.547	417.476	0.966338	0.974189	0.95331		432.018	6	351.494	359.899	276.853	0.640836	0.748834	0.545649	4		#DIV/0!	#DIV/0!	#DIV/0!	#DIV/0!	#DIV/0!	6	537.266	560.382	509.957	1.1804	1.09592	1.17352	6	544.453	560.392	516.835	1.19633	1.16485	1.29821	6	423.092	441.493	409.764	0.948488	1.01064
6	536.038						7	512.054								7	375.212						5							7	613.924						7	580.646						7	462.497
7	495.975						8	463.861								8	352.991						6							8	529.956						8	556.076						8	438.889
	Green							Green									Green							Green							Green							Green							Green
5	657.756	694.732	583.519	1.00974	0.987209	0.976861	6	651.684	670.152	572.259	0.990258	1.01339	1.02422		577.889	6	305.082	298.996	212.207	0.367211	0.447197	0	4		#DIV/0!	#DIV/0!	#DIV/0!	#DIV/0!	#DIV/0!	6	436.133	463.751	372.453	0.644505	0.647775	0.362837	6	455.316	485.782	369.015	0.638557	0.706557	0.469172	6	442.611	453.413	347.63	0.601552	0.663462
6	722.934						7	699.373								7	306.351						5							7	465.085						7	512.839						7	460.683
7	703.506						8	659.399								8	285.554						6							8	490.035						8	489.19						8	456.946
Sp6	Red							Red									Red							Red							Red							Red							Red
6	436.915	508.249	461.868	0.967432	0.959698	0.906008	7	546.908	562.036	492.965	1.03257	1.04096	1.09552		477.416	7	457.864	453.678	370.632	0.776329	0.907161	0.783484	5		#DIV/0!	#DIV/0!	#DIV/0!	#DIV/0!	#DIV/0!	8	645.424	523.884	473.459	0.99171	0.920731	0.815131	8	610.532	536.96	493.403	1.03349	1.00629	1.01468	7	468.598	524.097	492.368	1.03132	1.0989
7	552.047						8	599.652								8	485.557						6							9	523.804						9	565.19						8	573.117
8	535.785						9	539.547								9	417.614						7							10	402.424						10	435.158						9	530.576
	Green							Green									Green							Green							Green							Green							Green
6	586.984	625.747	514.534	0.999173	0.976875	0.946068	7	645.744	613.279	515.386	1.00083	1.02421	1.05645		514.96	7	323.706	328.328	241.54	0.469046	0.571213	0	5		#DIV/0!	#DIV/0!	#DIV/0!	#DIV/0!	#DIV/0!	8	480.987	420.515	329.216	0.639305	0.642548	0.166364	8	472.642	450.58	333.813	0.648232	0.717262	0.34061	7	482.462	482.998	377.215	0.732513	0.807902
7	643.326						8	622.516								8	334.968						6							9	379.335						9	457.661						8	502.788
8	646.93						9	571.576								9	326.31						7							10	401.222						10	421.437						9	463.744
Sp7	Red							Red									Red							Red							Red							Red							Red
6	552.193	593.875	547.494	1.04297	1.03463	1.06035	6	467.433	571.45	502.379	0.957028	0.964803	0.938674		524.937	7	289.655	297.968	214.922	0.409424	0.478423	0.0912141	4		#DIV/0!	#DIV/0!	#DIV/0!	#DIV/0!	#DIV/0!	7	377.441	413.514	363.089	0.691681	0.642175	0.376534	7	324.273	369.894	326.337	0.621669	0.605312	0.312304	7	258.752	289.945	258.217	0.491901	0.524135
7	677.941						7	627.021								8	311.966						5							8	424.794						8	399.542						8	299.878
8	551.492						8	619.895								9	292.282						6							9	438.307						9	385.866						9	311.206
	Green							Green									Green							Green							Green							Green							Green
6	1061.75	1109.06	997.851	1.01944	0.996694	0.99424	6	937.265	1057.68	959.786	0.980556	1.00346	1.00603		978.819	7	435.223	429.243	342.454	0.349865	0.426072	0	4		#DIV/0!	#DIV/0!	#DIV/0!	#DIV/0!	#DIV/0!	7	638.038	594.35	503.052	0.513938	0.516545	0.157637	7	676.45	629.038	512.271	0.523357	0.579089	0.266613	7	582.445	599.445	493.662	0.504344	0.55625
7	1218.09						7	1154.3								8	458.45						5							8	609.244						8	657.441						8	653.281
8	1047.35						8	1081.47								9	394.055						6							9	535.769						9	553.223						9	562.609
Sp8	Red							Red									Red							Red							Red							Red							Red
6	277.935	273.6	227.219	0.996425	0.988458	0.95094	6	280.553	297.92	228.85	1.00358	1.01173	1.04986		228.034	6	403.529	422.73	339.684	1.48962	1.74066	4.14833	3		#DIV/0!	#DIV/0!	#DIV/0!	#DIV/0!	#DIV/0!	6	303.871	355.123	304.697	1.33619	1.24056	2.02254	7	328.926	351.426	307.87	1.3501	1.31458	2.33719	7	282.074	292.96	261.231	1.14558	1.22065
7	294.668						7	319.076								7	463.679						4							7	396.426						8	391.006						8	317.188
8	248.197						8	294.132								8	400.982						5							8	365.071						9	334.347						9	279.618
	Green							Green									Green							Green							Green							Green							Green
6	359.753	350.043	238.83	1.00376	0.98136	0.920768	6	312.738	334.933	237.04	0.996239	1.01951	1.08293		237.935	6	248.447	236.203	149.414	0.627963	0.764746	0	3		#DIV/0!	#DIV/0!	#DIV/0!	#DIV/0!	#DIV/0!	6	258.529	269.062	177.763	0.747108	0.750898	-0.0588655	7	335.062	331.987	215.221	0.904535	1.00086	1.00365	7	329.559	328.461	222.677	0.935874	1.03219
7	365.747						7	351.294								7	247.691						4							7	287.741						8	337.932						8	340.394
8	324.629						8	340.768								8	212.471						5							8	260.915						9	322.968						9	315.429
Sp9	Red							Red									Red							Red							Red							Red							Red
5		#DIV/0!	#DIV/0!	#DIV/0!	#DIV/0!	#DIV/0!	5		#DIV/0!	#DIV/0!	#DIV/0!	#DIV/0!	#DIV/0!		#DIV/0!	3		#DIV/0!	#DIV/0!	#DIV/0!	#DIV/0!	#DIV/0!	3		#DIV/0!	#DIV/0!	#DIV/0!	#DIV/0!	#DIV/0!	2		#DIV/0!	#DIV/0!	#DIV/0!	#DIV/0!	#DIV/0!	60		#DIV/0!	#DIV/0!	#DIV/0!	#DIV/0!	#DIV/0!	2		#DIV/0!	#DIV/0!	#DIV/0!	#DIV/0!
6							6									4							4							3							90							3
7							7									5							5							4							120							4
	Green							Green									Green							Green							Green							Green							Green
5		#DIV/0!	#DIV/0!	#DIV/0!	#DIV/0!	#DIV/0!	5		#DIV/0!	#DIV/0!	#DIV/0!	#DIV/0!	#DIV/0!		#DIV/0!	3		#DIV/0!	#DIV/0!	#DIV/0!	#DIV/0!	#DIV/0!	3		#DIV/0!	#DIV/0!	#DIV/0!	#DIV/0!	#DIV/0!	2		#DIV/0!	#DIV/0!	#DIV/0!	#DIV/0!	#DIV/0!	60		#DIV/0!	#DIV/0!	#DIV/0!	#DIV/0!	#DIV/0!	2		#DIV/0!	#DIV/0!	#DIV/0!	#DIV/0!
6							6									4							4							3							90							3
7							7									5							5							4							120							4
Sp10	Red							Red									Red							Red							Red							Red							Red
															#DIV/0!
	Green							Green									Green							Green							Green							Green							Green
															#DIV/0!
		AVG RED	#DIV/0!	AVG GRN	#DIV/0!				AVG RED	#DIV/0!	AVG GRN	#DIV/0!						AVG RED	#DIV/0!	AVG GRN	#DIV/0!				AVG RED	#DIV/0!	AVG GRN	#DIV/0!				AVG RED	#DIV/0!	AVG GRN	#DIV/0!				AVG RED	#DIV/0!	AVG GRN	#DIV/0!				AVG RED	#DIV/0!	AVG GRN	#DIV/0!
		AVG RED0	#DIV/0!	AVG GRN0	#DIV/0!				AVG RED0	#DIV/0!	AVG GRN0	#DIV/0!						AVG RED0	#DIV/0!	AVG GRN0	#DIV/0!				AVG RED0	#DIV/0!	AVG GRN0	#DIV/0!				AVG RED0	#DIV/0!	AVG GRN0	#DIV/0!				AVG RED0	#DIV/0!	AVG GRN0	#DIV/0!				AVG RED0	#DIV/0!	AVG GRN0	#DIV/0!
bg1	Red	AVG	AVG Total				bg1	Red	AVG	AVG Total						bg1	Red	AVG	AVG Total				bg1	Red	AVG	AVG Total				bg1	Red	AVG	AVG Total				bg1	Red	AVG	AVG Total				bg1	Red	AVG	AVG Total
5	41.6235	40.0673	46.381				5	60.7686	59.5464	69.0708						5	68.1529	71.1	83.046				3		#DIV/0!	#DIV/0!				5	49.2784	43.5765	50.4255				5	35.9804	35.951	43.5567				5	32.9137	30.8078	31.7285
6	40.3333						6	60.851								6	71.9686						4							6	46.1608						6	35.5922						6	28.6157
7	43.7843						7	62.4078								7	73.6745						5							7	47.3098						7	34.451						7	29.8784
8	43.2588						8	57.702								8	71.5804						6							8	42.3804						8	35.0314						8	33.8118
9	33.702						9	57.2471								9	70.4196						7							9	38.1294						9	37.3333						9	29.7412
10	37.702						10	58.302								10	70.8039						8							10	38.2						10	37.3177						10	29.8863
	Green							Green									Green							Green							Green							Green							Green
5	97.1725	105.129	111.213				5	97.8314	98.7765	97.893						5	96.4667	81.9732	86.7885				3		#DIV/0!	#DIV/0!				5	89.098	85.5379	91.2985				5	111.596	113.925	116.767				5	101.18	108.131	105.783
6	89.7765						6	92.6902								6	98.0471						4							6	87.0667						6	115.8						6	106.172
7	110.42						7	98.9608								7	86.8431						5							7	78.5686						7	107.792						7	108.177
8	102.639						8	107.016								8	73.2235						6							8	78.7176						8	110.859						8	119.196
9	118.878						9	101.725								9	70.7726						7							9	90.298						9	118.082						9	108.565
10	111.89						10	94.4353								10	66.4863						8							10	89.4784						10	119.424						10	105.498
bg2	Red						bg2	Red								bg2	Red						bg2	Red						bg2	Red						bg2	Red						bg2	Red
5	18.8549	21.002					5	47.749	46.681							5	60.4902	60.0392					3		#DIV/0!					5	32.8	30.0242					5	23.1412	22.7987					5	16.0471	13.8079
6	20.9176						6	47.6823								6	59.0902						4							6	29.0706						6	21.6196						6	14.3529
7	22.6431						7	47.7294								7	58.5569						5							7	29.3412						7	22.9961						7	15.5882
8	23.1726						8	45.9804								8	59.2353						6							8	29.698						8	23.9098						8	11.8314
9	21.0824						9	45.0706								9	60.7255						7							9	29.2588						9	22.8039						9	11.651
10	19.3412						10	45.8745								10	62.1373						8							10	29.9765						10	22.3216						10	13.3765
	Green							Green									Green							Green							Green							Green							Green
5	86.6078	94.1281					5	86	80.8784							5	67.9373	69.5732					3		#DIV/0!					5	82.1294	78.7647					5	99.3608	93.381					5	83.4627	93.6117
6	94.6706						6	76.5608								6	64.4314						4							6	74.0235						6	98.6902						6	95.1216
7	90.9059						7	74.3647								7	66.6078						5							7	73.5843						7	91.7882						7	98.298
8	86.5333						8	80.949								8	68.5922						6							8	76.4078						8	85.0627						8	96.6627
9	104.082						9	81								9	79.4353						7							9	87.4314						9	91.4431						9	96.1647
10	101.969						10	86.3961								10	70.4353						8							10	79.0118						10	93.9412						10	91.9608
bg3	Red						bg3	Red								bg3	Red						bg3	Red						bg3	Red						bg3	Red						bg3	Red
5	78.6549	78.0739					5	100.498	100.985							5	110.424	117.999					3		#DIV/0!					5	70.2392	77.6758					5	67.6706	71.9203					5	54.7922	50.5699
6	79.6549						6	100.655								6	115						4							6	77.4431						6	72.9294						6	50.0353
7	84.4667						7	99.1255								7	120.694						5							7	81.2588						7	69.4275						7	51.2549
8	77.2745						8	101.208								8	119.29						6							8	74.4157						8	68.5373						8	47.4078
9	77.9608						9	103.765								9	120.8						7							9	77.1529						9	75.5922						9	47.7294
10	70.4314						10	100.659								10	121.784						8							10	85.5451						10	77.3647						10	52.2
	Green							Green									Green							Green							Green							Green							Green
5	128.577	134.382					5	110.714	114.024							5	103.996	108.819					3		#DIV/0!					5	108.749	109.593					5	150.404	142.993					5	135.039	115.607
6	133.729						6	107.518								6	108.961						4							6	108.996						6	141.165						6	117.702
7	134.251						7	112.984								7	112.259						5							7	107.722						7	136.671						7	105.627
8	145.957						8	115.984								8	112.91						6							8	110.353						8	138.518						8	111.075
9	136.31						9	117.769								9	103.051						7							9	103.616						9	141.318						9	106.302
10	127.467						10	119.177								10	111.737						8							10	118.122						10	149.886						10	117.898
	Baseline1							Baseline2									Bleach0							Bleach2							Bleach5							Bleach10							Bleach15
cnt1	Red	AVG	AVG-Bg	AVG total	Norm B		cnt1	Red	AVG	AVG-Bg	AVG total	Norm B			Baseline T	cnt1	Red	AVG	AVG-Bg	AVG total	Norm B		cnt1	Red	AVG	AVG-Bg	AVG total	Norm B		cnt1	Red	AVG	AVG-Bg	AVG total	Norm B		cnt1	Red	AVG	AVG-Bg	AVG total	Norm B		cnt1	Red	AVG	AVG-Bg	AVG total	Norm B
4	542.288	555.111	508.73	582.597	1.00806		4	488.179	574.372	505.302	573.281	0.991941			577.939	4	526.582	575.349	492.303	494.588	0.855779		6		#DIV/0!	#DIV/0!	#DIV/0!	#DIV/0!		4	603.335	633.626	583.201	622.492	1.07709		4	544.141	654.589	611.032	593.556	1.02702		4	424.438	510.706	478.977	542.396	0.9385
5	639.224						5	661.55								5	639.021						7							5	714.438						5	741.388						5	585.659
6	483.821						6	573.388								6	560.444						8							6	583.106						6	678.238						6	522.021
	Green							Green									Green							Green							Green							Green							Green
4	599.994	599.843	488.63	535.56	1.02283		4	479.062	529.68	431.787	511.657	0.977174			523.608	4	447.944	498.145	411.357	429.955	0.821139		6		#DIV/0!	#DIV/0!	#DIV/0!	#DIV/0!		4	513.732	537.818	446.519	520.966	0.994953		4	473.906	545.671	428.904	473.216	0.903759		4	478.406	515.208	409.424	474.748	0.906686
5	637.182						5	561.209								5	520.615						7							5	572.406						5	565.518						5	533.441
6	562.353						6	548.768								6	525.876						8							6	527.315						6	597.588						6	533.776
cnt2	Red						cnt2	Red								cnt2	Red						cnt2	Red						cnt2	Red						cnt2	Red						cnt2	Red
2	479.947	556.212	509.831				3	539.715	524.289	455.219						3	602.179	562.081	479.035				4		#DIV/0!	#DIV/0!				3	669.329	599.86	549.434				2	445.5	536.42	492.863				3	533.685	512.007	480.278
3	625.006						4	575.597								4	600.462						5							4	636.441						3	588.274						4	561.5
4	563.682						5	457.556								5	483.603						6							5	493.809						4	575.485						5	440.835
	Green							Green									Green							Green							Green							Green							Green
2	469.306	503.505	392.292				3	483.324	471.422	373.529						3	432.729	420.82	334.031				4		#DIV/0!	#DIV/0!				3	521.997	478.606	387.307				2	472.365	488.462	371.695				3	448.888	449.362	343.578
3	539.306						4	487.424								4	426.894						5							4	466.091						3	508.768						4	471.9
4	501.903						5	443.518								5	402.835						6							5	447.729						4	484.253						5	427.297
cnt3	Red						cnt3	Red								cnt3	Red						cnt3	Red						cnt3	Red						cnt3	Red						cnt3	Red
3	484.243	435.584	389.203				3	389.094	408.537	339.466						3	426.056	420.264	337.218				4		#DIV/0!	#DIV/0!				3	453.903	454.297	403.872				3	393.319	381.002	337.445				3	381.51	376.914	345.186
4	468.031						4	445.198								4	456.674						5							4	521.236						4	401.656						4	410.698
5	354.479						5	391.319								5	378.062						6							5	387.753						5	348.031						5	338.535
	Green							Green									Green							Green							Green							Green							Green
3	540.76	541.353	430.14				3	483.597	490.226	392.333						3	396.715	436.212	349.424				4		#DIV/0!	#DIV/0!				3	512.75	497.229	405.931				3	444.24	479.924	363.157				3	452.99	447.866	342.083
4	562.608						4	511.642								4	461.431						5							4	526.681						4	499.413						4	453.771
5	520.691						5	475.438								5	450.49						6							5	452.257						5	496.118						5	436.837
cnt4	Red						cnt4	Red								cnt4	Red						cnt4	Red						cnt4	Red						cnt4	Red						cnt4	Red
2	649.988	695.63	649.249				3	719.704	679.327	610.257						3	579.534	531.118	448.072				5		#DIV/0!	#DIV/0!				3	642.997	647.755	597.33				3	577.558	540.09	496.534				3	606.921	634.441	602.712
3	783.219						4	720.662								4	553.695						6							4	695.311						4	570.878						4	689.896
4	653.683						5	597.616								5	460.125						7							5	604.957						5	471.835						5	606.506
	Green							Green									Green							Green							Green							Green							Green
2	1223.19	1256.35	1145.14				3	1263.94	1184.01	1086.12						3	1011.57	910.565	823.777				5		#DIV/0!	#DIV/0!				3	1166.59	1200.62	1109.32				3	1051.6	1026.36	909.591				3	1229.74	1237.2	1131.41
3	1397.72						4	1250.38								4	964.631						6							4	1306.03						4	1121.73						4	1326.17
4	1148.15						5	1037.72								5	755.494						7							5	1129.25						5	905.744						5	1155.68
cnt5	Red						cnt5	Red								cnt5	Red						cnt5	Red						cnt5	Red						cnt5	Red						cnt5	Red
2	597.386	660.903	614.522				2	508.241	594.553	525.482						2	353.965	403.88	320.834				5		#DIV/0!	#DIV/0!				2	584.746	599.654	549.228				2	437.934	503.3	459.743				2	424.43	504.126	472.397
3	732.399						3	657.965								3	445.189						6							3	650.943						3	550.724						3	550.645
4	652.925						4	617.452								4	412.487						7							4	563.272						4	521.241						4	537.303
	Green							Green									Green							Green							Green							Green							Green
2	414.175	446.481	335.268				2	389.237	416.623	318.73						2	318.987	346.114	259.326				5		#DIV/0!	#DIV/0!				2	423.232	431.769	340.47				2	355.627	372.259	255.492				2	387.482	396.621	290.838
3	486.368						3	435.096								3	342.408						6							3	429.039						3	387.259						3	405.202
4	438.899						4	425.535								4	376.947						7							4	443.035						4	373.89						4	397.18
cnt6	Red						cnt6	Red								cnt6	Red						cnt6	Red						cnt6	Red						cnt6	Red						cnt6	Red
2	696.491	659.498	613.117				2	714.092	768.202	699.131						2	470.478	480.414	397.368				7		#DIV/0!	#DIV/0!				2	742.215	696.655	646.23				2	659.425	754.912	711.355				2	524.066	570.949	539.22
3	741.579						3	822.039								3	530.974						8							3	748.991						3	842.491						3	635.193
4	540.425						4	768.474								4	439.789						9							4	598.759						4	762.82						4	553.588
	Green							Green									Green							Green							Green							Green							Green
2	669.162	668.817	557.604				2	589.465	639.876	541.983						2	508.167	526.556	439.767				7		#DIV/0!	#DIV/0!				2	663.781	626.724	535.425				2	682.825	702.752	585.985				2	574.035	585.118	479.335
3	738.412						3	677.904								3	580.952						8							3	655.022						3	746.965						3	647.57
4	598.877						4	652.259								4	490.548						9							4	561.368						4	678.465						4	533.75
cnt7	Red						cnt7	Red								cnt7	Red						cnt7	Red						cnt7	Red						cnt7	Red						cnt7	Red
2	606.824	662.769	616.388				3	724.296	700.421	631.35						2	405.042	467.363	384.317				6		#DIV/0!	#DIV/0!				2	607.657	632.592	582.167				2	497.792	600.11	556.553				2	447.5	517.474	485.745
3	756.102						4	750.574								3	514.324						7							3	695.023						3	663.722						3	590.667
4	625.38						5	626.393								4	482.722						8							4	595.097						4	638.815						4	514.255
	Green							Green									Green							Green							Green							Green							Green
2	800.398	793.224	682.011				3	859.241	790.216	692.323						2	597.477	628.647	541.859				6		#DIV/0!	#DIV/0!				2	759.393	747.873	656.575				2	680.662	720.245	603.479				2	701.782	696.537	590.754
3	821.315						4	830.31								3	668.232						7							3	777.264						3	754.116						3	719.611
4	757.958						5	681.097								4	620.232						8							4	706.963						4	725.958						4	668.218
cnt8	Red						cnt8	Red								cnt8	Red						cnt8	Red						cnt8	Red						cnt8	Red						cnt8	Red
10	792.799	771.009	724.628				11	765.909	739.039	669.969						10	723.227	752.122	669.076				5		#DIV/0!	#DIV/0!				11	764.712	770.384	719.959				11	788.235	754.768	711.211				11	685.144	644.381	612.653
11	823.864						12	784.879								11	792.151						6							12	847.849						12	801.962						12	665.205
12	696.364						13	666.33								12	740.989						7							13	698.591						13	674.106						13	582.795
	Green							Green									Green							Green							Green							Green							Green
10	558.064	566.714	455.501				11	493.178	520.463	422.57						10	419.811	456.63	369.842				5		#DIV/0!	#DIV/0!				11	490.966	529.853	438.555				11	526.352	533.591	416.824				11	439.231	472.38	366.597
11	576.886						12	520.284								11	461.303						6							12	547.367						12	554.833						12	512.795
12	565.193						13	547.928								12	488.777						7							13	551.227						13	519.587						13	465.114
cnt9	Red						cnt9	Red								cnt9	Red						cnt9	Red						cnt9	Red						cnt9	Red						cnt9	Red
10	591.106	664.084	617.703				11	756.587	792.428	723.357						11	1035.83	1006.12	923.07				5		#DIV/0!	#DIV/0!				11	1097.62	1021.44	971.013				11	954.439	1008.83	965.27				11	936.553	896.12	864.391
11	727.511						12	866.542								12	1073.45						6							12	1117.08						12	1113.8						12	979.246
12	673.636						13	754.155								13	909.061						7							13	849.614						13	958.242						13	772.561
	Green							Green									Green							Green							Green							Green							Green
10	420.602	444.668	333.455				11	432.777	443.427	345.534						11	416.924	427.006	340.218				5		#DIV/0!	#DIV/0!				11	462.117	459.885	368.587				11	404.125	440.581	323.814				11	403.189	424.496	318.713
11	472.14						12	448.458								12	432.72						6							12	469.856						12	459.189						12	448.129
12	441.261						13	449.045								13	431.375						7							13	447.682						13	458.428						13	422.17
cnt10	Red						cnt10	Red								cnt10	Red						cnt10	Red						cnt10	Red						cnt10	Red						cnt10	Red
	Green							Green									Green							Green							Green							Green							Green
[truncated: 34 more columns]

## Sheet: s4_20B
	Baseline1							Baseline2									Bleach0							Bleach2							Bleach5							Bleach10							Bleach20
Sp1	Red	AVG	AVG-Bg	Norm B	Norm CNT	Norm 0		Red	AVG	AVG-Bg	Norm B	Norm CNT	Norm 0		Baseline T		Red	AVG	AVG-Bg	Norm B	Norm CNT	Norm 0		Red	AVG	AVG-Bg	Norm B	Norm CNT	Norm 0		Red	AVG	AVG-Bg	Norm B	Norm CNT	Norm 0		Red	AVG	AVG-Bg	Norm B	Norm CNT	Norm 0		Red	AVG	AVG-Bg	Norm B	Norm CNT
8	240.746	267.808	190.616	0.94674	0.945468	0.313851	8	300.734	310.734	212.063	1.05326	1.05468	1.688		201.339	8	477.412	514.861	413.884	2.05565	2.36117	18.1268	4		#DIV/0!	#DIV/0!	#DIV/0!	#DIV/0!	#DIV/0!	7	538.61	614.231	552.529	2.74426	2.96119	25.6766	8	242.847	253.896	177.553	0.881861	0.998396	0.979816	7	189.893	245.446	185.356	0.920615	1.06197
9	304.746						9	356.881								9	597.701						5							8	690.169						9	284.215						8	277.395
10	257.932						10	274.588								10	469.469						6							9	613.915						10	234.627						9	269.051
	Green							Green									Green							Green							Green							Green							Green
8	388.492	381.134	222.554	0.926922	0.903743	-0.211141	8	408.328	387.727	257.645	1.07308	1.10132	2.2749		240.099	8	393.486	405.885	221.39	0.922076	0.920524	0	4		#DIV/0!	#DIV/0!	#DIV/0!	#DIV/0!	#DIV/0!	7	290.644	312.486	168.148	0.700328	0.714443	-2.593	8	317.712	287.659	111.324	0.463658	0.464131	-5.74253	7	285.627	305.281	118.751	0.494591	0.523813
9	373.847						9	398.627								9	451.814						5							8	339.023						9	279.192						8	322.023
10	381.062						10	356.226								10	372.356						6							9	307.791						10	266.074						9	308.192
Sp2	Red							Red									Red							Red							Red							Red							Red
8	519.49	444.688	367.496	0.995704	0.994366	0.983262	7	404.797	469.339	370.667	1.0043	1.00565	1.01678		369.081	8	442.062	394.095	293.119	0.794184	0.912219	0.739238	5		#DIV/0!	#DIV/0!	#DIV/0!	#DIV/0!	#DIV/0!	8	352.568	322.033	260.33	0.705347	0.761103	0.290338	8	335.849	371.168	294.825	0.798809	0.904368	0.715918	7	248.151	313.804	253.714	0.687419	0.792968
9	476.25						8	520.938								9	424.781						6							9	346.031						9	430.286						8	363.042
10	338.323						9	482.281								10	315.443						7							10	267.5						10	347.37						9	330.219
	Green							Green									Green							Green							Green							Green							Green
8	423.141	428.04	269.46	1.00173	0.97668	0.930725	7	377.052	398.611	268.53	0.998271	1.02455	1.07292		268.995	8	371.766	363.238	178.743	0.664483	0.663365	0	5		#DIV/0!	#DIV/0!	#DIV/0!	#DIV/0!	#DIV/0!	8	309.635	322.356	178.018	0.661791	0.675129	0.0349449	8	315.24	340.568	164.233	0.610543	0.611166	-0.155063	7	325.391	348.155	161.625	0.600848	0.636348
9	450.88						8	423.438								9	360.266						6							9	329.062						9	358.891						8	348.724
10	410.099						9	395.344								10	357.682						7							10	328.37						10	347.573						9	370.349
Sp3	Red							Red									Red							Red							Red							Red							Red
7	162.281	155.258	78.0664	0.852462	0.851316	0.163414	7	221.812	203.76	105.089	1.14754	1.14908	1.83884		91.5776	7	197.969	207.295	106.319	1.16097	1.33351	2.87655	3		#DIV/0!	#DIV/0!	#DIV/0!	#DIV/0!	#DIV/0!	8	179.13	167.479	105.776	1.15505	1.24635	2.38612	8	174.276	178.825	102.482	1.11907	1.26695	2.50204	8	125.734	114.09	53.9997	0.589661	0.680199
8	161.312						8	211.417								8	213.396						4							9	182.755						9	194.625						9	118.427
9	142.182						9	178.052								9	210.521						5							10	140.552						10	167.573						10	98.109
	Green							Green									Green							Green							Green							Green							Green
7	523.531	497.91	339.33	1.03342	1.00758	1.04266	7	471.109	447.462	317.38	0.966577	0.992019	0.955096		328.355	7	500.594	454.948	270.453	0.823659	0.822273	0	3		#DIV/0!	#DIV/0!	#DIV/0!	#DIV/0!	#DIV/0!	8	396.438	382.743	238.406	0.726061	0.740695	-0.459013	8	458.562	432.713	256.378	0.780796	0.781593	-0.228896	8	424.557	404.847	218.317	0.664883	0.704166
8	493.708						8	454.932								8	446.125						4							9	391.266						9	430.193						9	399.208
9	476.49						9	416.344								9	418.125						5							10	360.526						10	409.385						10	390.776
Sp4	Red							Red									Red							Red							Red							Red							Red
7	321.333	368.533	291.341	0.943843	0.942575	0.842093	7	430.688	424.681	326.009	1.05616	1.05758	1.15833		308.675	7	264.292	319.752	218.775	0.708757	0.814094	0.488798	3		#DIV/0!	#DIV/0!	#DIV/0!	#DIV/0!	#DIV/0!	6	204.677	285.606	223.903	0.725368	0.782707	0.402491	7	244.672	294.544	218.201	0.706895	0.800308	0.450891	7	257.74	307.434	247.344	0.801308	0.924344
8	427.255						8	482.974								8	373.396						4							7	337.333						8	319.193						8	368.479
9	357.01						9	360.38								9	321.568						5							8	314.807						9	319.766						9	296.083
	Green							Green									Green							Green							Green							Green							Green
7	481.38	421.069	262.489	1.0599	1.0334	1.09184	7	429.484	362.901	232.819	0.940099	0.964844	0.903329		247.654	7	366.557	342.352	157.857	0.637408	0.636336	0	3		#DIV/0!	#DIV/0!	#DIV/0!	#DIV/0!	#DIV/0!	6	332.115	345.261	200.923	0.811304	0.827656	0.52609	7	434.656	410.837	234.501	0.94689	0.947856	0.856616	7	452.385	401.085	214.555	0.866351	0.917537
8	439.802						8	366.917								8	343.01						4							7	369.203						8	425.182						8	373.151
9	342.026						9	292.302								9	317.49						5							8	334.464						9	372.672						9	377.719
Sp5	Red							Red									Red							Red							Red							Red							Red
8	315.297	300.54	223.348	0.970553	0.969249	0.925147	8	358.521	335.573	236.901	1.02945	1.03083	1.07505		230.125	9	262.479	247.642	146.666	0.637332	0.732054	0.347788	4		#DIV/0!	#DIV/0!	#DIV/0!	#DIV/0!	#DIV/0!	8	257.036	275.592	213.889	0.929449	1.00292	1.00711	9	262.609	280.332	203.989	0.886428	1.00357	1.00868	9	221.031	230.099	170.008	0.738767	0.852199
9	330.156						9	371.385								10	264.484						5							9	304.786						10	319.438						10	265.453
10	256.167						10	276.812								11	215.964						6							10	264.953						11	258.948						11	203.812
	Green							Green									Green							Green							Green							Green							Green
8	441.734	442.975	284.395	1.06159	1.03504	1.08529	8	381.839	381.479	251.398	0.938414	0.963115	0.910217		267.896	9	368.068	342.599	158.104	0.590167	0.589174	0	4		#DIV/0!	#DIV/0!	#DIV/0!	#DIV/0!	#DIV/0!	8	314.745	329.738	185.4	0.692059	0.706008	0.284388	9	344.807	355.545	179.21	0.668953	0.669635	0.195852	9	362.005	368.385	181.856	0.678829	0.718936
9	445.182						9	378.089								10	342.318						5							9	343.375						10	357.141						10	353.083
10	442.01						10	384.51								11	317.411						6							10	331.094						11	364.688						11	390.068
Sp6	Red							Red									Red							Red							Red							Red							Red
6	278.781	357.62	280.428	0.874234	0.873059	0.670379	6	407.87	459.783	361.111	1.12577	1.12728	1.33051		320.77	7	216.589	253.17	152.194	0.474464	0.544981	-0.181526	5		#DIV/0!	#DIV/0!	#DIV/0!	#DIV/0!	#DIV/0!	6	234.333	293.856	232.153	0.723737	0.780948	0.431197	7	292.75	357.439	281.096	0.876318	0.99212	0.979538	8	356.26	361.937	301.847	0.941009	1.08549
7	404.172						7	515.094								8	273.833						6							7	331.354						8	402.531						9	398.521
8	389.906						8	456.385								9	269.089						7							8	315.88						9	377.036						10	331.031
	Green							Green									Green							Green							Green							Green							Green
6	525.958	549.859	391.279	1.02122	0.995685	0.988794	6	510.354	505.099	375.017	0.978779	1.00454	1.0118		383.148	7	425.74	420.486	235.991	0.615925	0.614888	0	5		#DIV/0!	#DIV/0!	#DIV/0!	#DIV/0!	#DIV/0!	6	421.703	404.253	259.916	0.678368	0.692041	0.200337	7	485.312	450.181	273.846	0.714725	0.715454	0.261133	8	410.458	403.738	217.208	0.566904	0.600399
7	568.042						7	514.417								8	416.635						6							7	431.25						8	445.214						9	413.188
8	555.578						8	490.526								9	419.083						7							8	359.807						9	420.016						10	387.568
Sp7	Red							Red									Red							Red							Red							Red							Red
8	350.208	335.582	258.39	1.01892	1.01755	1.44893	8	379.969	347.465	248.794	0.98108	0.982402	0.549864		253.592	8	334.073	370.113	269.136	1.0613	1.21903	6.60249	4		#DIV/0!	#DIV/0!	#DIV/0!	#DIV/0!	#DIV/0!	8	515.766	440.446	378.743	1.49352	1.61158	16.6433	9	415.531	359.535	283.192	1.11672	1.26429	7.76029	9	266.401	263.79	203.7	0.803258	0.926593
9	354.297						9	389.344								9	370.109						5							9	461.76						10	379.292						10	296.63
10	302.24						10	273.083								10	406.156						6							10	343.812						11	283.781						11	228.339
	Green							Green									Green							Green							Green							Green							Green
8	344.891	317.186	158.606	1.08589	1.05874	2.50251	8	259.995	263.596	133.514	0.914106	0.938167	-0.581607		146.06	8	329.391	325.082	140.586	0.962525	0.960905	0	4		#DIV/0!	#DIV/0!	#DIV/0!	#DIV/0!	#DIV/0!	8	310.974	294.708	150.371	1.02951	1.05026	2.28568	9	310.438	329.5	153.165	1.04864	1.04971	2.27162	9	290.078	303.01	116.481	0.797487	0.844605
9	313.667						9	264.552								9	327.484						5							9	306.578						10	327.682						10	323.552
10	293						10	266.24								10	318.37						6							10	266.573						11	350.38						11	295.401
Sp8	Red							Red									Red							Red							Red							Red							Red
9	349.371	409.945	332.753	1.01967	1.0183	1.04574	9	390.502	418.584	319.912	0.980326	0.981647	0.954138		326.332	10	271.681	259.996	159.019	0.487292	0.559714	-0.100218	3		#DIV/0!	#DIV/0!	#DIV/0!	#DIV/0!	#DIV/0!	9	280.284	314.769	253.066	0.775485	0.836786	0.592149	10	358.052	349.431	273.088	0.836839	0.947424	0.86862	9	234.507	268.827	208.737	0.639644	0.737858
10	478.978						10	452.31								11	292.118						4							10	356.21						11	382.747						10	295.507
11	401.485						11	412.939								12	216.188						5							11	307.812						12	307.493						11	276.467
	Green							Green									Green							Green							Green							Green							Green
9	451.485	445.495	286.915	1.02152	0.99598	0.989955	9	413.096	404.905	274.824	0.978476	1.00423	1.01057		280.869	10	378.716	353.25	168.755	0.600831	0.59982	0	3		#DIV/0!	#DIV/0!	#DIV/0!	#DIV/0!	#DIV/0!	9	317.109	328.595	184.258	0.656027	0.669248	0.173494	10	349.031	388.782	212.446	0.756389	0.757161	0.393175	9	355.642	390.39	203.86	0.72582	0.768703
10	471.734						10	419.843								11	362.948						4							10	340.9						11	397.843						10	421.035
11	413.266						11	381.777								12	318.087						5							11	327.777						12	419.472						11	394.493
Sp9	Red							Red									Red							Red							Red							Red							Red
8	169.797	169.939	92.7474	0.935598	0.934341	0.874391	8	212.74	204.188	105.516	1.0644	1.06584	1.12595		99.1317	8	147.51	155.333	54.3567	0.548329	0.629823	0.291838	3		#DIV/0!	#DIV/0!	#DIV/0!	#DIV/0!	#DIV/0!	8	187.312	193.107	131.405	1.32556	1.43034	1.82326	8	162.109	186.646	110.303	1.11269	1.25973	1.49687	8	136.339	142.533	82.4427	0.831648	0.959343
9	179.786						9	217.328								9	171.568						4							9	206.854						9	203.495						9	154.839
10	160.234						10	182.495								10	146.922						5							10	185.156						10	194.333						10	136.422
	Green							Green									Green							Green							Green							Green							Green
8	470.021	480.498	321.918	1.01034	0.985077	0.971451	8	450.88	445.41	315.328	0.989659	1.01571	1.03005		318.623	8	351.823	336.821	152.326	0.478075	0.477271	0	3		#DIV/0!	#DIV/0!	#DIV/0!	#DIV/0!	#DIV/0!	8	340.042	360.023	215.685	0.676928	0.690571	0.408052	8	390.208	409.314	232.979	0.731205	0.731951	0.487212	8	362.24	385.578	199.048	0.624714	0.661624
9	491.068						9	445.417								9	335.292						4							9	368.708						9	420.255						9	378.208
10	480.406						10	439.932								10	323.349						5							10	371.318						10	417.479						10	416.286
Sp10	Red							Red									Red							Red							Red							Red							Red
															#DIV/0!
	Green							Green									Green							Green							Green							Green							Green
															#DIV/0!
		AVG RED	0.949581	AVG GRN	0.999103				AVG RED	1.05056	AVG GRN	1.00094						AVG RED	1.01184	AVG GRN	0.698284				AVG RED	#DIV/0!	AVG GRN	#DIV/0!				AVG RED	1.26821	AVG GRN	0.751784				AVG RED	1.04857	AVG GRN	0.747629				AVG RED	0.891219	AVG GRN	0.708459
		AVG RED0	0.807467	AVG GRN0	1.04356				AVG RED0	1.19305	AVG GRN0	0.954142						AVG RED0	3.24353	AVG GRN0	0				AVG RED0	#DIV/0!	AVG GRN0	#DIV/0!				AVG RED0	5.4725	AVG GRN0	0.0956628				AVG RED0	1.86252	AVG GRN0	-0.184543				AVG RED0	0.489892	AVG GRN0	-0.765001
bg1	Red	AVG	AVG Total				bg1	Red	AVG	AVG Total						bg1	Red	AVG	AVG Total				bg1	Red	AVG	AVG Total				bg1	Red	AVG	AVG Total				bg1	Red	AVG	AVG Total				bg1	Red	AVG	AVG Total
5	46.9074	45.2284	77.1919				5	82.2778	78.4807	98.6716						5	90.6991	80.9977	100.977				3		#DIV/0!	#DIV/0!				5	40.1852	38.1304	61.7027				5	57.713	53.0694	76.3428				5	49.8287	41.9198	60.0903
6	47.4537						6	80.7454								6	83.713						4							6	39.0093						6	52.537						6	40.713
7	45.8472						7	79.4074								7	79.6944						5							7	40.8241						7	50.912						7	40.6204
8	43.963						8	75.6713								8	80.2917						6							8	34.1713						8	52.6898						8	50.338
9	42.9954						9	75.9074								9	78.3704						7							9	35.1065						9	53.8704						9	36.6713
10	44.2037						10	76.875								10	73.2176						8							10	39.4861						10	50.6944						10	33.3472
	Green							Green									Green							Green							Green							Green							Green
5	142.532	138.019	158.58				5	136.991	123.789	130.082						5	168.857	165.542	184.495				3		#DIV/0!	#DIV/0!				5	120.972	130.803	144.338				5	145.801	151.811	176.335				5	178.542	165.629	186.53
6	151.236						6	128.19								6	169.917						4							6	150.491						6	165.583						6	165.143
7	144.282						7	123.213								7	168.912						5							7	141.616						7	150.481						7	160.861
8	127.338						8	120.926								8	158.954						6							8	128.94						8	152.847						8	171.991
9	132.523						9	120.861								9	158.509						7							9	124.148						9	151.412						9	154.884
10	130.204						10	112.551								10	168.102						8							10	118.653						10	144.741						10	162.352
bg2	Red						bg2	Red								bg2	Red						bg2	Red						bg2	Red						bg2	Red						bg2	Red
5	103.792	80.7362					5	121.269	106.317							5	143.185	120.209					3		#DIV/0!					5	87.7222	78.8457					5	114.986	92					5	75.1343	64.7639
6	91.31						6	112.963								6	121.245						4							6	85.4954						6	91.7407						6	74.5509
7	72.912						7	103.838								7	120.093						5							7	78.7407						7	84.9398						7	65.0648
8	65.866						8	99.8009								8	115.847						6							8	74.1991						8	92.338						8	58.0324
9	76.486						9	100.398								9	108.046						7							9	72.6065						9	91.75						9	51.2731
10	74.051						10	99.6343								10	112.838						8							10	74.3102						10	76.2454						10	64.5278
	Green							Green									Green							Green							Green							Green							Green
5	143.153	162.954					5	115.259	127.706							5	196.389	194.801					3		#DIV/0!					5	182.958	155.574					5	228.88	198.819					5	203.204	190.414
6	159.403						6	124.676								6	187.722						4							6	150.921						6	201.806						6	204.153
7	177.296						7	133.148								7	187.25						5							7	144.194						7	208.954						7	189.366
8	173.75						8	128								8	211.63						6							8	153.009						8	188.63						8	189.153
9	157.255						9	129.454								9	197.769						7							9	164.634						9	191.889						9	183.528
10	166.866						10	135.699								10	188.046						8							10	137.727						10	172.755						10	173.083
bg3	Red						bg3	Red								bg3	Red						bg3	Red						bg3	Red						bg3	Red						bg3	Red
5	119.185	105.611					5	124.329	111.217							5	118.069	101.723					3		#DIV/0!					5	83.8333	68.132					5	111.273	83.9591					5	94.3148	73.5872
6	112.958						6	112.356								6	111.097						4							6	72.3565						6	99.1759						6	75.162
7	99.7176						7	105.144								7	104.051						5							7	68.838						7	83.412						7	78.6852
8	106.449						8	109.171								8	87.9583						6							8	69.8241						8	76.8056						8	64.7222
9	96.6713						9	107.87								9	89.7731						7							9	60.8056						9	70.412						9	62.2361
10	98.6852						10	108.431								10	99.3889						8							10	53.1343						10	62.6759						10	66.4028
	Green							Green									Green							Green							Green							Green							Green
5	167.106	174.768					5	144.014	138.75							5	192.69	193.144					3		#DIV/0!					5	156.995	146.636					5	210.449	178.376					5	207.694	203.545
6	169.903						6	117.981								6	211.644						4							6	146.935						6	191.245						6	205.407
7	158.569						7	119.097								7	213.417						5							7	142.667						7	169.245						7	185.773
8	176.171						8	143.537								8	186.63						6							8	153.134						8	158.333						8	197.407
9	187.12						9	140.065								9	168.421						7							9	133.917						9	162.63						9	213.722
10	189.736						10	167.806								10	186.06						8							10	146.167						10	178.352						10	211.269
	Baseline1							Baseline2									Bleach0							Bleach2							Bleach5							Bleach10							Bleach20
cnt1	Red	AVG	AVG-Bg	AVG total	Norm B		cnt1	Red	AVG	AVG-Bg	AVG total	Norm B			Baseline T	cnt1	Red	AVG	AVG-Bg	AVG total	Norm B		cnt1	Red	AVG	AVG-Bg	AVG total	Norm B		cnt1	Red	AVG	AVG-Bg	AVG total	Norm B		cnt1	Red	AVG	AVG-Bg	AVG total	Norm B		cnt1	Red	AVG	AVG-Bg	AVG total	Norm B
10	424.864	398.357	321.165	428.692	1.00135		10	453.447	451.583	352.912	427.539	0.998654			428.115	10	364.912	404.023	303.047	372.721	0.870608		6		#DIV/0!	#DIV/0!	#DIV/0!	#DIV/0!		10	326.588	296.791	235.088	396.753	0.926743		10	308.684	363.332	286.989	378.145	0.883278		9	227.364	327.949	267.858	371.131	0.866894
11	432.93						11	476.031								11	430.044						7							11	337.377						11	420.789						10	371.513
12	337.276						12	425.272								12	417.114						8							12	226.408						12	360.522						11	384.969
	Green							Green									Green							Green							Green							Green							Green
10	427.136	448.303	289.723	404.661	1.02565		10	395.101	391.65	261.569	384.424	0.974353			394.543	10	387.303	460.021	275.525	395.208	1.00169		6		#DIV/0!	#DIV/0!	#DIV/0!	#DIV/0!		10	432.693	460.952	316.614	386.748	0.980244		10	375.86	453.481	277.146	394.14	0.998981		9	384.741	417.75	231.22	372.532	0.944213
11	447.662						11	398.482								11	463.079						7							11	479.737						11	482.443						10	435.737
12	470.11						12	381.368								12	529.68						8							12	470.425						12	502.14						11	432.772
cnt2	Red						cnt2	Red								cnt2	Red						cnt2	Red						cnt2	Red						cnt2	Red						cnt2	Red
9	365	321.886	244.694				8	268.731	319.7	221.029						9	284.264	338.466	237.489				4		#DIV/0!	#DIV/0!				8	236.773	280.008	218.305				9	238.458	273.926	197.583				8	187.949	272.559	212.468
10	356.287						9	361.676								10	377.023						5							9	323.579						10	323.398						9	350.815
11	244.37						10	328.694								11	354.111						6							10	279.671						11	259.921						10	278.912
	Green							Green									Green							Green							Green							Green							Green
9	384.338	404.288	245.708				8	298.671	332.896	202.815						9	366.287	406.38	221.884				4		#DIV/0!	#DIV/0!				8	310.051	358.164	213.826				9	343.431	392.787	216.452				8	332.278	377.641	191.111
10	418.171						9	343.407								10	414.755						5							9	364.898						10	414.606						9	399.431
11	410.356						10	356.611								11	438.097						6							10	399.542						11	420.324						10	401.213
cnt3	Red						cnt3	Red								cnt3	Red						cnt3	Red						cnt3	Red						cnt3	Red						cnt3	Red
4	456.782	553.278	476.086				4	433.708	497.616	398.944						5	490.292	521.477	420.5				4		#DIV/0!	#DIV/0!				4	347.597	419.153	357.45				6	502.412	491	414.657				6	436.722	459.307	399.217
5	632.56						5	556.278								6	578.403						5							5	467.926						7	555.403						7	520.685
6	570.491						6	502.861								7	495.736						6							6	441.935						8	415.185						8	420.514
	Green							Green									Green							Green							Green							Green							Green
4	1007.06	1121.61	963.034				4	931.722	1007.48	877.394						5	1075.67	1082.53	898.032				4		#DIV/0!	#DIV/0!				4	843.944	983.004	838.667				6	1173.13	1108.85	932.518				6	1032.12	1069.02	882.492
5	1221.56						5	1122.07								6	1165.67						5							5	1127.44						7	1203.95						7	1150.59
6	1136.23						6	968.639								7	1006.24						6							6	977.625						8	949.477						8	1024.36
cnt4	Red						cnt4	Red								cnt4	Red						cnt4	Red						cnt4	Red						cnt4	Red						cnt4	Red
5	353.5	353.944	276.752				5	391.75	403.437	304.765						6	335.847	353.779	252.803				5		#DIV/0!	#DIV/0!				5	349.551	377.445	315.742				6	307.921	342.269	265.926				5	300.481	307.689	247.599
6	354.597						6	418.699								7	379.662						6							6	403.394						7	363.579						6	308.856
7	353.736						7	399.861								8	345.829						7							7	379.389						8	355.306						7	313.731
	Green							Green									Green							Green							Green							Green							Green
5	457.991	455.15	296.57				5	402.625	395.099	265.017						6	479.245	500.716	316.221				5		#DIV/0!	#DIV/0!				5	437.449	440.418	296.08				6	484.907	494.954	318.618				5	524.19	496.176	309.646
6	459.806						6	393.514								7	510.801						6							6	437.819						7	509.181						6	513.44
7	447.653						7	389.157								8	512.102						7							7	445.986						8	490.773						7	450.898
cnt5	Red						cnt5	Red								cnt5	Red						cnt5	Red						cnt5	Red						cnt5	Red						cnt5	Red
3	513.482	527.776	450.584				3	513.662	535.146	436.475						4	503.519	503.963	402.987				5		#DIV/0!	#DIV/0!				4	479.06	449.191	387.489				4	432.583	449.714	373.371				4	462.394	436.878	376.788
4	575.384						4	582.393								5	556.931						6							5	487.333						5	492.148						5	465.745
5	494.463						5	509.384								6	451.44						7							6	381.181						6	424.412						6	382.495
	Green							Green									Green							Green							Green							Green							Green
3	512.306	508.104	349.524				3	513.954	506.654	376.573						4	620.741	599.444	414.949				5		#DIV/0!	#DIV/0!				4	501.949	514.031	369.693				4	551.509	561.224	384.888				4	620.551	560.946	374.416
4	492.468						4	507.653								5	622.06						6							5	537.977						5	558.542						5	562.792
5	519.537						5	498.356								6	555.532						7							6	502.167						6	573.62						6	499.495
cnt6	Red						cnt6	Red								cnt6	Red						cnt6	Red						cnt6	Red						cnt6	Red						cnt6	Red
4	561.005	621.244	544.052				4	586.449	663.077	564.405						5	611.907	549.008	448.031				7		#DIV/0!	#DIV/0!				4	590.009	683.798	622.095				5	614.537	609.662	533.319				4	511.648	624.403	564.312
5	663.75						5	750.014								6	614						8							5	765.921						6	663.866						5	659.958
6	638.977						6	652.768								7	421.116						9							6	695.463						7	550.583						6	701.602
	Green							Green									Green							Green							Green							Green							Green
4	510.315	590.034	431.454				4	499.889	573.344	443.263						5	584.097	579.744	395.249				7		#DIV/0!	#DIV/0!				4	555.157	635.949	491.611				5	594.954	604.966	428.631				4	601.338	618.699	432.17
5	630.148						5	616.718								6	577.482						8							5	675.917						6	639.25						5	642.542
6	629.639						6	603.426								7	577.653						9							6	676.773						7	580.694						6	612.218
cnt7	Red						cnt7	Red								cnt7	Red						cnt7	Red						cnt7	Red						cnt7	Red						cnt7	Red
3	650.699	581.81	504.618				2	447.764	567.537	468.865						3	458.954	531.511	430.534				6		#DIV/0!	#DIV/0!				3	457.056	467.068	405.365				4	566.097	524.955	448.612				3	523.875	531.585	471.494
4	634.528						3	641.046								4	606.838						7							4	538.833						5	567.921						4	563.009
5	460.204						4	613.801								5	528.741						8							5	405.315						6	440.847						5	507.87
	Green							Green									Green							Green							Green							Green							Green
3	517.819	488.734	330.154				2	437.593	467.831	337.749						3	466.667	496.337	311.841				6		#DIV/0!	#DIV/0!				3	429.856	439.756	295.418				4	480.991	499.44	323.105				3	458.579	477.253	290.724
4	515.944						3	479.13								4	543.838						7							4	438.273						5	548.667						4	492.093
5	432.44						4	486.769								5	478.505						8							5	451.139						6	468.662						5	481.088
cnt8	Red						cnt8	Red								cnt8	Red						cnt8	Red						cnt8	Red						cnt8	Red						cnt8	Red
3	734.884	712.014	634.822				3	755.412	749.742	651.071						4	652.287	608.671	507.695				5		#DIV/0!	#DIV/0!				3	699.69	734.137	672.435				4	661.639	648.665	572.322				4	608.278	572.853	512.763
4	743.38						4	776.537								5	648.662						6							4	765.102						5	687.685						5	627.032
5	657.778						5	717.278								6	525.065						7							5	737.62						6	596.671						6	483.25
	Green							Green									Green							Green							Green							Green							Green
3	498.773	514.369	355.789				3	461.787	492.184	362.102						4	551.736	562.028	377.533				5		#DIV/0!	#DIV/0!				3	476.389	508.631	364.293				4	514.949	531.273	354.938				4	572.046	556.22	369.691
4	516.764						4	520.384								5	593.755						6							4	528.782						5	545.449						5	578.143
5	527.569						5	494.38								6	540.593						7							5	520.722						6	533.421						6	518.472
cnt9	Red						cnt9	Red								cnt9	Red						cnt9	Red						cnt9	Red						cnt9	Red						cnt9	Red
5	481.921	482.642	405.45				5	566.926	548.059	449.387						5	454.301	452.375	351.399				5		#DIV/0!	#DIV/0!				5	428.074	418.509	356.807				5	346.616	386.869	310.526				5	385.259	347.767	287.676
6	509.94						6	590.657								6	460.181						6							6	451.162						6	458.644						6	385.106
7	456.065						7	486.593								7	442.644						7							7	376.292						7	355.347						7	272.935
	Green							Green									Green							Green							Green							Green							Green
5	563.87	538.579	379.999				5	492.005	463.412	333.33						5	543.287	530.13	345.634				5		#DIV/0!	#DIV/0!				5	463.731	438.864	294.526				5	456.574	487.303	310.967				5	476.218	457.847	271.318
6	560.264						6	488.486								6	580.176						6							6	464.694						6	549.153						6	480.602
7	491.602						7	409.745								7	466.926						7							7	388.167						7	456.181						7	416.722
cnt10	Red						cnt10	Red								cnt10	Red						cnt10	Red						cnt10	Red						cnt10	Red						cnt10	Red
	Green							Green									Green							Green							Green							Green							Green
[truncated: 33 more columns]

[truncated: 8 more sheets: s2_23B, s3_23B, s4_23B, s5_23B, s6_23B, Template, Summary, Summary_final]
